# 1 Genomic analysis of European *Drosophila* populations reveals 2 longitudinal structure and continent-wide selection

3  
4 Martin Kapun<sup>1,2,3,\*</sup>, Maite G. Barrón<sup>1,4,\*</sup>, Fabian Staubach<sup>1,5,§</sup>, Jorge Vieira<sup>1,6,7</sup>, Darren J.  
5 Obbard<sup>1,8</sup>, Clément Goubert<sup>1,9,10</sup>, Omar Rota-Stabelli<sup>1,11</sup>, Maaria Kankare<sup>1,12,§</sup>, Annabelle  
6 Haudry<sup>1,9</sup>, R. Axel W. Wiberg<sup>1,13,14</sup>, Lena Waidele<sup>1,5</sup>, Iryna Kozeretska<sup>1,15</sup>, Elena G.  
7 Pasyukova<sup>1,16</sup>, Volker Loeschcke<sup>1,17</sup>, Marta Pascual<sup>1,18</sup>, Cristina P. Vieira<sup>1,6,7</sup>, Svitlana  
8 Serga<sup>1,15</sup>, Catherine Montchamp-Moreau<sup>1,19</sup>, Jessica Abbott<sup>1,20</sup>, Patricia Gibert<sup>1,9</sup>, Damiano  
9 Porcelli<sup>1,21</sup>, Nico Posnien<sup>1,22</sup>, Sonja Grath<sup>1,23</sup>, Élio Sucena<sup>1,24,25</sup>, Alan O. Bergland<sup>1,26,§</sup>,  
10 Maria Pilar Garcia Guerreiro<sup>1,27</sup>, Banu Sebnem Onder<sup>1,28</sup>, Eliza Argyridou<sup>1,23</sup>, Lain Guio<sup>1,4</sup>,  
11 Mads Fristrup Schou<sup>1,17</sup>, Bart Deplancke<sup>1,29</sup>, Cristina Vieira<sup>1,9</sup>, Michael G. Ritchie<sup>1,13</sup>, Bas  
12 J. Zwaan<sup>1,30</sup>, Eran Tauber<sup>1,31</sup>, Dorcas J. Orengo<sup>1,18</sup>, Eva Puerma<sup>1,18</sup>, Montserrat  
13 Agudé<sup>1,18</sup>, Paul S. Schmidt<sup>1,32,§</sup>, John Parsch<sup>1,23</sup>, Andrea J. Betancourt<sup>1,33</sup>, Thomas  
14 Flatt<sup>1,2,3,t,\*</sup>, Josefa González<sup>1,4,t,\*</sup>

15  
16 <sup>1</sup> The European *Drosophila* Population Genomics Consortium (*DrosEU*)

17 <sup>2</sup> Department of Ecology and Evolution, University of Lausanne, CH-1015 Lausanne,  
18 Switzerland

19 <sup>3</sup> Department of Biology, University of Fribourg, CH-1700 Fribourg, Switzerland

20 <sup>4</sup> Institute of Evolutionary Biology, CSIC-Universitat Pompeu Fabra, Barcelona, Spain

21 <sup>5</sup> Department of Evolutionary Biology and Ecology, University of Freiburg, 79104 Freiburg,  
22 German

23 <sup>6</sup> Instituto de Biologia Molecular e Celular (IBMC) University of Porto, Porto, Portugal

24 <sup>7</sup> Instituto de Investigação e Inovação em Saúde (I3S), University of Porto, Porto, Portugal

25 <sup>8</sup> Institute of Evolutionary Biology, University of Edinburgh, Edinburgh, United Kingdom

26 <sup>9</sup> Laboratoire de Biométrie et Biologie Evolutive, UMR CNRS 5558, University Lyon 1,  
27 Lyon, France

28 <sup>10</sup> Department of Molecular Biology and Genetics, 107 Biotechnology Building, Cornell  
29 University, Ithaca, New York 14853, USA

30 <sup>11</sup> Research and Innovation Centre, Fondazione Edmund Mach, San Michele all' Adige,  
31 Italy

32 <sup>12</sup> Department of Biological and Environmental Science, University of Jyväskylä,  
33 Jyväskylä, Finland

34 <sup>13</sup> Centre for Biological Diversity, School of Biology, University of St. Andrews, St Andrews,  
35 United Kingdom

36 <sup>14</sup> Evolutionary Biology, Zoological Institute, University of Basel, Basel, CH-4051,  
37 Switzerland

38 <sup>15</sup> General and Medical Genetics Department, Taras Shevchenko National University of  
39 Kyiv, Kyiv, Ukraine

40 <sup>16</sup> Laboratory of Genome Variation, Institute of Molecular Genetics of RAS, Moscow,  
41 Russia

42 <sup>17</sup> Department of Bioscience - Genetics, Ecology and Evolution, Aarhus University, Aarhus  
43 C, Denmark

44 <sup>18</sup> Departament de Genètica, Microbiologia i Estadística, Facultat de Biologia and Institut  
45 de Recerca de la Biodiversitat (IRBio), Universitat de Barcelona, Barcelona, Spain

46 <sup>19</sup> Laboratoire Evolution, Génomes, Comportement et Ecologie (EGCE) UMR 9191 CNRS  
47 - UMR247 IRD - Université Paris Sud - Université Paris Saclay. 91198 Gif sur Yvette  
48 Cedex, France.

49 <sup>20</sup> Department of Biology, Section for Evolutionary Ecology, Lund, Sweden

50 <sup>21</sup> Department of Animal and Plant Sciences, Sheffield, United Kingdom

- 51 <sup>22</sup>Universität Göttingen, Johann-Friedrich-Blumenbach-Institut für Zoologie und  
52 Anthropologie, Göttingen, Germany
- 53 <sup>23</sup> Division of Evolutionary Biology, Faculty of Biology, Ludwig-Maximilians-Universität  
54 München, Planegg, Germany
- 55 <sup>24</sup> Instituto Gulbenkian de Ciência, Oeiras, Portugal
- 56 <sup>25</sup>Departamento de Biologia Animal, Faculdade de Ciências da Universidade de Lisboa,  
57 Lisboa, Portugal
- 58 <sup>26</sup> Department of Biology, University of Virginia, Charlottesville, VA, USA
- 59 <sup>27</sup> Departament de Genètica i Microbiologia, Universitat Autònoma de Barcelona,  
60 Barcelona, Spain
- 61 <sup>28</sup> Department of Biology, Faculty of Science, Hacettepe University, Ankara, Turkey
- 62 <sup>29</sup> Laboratory of Systems Biology and Genetics, EPFL-SV-IBI-UPDEPLA, CH-1015  
63 Lausanne, Switzerland
- 64 <sup>30</sup> Laboratory of Genetics, Department of Plant Sciences, Wageningen University,  
65 Wageningen, Netherlands
- 66 <sup>31</sup> Department of Evolutionary and Environmental Biology and Institute of Evolution,  
67 University of Haifa, Haifa, Israel
- 68 <sup>32</sup> Department of Biology, University of Pennsylvania, Philadelphia, USA
- 69 <sup>33</sup> Institute of Integrative Biology, University of Liverpool, Liverpool, United Kingdom  
70
- 71 † **For correspondence:** [thomas.flatt@unifr.ch](mailto:thomas.flatt@unifr.ch), [josefa.gonzalez@ibe.upf-csic.es](mailto:josefa.gonzalez@ibe.upf-csic.es)
- 72
- 73 \* These authors contributed equally to this work
- 74
- 75 § Members of the *Drosophila* Real Time Evolution (Dros-RTEC) Consortium

76

77 **Competing interests:** The authors declare that no competing interests exist.

78

## 79 **Abstract**

80 Genetic variation is the fuel of evolution. However, analyzing evolutionary dynamics in  
81 natural populations is challenging, sequencing of entire populations remains costly and  
82 comprehensive sampling logistically difficult. To tackle this issue and to define relevant  
83 spatial and temporal scales of variation, we have founded the European  
84 *Drosophila* Population Genomics Consortium (*DrosEU*). Here we present the first analysis  
85 of 48 *D. melanogaster* population samples collected across Europe in 2014. Our analysis  
86 uncovers novel patterns of variation at multiple levels: genome-wide neutral SNPs, mtDNA  
87 haplotypes, inversions, and TEs showing previously cryptic longitudinal population  
88 structure; signatures of selective sweeps shared among populations; presumably adaptive  
89 clines in inversions; and geographic variation in TEs. Additionally, we document highly  
90 variable microbiota and identify several new *Drosophila* viruses. Our study reveals novel  
91 aspects of the population biology of *D. melanogaster* and illustrates the power of extensive  
92 sampling and pooled sequencing of populations on a continent-wide scale.

93

94 **Keywords:** *Drosophila*, population genomics, demography, selection, clines, SNPs,  
95 structural variants, symbionts.

96

## 97 **Introduction**

98 Genetic variation is the raw material for evolutionary change. Understanding the processes  
99 that create and maintain variation in natural populations remains a fundamental goal in  
100 evolutionary biology. The identification of patterns of genetic variation within and among

101 taxa (Dobzhansky 1970; Lewontin 1974; Kreitman 1983; Kimura 1984; Hudson *et al.* 1987;  
102 McDonald & Kreitman 1991; e.g., Adrian & Comeron 2013) provides fundamental insights  
103 into the action of various evolutionary forces. Historically, due to technological constraints,  
104 studies of genetic variation were limited to single loci or small genomic regions and to  
105 static sampling of small numbers of individuals from natural populations. The development  
106 of population genomics has extended such analyses to patterns of variation on a genome-  
107 wide scale (e.g., Black *et al.* 2001; Jorde *et al.* 2001; Luikart *et al.* 2003; Begun *et al.* 2007;  
108 Sella *et al.* 2009; Charlesworth 2010; Casillas & Barbadilla 2017). This has resulted in  
109 fundamental advances in our understanding of historical and contemporaneous  
110 evolutionary dynamics in natural populations (e.g., Sella *et al.* 2009; Hohenlohe *et al.*  
111 2010; Cheng *et al.* 2012; Fabian *et al.* 2012; Pool *et al.* 2012; Messer & Petrov 2013;  
112 Ellegren 2014; Harpur *et al.* 2014; Kapun *et al.* 2014; Bergland *et al.* 2014; Charlesworth  
113 2015; Zanini *et al.* 2015; Kapun *et al.* 2016a; Casillas & Barbadilla 2017).

114  
115 However, large-scale sampling and genome sequencing of entire populations remains  
116 largely prohibitive in terms of sequencing costs and labor-intensive sample collection,  
117 limiting the number of populations that can be analyzed. Evolution is a highly dynamic  
118 process across a variety of spatial scales in many taxa; thus, to generate a comprehensive  
119 context for population genomic analyses, it is essential to define the appropriate spatial  
120 scales of analysis, from meters to thousands of kilometers (Levins 1968; Endler 1977;  
121 Richardson *et al.* 2014). Furthermore, one-time sampling of natural populations provides  
122 only a static view of patterns of genetic variation. Allele frequency changes can be highly  
123 dynamic even across very short timescales (e.g., Umina *et al.* 2005; Bergland *et al.* 2014;  
124 Behrman *et al.* 2018), and theoretical work suggests that such temporal dynamics may be  
125 an important yet largely understudied mechanism by which genetic variation is maintained

126 (Wittmann *et al.* 2017). It is thus essential to define the relevant spatio-temporal scales for  
127 sampling and population genomic analyses accordingly.

128

129 To generate a population genomic framework that can deliver appropriate high-resolution  
130 sampling and to provide a unique resource to the research community, we formed the  
131 European *Drosophila* Population Genomics Consortium (*DrosEU*; <https://droseu.net>). Our  
132 primary objective is to utilize the strengths of this consortium to extensively sample and  
133 sequence European populations of *Drosophila melanogaster* on a continent-wide scale  
134 and across distinct timescales. In close cooperation with a complementary effort focused  
135 on North American populations, the *Drosophila* Real Time Evolution Consortium (*Dros-*  
136 *RTEC*; <http://web.sas.upenn.edu/paul-schmidt-lab/dros-rtec/>), our long-term goal is to  
137 define the appropriate spatio-temporal scales at which populations should be sampled and  
138 analyzed and to gain novel insights into the dynamics of genetic variation.

139

140 *D. melanogaster* offers several advantages for such a concerted sampling and analysis  
141 effort: a relatively small genome, a broad geographic range, a multivoltine life history that  
142 allows sampling across generations over short timescales, ease of sampling natural  
143 populations using standardized techniques, an extensive research community and a well-  
144 developed context for population genomic analysis (Powell 1997; Keller 2007; Hales *et al.*  
145 2015). The species is native to sub-Saharan Africa and has subsequently expanded its  
146 range into novel habitats in Europe over the last 10,000-15,000 years and in North  
147 America and Australia in the last several hundred years (e.g., Lachaise *et al.* 1988; David  
148 & Capy 1988; Keller 2007). On both the North American and Australian continents, the  
149 prevalence of latitudinal clines in frequencies of alleles (e.g., Schmidt & Paaby 2008;  
150 Turner *et al.* 2008; Kolaczkowski *et al.* 2011b; Fabian *et al.* 2012; Bergland *et al.* 2014;

151 Machado *et al.* 2016; Kapun *et al.* 2016a), structural variants such as chromosomal  
152 inversions (Mettler *et al.* 1977; Voelker *et al.* 1978; Knibb *et al.* 1981; Knibb 1982; 1986;  
153 Anderson *et al.* 1991; Rako *et al.* 2006; Kapun *et al.* 2014; Rane *et al.* 2015; Kapun *et al.*  
154 2016a) and transposable elements (TEs) (Boussy *et al.* 1998; González *et al.* 2008; 2010),  
155 as well as complex phenotypes (de Jong & Bochdanovits 2003; Schmidt & Paaby 2008;  
156 Schmidt *et al.* 2008; Flatt *et al.* 2013; Adrion *et al.* 2015 and references therein; Kapun *et*  
157 *al.* 2016b; Behrman *et al.* 2018) have been interpreted to result from local adaptation to  
158 environmental factors that co-vary with latitude or as the legacy of an out-of-Africa  
159 dispersal history. However, sampling across these latitudinal gradients has not been  
160 replicated outside of a single transect on the east coasts of both continents. The observed  
161 latitudinal clines on the east coasts of North America and Australia may have been  
162 generated, at least in part, by demography and differential colonization histories of  
163 populations at high and low latitudes (Bergland *et al.* 2016). In North America, for example,  
164 temperate populations appear to be largely of European origin, whereas low-latitude  
165 populations show evidence of greater admixture from ancestral African populations and  
166 the Caribbean (Caracristi & Schlötterer 2003; Yukilevich & True 2008a; b; Duchon *et al.*  
167 2013; Kao *et al.* 2015; Bergland *et al.* 2016). More intensive sampling and analysis of both  
168 African as well as European populations is thus essential to disentangling the relative  
169 importance of local adaptation versus colonization history and demography in generating  
170 the clinal patterns that have been widely observed. While there has been a great deal of  
171 progress in the analysis of ancestral African populations (e.g., Begun & Aquadro 1993;  
172 Corbett-Detig & Hartl 2012; Pool *et al.* 2012; Fabian *et al.* 2015; Lack *et al.* 2015; 2016),  
173 the European continent remains largely uncharacterized at the population genomic level  
174 (Božičević *et al.* 2016; Pool *et al.* 2016; Mateo *et al.* 2018).

175

176 Here, we present the first analysis of the *DrosEU* pool-sequencing data from a set of 48  
177 European population samples collected in 2014. Our main focus is on describing spatial  
178 variation across the European continent. A similar consortium has been organized mainly  
179 in the United States, the *Dros-RTEC* consortium. While the two consortia share the  
180 common goal of widespread and coordinate sampling, the *Dros-RTEC* consortium  
181 concentrates on seasonal dynamics in North American populations (Machado *et al.* 2018).  
182 We examine the 2014 *DrosEU* data at three levels: (1) patterns of variation at single-  
183 nucleotide polymorphisms (SNPs) in the nuclear ( $\sim 5.5 \times 10^6$  SNPs) and mitochondrial  
184 (mtDNA) genomes; (2) variation in copy number of transposable elements (TEs); (3)  
185 cosmopolitan chromosomal inversions previously associated with climate adaptation; and  
186 (4) variation among populations in microbiota, including endosymbionts, bacteria, and  
187 viruses (Figure 1).



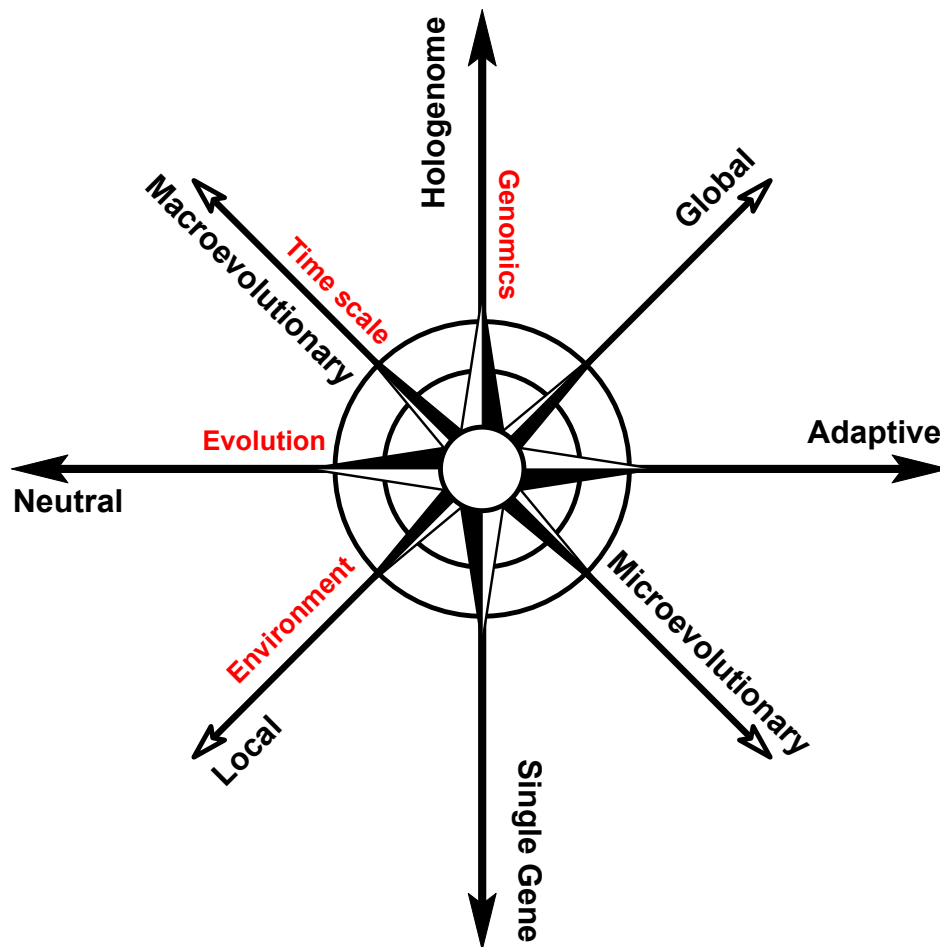

188

189 **Figure 1. The conceptual framework of the *DrosEU* consortium.** By intensive spatio-temporal sampling of natural  
190 populations of *Drosophila melanogaster*, the European *Drosophila* Population Genomics Consortium (*DrosEU*;  
191 <http://droseu.net/>), aims to uncover the factors that shape the evolutionary dynamics of this exemplary model organism.  
192 Each of the repeatedly and consistently sampled *DrosEU* populations is subject to evolutionary forces ("Evolution axis",  
193 from neutral to adaptive evolution) in interaction with the environment ("Environment axis", from local aspects to global  
194 patterns, including spatial factors). In addition, there are several dimensions along which the fly genomes can be studied,  
195 from single SNPs and genes to structural variants and co-evolving genomes ("Genomics axis"), both over short and long  
196 timescales ("Timescale axis").

197

198

199 We find that European populations of *D. melanogaster* exhibit novel patterns of variation at  
200 all levels investigated: neutral SNPs in the nuclear genome and mtDNA haplotypes that

201 reveal previously unknown longitudinal population structure; genomic regions consistent  
202 with selective sweeps that indicate selection on a continent-wide scale; new evidence for  
203 inversion clines in Europe; and spatio-temporal variation in TEs frequencies. We also  
204 identify four new DNA viruses and for the first time assemble the complete genome of a  
205 fifth. These novel features are revealed by the comprehensive magnitude of our  
206 coordinated sampling, thus demonstrating the utility of this approach.

207

208 Together with other large-scale genomic datasets for *D. melanogaster* (Casillas &  
209 Barbadilla 2017) our data provide a rich and powerful community resource for studies of  
210 molecular population genetics. Importantly, the *DrosEU* dataset represents the first  
211 comprehensive characterization of genetic variation in *D. melanogaster* on the European  
212 continent and might yield important insights into how this species has adapted to  
213 temperate climates after its migration out of Africa.

214

## 215 **Results**

216 As part of the *DrosEU* effort, we collected and sequenced 48 population samples of *D.*  
217 *melanogaster* from 32 geographical locations across Europe in 2014 (Table 1; Figure 2  
218 and Figure 3A).

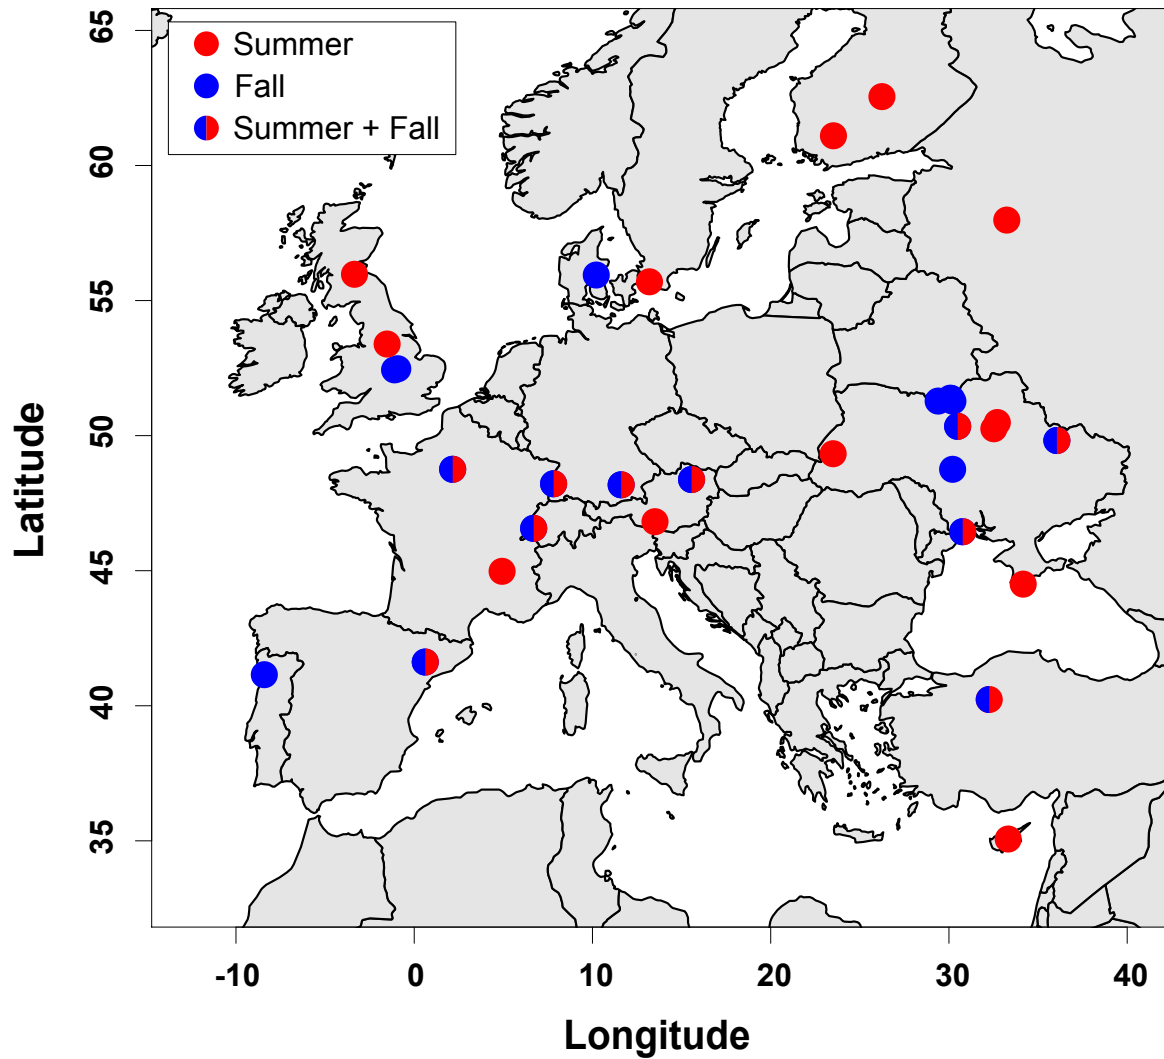

219

220 **Figure 2. The geographic distribution of population samples.** The map shows the geographic locations of all  
221 samples in the 2014 *DrosEU* dataset. The color of the circles indicates the sampling season for each location (see Table  
222 1 and Supplemental Table 1). Note that some of the 12 Ukrainian locations overlap in the map.

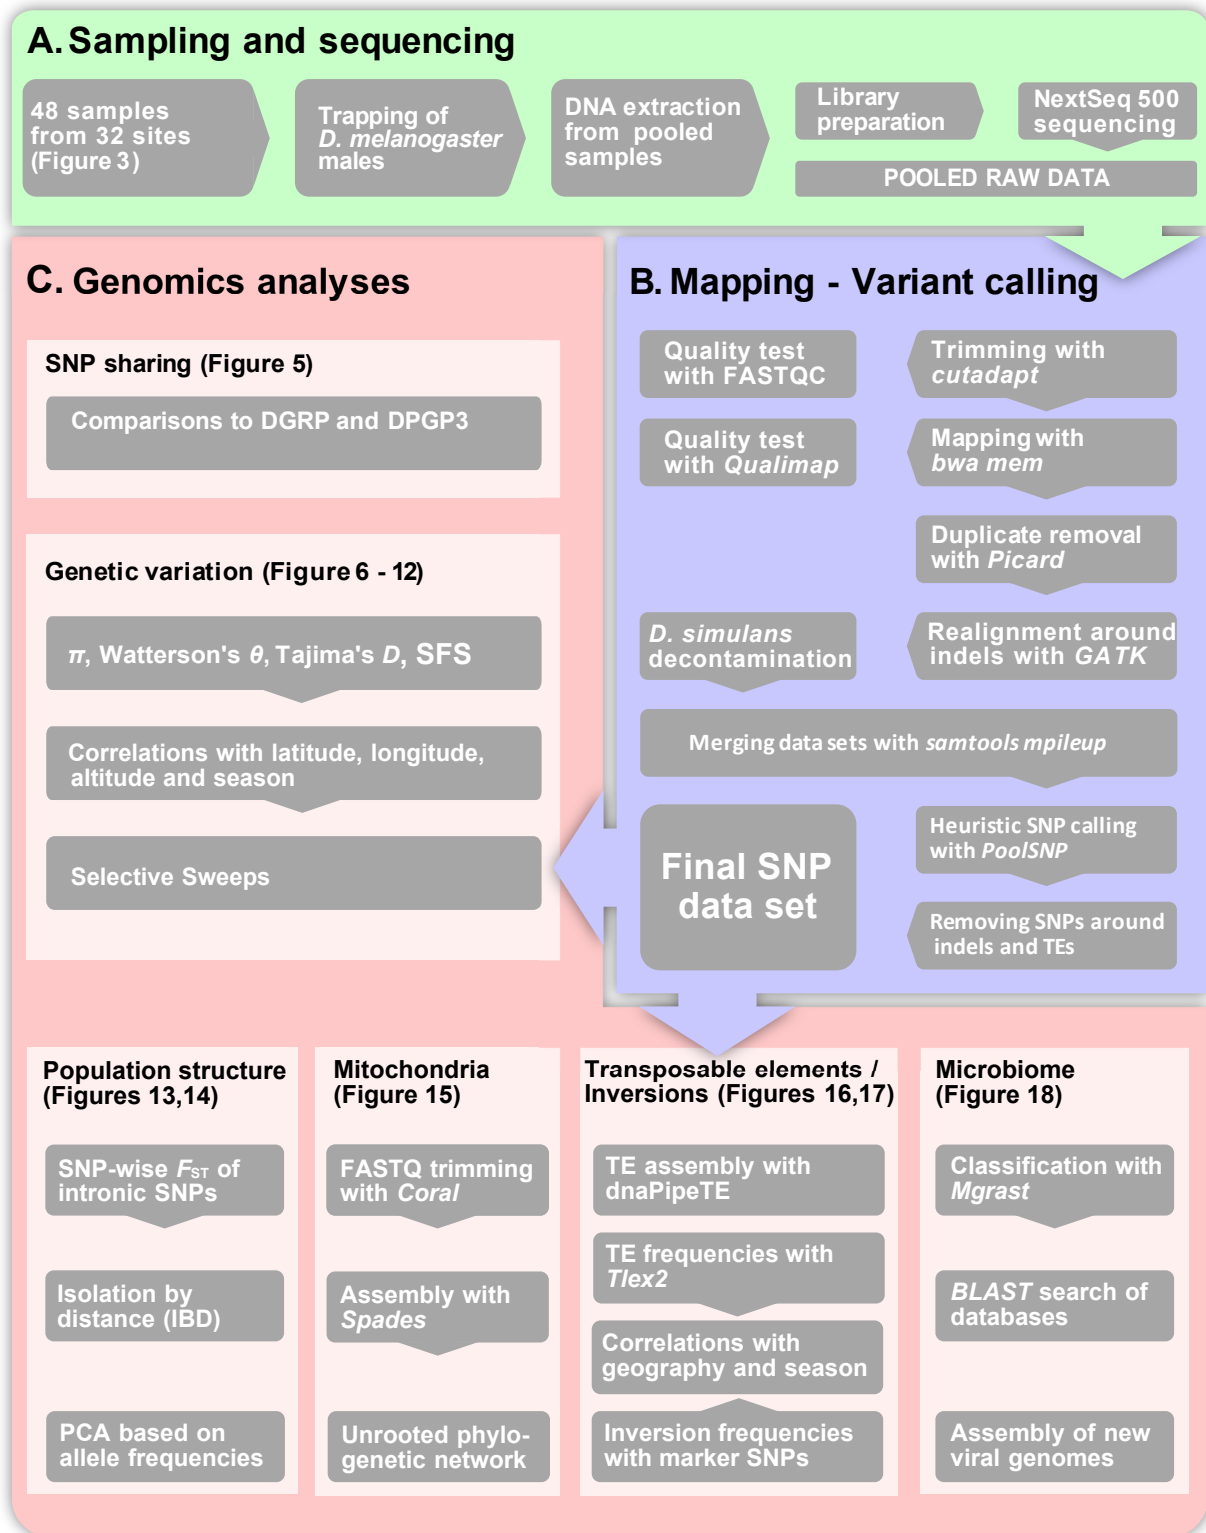

223

224 **Figure 3. Sampling and data analysis pipeline.** The schematic diagram shows the workflow of data collection and  
 225 processing (A) followed by bioinformatic approaches used for quality assessment and read mapping (B) as well as the  
 226 downstream analyses (C) conducted in this study (see Materials and Methods for further information).

227

228 While our analyses focus on spatial patterns, thirteen of the 32 locations were sampled  
229 repeatedly during the year (at least twice, once in summer and once in fall), allowing a  
230 first, crude analysis of seasonal changes in allele frequencies on a genome-wide level  
231 (Figure 2). For an extensive analysis of temporal (seasonal) patterns in mainly North  
232 American populations see the companion paper by Machado *et al.* (2018). All 48 samples  
233 were sequenced to high coverage, with a mean coverage per population of >50x (Table  
234 S1 and Figure 4).

235

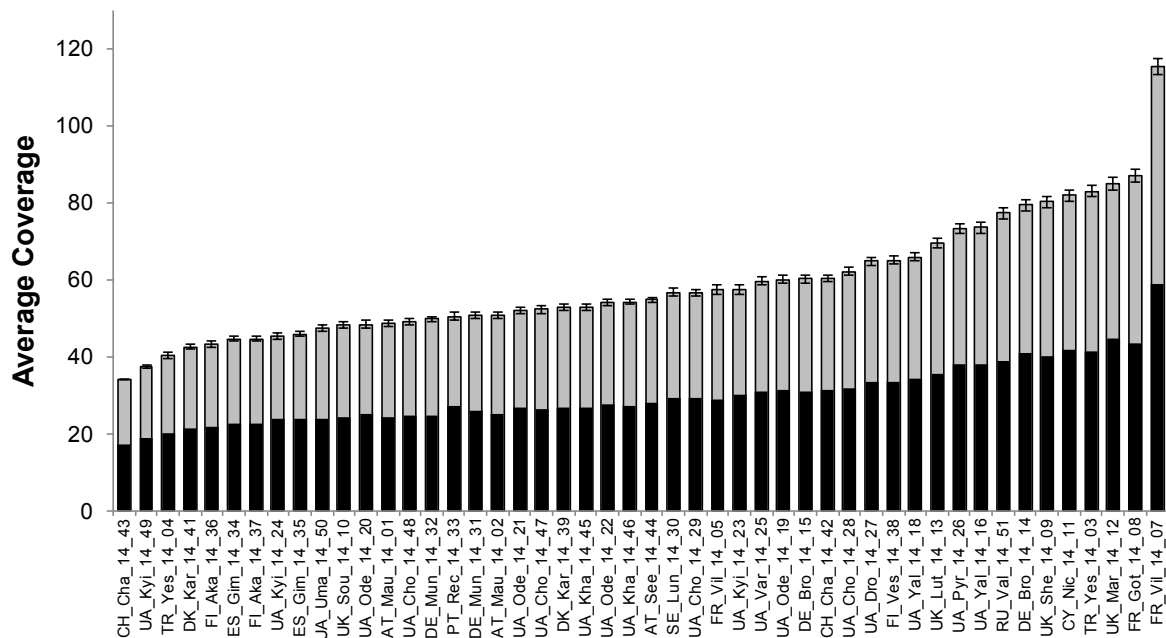

236

237 **Figure 4. Chromosome-wide average coverages.** Barplot showing the distribution of chromosome-wide coverages for  
238 X-chromosomes (black) and autosomes (grey). The error bars represent the standard deviation of coverages across all  
239 autosomal arms (2L, 2R, 3L, 3R).

240

241 Using this high-quality dataset, we performed the first comprehensive, continent-wide  
242 genomic analysis of European *D. melanogaster* populations (Figure 3). In addition to  
243 nuclear SNPs, we also investigated variation in mtDNA, TE insertions, chromosomal

244 inversion polymorphisms, and the *Drosophila*-associated microbiome (Figure 3).

245

### 246 **Most SNPs are widespread throughout Europe**

247 We identified a total of 5,558,241 “high confidence” SNPs with frequencies > 0.1% across  
248 all 48 samples (Figure 3B, Table S1 and S2). Of these, 17% (941,080) were shared  
249 among all samples, whereas 62% were polymorphic in fewer than 50% of the samples  
250 (Figure 5A).

251

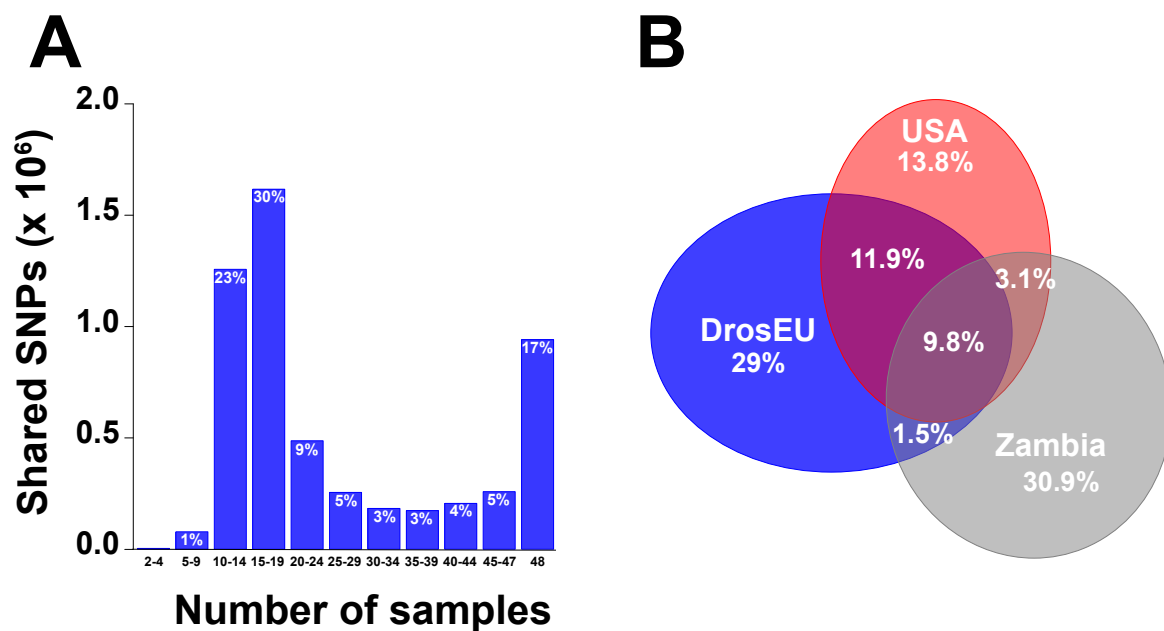

252

253 **Figure 5 with 2 supplements. SNP sharing.** (A) Shared SNPs among *DrosEU* samples. Number and proportion of  
254 SNPs in different samples, ranging from one specific sample to being shared among all 48 samples. (B) Shared SNPs  
255 among three worldwide populations. Elliptic Venn diagram showing the number and proportion of SNPs overlapping  
256 among the 5,361,256 biallelic SNPs in *DrosEU* (Europe), 3,953,804 biallelic SNPs in *DGRP* (North America) and  
257 4,643,511 biallelic SNPs in Zambia (Africa) populations.

258

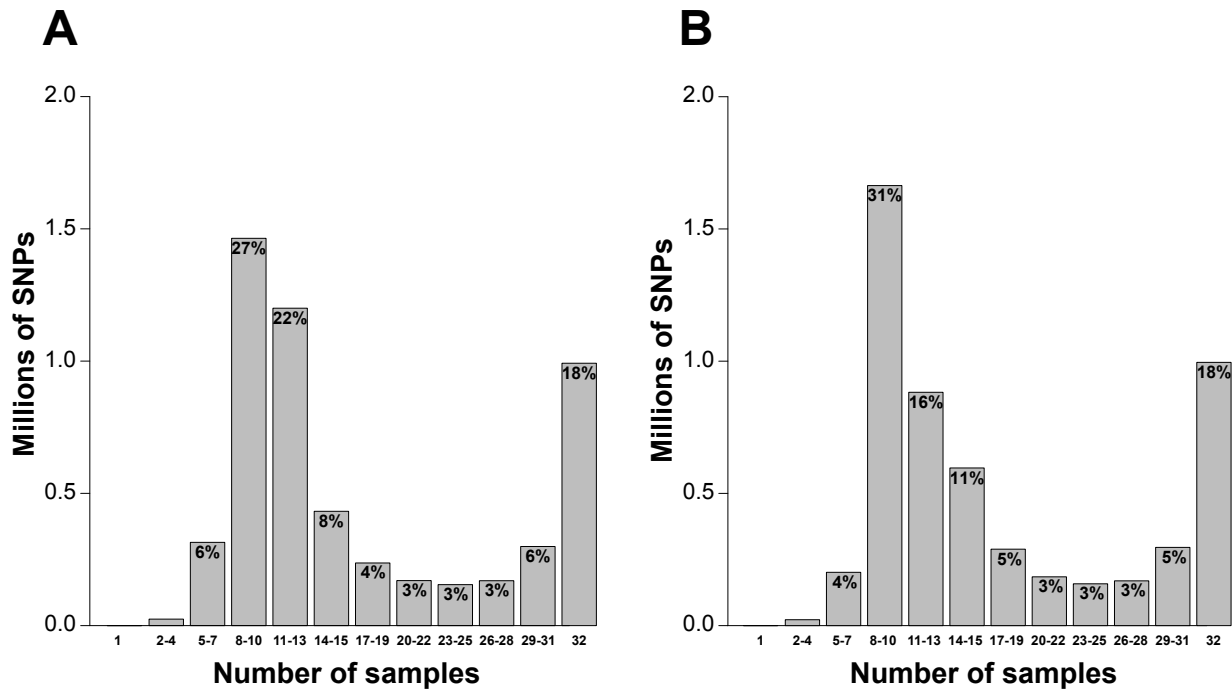

259

260

261

262

263

264

**Figure 5 - figure supplement 1. SNP sharing among *DrosEU* samples.** Number and proportion of SNPs in different 33 samples, each from one location. In the locations with more than one sample we took (A) the earliest sample or (B) the latest of the season.

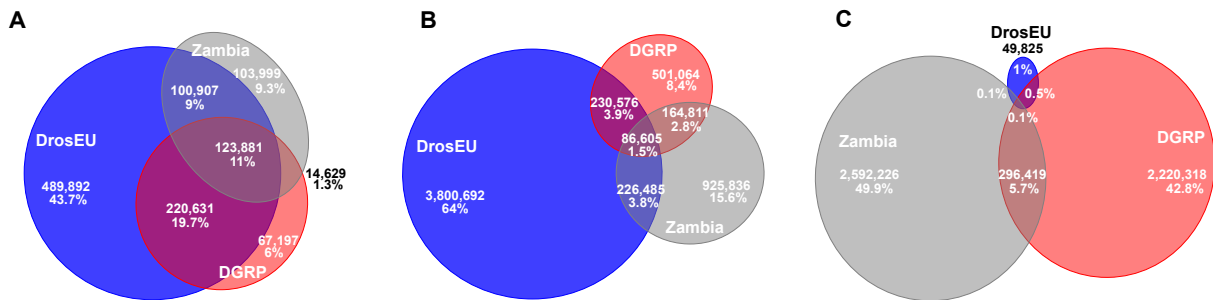

265

266

267

268

269

270

**Figure 5 - figure supplement 2. SNP sharing with other populations by frequency bins.** Elliptic Venn-diagram showing the proportion of SNPs shared and specific to each population, *DrosEU* (Europe), *DGRP* (North America) and Zambia (Africa) for different frequency bins: (A) frequency  $\geq 0.5$ , (B) frequency  $\geq 0.1$  and  $< 0.5$  and (C) frequency  $< 0.1$ . For proportions  $< 1\%$ , the number of SNPs is not depicted; *DrosEU*-Zambia: 4,088 SNPs, *DrosEU*-*DGRP*: 24,049 SNPs, *DrosEU*-*DGRP*-Zambia: 3,627 SNPs.

271

272 Due to our filtering scheme, SNPs that are private or nearly private to a sample will be  
273 recovered only if they are at a substantial frequency in that sample (~5%). In fact, only a  
274 small proportion of SNPs (1% = 3,645) was found in fewer than 10% of the samples, and  
275 only 0.004% (210) were specific to a single sample (Figure 5A). To avoid an excess  
276 contribution of SNPs from populations with multiple (seasonal) sampling, we repeated the  
277 analysis by considering only the earliest (Figure 5 - figure supplement 1A) or the latest  
278 (Figure 5 - figure supplement 1B) sample from populations with seasonal data. We  
279 observed similar patterns across the three analyses: (i) a very small number of sample-  
280 specific, private SNPs (210, 527 and 455, respectively), (ii) a majority of SNPs shared  
281 among 20% to 40% of the samples (53%, 52% and 52%, respectively), and (iii) a  
282 substantial proportion shared among all samples (17%, 20% and 19%, respectively; Figure  
283 5A and Figure 5 - figure supplement 1). These results suggest that most SNPs are  
284 geographically widespread in Europe and that genetic differentiation among populations is  
285 moderate, consistent with high levels of gene flow across the European continent.

286

287 **Derived European and North American populations share more SNPs with each**  
288 **other than they do with an ancestral African population**

289 *D. melanogaster* originated in sub-Saharan Africa, migrated to Europe ~10,000-15,000  
290 years ago, and subsequently colonized the rest of the world, including North America and  
291 Australia ~150 years ago (Lachaise *et al.* 1988; David & Capy 1988; Keller 2007). To  
292 search for genetic signatures of this shared history, we investigated the amount of allele  
293 sharing between African, European, and North American populations. We compared our  
294 SNP set to two published datasets, one from Zambia in sub-Saharan Africa (*DPGP3*; Lack  
295 *et al.* 2015) and one from North Carolina in North America (*DGRP*; Huang *et al.* 2014).



296 Populations from Zambia inhabit the ancestral geographical range of *D. melanogaster*  
297 (Pool *et al.* 2012; Lack *et al.* 2015); North American populations are thought to be derived  
298 from European populations, with some degree of admixture from African populations,  
299 particularly in the southern United States and the Caribbean (Caracristi & Schlötterer  
300 2003; Yukilevich & True 2008a; b; Yukilevich *et al.* 2010; Duchon *et al.* 2013; Kao *et al.*  
301 2015; Pool 2015; Bergland *et al.* 2016). The population from North Carolina exhibits  
302 primarily European ancestry, with ~15% admixture from Africa (Bergland *et al.* 2016).  
303  
304 Approximately 10% of the SNPs (~1 million) were shared among all three datasets (Figure  
305 5B). Since the out-of-Africa range expansion and the subsequent colonization of the North  
306 America continent by European (and to a lesser degree African) ancestors was likely  
307 accompanied by founder effects, leading to a loss of African alleles, and adaptation to  
308 temperate climates (Mettler *et al.* 1977), we predicted that a relatively high proportion of  
309 SNPs would be shared between Europe and North America. As expected, the proportion  
310 of shared SNPs was higher between Europe and North America (22%) than between  
311 either Europe or North America and Zambia (11% and 13%, respectively; Figure 5B).  
312 When we analyzed SNPs in variant frequency bins, the proportion of SNPs shared across  
313 at least two continents increased from 26% to 41% for SNPs, with variant frequencies  
314 larger than 50% (Figure 5 - figure supplement 2A). In contrast, only 6% of the SNPs at low  
315 frequency (<10%; Figure 5 - figure supplement 2C) were shared. These results are  
316 consistent with the loss of low-frequency variants during the colonization of the European  
317 continent; they suggest that intermediate frequency alleles are more likely to be ancestral  
318 and thus shared across broad geographic scales. Interestingly, as compared to Africa and  
319 North America, we identified nearly 3 million private SNPs that are specific to Europe  
320 (Figure 5B). Given that North American and Australian populations are – at least partly – of

321 European ancestry (see Lemeunier & Aulard 1992 for more details), future analysis of our  
322 data may be able to shed light on the demography and adaptation of these derived  
323 populations.

324

### 325 **European and other derived populations exhibit similar amounts of genetic variation**

326 Next, we estimated genome-wide levels of nucleotide diversity within the European  
327 population samples using population genetic summary statistics. Pairwise nucleotide  
328 diversity ( $\pi$  and Watterson's  $\theta$ ), corrected for pooling (Stalker 1976; Mettler *et al.* 1977;  
329 Voelker *et al.* 1978; Stalker 1980; Sezgin *et al.* 2004), ranged from 0.0047 to 0.0057 and  
330 from 0.0045 to 0.0064, respectively (Figure 6 and Figure 7), with our estimates being  
331 qualitatively similar to those from non-African *D. melanogaster* populations sequenced as  
332 individuals (Knibb *et al.* 1981; Knibb 1982; Anderson *et al.* 1987) or as pools (Inoue &  
333 Watanabe 1979; Inoue *et al.* 1984).

334

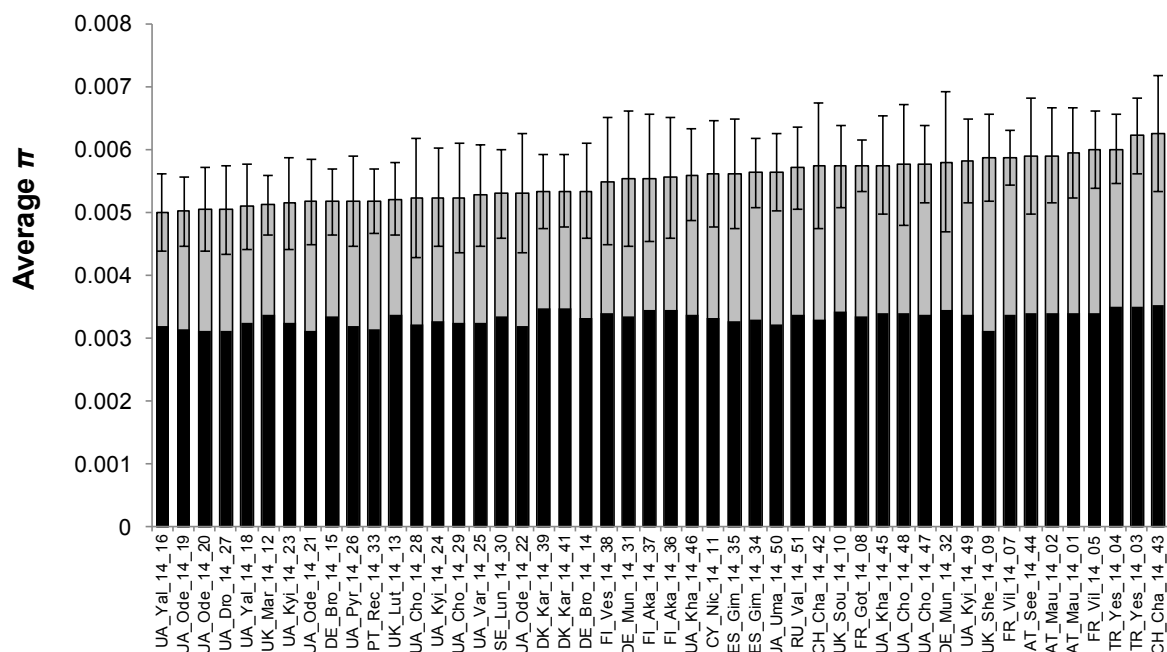

335

336 **Figure 6. Chromosome-wide average Tajima's  $\pi$ .** Barplot showing the distribution of chromosome-wide estimates of

337 Tajima's  $\pi$  for *X-chromosomes* (black) and autosomes (grey). The error bars represent the standard deviation of  $\pi$   
338 across all autosomal arms (*2L*, *2R*, *3L*, *3R*).

339

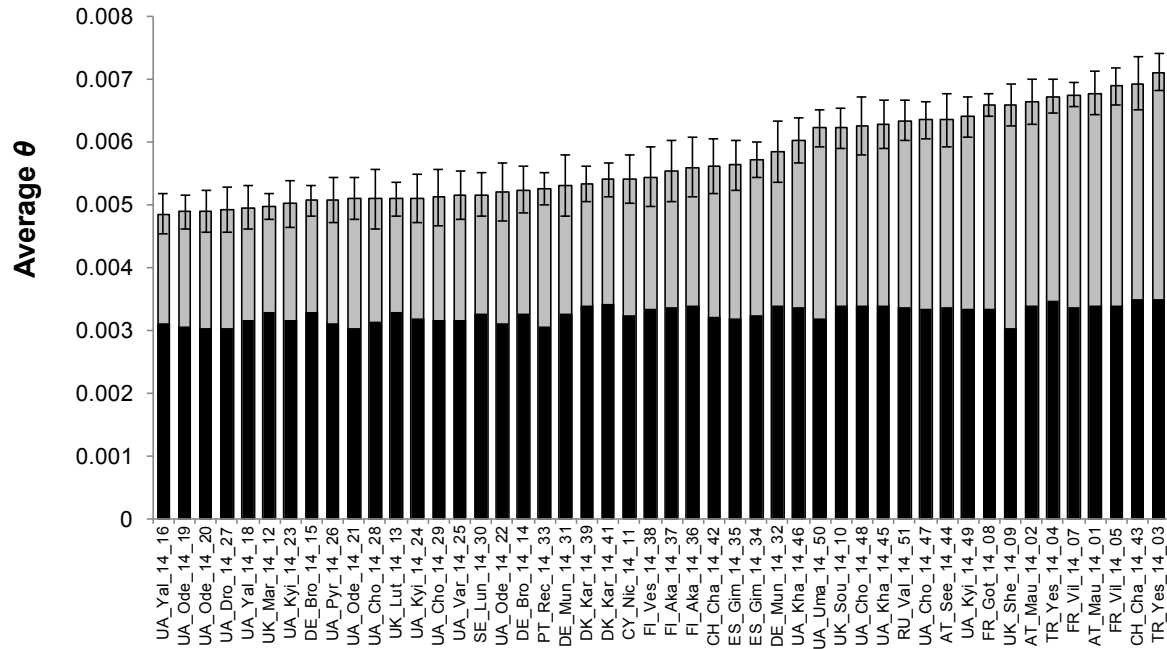

340

341 **Figure 7. Chromosome-wide average Watterson's  $\theta$ .** Barplot showing the distribution of chromosome-wide estimates  
342 of Watterson's  $\theta$  for *X-chromosomes* (black) and autosomes (grey). The error bars represent the standard deviation of  $\theta$   
343 across all autosomal arms (*2L*, *2R*, *3L*, *3R*).

344

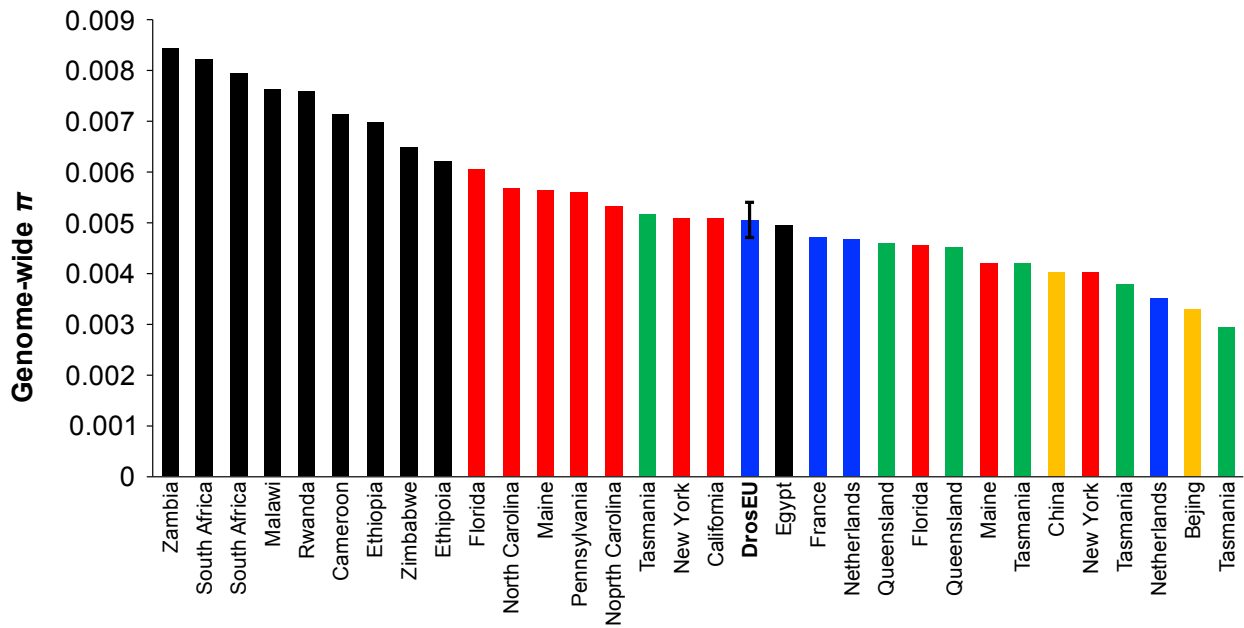

345

346 **Figure 8. Genetic variation in worldwide samples.** Barplot showing the distribution of genome-wide estimates of  
347 Tajima's  $\pi$  of the *DrosEU* and other genomic datasets (see Materials and Methods for more details) The error bars in the  
348 *DrosEU* dataset represent the standard deviation of  $\pi$  across all 48 population samples.

349

350 Estimates of  $\pi$  were slightly lower than, but in close agreement with, estimates of  $\theta$ ,  
351 leading to a slightly negative average of Tajima's  $D$  (Das & Singh 1990; 1991; Singh & Das  
352 1992; Singh 2018). Due to our SNP calling approach (see Materials and Methods), we  
353 found a deficiency of alleles with frequencies  $\leq 0.01$ , both in the sample-wise site  
354 frequency spectra (SFS) as well as in the combined SFS by SNP type, with the sample-  
355 wise SFS being skewed towards low frequency variants (Figure 9A).

356

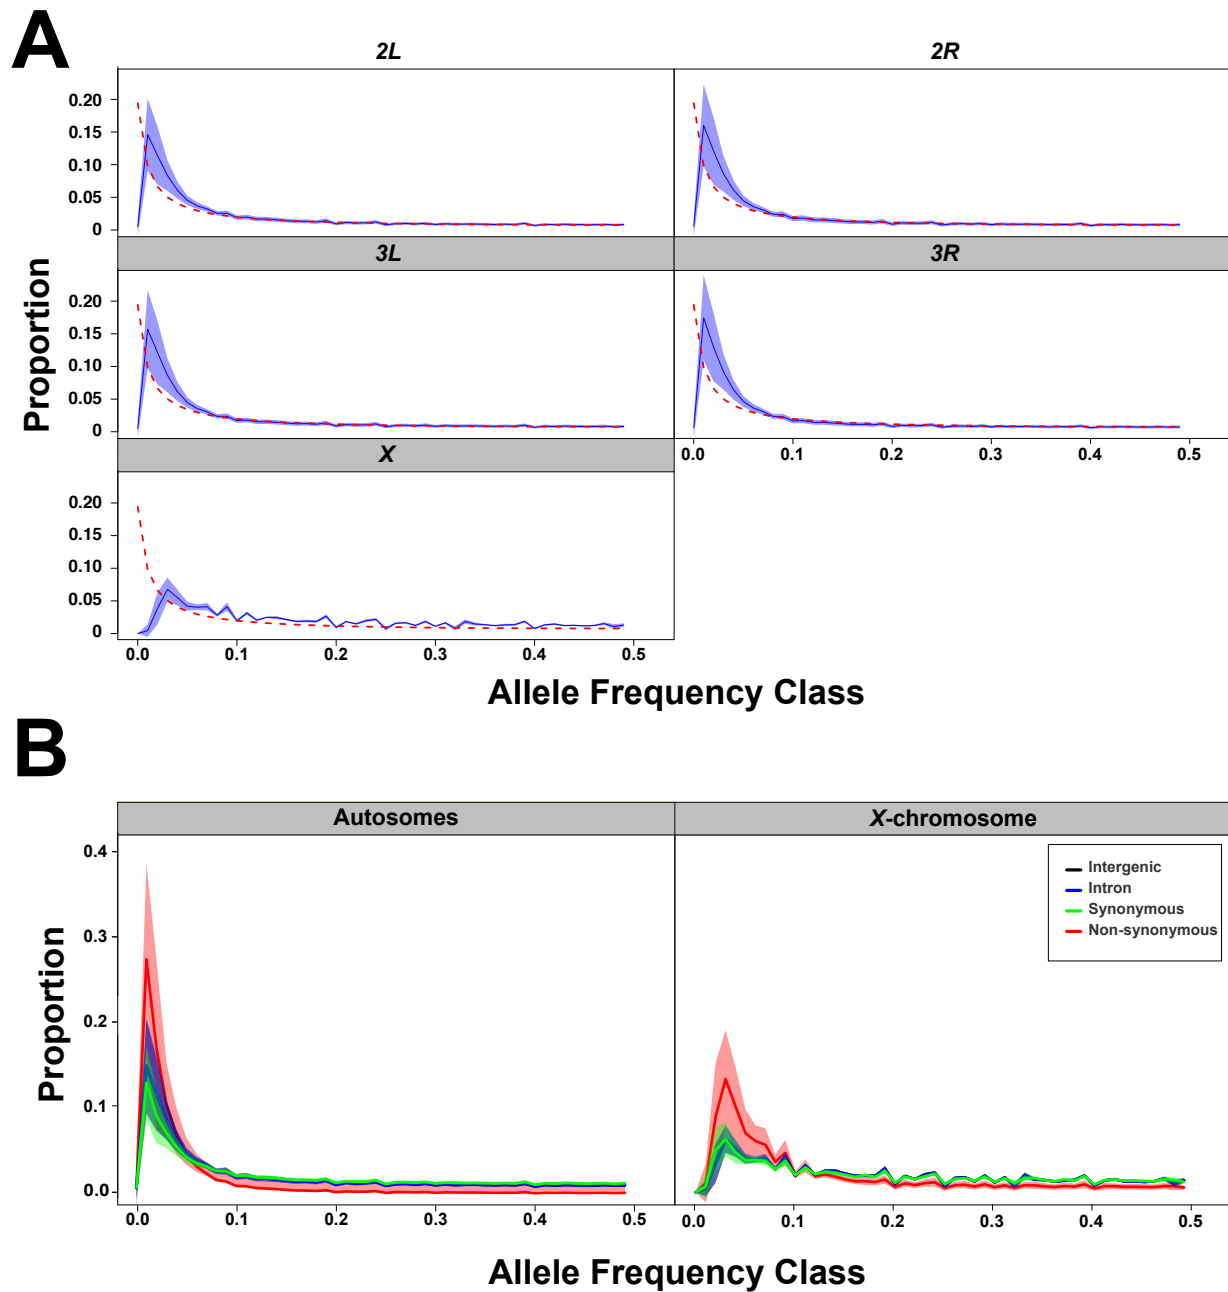

357

358 **Figure 9. Site frequency spectra (SFS).** (A) Chromosome-wise SFS: The five panels show the means (dark blue line)  
359 and standard deviations (light blue area) of the folded SFS across all 48 samples. The red dashed line indicates the  
360 expected SFS based on a  $\theta$  of  $10^{-4}$ . (B) SFS by SNP type: The two panels show the means (dark line) and standard  
361 deviations (light area) of the folded SFS for different SNP types (intergenic, intronic, non-synonymous and synonymous),  
362 combining SNPs across the autosomes (left) and the X-chromosome (right).

363

364 In addition, we observed an excess of low-frequency SNPs at non-synonymous sites as  
365 compared to other types of sites, which is consistent with purifying selection eliminating

366 deleterious non-synonymous mutations (Endler 1977).

367 Overall, we detected only minor differences in the amount of genetic variation among  
368 populations. Specifically, genome-wide  $\pi$  ranged from 0.005 (Yalta, Ukraine) to 0.006  
369 (Chalet à Gobet, Switzerland) for autosomes, and from 0.003 (Odesa, Ukraine) to 0.0035  
370 (Chalet à Gobet, Switzerland) for the *X* chromosome (Table S1 and Figure 6). When  
371 testing for associations between geographic variables and genome-wide average levels of  
372 genetic variation, we found that both  $\pi$  and  $\theta$  were strongly negatively correlated with  
373 altitude, but neither was correlated with latitude or longitude (Table 2). There were no  
374 correlations between the season in which the samples were collected and levels of  
375 average genome-wide genetic variation as measured by  $\pi$  and  $\theta$  (Table 2).

376

377 The *X* chromosome showed markedly lower genetic variation than the autosomes, with the  
378 ratio of *X*-linked to autosomal variation ( $\pi_X/\pi_A$ ) ranging from 0.53 to 0.66. These values  
379 are well below the ratio of 0.75 (one-sample Wilcoxon rank test,  $p < 0.001$ ) expected under  
380 standard neutrality and equal sex ratio, but are consistent with previous findings for  
381 European populations of *D. melanogaster* and can be attributed to either selection (Knibb  
382 *et al.* 1981) or changes in population size (Knibb *et al.* 1981). This pattern is consistent  
383 with previous estimates of relatively low *X*-linked diversity for European (Kapun *et al.*  
384 2014) and other non-African populations (Kapun *et al.* 2016a). Interestingly, the ratio  $\pi_X/\pi_A$   
385 was significantly, albeit weakly, positively correlated with latitude (Spearman's  $r = 0.315$ ,  $p$   
386  $= 0.0289$ ), with northern populations having slightly higher *X/A* ratios than southern  
387 populations. This is at odds with the prediction of periodically bottlenecked populations  
388 leading to a lower *X/A* ratio in the north and perhaps reflects more complex demographic  
389 scenarios (Mettler *et al.* 1977; Voelker *et al.* 1978; Knibb *et al.* 1981; Knibb 1982; Das &  
390 Singh 1991; Van 't Land *et al.* 2000; de Jong & Bochdanovits 2003; Anderson *et al.* 2005;

391 Umina *et al.* 2005; Rako *et al.* 2006; Kapun *et al.* 2014; 2016a).

392

393 In contrast to  $\pi$  and  $\theta$ , we observed major differences in the genome-wide averages of

394 Tajima's  $D$  among samples (Figure 10).

395

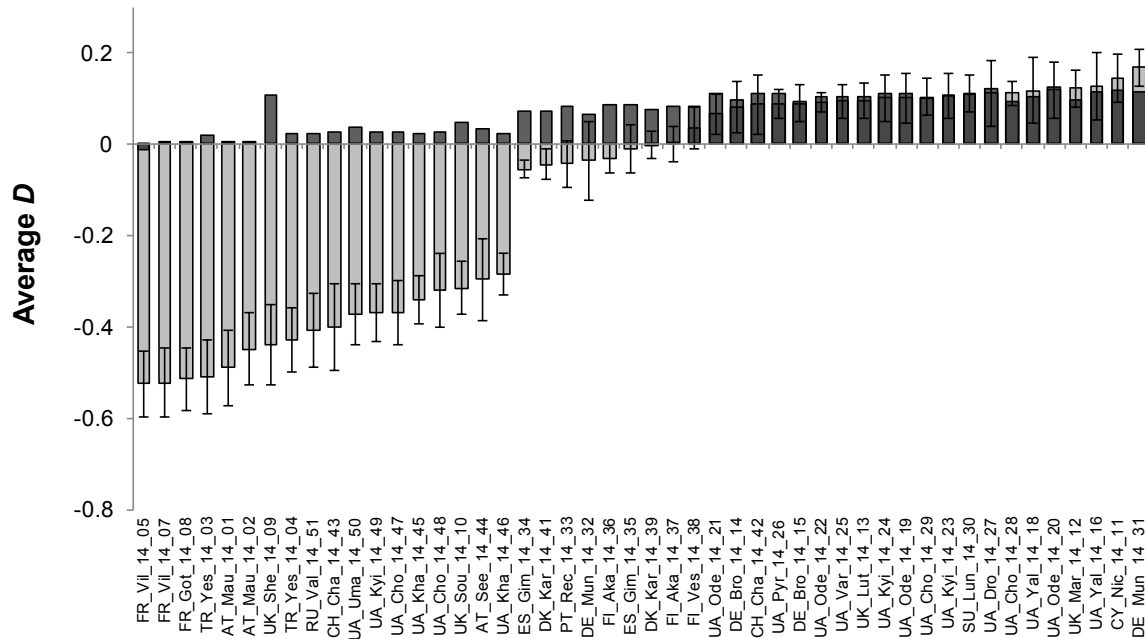

396

397 **Figure 10. Chromosome-wide average Tajima's  $D$ .** Barplot showing the distribution of chromosome-wide estimates of  
398 Tajima's  $D$  for X-chromosomes (black) and autosomes (grey). The error bars represent the standard deviation of  $D$   
399 across all autosomal arms (2L, 2R, 3L, 3R).

400

401 The chromosome-wide Tajima's  $D$  was negative in approximately half of all samples and  
402 close to zero or slightly positive in the remaining samples, possibly due to heterogeneity in  
403 the proportion of sequencing errors among the multiplexed sequencing runs. However,  
404 models that included sequence run as a covariate did not explain more of the observed  
405 variance than models without the covariate, suggesting that associations of  $\pi$  and  $\theta$  with  
406 geographic variables were not confounded by sequencing heterogeneity (see Supporting

407 Information; Table S4). Moreover, our results for  $\pi$ ,  $\theta$  and  $D$  are unlikely to be confounded  
408 by spatio-temporal autocorrelations: after accounting for similarity among spatial neighbors  
409 (Moran's  $I \approx 0$ ,  $p > 0.05$  for all tests), there were no significant residual autocorrelations  
410 among samples for these estimators.

411

412 Genetic variation was not distributed homogeneously across the genome. Both  $\pi$  and  $\theta$   
413 were markedly reduced close to centromeric and telomeric regions (Figure 11), which is in  
414 good agreement with previous studies reporting systematic reductions in genetic variation  
415 in regions with reduced recombination (Kennison 2008).

416

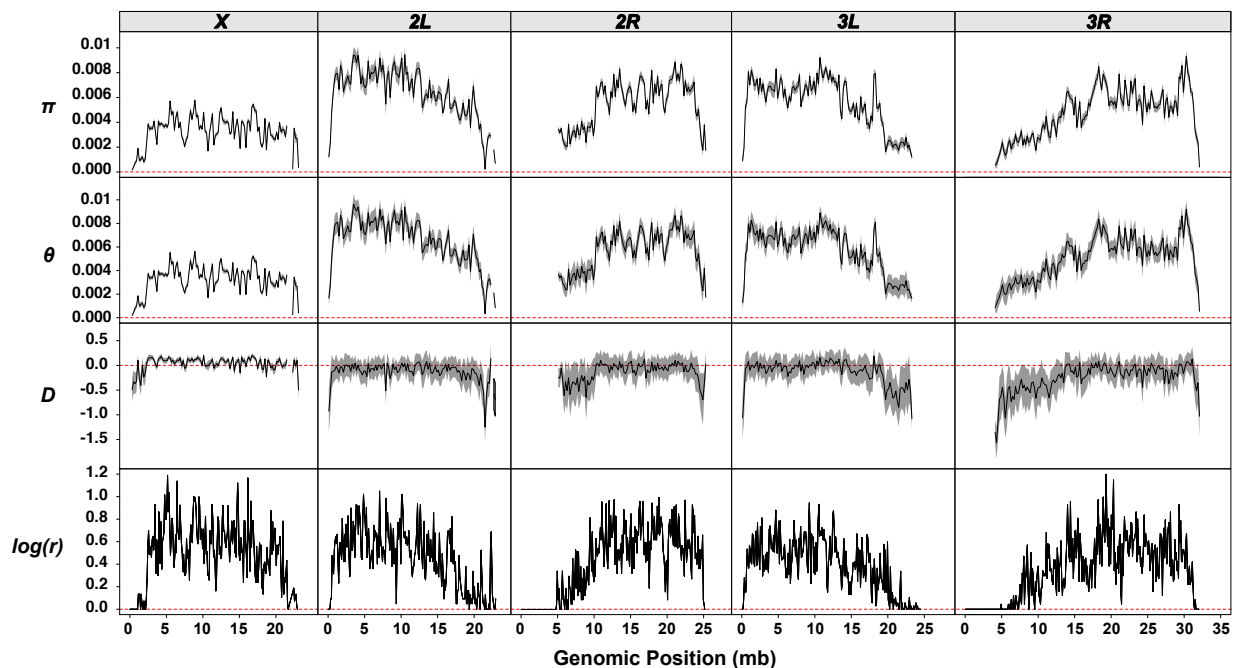

417

418 **Figure 11 with 1 supplement. Genome-wide estimates of genetic diversity and recombination rates.** The distribution  
419 of Tajima's  $\pi$ , Watterson's  $\theta$  and Tajima's  $D$  (from top to bottom) in 200 kb non-overlapping windows plotted for each  
420 chromosomal arm separately. Bold black lines depict statistics which were averaged across all 48 samples and the  
421 upper and lower grey area show the corresponding standard deviations for each window. Red dashed lines highlight the  
422 vertical position of a zero value. The bottom row shows log-transformed recombination rates ( $r$ ) in 100kb non-overlapping  
423 windows as obtained from Comeron et al. (2010).



424

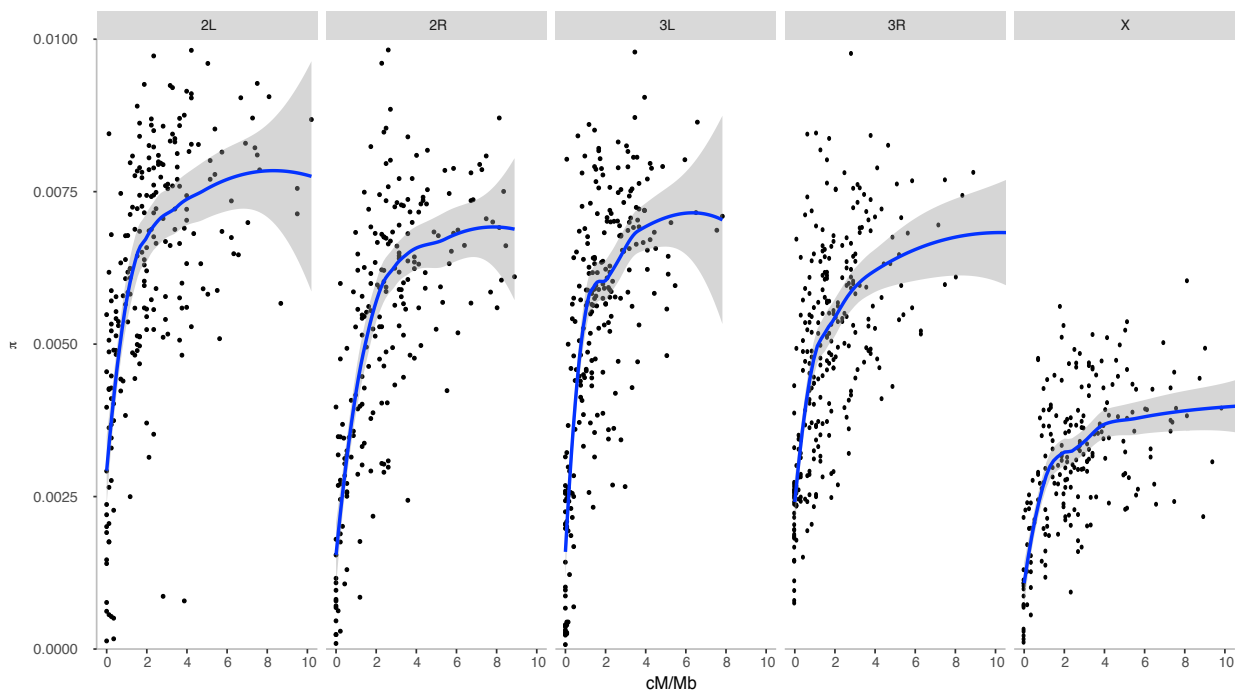

425

426 **Figure 11 - figure supplement 1. Correlation between recombination and genetic diversity.** Smooth local  
427 regression (LOESS) between Comeron *et al.* (2012) recombination rate in cM/Mb and the average of the 48 samples  
428 genetic diversity ( $\pi$ ) in 100kb non-overlapping windows by chromosome arm.

429

430 Consistent with this, we detected strong correlations with estimates of recombination rates  
431 based on the data of Comeron *et al.* (2012) (linear regression,  $p < 0.001$ ; not accounting  
432 for autocorrelation), suggesting that the distribution of genome-wide genetic variation is  
433 strongly influenced by the recombination landscape (Table S5). For autosomes, fine-scale  
434 recombination rates explained 41-47% of the variation in  $\pi$ , whereas broad-scale  
435 recombination rates (Roberts 1998; Pimpinelli *et al.* 2010) explained 50-56% of the  
436 variation in diversity. We obtained similar results for X-chromosomes, with recombination  
437 rates explaining 31-38% (Dobzhansky & Sturtevant 1938; Kunze-Mühl & Müller 1957;  
438 Ashburner & Lemeunier 1976) or 24-33% (Wesley & Eanes 1994; Andolfatto *et al.* 1999;  
439 Matzkin *et al.* 2005; Corbett-Detig *et al.* 2012) of the variation (Figure 11, Table S5, Figure

440 11 - figure supplement 1).

441

442 We also observed variation in Tajima's  $D$  with respect to genomic position (Figure 11).

443 Notably, Tajima's  $D$  was markedly lower than the corresponding chromosome-wide

444 average in the proximity of telomeric and centromeric regions on all chromosomal arms.

445 These patterns possibly reflect purifying selection or selective sweeps close to

446 heterochromatic regions (Navarro & Faria 2014; Kapun *et al.* 2014; 2016a), or might

447 alternatively be a result of sequencing errors having a stronger effect on the SFS in low

448 SNP density regions.

449

#### 450 **Localized reductions in Tajima's $D$ are consistent with selective sweeps**

451 We identified 144 genomic locations on the autosomes with non-zero recombination,

452 reduced genetic variation, and a local reduction in Tajima's  $D$  (see Methods, Table S6),

453 which jointly may be indicative of selective sweeps. Although we cannot rule out that these

454 patterns are the result of non-selective demographic effects (e.g., bottlenecks), two

455 observations suggest that at least some of these regions are affected by positive selection.

456 First, bottlenecks are typically expected to cause genome-wide, non-localized reductions

457 in Tajima's  $D$ . Second, several of the genomic regions in our data coincide with previously

458 identified, well-supported selective sweeps in the proximity of *Hen1*, *Cyp6g1* (Andolfatto *et*

459 *al.* 1999; Corbett-Detig & Hartl 2012), *wapl* (Andolfatto *et al.* 1999; Matzkin *et al.* 2005;

460 Kennington *et al.* 2007; Corbett-Detig & Hartl 2012; Kennington & Hoffmann 2013; Kapun

461 *et al.* 2014; 2016a), *HDAC6* (Begun 2015; Lavington & Kern 2017), and around the

462 chimeric gene *CR18217* (Kirkpatrick 2010).

463

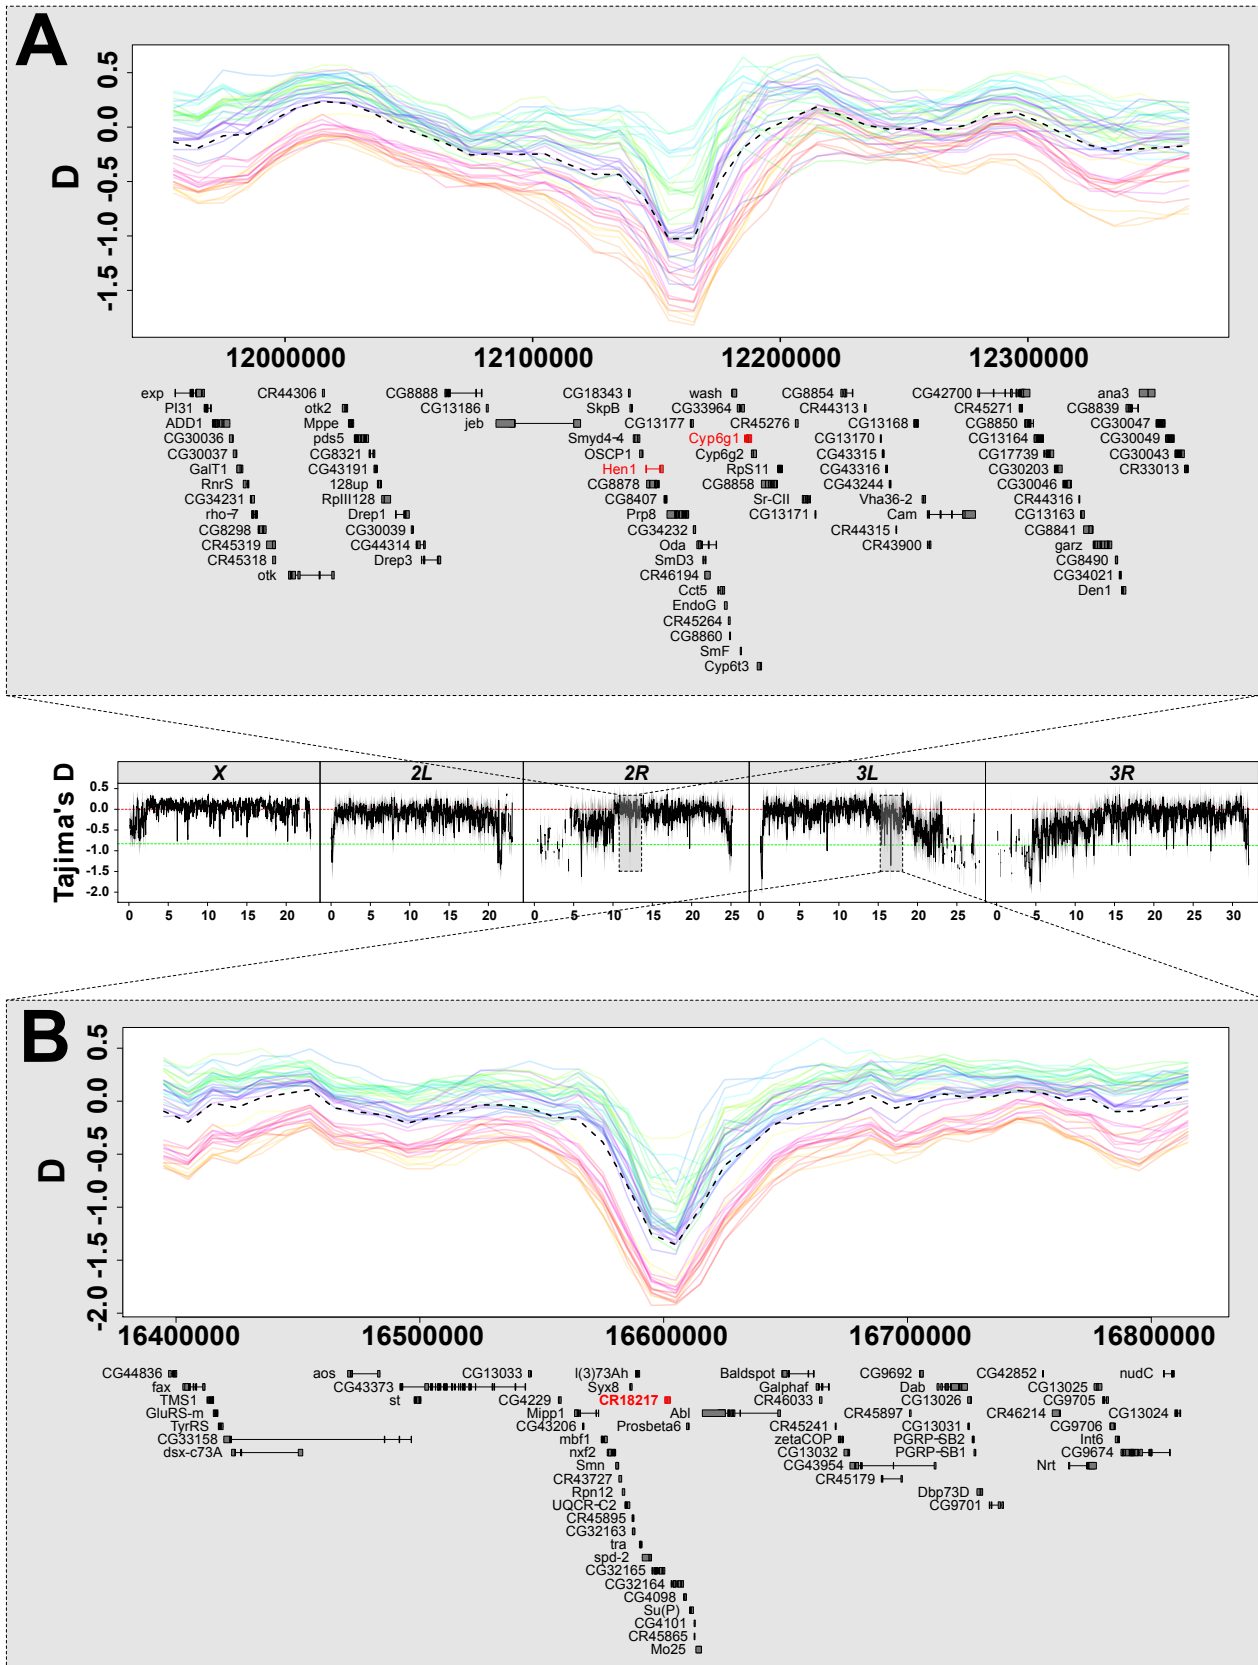

464

465

466

**Figure 12 with 3 supplements. Signals of selective sweeps.** The central figure shows the distribution of Tajima's  $D$  in 50 kb sliding windows with 40 kb overlap. The red and green dashed lines show Tajima's  $D = 0$  and Tajima's  $D = -1$ ,

467 respectively. The top panel magnifies a genomic region on chromosomal arm *2R* that harbors well-known candidate loci  
468 for pesticide resistance, *Cyp6g1* and *Hen1* (highlighted in red), where strong selection resulted in a selective sweep. This  
469 sweep is characterized by an excess of low-frequency SNP variants, indicated by an overall negative Tajima's *D* in all  
470 samples. The colored solid lines depict Tajima's *D* for each sample separately, whereas the black dashed line shows  
471 Tajima's *D* averaged across all samples. (A legend for the color codes of the samples can be found in the Supporting  
472 Information file in Figure 12 - figure supplement 3). The bottom figure shows a genomic region on *3L* which has not been  
473 previously identified as a potential target of selection but shows Tajima's *D* patterns similar to the top figure. Notably,  
474 both regions are also characterized by a strong reduction of genetic variation (Figure 12 - figure supplement 1).

475

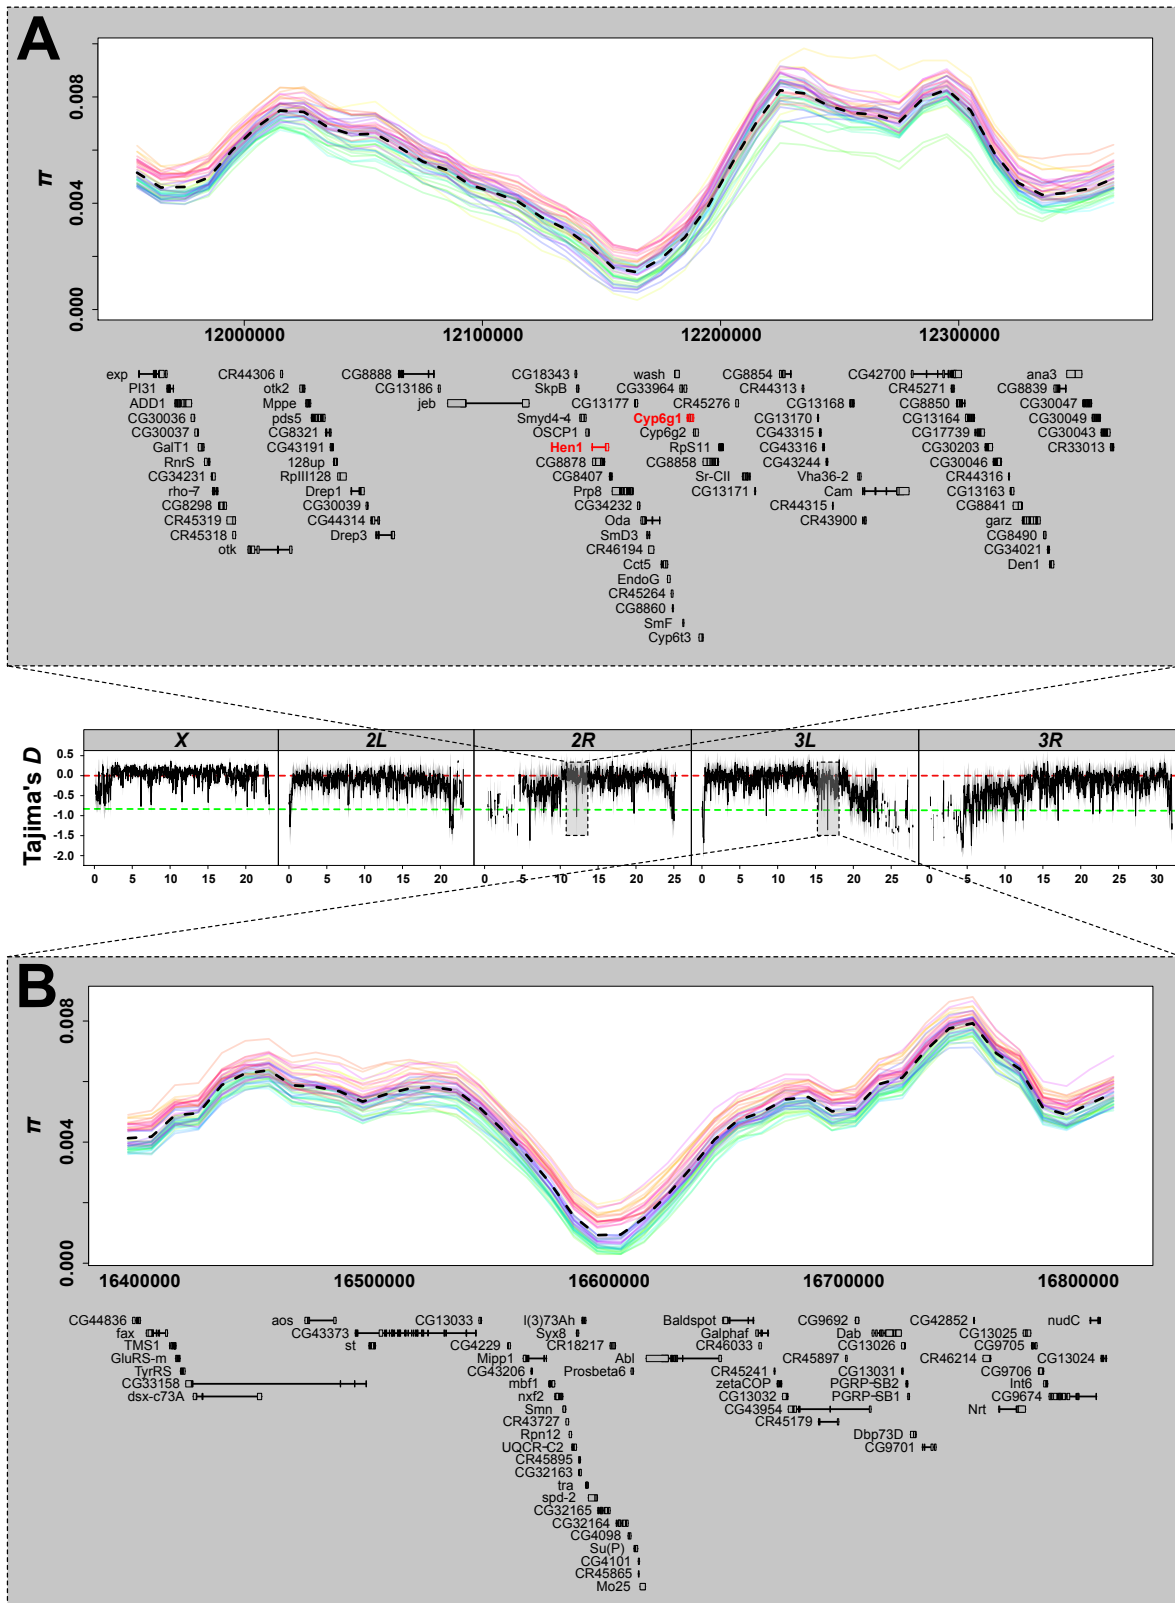

476

477 **Figure 12 - figure supplement 1: Genetic variation in regions of putative selective sweeps.** This figure is equivalent

478 to Figure 12 in the main text but shows the distribution of genetic variation ( $\pi$ ) in regions with depressed Tajima's  $D$

479 around the well-studied *Cyp6g1* locus (A) and a previously unknown candidate region on 3L (B). Similar to Tajima's  $D$ ,  $\pi$   
480 was calculated in 50 kb sliding windows with 40 kb overlap. See Table S6 for more examples. A legend for the color  
481 codes of the samples can be found in Figure 12 - figure supplement 3.

482

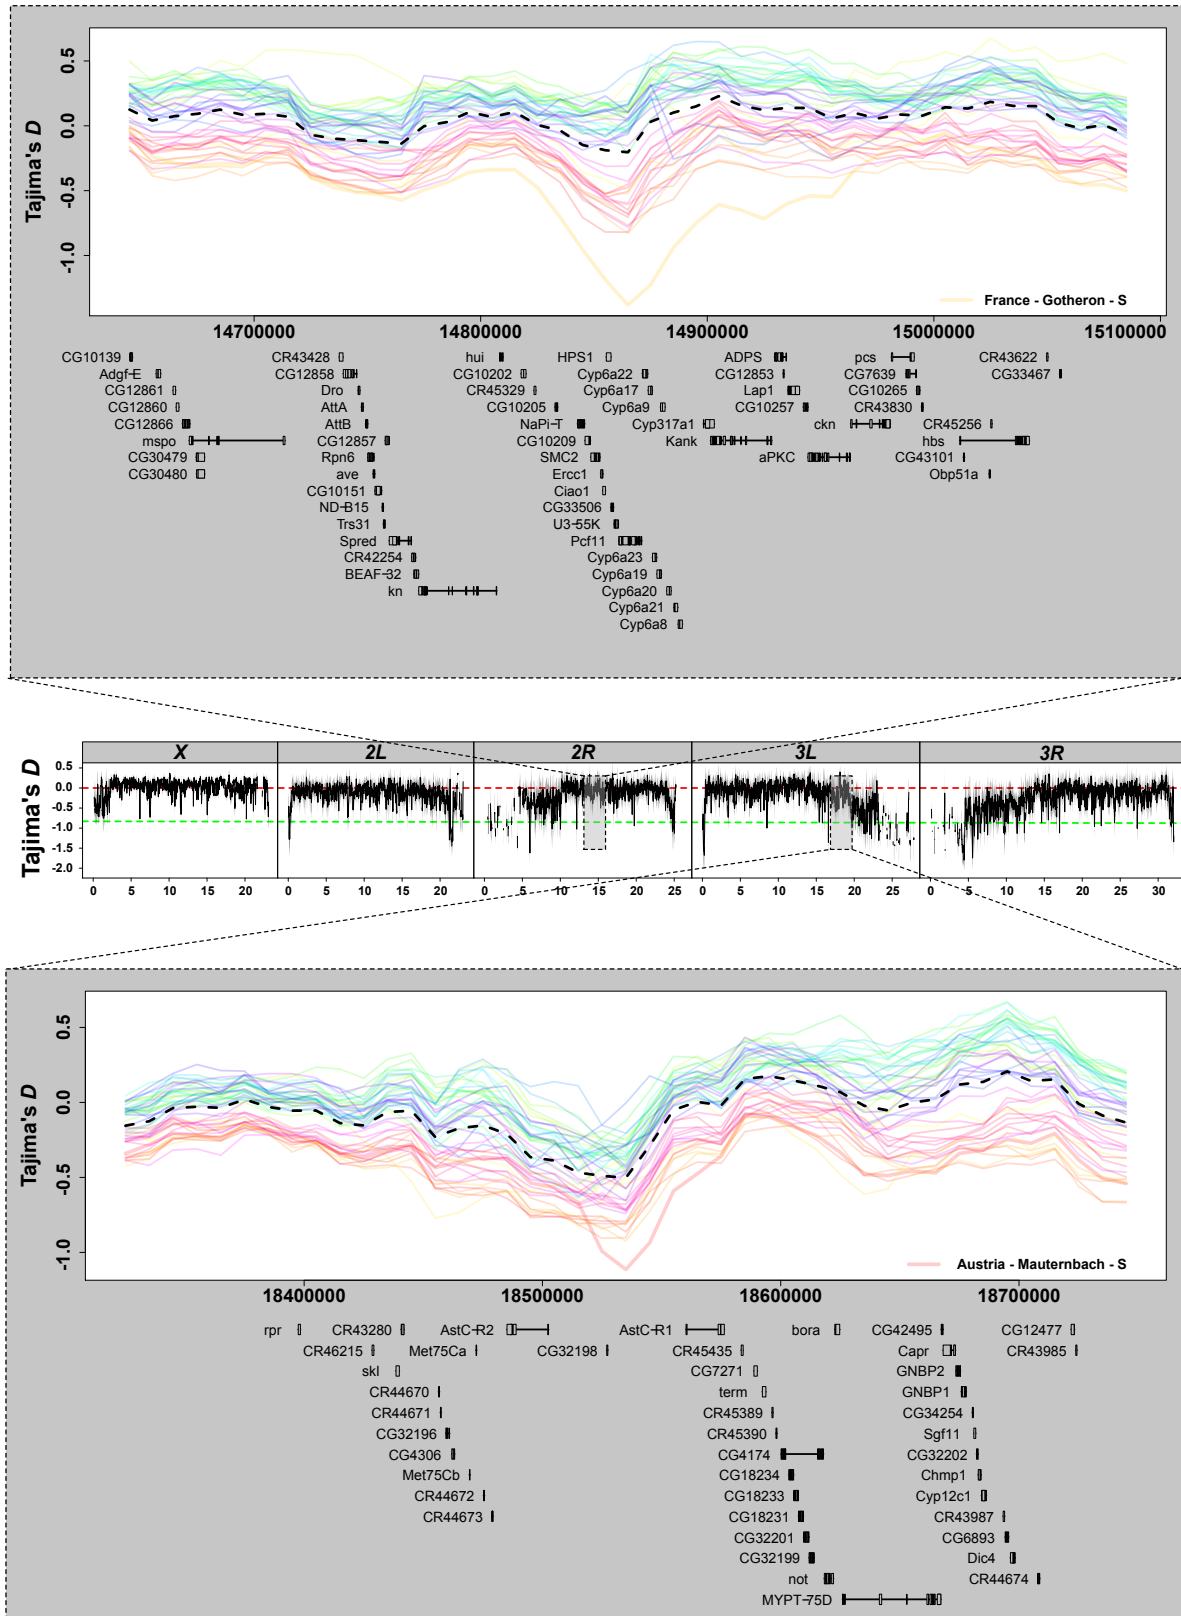

483

484

485

**Figure 12 - figure supplement 2. Signals of selective sweeps in local populations.** This figure is equivalent to Figure 12 in the main text but shows depressions in Tajima's  $D$  in single population samples. Such regions were identified by

486 enriching for samples with window-wise Tajima's  $D$  values  $< -0.9$ , which were smaller than 2 times the standard deviation  
487 of Tajima's  $D$  for all samples in the corresponding genomic region. The top and bottom panels show two such examples  
488 where samples with reduced Tajima's  $D$  are highlighted by thick lines and the corresponding sample names. See Table  
489 S6 for additional details. A legend for the color codes of the samples can be found in Figure 12 - figure supplement 3.

490

|                |                |                 |
|----------------|----------------|-----------------|
| ● AT_14_Mau_1  | ● UA_14_Ode_19 | ● ES_14_Lle_35  |
| ● AT_14_Mau_2  | ● UA_14_Ode_20 | ● FI_14_Aka_36  |
| ● TR_14_Yes_3  | ● UA_14_Ode_21 | ● FI_14_Aka_37  |
| ● TR_14_Yes_4  | ● UA_14_Ode_22 | ● FI_14_Ves_38  |
| ● FR_14_Vil_5  | ● UA_14_Kyi_23 | ● DK_14_Kar_39  |
| ● FR_14_Vil_7  | ● UA_14_Kyi_24 | ● DK_14_Kar_41  |
| ● FR_14_Got_8  | ● UA_14_Var_25 | ● CH_14_Cha_42  |
| ● UK_14_She_9  | ● UA_14_Pyr_26 | ● CH_14_Cha_43  |
| ● UK_14_Sou_10 | ● UA_14_Dro_27 | ● AT_14_See_44  |
| ● CY_14_Nic_11 | ● UA_14_Cho_28 | ● UA_14_Kha_45  |
| ● UK_14_Mar_12 | ● UA_14_Cho_29 | ● UA_14_Kha_46  |
| ● UK_14_Lut_13 | ● SE_14_Lun_30 | ● UA_14_Cho_47  |
| ● DE_14_Bro_14 | ● DE_14_Mun_31 | ● UA_14_Cho_48  |
| ● DE_14_Bro_15 | ● DE_14_Mun_32 | ● UA_14_Kyi_49  |
| ● UA_14_Yal_16 | ● PT_14_Rec_33 | ● UA_14_Uma_50  |
| ● UA_14_Yal_18 | ● ES_14_Lle_34 | ● RU_14_Vald_51 |

491

492 **Figure 12 - figure supplement 3.** Legend for color code in Figure 12, Figure 12 - figure supplement 1 and Figure 12 -  
493 figure supplement 2.

494

495 However, some regions, such as those around *wapl* or *HDAC6*, are characterized by low  
496 recombination rates ( $< 0.5$  cM/Mb; Table S5), which can itself lead to reduced variation  
497 and Tajima's  $D$  (see also Nolte *et al.* 2013). Our screen also uncovered several regions  
498 that have not previously been described as harboring sweeps (Table S6). These represent  
499 promising candidate regions containing putative targets of positive selection. For several of  
500 these candidate regions, patterns of variation were highly similar across the majority of  
501 European samples, suggesting the existence of continent-wide selective sweeps that  
502 either predate the colonization of Europe (e.g., Beisswanger *et al.* 2006) or that have



503 swept across all European populations more recently. In contrast, some candidate regions  
504 were restricted to only a few populations and characterized by highly negative values of  
505 Tajima's  $D$ , i.e. deviating from the among-population average by more than two standard  
506 deviations, thus possibly hinting at cases of local, population-specific adaptation (Figure 12  
507 - figure supplement 2 and Table S6 for examples).

508

### 509 **European populations are strongly structured along an east-west gradient**

510 We next investigated patterns of genetic differentiation due to demographic substructure.  
511 Overall, pairwise differentiation as measured by  $F_{ST}$  was relatively low, though markedly  
512 higher for  $X$ -chromosomes (0.043–0.076) than for autosomes (0.013–0.059; Student's  $t$ -  
513 test;  $p < 0.001$ ; Figure 13), possibly reflecting differences in effective population size  
514 between the  $X$  chromosome and the autosomes (Hutter *et al.* 2007). One population, from  
515 Sheffield (UK), showed an unusually high amount of differentiation on the  $X$ -chromosome  
516 as compared to other populations (Figure 13).

517

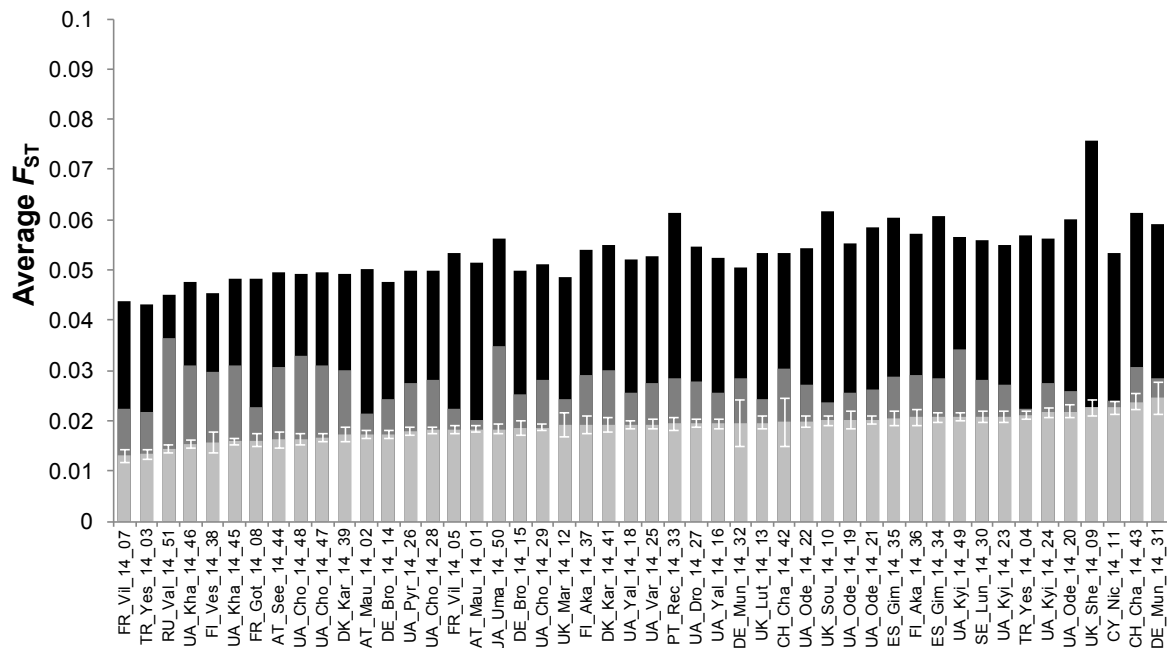

518

519 **Figure 13. Chromosome-wide average  $F_{ST}$ .** Bar-plot showing the distribution of chromosome-wide  $F_{ST}$  averaged  
520 across all possible pairwise comparisons for a given sample. The black bars show observed  $F_{ST}$  values and the dark  
521 grey bars expected  $F_{ST}$  values (based on autosomal values; see Materials and Methods) for the X chromosome. The  
522 light grey bars show autosomal  $F_{ST}$  values and error bars represent the standard deviation of average chromosome-wide  
523  $F_{ST}$  across all autosomal arms (2L, 2R, 3L, 3R).

524

525 Despite these overall low levels of among-population differentiation, European populations  
526 showed some evidence of geographic substructure. To analyze this pattern in more detail,  
527 we focused on a set of SNPs located in short introns (< 60 bp), as these sites are relatively  
528 unaffected by selection (Haddrill *et al.* 2005; Singh *et al.* 2009; Parsch *et al.* 2010;  
529 Clemente & Vogl 2012; Lawrie *et al.* 2013). We analyzed the extent of isolation by  
530 distance (IBD) within Europe by correlating genetic and geographic distance and using  
531 pairwise  $F_{ST}$  between populations as a measure of genetic isolation.  $F_{ST}$  was overall low  
532 but significantly correlated with distance across the continent, indicating weak but  
533 significant IBD (Mantel test;  $p < 0.001$ ; max.  $F_{ST} \sim 0.05$ ; Figure 14A). We also examined  
534 those populations that were most and least separated by genetic differentiation, estimated

535 by pairwise  $F_{ST}$  (Figure 14B). In general, longitude had a stronger effect on isolation than  
536 latitude, with populations showing the strongest differentiation separated along an east-  
537 west, rather than a north-south, axis (Figure 14B). This pattern remained unchanged when  
538 the number of populations sampled from Ukraine was reduced to avoid over-  
539 representation (Figure 14 - figure supplement 1).

540

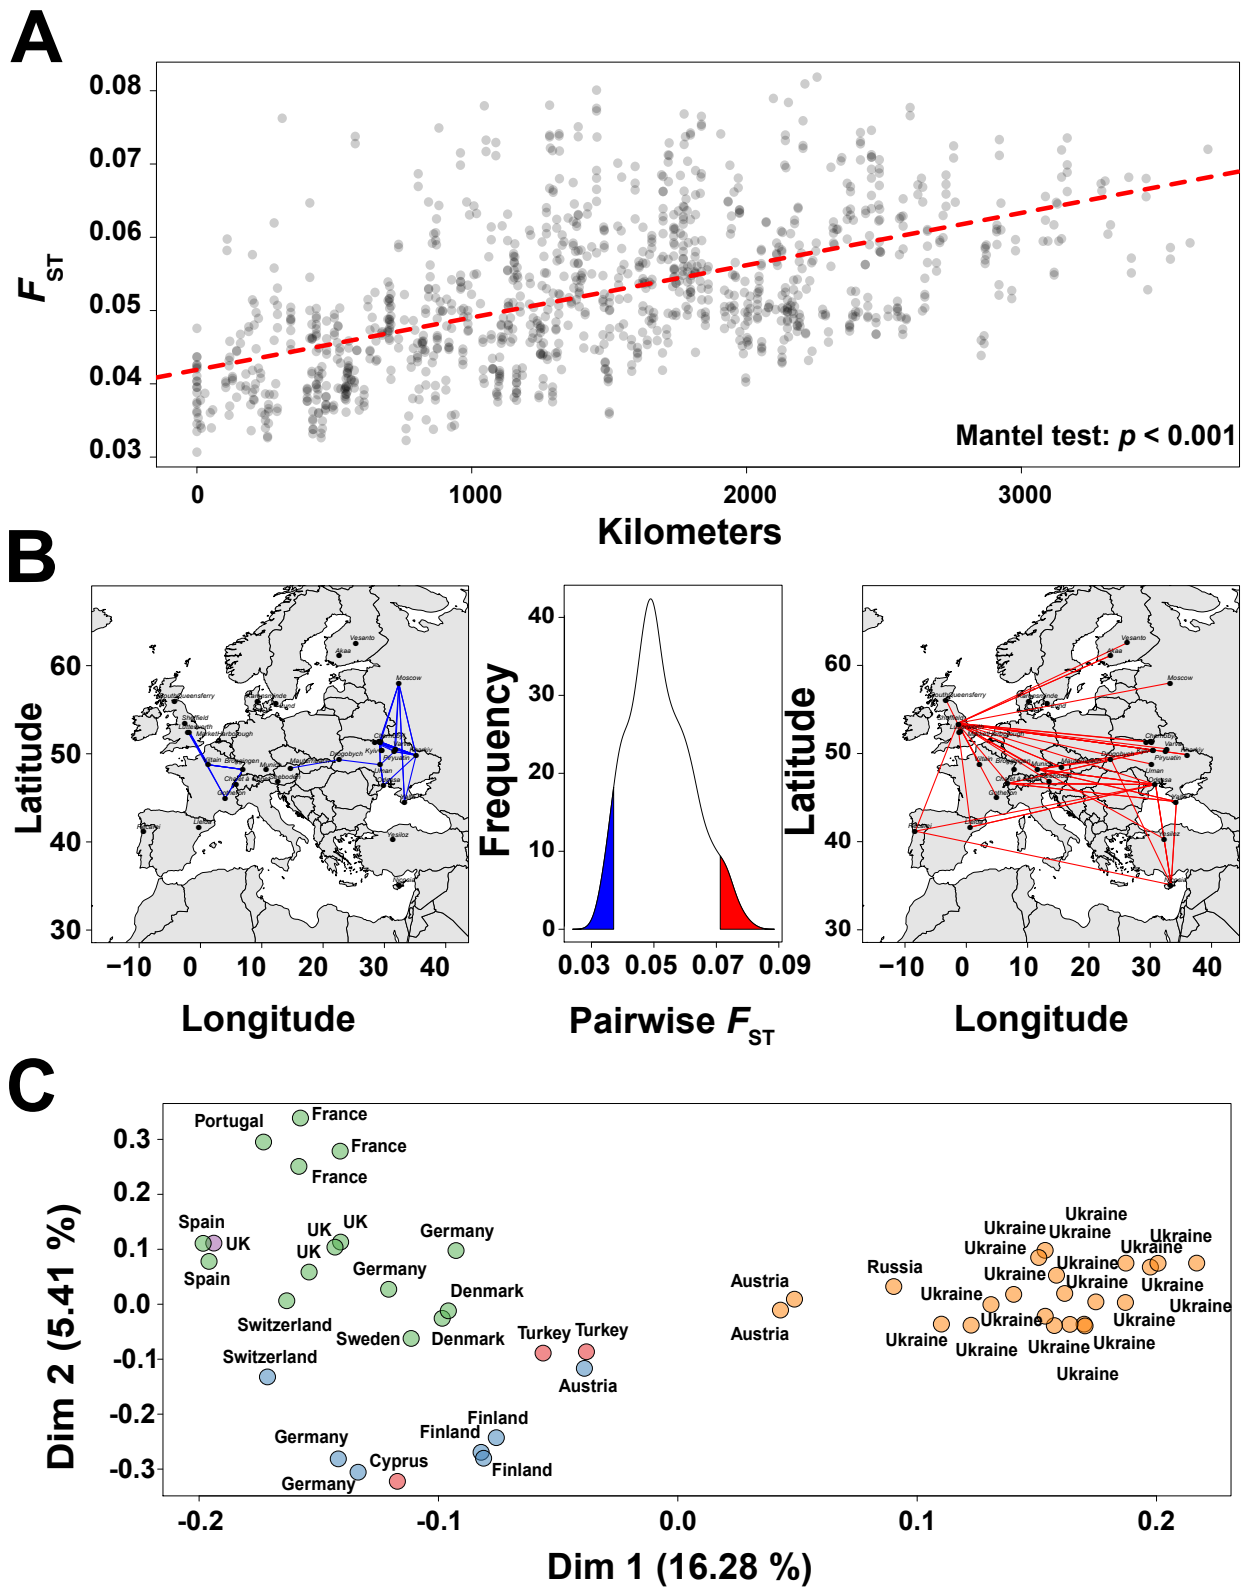

545 significance. (B) Average neutral  $F_{ST}$  among populations. The center plot shows the distribution of average neutral  $F_{ST}$   
546 values for all 1,128 pairwise combinations. Mean neutral  $F_{ST}$  values were calculated by averaging individual  $F_{ST}$  values  
547 from 20,008 genome-wide intronic SNPs for each pairwise comparison. The plots on the left and the right show  
548 population pairs in the lower (blue) and upper (red) 5% tails of the  $F_{ST}$  distribution. (C) Population structure of all *DrosEU*  
549 samples as determined by PCA of allele frequencies of 20,008 SNPs located in short introns (< 60 bp). The optimal  
550 number of five clusters was estimated by hierarchical model fitting using the first four principal components. Cluster  
551 assignment of each population, which was estimated by k-means clustering, is indicated by color.  
552

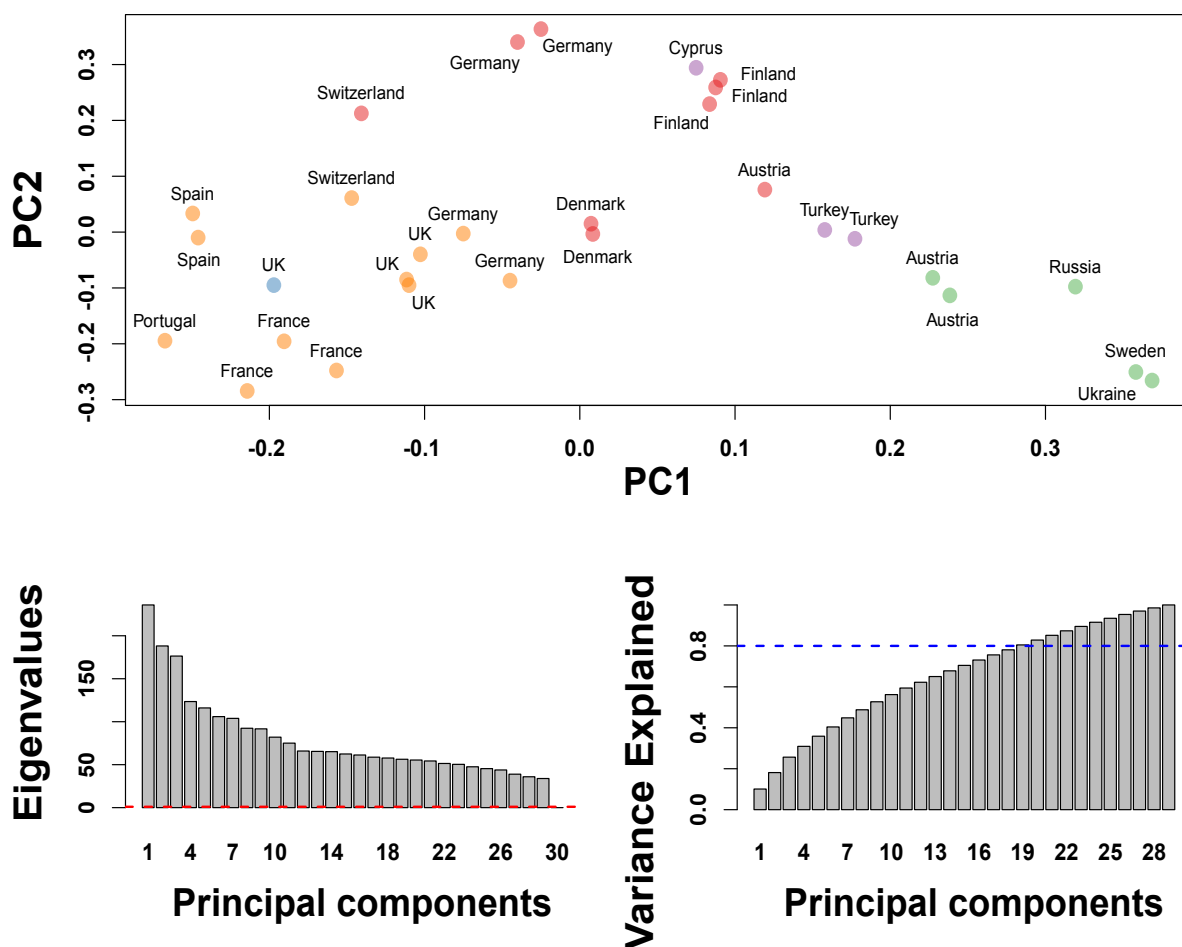

553  
554 **Figure 14 - figure supplement 1:** Genetic differentiation among European populations. Similar to Figure 14, the top plot  
555 shows the population structure of all *DrosEU* samples as determined by PCA of allele frequencies of 20,008 SNPs  
556 located in short introns (< 60 bp) but only on a reduced dataset with one randomly drawn Ukrainian sample to test if the  
557 longitudinal pattern found in the full dataset was an artifact of the excessive sampling in the Ukraine. The bottom left plot  
558 shows the cumulative variance explained by each of the principal components (PC) and the bottom right barplot depicts

559 the Eigenvalues of each PC.

560

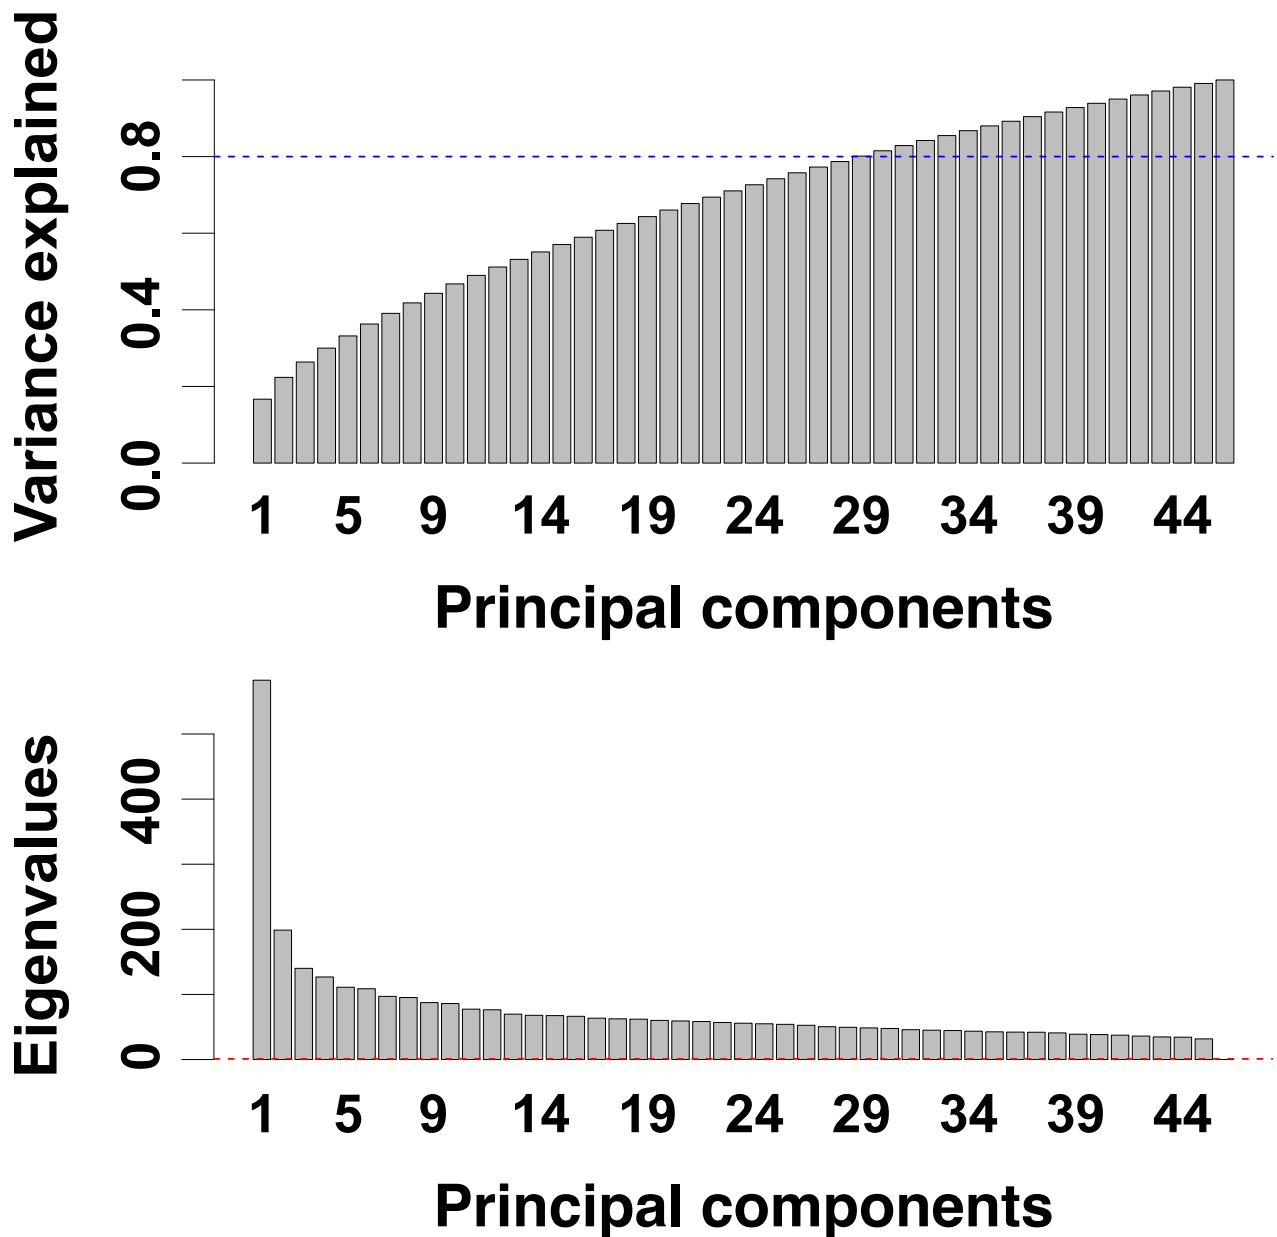

561

562 **Figure 14 - figure supplement 2:** PCA of neutrally evolving SNPs in the 48 DrosEU samples. The top plot shows the  
563 cumulative variance explained by each of the principal components (PC) from a PCA based on the allele frequencies of  
564 20,008 putatively neutrally evolving SNPs located in short (<60bp) introns distant from chromosomal inversions. The  
565 bottom barplot depicts the Eigenvalues of each PC.

566

567 To further explore these patterns, we performed a principal component analysis (PCA) on  
568 the allele frequencies of SNPs in short introns. The first three principal components (PC)  
569 explained more than 25% of the total variance (PC1: 16.3%, PC2: 5.4%, PC3: 4.8%,  
570 eigenvalues = 599.2, 199.1, and 178.5 respectively; Figure 14C and Figure 14 - figure  
571 supplement 2). As expected, PC1 was strongly correlated with longitude. Despite  
572 significant signals of autocorrelation, as indicated by Moran's test on residuals from linear  
573 regressions with PC1, the association with longitude was not due to spatial  
574 autocorrelation, since a spatial error model also resulted in a significant association. PC2  
575 was similarly, but to a lesser extent, correlated with longitude and also with altitude. PC3,  
576 by contrast, was not associated with any variable examined (Table 2). None of the major  
577 PC axes were correlated with season, indicating that there were no shared seasonal  
578 differences across samples in our dataset. Hierarchical model fitting based on the first  
579 three PC axes resulted in five distinct clusters (Figure 14C) that were oriented along the  
580 axis of PC1, supporting the notion of strong longitudinal differentiation among European  
581 populations. To the best of our knowledge, such a pronounced longitudinal signature of  
582 differentiation has not previously been reported in European *D. melanogaster*.  
583 Remarkably, this pattern is qualitatively similar to that observed for human populations  
584 (Cavalli-Sforza 1966; Xiao *et al.* 2004; Francalacci & Sanna 2008), perhaps consistent  
585 with co-migration of this commensal species.

586

### 587 **Mitochondrial haplotypes also exhibit longitudinal population structure**

588 Our finding that European populations are longitudinally structured is also supported by an  
589 analysis of mitochondrial haplotypes. We identified two main mitochondrial haplotypes in  
590 Europe, separated by at least 41 mutations (between G1.2 and G2.1; Figure 15A). Our  
591 findings are consistent with similar analyses of mitochondrial haplotypes from a North

592 American *D. melanogaster* population (Cooper *et al.* 2015) as well as from worldwide  
 593 samples (Wolff *et al.* 2016), revealing varying degrees of differentiation among haplotypes,  
 594 ranging from only a few to hundreds of substitutions. The two G1 subtypes (G1.1 and  
 595 G1.2) are separated by only four mutations, and the three G2 subtypes are separated by a  
 596 maximum of four mutations (between G2.1 and G2.3). The estimated frequency of these  
 597 haplotypes varied greatly among populations (Figure 15B). Qualitatively, three types of  
 598 European populations can be distinguished based on these haplotypes, namely those with  
 599 (1) a high frequency (> 60%) of the G1 haplotypes, characteristic of central European  
 600 samples, (2) a low frequency (< 40%) of G1 haplotypes, a pattern common for Eastern  
 601 European populations in summer, and (3) a combined frequency of G1 haplotypes  
 602 between 40-60%, which is typical of samples from the Iberian Peninsula and from Eastern  
 603 Europe in fall (Figure 15 - figure supplement 1).  
 604

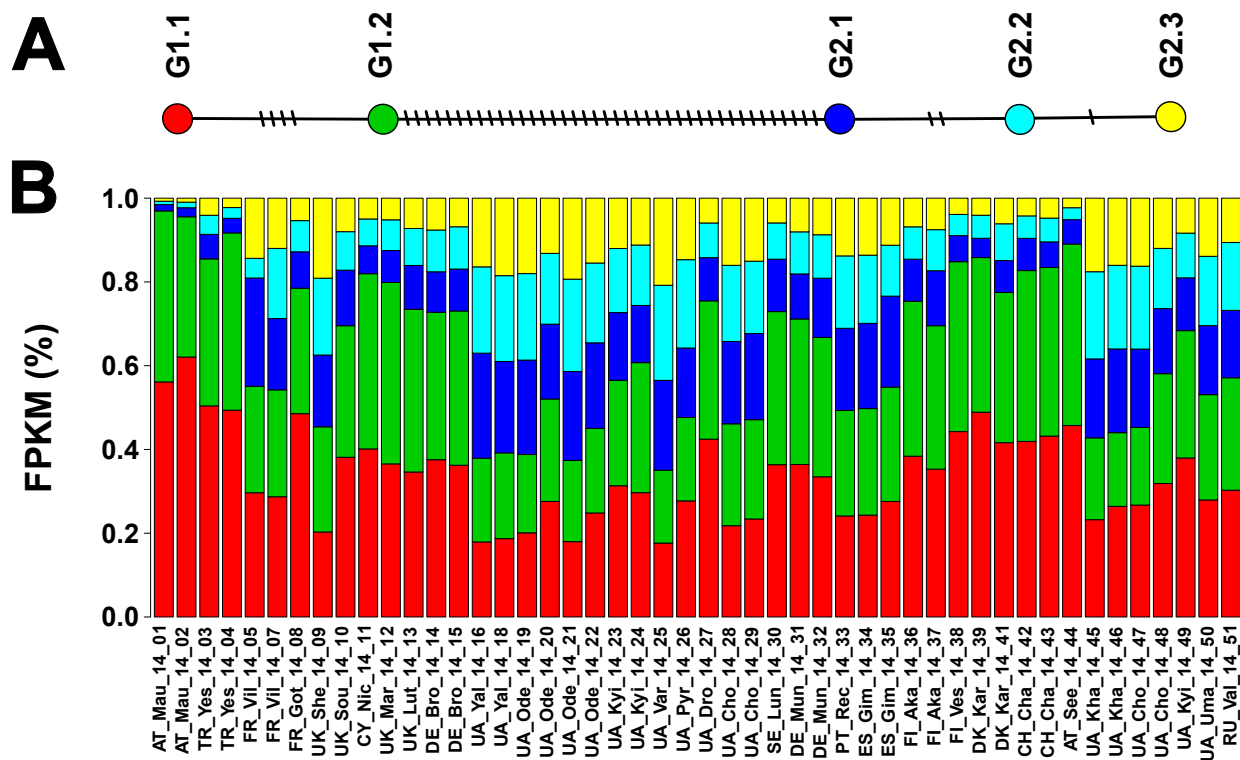

605

606 **Figure 15 with 1 supplement. Mitochondrial haplotypes.** (A) TCS network showing the relationship of 5 common



607 mitochondrial haplotypes; (B) estimated frequency of each mitochondrial haplotype in 48 European samples.

608

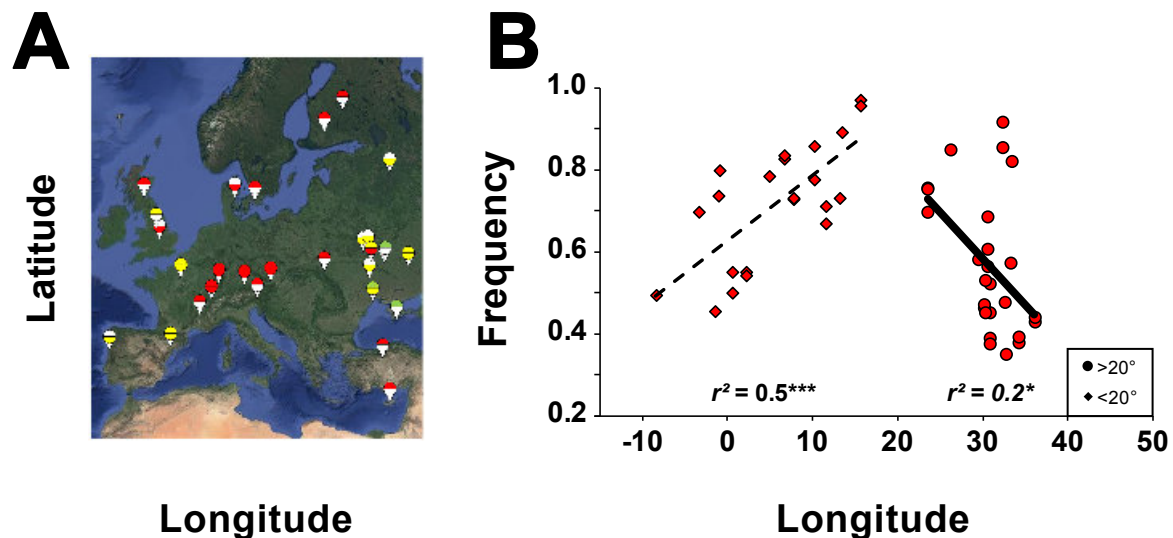

609

610 **Figure 15 - figure supplement 1. Mitochondrial haplotypes.** (A) Graphical summary of the combined frequency of G1  
611 haplotypes in Europe. Summer and Fall are represented at the top and bottom of the circles, respectively. White – no  
612 information; green, yellow and red represent a combined frequency of G1 haplotypes lower than 40%, in between 40%  
613 and 60% and higher than 60%, respectively. (B) Correlations between the combined frequency of G1 haplotypes and  
614 longitude (red diamonds for populations below 20° and red circles for populations above 20°).

615

616 We observed a significant shift in the relative frequencies of the two haplotype classes  
617 between summer and fall samples in only two of the nine possible comparisons among  
618 haplotypes. While there was no correlation between latitude and the combined frequency  
619 of G1 haplotypes, we found a weak but significant negative correlation between G1  
620 haplotypes and longitude ( $r^2 = 0.10$ ;  $p < 0.05$ ), which is consistent with the longitudinal  
621 east-west population structure observed for intronic SNPs. In a subsequent analysis, we  
622 divided the dataset at 20° longitude into an eastern and a western subset since in northern  
623 Europe 20° longitude corresponds to the division of two major climatic zones, namely C

624 (temperate) and D (cold), according to the Köppen-Geiger climate classification (Peel *et al.*  
625 2007). When splitting the populations in a western (longitude < 20° E) and an eastern  
626 group (longitude > 20° E), we found a clear correlation between longitude and the  
627 combined frequency of G1 haplotypes, explaining as much as 50% of the variation in the  
628 western group (Figure 15 - figure supplement 1B). Similarly, in the eastern populations  
629 longitude and the combined frequency of G1 haplotypes were correlated, explaining  
630 approximately 20% of the variance (Figure 15 - figure supplement 1B). Thus, our data on  
631 mitochondrial haplotypes clearly confirm the existence of pronounced east-west population  
632 structure and differentiation in European *D. melanogaster*. While this might be due to  
633 climatic selection, as recently found for clinal mitochondrial haplotypes in Australia (Camus  
634 *et al.* 2017), we can presently not rule out an effect of demography.

635

### 636 **The majority of TEs vary with longitude and altitude**

637 To examine the population genetics of structural variants in our data, we first focused on  
638 transposable elements (TEs). The repetitive content of the 48 samples analyzed ranged  
639 from 16% to 21% with respect to nuclear genome size (Figure 16). The vast majority of  
640 detected repeats were TEs, mostly represented by long terminal repeats (LTR) and long  
641 interspersed nuclear elements (LINE; Class I), as well as a few DNA elements (Class II).  
642 LTR content best explained total TE content (LINE+LTR+DNA) (Pearson's  $r = 0.87$ ,  $p <$   
643  $0.01$ , vs. DNA  $r = 0.58$ ,  $p = 0.0117$ , and LINE  $r = 0.36$ ,  $p < 0.01$  and Figure S16A).

644

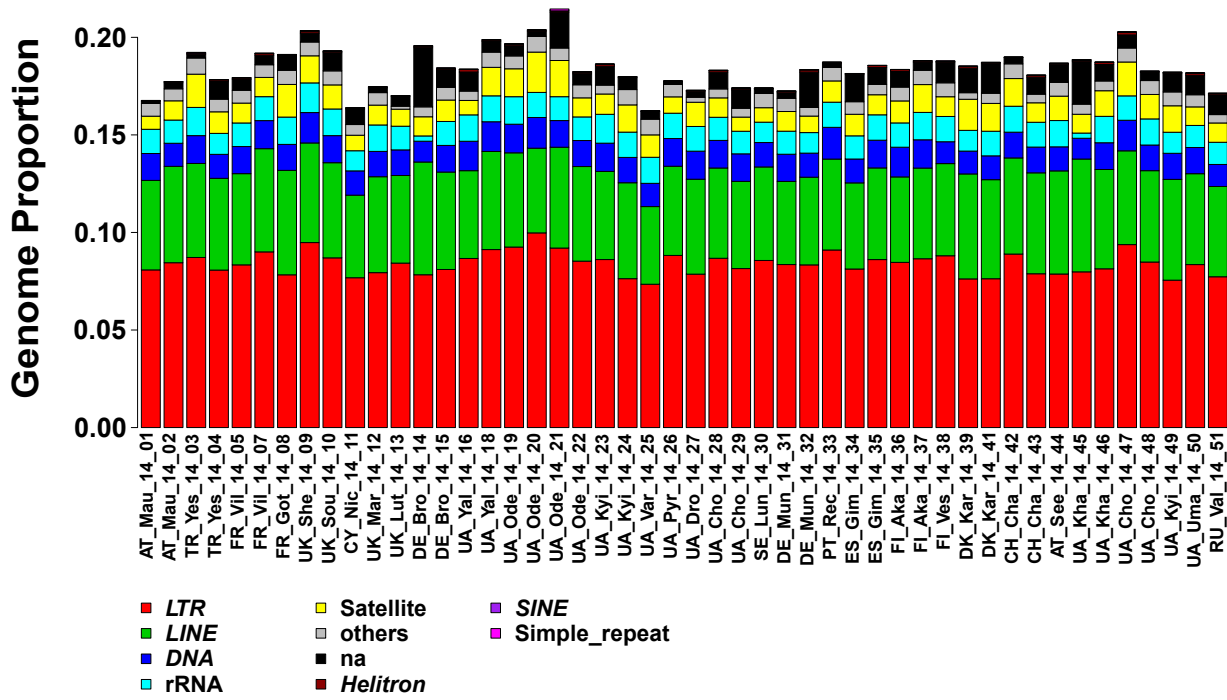

645

646 **Figure 16 with 1 supplement. Transposable elements.** Relative abundances of repeats among samples. Proportion of  
 647 each repeat class was estimated from sampled reads with dnaPipeTE (2 samples per run, 0.1X coverage per sample).

648

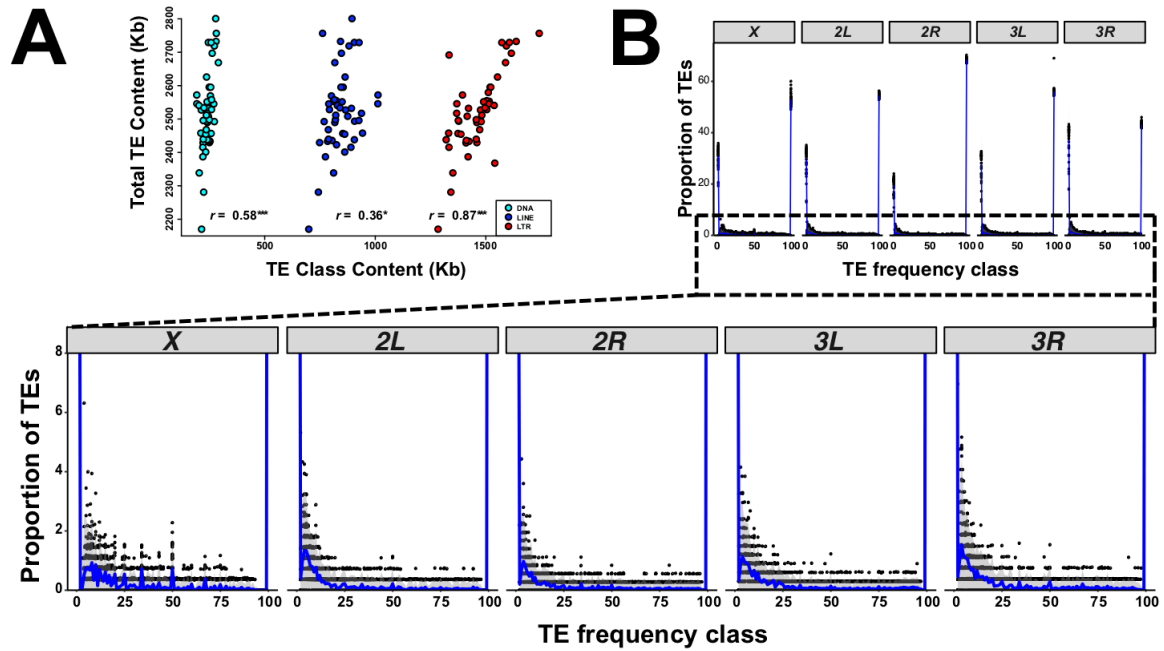

649

650 **Figure 16 - figure supplement 1. Transposable Elements.** (A) shows the contribution of each of the main TE classes  
651 to variation of the total TE content. Correlations (Pearson's correlation tests) between each of the three main TE classes  
652 (LTR, LINE and DNA) and the total TE content of each pool (LTR+LINE+DNA) in Kb. (B) The site frequency spectrum of  
653 TE frequencies per chromosome arm. Each dot represents the proportion of TEs in each bin per sample and a smoother  
654 geometric line had been added to highlight the trend. Lower panel is a zoom in of the above panel.

655

656 We next estimated population-wise frequencies of 1,630 TE insertions annotated in the *D.*  
657 *melanogaster* reference genome v.6.04 using *T-lex2* (Table S7, Fiston-Lavier *et al.* 2010).  
658 On average, 56% of the TEs annotated in the reference genome were fixed in all samples.  
659 The remaining polymorphic TEs usually segregated at low frequency in all samples (Figure  
660 16 - figure supplement 1A), potentially due to the effect of purifying selection (González *et al.*  
661 2008; Petrov *et al.* 2011; Kofler *et al.* 2012; Cridland *et al.* 2013; Blumenstiel *et al.*  
662 2014). However, we also observed 142 TE insertions present at intermediate (>10% and  
663 <95%) frequencies (Figure 16 - figure supplement 1B), which might be consistent with  
664 transposition-selection balance (Charlesworth *et al.* 1994).

665

666 In each of the 48 samples TE frequency and recombination rate were negatively correlated  
667 on a genome-wide level (Spearman rank sum test;  $p < 0.01$ ), as previously reported  
668 (Bartolomé *et al.* 2002; Petrov *et al.* 2011; Kofler *et al.* 2012). This pattern still holds when  
669 only polymorphic TEs (population frequency  $< 95\%$ ) are analyzed, although it becomes  
670 statistically non-significant for some chromosomes and populations (Table S8). In either  
671 case, the correlation is more negative when using broad-scale, rather than fine-scale,  
672 recombination rate estimates (Materials and methods, Tables S8B, S8D). This indicates  
673 that broad-scale recombination patterns may best capture long-term population  
674 recombination patterns.

675

676 We further tested whether the distribution of TE frequencies among samples could be  
677 explained by geographical or temporal variables. We focused on the 141 TE insertions that  
678 showed frequency variability among samples (interquartile range, (IQR)  $> 10$ ; see  
679 Materials and Methods). Of these, 73 TEs showed significant associations with  
680 geographical or temporal variables after multiple testing correction (Table S9). Note that  
681 we used a conservative p-value threshold ( $< 0.001$ ), and we did not find significant  
682 residual spatio-temporal autocorrelation among samples for any TE tested (Moran's  $I >$   
683  $0.05$  for all tests; Table S9). 16 out of 73 TEs were located in regions of very low  
684 recombination (0 cM/Mb for either of the two recombination measures used). Among the  
685 57 significant TEs located in high recombination regions, we observed significant  
686 correlations of 13 TEs with longitude, 13 with altitude, 5 with latitude, and 3 with season  
687 (Table S9). In addition, the frequencies of the other 23 insertions were significantly  
688 correlated with more than one of the above-mentioned variables (Table S9). These  
689 significant TEs were scattered along the main five chromosome arms (Table S9). Among

690 the 57 significant TEs located in high recombination regions two TE families were enriched  
691 ( $\chi^2$  p-values after Yate's correction < 0.05): the LTR 297 family with 11 copies, and the  
692 DNA *pogo* family with 5 copies (Table S10). We also checked the genomic localization of  
693 the 57 TEs. Most of them (42) were located inside genes: two in 5'UTR, four in 3'UTR, 18  
694 in the first intron, and 18 TEs in subsequent introns. Additionally, 7 TEs are <1 kb from the  
695 nearest gene, indicating that these might potentially affect the regulation of nearby genes  
696 (Table S9). Interestingly, 14 of these 57 TEs coincide with previously identified candidate  
697 adaptive TEs (Table S9), suggesting that our dataset might be enriched for adaptive  
698 insertions. However, further analyses are needed to discard the effect of non-selective  
699 forces on the patterns observed.

700

### 701 **Inversion polymorphisms in Europe exhibit latitudinal and longitudinal clines**

702 Chromosomal inversions are another class of important and common structural genomic  
703 variants, often exhibiting frequency clines on multiple continents, some of which have been  
704 shown to be adaptive (e.g. Knibb 1982; Umina *et al.* 2005; Kapun *et al.* 2014; 2016a).  
705 However, little is known yet about the spatial distribution and clinality of inversions in  
706 Europe. We used a panel of inversion-specific marker SNPs (Kapun *et al.* 2014) to  
707 examine the presence and frequency of six cosmopolitan inversion polymorphisms  
708 (*In(2L)t*, *In(2R)NS*, *In(3L)P*, *In(3R)C*, *In(3R)Mo*, *In(3R)Payne*) in the 48 samples. All  
709 populations were polymorphic for one or more inversions (Figure 17). However, only  
710 *In(2L)t* segregated at substantial frequencies in most populations (average frequency =  
711 20.2%). All other inversions were either absent or occurred at low frequencies (average  
712 frequencies: *In(2R)NS* = 6.2%, *In(3L)P* = 4%, *In(3R)C* = 3.1%, *In(3R)Mo* = 2.2%,  
713 *In(3R)Payne* = 5.7%).

714

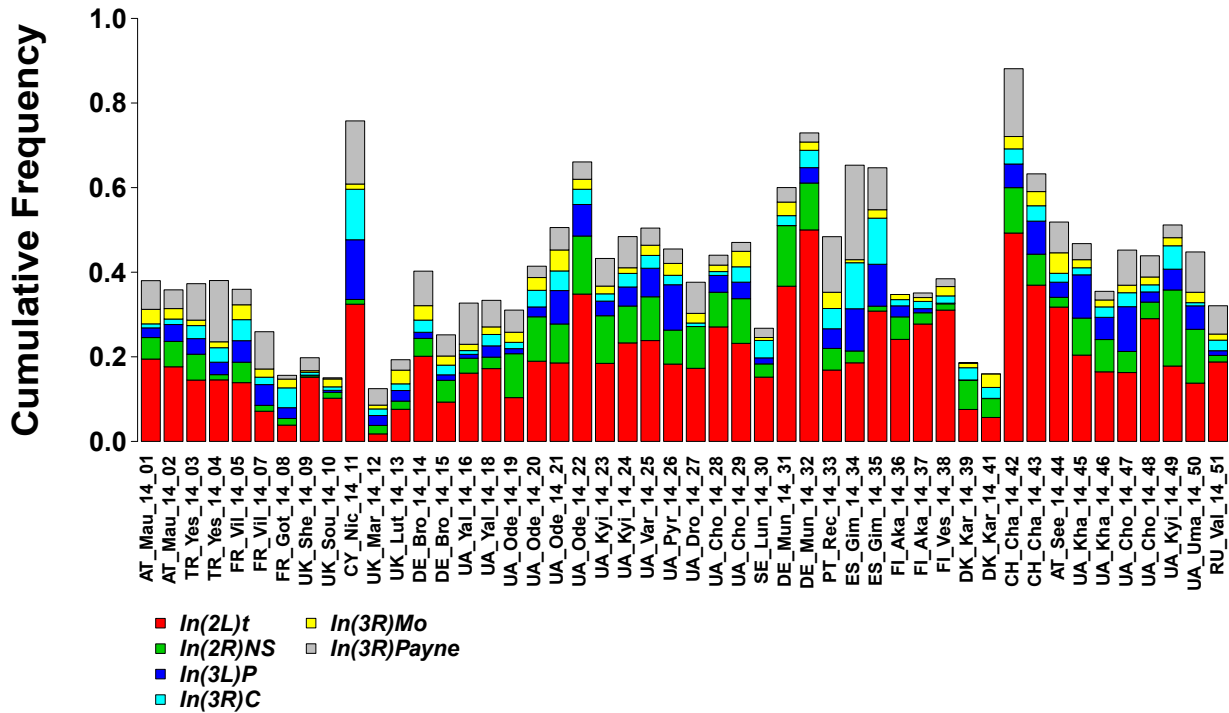

715

716 **Figure 17 with 1 supplement. Distribution of inversion frequencies.** Cumulative bar plots showing the absolute  
 717 frequencies of six cosmopolitan inversions (*In(2L)t*, *In(2R)NS*, *In(3L)P*, *In(3R)C*, *In(3R)Mo*, *In(3R)Payne*) in all 48  
 718 population samples of the *DrosEU* dataset.

719

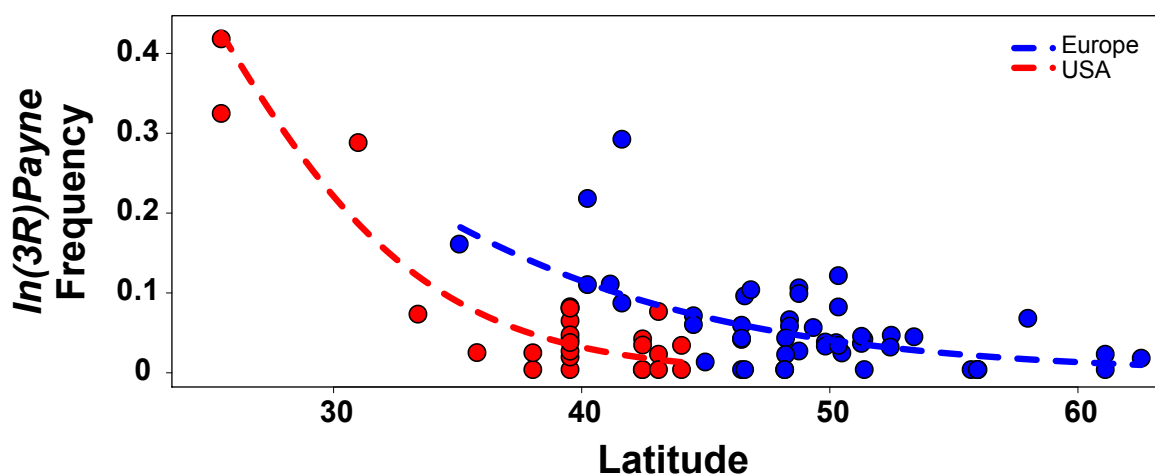

720

721 **Figure 17 - figure supplement 1. Clinal variation of the inversion *In(3R)Payne* across continents.** Parallel

722 frequency clines of *In(3R)Payne* along the latitudinal axis at the North American east coast (red) and in Europe (blue)  
723 (see also Table S10).

724

725 Despite their overall low frequencies, several inversions exhibited clinal patterns across  
726 space (Table 3). We observed significant latitudinal clines for *In(3L)P*, *In(3R)C* and  
727 *In(3R)Payne*. Although they differed in overall frequencies, *In(3L)P* and *In(3R)Payne*  
728 showed latitudinal clines in Europe that are qualitatively similar to the clines previously  
729 observed along the North American and Australian east coasts (Figure S17 and Table  
730 S11, Kapun *et al.* 2016a). For the first time, we also detected a longitudinal cline for *In(2L)t*  
731 and *In(2R)NS*, with both inversions decreasing in frequency from east to west, a result that  
732 is consistent with our finding of strong longitudinal among-population differentiation in  
733 Europe. *In(2L)t* also increased in frequency with altitude (Table 3). Except for *In(3R)C*, we  
734 did not find significant residual spatio-temporal autocorrelation among samples for any  
735 inversion tested (Moran's  $I \approx 0$ ,  $p > 0.05$  for all tests; Table 3), suggesting that our analysis  
736 was not confounded by spatial autocorrelation for most of the inversions. It will clearly be  
737 interesting to examine the extent to which clines in inversions (and other genomic variants)  
738 across Europe are shaped by selection and/or demography in future work.

739

#### 740 **European *Drosophila* microbiomes contain trypanosomatids and novel viruses**

741 We were also interested in determining the abundance of microbiota associated with *D.*  
742 *melanogaster* from the Pool-Seq data – these endosymbionts often have crucial functions  
743 in affecting the life history, immunity, hormonal physiology, and metabolic homeostasis of  
744 their fly hosts (e.g., Trinder *et al.* 2017; Martino *et al.* 2017). The taxonomic origin of a total  
745 of 262 million non-*Drosophila* reads was inferred using MGRAST, which identifies and  
746 counts short protein motifs ('features') within reads (Meyer *et al.* 2008). The largest fraction



747 of protein features was assigned to *Wolbachia* (on average 53.7%; Figure 18), a well-  
 748 known endosymbiont of *Drosophila* (Werren *et al.* 2008). The relative abundance of  
 749 *Wolbachia* protein features varied strongly between samples ranging from 8.8% in a  
 750 sample from the UK to almost 100% in samples from Spain, Portugal, Turkey and Russia  
 751 (Table 1). Similarly, *Wolbachia* loads varied 100x between samples if we use the ratio of  
 752 *Wolbachia* protein features divided by the number of *Drosophila* sequences retrieved for  
 753 that sample as a proxy for relative micro-organismal load (for a full table of micro-  
 754 organismal loads standardized by *Drosophila* genome coverage see Table S12).  
 755

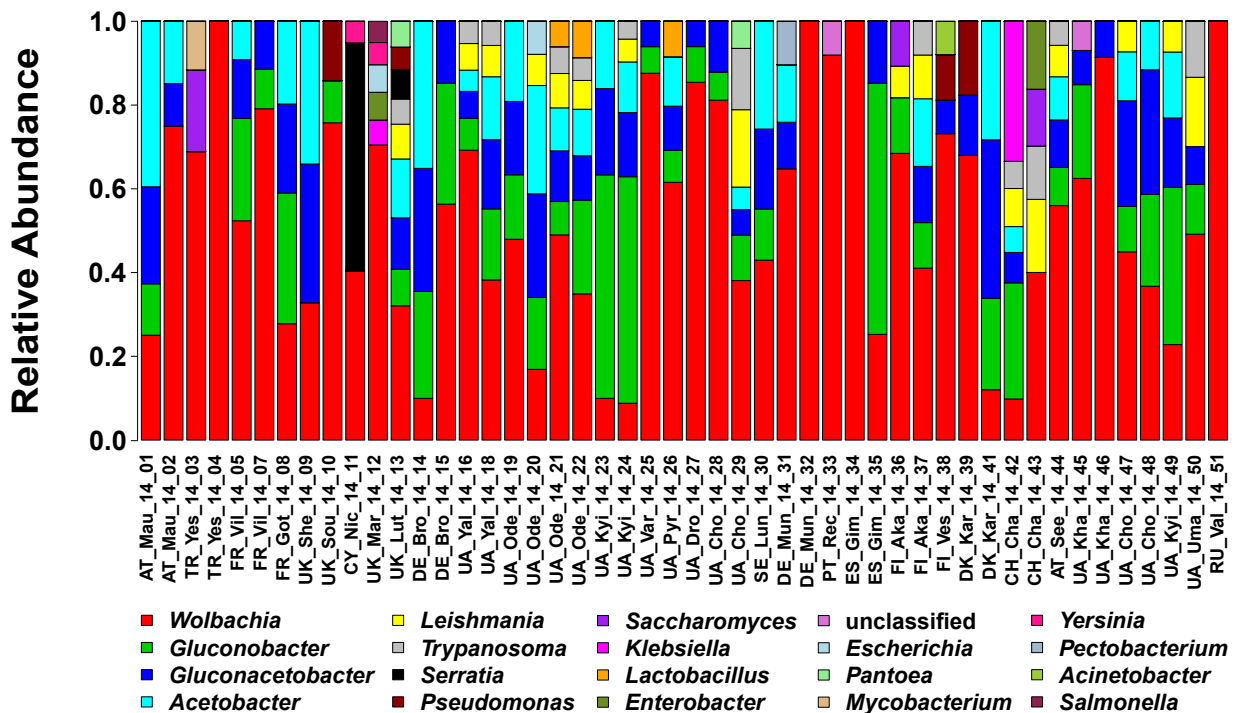

756  
 757 **Figure 18: Microbiome.** Relative abundance of *Drosophila*-associated microbes as assessed by MGRAST classified  
 758 shotgun sequences. Microbes had to reach at least 3% relative abundance in one of the samples to be presented  
 759  
 760 Acetic acid bacteria of the genera *Gluconobacter*, *Gluconacetobacter*, and *Acetobacter*  
 761 were the second largest group, with an average relative abundance of 34.4%.

762 Furthermore, we found evidence for the presence of several genera of Enterobacteria  
763 (*Serratia*, *Yersinia*, *Klebsiella*, *Pantoea*, *Escherichia*, *Enterobacter*, *Salmonella*, and  
764 *Pectobacterium*). *Serratia* occurs only at low frequencies or is absent from most of our  
765 samples, but reaches a very high relative abundance in the Nicosia summer collection  
766 (54.5%). This high relative abundance was accompanied by an 80x increase in *Serratia*  
767 bacterial load. We detected several eukaryotic microorganisms, although they were less  
768 abundant than the bacteria. The fraction of fungal protein features is larger than 3% in only  
769 three of our samples from Finland, Austria and Turkey (Table 1). Interestingly, we detected  
770 the presence of trypanosomatids in 16 of our samples, consistent with other recent  
771 evidence that *Drosophila* can host these organisms (Wilfert *et al.* 2011; Chandler & James  
772 2013; Hamilton *et al.* 2015).

773

774 Our data also allowed us to detect the presence of five different DNA viruses (Table S13).  
775 These included approximately two million reads from *Kallithea* nudivirus (Webster *et al.*  
776 2015), allowing us to assemble the complete *Kallithea* genome for the first time (>300-fold  
777 coverage in the Ukrainian sample UA\_Kha\_14\_46; Genbank accession KX130344). We  
778 also identified around 1,000 reads from a novel nudivirus that is closely related to *Kallithea*  
779 virus and to *Drosophila innubila* nudivirus (Unckless 2011) in sample DK\_Kar\_14\_41 from  
780 Karensminde, Denmark (Table 1). These sequences permitted us to identify a publicly  
781 available dataset (SRR3939042: 27 male *D. melanogaster* from Esparto, California;  
782 Machado *et al.* 2016) that contained sufficient reads to complete the genome (provisionally  
783 named “Esparto Virus”; KY608910). We further identified two novel Densoviruses  
784 (*Parvoviridae*), which we have provisionally named “Viltain virus”, a relative of *Culex*  
785 *pipiens* densovirus found at 94-fold coverage in sample FR\_Vil\_14\_07 (Viltain; KX648535)  
786 and “Linvill Road virus”, a relative of *Dendrolimus punctatus* densovirus that was

787 represented by only 300 reads here, but which has previously been found to have a high  
788 coverage in dataset SRR2396966 from a North American sample of *D. simulans*  
789 (KX648536; Machado *et al.* 2016). In addition, we detected a novel member of the  
790 *Bidnaviridae* family, “*Vesanto virus*”, a bidensovirus related to *Bombyx mori* densovirus 3  
791 with approximately 900-fold coverage in sample FI\_Ves\_14\_38 (Vesanto; KX648533 and  
792 KX648534), Using a detection threshold of >0.1% of the *Drosophila* genome copy number,  
793 the most commonly detected viruses were *Kallithea virus* (30/48 of the pools) and *Vesanto*  
794 virus (25/48), followed by *Linvill Road virus* (7/48) and *Viltain virus* (5/48), with *Esparto*  
795 virus being the rarest (2/48). In some samples, the viruses reached strikingly high titers: on  
796 13 occasions the virus genome copy number in the pool exceeded the host genome copy  
797 number, reaching a maximum of nearly 20-fold in Vesanto.

798

799 This continent-wide analysis of the microbiota associated with fruit flies suggests that  
800 natural populations of European *D. melanogaster* differ greatly in the composition and  
801 relative abundance of microbes and viruses.

802

## 803 **Discussion**

804 In recent years, large-scale population resequencing projects have shed light on the  
805 biology of both model (Mackay *et al.* 2012; Langley *et al.* 2012; Consortium 2015; Lack *et*  
806 *al.* 2015; Alonso-Blanco *et al.* 2016; Lack *et al.* 2016) and non-model organisms (e.g.,  
807 Hohenlohe *et al.* 2010; Wolf *et al.* 2010). Such massive datasets contribute greatly to our  
808 growing understanding of the processes that create and maintain genetic variation in  
809 natural populations. However, the relevant spatio-temporal scales for population genomic  
810 analyses remain largely unknown. Here we have applied, for the first time, a  
811 comprehensive sampling and sequencing strategy to European populations of *D.*

812 *melanogaster*, allowing us to uncover previously unknown aspects of this species’  
813 population biology.  
814  
815 A main result from our analyses of SNPs located in short introns and presumably evolving  
816 neutrally (Parsch *et al.* 2010) is that European *D. melanogaster* populations exhibit very  
817 pronounced longitudinal differentiation, a pattern that – to the best of our knowledge – has  
818 not been observed before for the European continent (for patterns of longitudinal  
819 differentiation in Africa see e.g. Michalakis & Veuille 1996; Aulard *et al.* 2002; Fabian *et al.*  
820 2015). Genetic differentiation was greatest between populations from eastern and western  
821 Europe (Figure 14). The eastern populations included those from the Ukraine, Russia, and  
822 Turkey, as well as one from eastern Austria, suggesting that there may be a region of  
823 restricted gene flow in south-central Europe. However, populations from Finland and  
824 Cyprus are more similar to western populations than to eastern populations, possibly as a  
825 result of migration along shipping routes in the Baltic and Mediterranean seas. More data  
826 from populations in the unsampled, intermediate regions are needed to better delineate  
827 the geographic limits of the eastern and western population groups. Consistent with the  
828 strong differentiation between eastern and western populations, our PCA analysis  
829 revealed that longitude was the major factor associated with among-population  
830 divergence, with no significant effect of latitude (Figure 14C; Table 2). Thus, the patterns  
831 of neutral genetic differentiation in Europe contrast with those previously reported for North  
832 America, where latitude impacts neutral differentiation (Machado *et al.* 2016; Kapun *et al.*  
833 2016a). However, our present analysis does not exclude the existence of clinally varying  
834 polymorphisms in European populations outside short introns: for example, we detected  
835 latitudinal frequency clines both for TEs and inversion polymorphisms. A detailed analysis  
836 of genome-wide patterns of clinal variation in the 2014 *DrosEU* data is beyond the scope

837 of this paper and currently under way.

838

839 The mitochondrial genome and several chromosomal inversions and TEs showed similar  
840 patterns of differentiation as the rest of the genome, with the main axis of differentiation  
841 being longitudinal. Uncovering the extent to which this pattern is driven by demography  
842 and/or selection, and identifying the underlying environmental correlates (including any  
843 potential role of co-migration with human populations), will be an important task for future  
844 analyses. Due to the high density of samples and the large number of SNP markers  
845 examined, our results reveal that European populations of *D. melanogaster* exhibit much  
846 more differentiation and structure than previously thought (e.g., Baudry *et al.* 2004;  
847 Dieringer *et al.* 2005; Schlötterer *et al.* 2006; Nunes *et al.* 2008; Mateo *et al.* 2018).

848

849 Within the eastern and western population groups there was a low – but detectable – level  
850 of genetic differentiation among populations, including those that are geographically close  
851 (Figure 14C). These population differences persisted over a timespan of at least 2–3  
852 months, as there was less genetic differentiation between the summer and fall samples of  
853 the 13 locations sampled at multiple time points than between neighboring populations  
854 (Figure 14C). Thus, while the weak but significant signal of IBD suggests homogenizing  
855 gene flow across geography, there is seasonally stable differentiation among populations.  
856 The season in which samples were collected did not show a significant association with  
857 genetic differentiation, except when considered in conjunction with longitude or altitude  
858 (Table 2). However, the data analyzed here are from a single year only: demonstrating  
859 recurrent shifts in SNP frequencies due to temporally varying selection will require analysis  
860 of additional annual samples. For an extensive analysis of patterns of seasonal variation  
861 across a broad geographic scale see Machado *et al.* (2018)

862

863 Our Pool-Seq data also allowed us to characterize geographic patterns in both inversions  
864 and TEs. In marked contrast to putatively neutral SNPs, the frequencies of several  
865 chromosomal inversions, including *In(3L)P*, *In(3R)C*, and *In(3R)Payne*, showed a  
866 significant correlation with latitude (Table 3). For *In(3L)P* and *In(3R)Payne*, the latitudinal  
867 clines were in qualitative agreement with parallel clines reported from North America and  
868 Australia, with the inversions decreasing in frequency as distance from the equator  
869 increases (Mettler *et al.* 1977; Knibb *et al.* 1981; Fabian *et al.* 2012; Kapun *et al.* 2014;  
870 Rane *et al.* 2015; Kapun *et al.* 2016a). This suggests that these inversions may contain  
871 genetic variants that are better adapted to warmer environments than to temperate  
872 climates. The overall frequencies of these inversions are, however, low in Europe (<5%),  
873 indicating that they might play only a minor role in local adaptation to European habitats.  
874 Some euchromatic TE insertions also showed geographic or seasonal patterns of variation  
875 (Table S7), indicating that they might play a role in local adaptation, particularly as many of  
876 them are located in regions where they could affect gene regulation. Importantly, several  
877 inversions and TEs also showed longitudinal frequency gradients, thus supporting the  
878 notion that European populations exhibit marked longitudinal differentiation.

879

880 We also examined signatures of selective sweeps in our dataset. We found 144 genomic  
881 regions that showed signatures of hard sweeps in regions of normal recombination (cM/Mb  
882  $\geq 0.5$ ), and with reduced variation and negative Tajima's *D* ( $D \leq -0.8$ ) in all European  
883 populations (Figure 12, Table S6). Four of these regions were identified in previous studies  
884 as potential targets for positive selection.

885

886 The first region, at the center of chromosome arm *2R* (Figure 12A, Table S6), was

887 previously found to be strongly differentiated between African and North American  
888 populations (Langley *et al.* 2012) and contains two genes, *Cyp6g1* and *Hen-1*, that are  
889 associated with recent, strong selection. The cytochrome P450 gene *Cyp6g1* has been  
890 linked to insecticide resistance (Daborn *et al.* 2002; Schmidt *et al.* 2010), shows evidence  
891 for recent selection independently in both *D. melanogaster* and *D. simulans* (Schlenke &  
892 Begun 2003; Catania *et al.* 2004), and is associated with a large differentiated region in  
893 the Australian latitudinal cline (Kolaczkowski *et al.* 2011a). *Hen-1*, a methyltransferase  
894 involved in maturation of small RNAs involved in virus and TE suppression, showed  
895 marginally non-significant evidence for selective sweeps in North American and African  
896 populations of *D. melanogaster* (Kolaczkowski *et al.* 2011b).

897

898 The second region previously implicated in a selective sweep is located on chromosome  
899 arm 3L (Figure 12B, Table S6) and centered around the chimeric gene *CR18217*, which  
900 formed from the fusion of a gene encoding a DNA-repair enzyme (*CG4098*) and a  
901 centriole gene (*spd-2*; Rogers & Hartl 2012). *CR18217* appears to be unique to *D.*  
902 *melanogaster*, but – in spite of its recent origin – segregates at frequencies of around 90%  
903 (Rogers & Hartl 2012), consistent with a recent strong sweep in this region of the genome.  
904 This putative sweep region also spans *Prosbeta6*, which (like HDAC) encodes a gene  
905 involved in proteolysis (Flybase v. FB2017\_05; Gramates *et al.* 2017). *Prosbeta6* also  
906 shows homology to genes involved in immune function (Lyne *et al.* 2007; Handu *et al.*  
907 2015), which might explain why it has been a target of positive selection.

908

909 The third previously characterized sweep region, surrounding the *wapl* gene on the X  
910 chromosome (Table S6), was identified as showing evidence of strong selective sweeps in  
911 both African and European *D. melanogaster* populations (Beisswanger *et al.* 2006; Boitard

912 *et al.* 2012). The genic targets of selection in this region are unclear, but most likely are  
913 *ph-p* in Europe and *ph-p* or *ph-d* in Africa (Beisswanger *et al.* 2006). These genes are  
914 tandem duplicates involved in the Polycomb response pathway, which functions as an  
915 epigenetic repressor of transcription (reviewed in Kassis *et al.* 2017).

916

917 The fourth previously observed sweep region, originally identified in African populations of  
918 *D. melanogaster*, is also located on the *X* chromosome (Table S6), but 30 cM closer to the  
919 telomere and thus not implicating the *wapl* region (Beisswanger *et al.* 2006; Boitard *et al.*  
920 2012). Selection in this region has been attributed to the *HDAC6* gene (Svetec *et al.*  
921 2009). *HDAC6*, although nominally a histone deacetylase, actually functions as a central  
922 player in managing cytotoxic assaults, including in transport and degradation of misfolded  
923 protein aggregates (reviewed in Matthias *et al.* 2008; Svetec *et al.* 2009).

924

925 Our data support the widespread occurrence of these previously identified sweeps in many  
926 populations in Europe. Notably, practically all European populations examined showed  
927 reduced variation and negative Tajima's *D* in these sweep regions. This is consistent with  
928 the sweeps either pre-dating the colonization of Europe (e.g., Beisswanger *et al.* 2006) or  
929 having swept across Europe more recently (also see Stephan 2010 for discussion). In  
930 addition, we also uncovered several novel genomic regions with tentative evidence for  
931 hard sweeps (Table S6) – these regions represent a valuable source for future analyses of  
932 signals of adaptive evolution in European *Drosophila*.

933

934 Finally, we used our Pool-Seq data to identify microbes and viruses and to quantify their  
935 presence in natural populations of *D. melanogaster* across the European continent.

936 *Wolbachia* was the most abundant bacterial genus associated with the flies, but its relative



937 abundance and load varied greatly among samples (Figure 18). The second most  
938 abundant bacterial taxon was acetic acid bacteria (*Acetobacteraceae*), a group previously  
939 found among the most abundant bacteria in natural *D. melanogaster* isolates (Chandler *et al.*  
940 *al.* 2011; Staubach *et al.* 2013). Other microbes were highly variable abundance in relative  
941 abundance. For example, *Serratia* abundance was low in most populations, but very high  
942 in the Nicosia sample, which might reflect that there are individuals in the Nicosia sample  
943 that carry a systemic *Serratia* infection generating high bacterial loads. Future sampling  
944 may shed light on the temporal stability and/or population specificity of these patterns.  
945 Contrary to expectation, we found relatively few yeast sequences. This is a bit surprising  
946 because yeasts are commonly found on rotting fruit, the main food substrate of *D.*  
947 *melanogaster*, and have been found in association with *Drosophila* before (Barata *et al.*  
948 2012; Chandler *et al.* 2012). This suggests that, although yeasts can attract flies and play  
949 a role in food choice (Becher *et al.* 2012; Buser *et al.* 2014), they might not be highly  
950 prevalent in or on *D. melanogaster* bodies. While trypanosomatids have been reported in  
951 association with *Drosophila* before (Wilfert *et al.* 2011; Chandler & James 2013; Hamilton  
952 *et al.* 2015), our study provides the first systematic detection across a wide geographic  
953 range in *D. melanogaster*. Despite being host to a wide diversity of RNA viruses (Huszar &  
954 Imler 2008; Webster *et al.* 2015), only three DNA viruses have previously been reported in  
955 association with *Drosophilidae*, and only one from *D. melanogaster* (Unckless 2011;  
956 Webster *et al.* 2015; 2016). Here, we have discovered four new DNA viruses in *D.*  
957 *melanogaster*. Although it is not possible to directly estimate viral prevalence from pooled  
958 sequencing data, we found that the DNA viruses of *D. melanogaster* can be very  
959 widespread, with *Kallithea* virus detectable at a low level in most populations.

960

961 A striking qualitative pattern in our microbiome data is the high level of variability among

962 populations in the composition and relative amounts of different microbiota and viruses.  
963 Thus, an interesting open question is to what extent geographic differences in microbiota  
964 might contribute to phenotypic differences and local adaptation among fly populations,  
965 especially given that there might be tight and presumably local co-evolutionary interactions  
966 between fly hosts and their endosymbionts (e.g., Haselkorn *et al.* 2009; Richardson *et al.*  
967 2012; Staubach *et al.* 2013; Kriesner *et al.* 2016).

968

969 In conclusion, our study demonstrates that extensive sampling on a continent-wide scale  
970 and pooled sequencing of natural populations can reveal new aspects of population  
971 biology, even for a well-studied species such as *D. melanogaster*. Such extensive  
972 population sampling is feasible due to the close cooperation and synergism within our  
973 international consortium. Our efforts in Europe are paralleled in North America by the  
974 *Drosophila* Real Time Evolution Consortium (*Dros-RTEC*), with whom we are currently  
975 collaborating to compare population genomic data across continents. In future years, our  
976 consortia will continue to sample and sequence European and North American *Drosophila*  
977 populations in order to study these populations with increasing spatial and temporal  
978 resolution and to provide an unprecedented resource for the *Drosophila* and population  
979 genetics communities.

980

## 981 **Materials and Methods**

982 The 2014 *DrosEU* dataset analyzed here consists of 48 samples of *D. melanogaster*  
983 collected from 32 geographical locations at different time-points across the European  
984 continent, through a joint effort of 18 European research groups (see Figure 2, Table 1).  
985 Field collections were performed with baited traps using a standardized protocol (see  
986 Supplementary file for details). Up to 40 males from each collection were pooled, and DNA

987 extracted from each pool, using a standard phenol-chloroform based protocol. Each  
988 sample was processed in a single pool (Pool-Seq; Schlötterer *et al.* 2014), with each pool  
989 consisting of at least 33 wild-caught individuals. To exclude morphologically similar and  
990 co-occurring species, such as *D. simulans*, as potential contaminants from the samples,  
991 we only used wild-caught males and distinguished among species by examining genital  
992 morphology. Despite this precaution, we identified a low level of *D. simulans* contamination  
993 in our samples, and further steps were thus taken to exclude *D. simulans* sequences from  
994 our analysis (see below). The 2014 *DrosEU* dataset represents the most comprehensive  
995 spatio-temporal sampling of European *D. melanogaster* populations available to date  
996 (Table 1, Figure 3).

997

#### 998 **DNA extraction, library preparation and sequencing**

999 DNA was extracted from pools of 33–40 males per sample after joint homogenization with  
1000 bead beating and standard phenol/chloroform extraction. A detailed extraction protocol can  
1001 be found in the Supporting Information file. In brief, 500 ng of DNA in a final volume of 55.5  
1002  $\mu$ l were sheared with a Covaris instrument (Duty cycle 10, intensity 5, cycles/burst 200,  
1003 time 30) for each sample separately. Library preparation was performed using NEBNext  
1004 Ultra DNA Lib Prep-24 and NebNext Multiplex Oligos for Illumina-24 following the  
1005 manufacturer's instructions. Each pool was sequenced as paired-end fragments on a  
1006 Illumina NextSeq 500 sequencer at the Genomics Core Facility of Pompeu Fabra  
1007 University (UPF; Barcelona, Spain). Samples were multiplexed in five batches of 10  
1008 samples each, except for one batch that contained only 8 samples (see Supplementary  
1009 Table S1 for further information). Each multiplexed batch was sequenced on four lanes to  
1010 obtain an approximate 50x raw coverage for each sample. Reads were sequenced to a  
1011 length of 151 bp with a median insert size of 348 bp (ranging from 209 to 454 bp).

1012

### 1013 **Mapping pipeline and variant calling**

1014 Prior to mapping, we trimmed and filtered raw FASTQ reads to remove low-quality bases  
1015 (minimum base PHRED quality = 18; minimum sequence length = 75 bp) and sequencing  
1016 adaptors using cutadapt (v. 1.8.3; Martin 2011). We only retained read pairs for which both  
1017 reads fulfilled our quality criteria after trimming. FastQC analyses of trimmed and quality  
1018 filtered reads showed overall high base-qualities (median ranging from 29 to 35 in all 48  
1019 samples) and indicated a loss of ~1.36% of all bases after trimming relative to the raw  
1020 data. We used bwa mem (v. 0.7.15; Li 2013) with default parameters to map trimmed  
1021 reads against a compound reference genome consisting of the genomes from *D.*  
1022 *melanogaster* (v.6.12) and genomes from common commensals and pathogens, including  
1023 *Saccharomyces cerevisiae* (GCF\_000146045.2), *Wolbachia pipientis* (NC\_002978.6),  
1024 *Pseudomonas entomophila* (NC\_008027.1), *Commensalibacter intestine*  
1025 (NZ\_AGFR000000000.1), *Acetobacter pomorum* (NZ\_AEUP000000000.1), *Gluconobacter*  
1026 *morbifer* (NZ\_AGQV000000000.1), *Providencia burhodogranariea* (NZ\_AKKL000000000.1),  
1027 *Providencia alcalifaciens* (NZ\_AKKM01000049.1), *Providencia rettgeri*  
1028 (NZ\_AJSB000000000.1), *Enterococcus faecalis* (NC\_004668.1), *Lactobacillus brevis*  
1029 (NC\_008497.1), and *Lactobacillus plantarum* (NC\_004567.2), to avoid paralogous  
1030 mapping. We used Picard (v.1.109; <http://picard.sourceforge.net>) to remove duplicate  
1031 reads and reads with a mapping quality below 20. In addition, we re-aligned sequences  
1032 flanking insertions-deletions (indels) with GATK (v3.4-46; McKenna *et al.* 2010).

1033

1034 After mapping, Pool-Seq samples were tested for DNA contamination from *D. simulans*.

1035 To do this, we used a set of SNPs known to be divergent between *D. simulans* and *D.*

1036 *melanogaster* and assessed the frequencies of *D. simulans*-specific alleles following the

1037 approach of Bastide *et al.* (2013). We combined the genomes of *D. melanogaster* (v.6.12)  
1038 and *D. simulans* (Hu *et al.* 2013) and separated species-specific reads for samples with a  
1039 contamination level > 1% via competitive mapping against the combined references using  
1040 the pipeline described above. Custom software was used to remove reads uniquely  
1041 mapping to *D. simulans*. In 9 samples, we identified contamination with *D. simulans*,  
1042 ranging between 1.2 % and 8.7% (Table S1). After applying our decontamination pipeline,  
1043 contamination levels dropped below 0.4 % in all 9 samples.

1044

1045 We used *Qualimap* (v. 2.2., Okonechnikov *et al.* 2016) to evaluate average mapping  
1046 qualities per population and chromosome, which ranged from 58.3 to 58.8 (Table S1). We  
1047 found heterogeneous sequencing depths among the 48 samples, ranging from 34x to  
1048 115x for autosomes and from 17x to 59x for X-chromosomes (Figure S1, Table S1). We  
1049 then combined individual BAM files from all samples into a single *mpileup* file using  
1050 samtools (v. 1.3; Li & Durbin 2009). Due to the large number of Pool-Seq datasets  
1051 analyzed in parallel, we had to implement quality control criteria for all libraries jointly in  
1052 order to call SNPs. To accomplish this, we implemented a novel custom SNP calling  
1053 software to call SNPs with stringent heuristic parameters (PoolSNP; see Supplementary  
1054 Information), available at Dryad (doi: <https://doi.org/10.5061/dryad.rj1qn54>). A site was  
1055 considered polymorphic if (1) the minimum coverage from all samples was greater than  
1056 10x, (2) the maximum coverage from all samples was less than the 95th coverage  
1057 percentile for a given chromosome and sample (to avoid paralogous regions duplicated in  
1058 the sample but not in the reference), (3) the minimum read count for a given allele was  
1059 greater than 20x across all samples pooled, and (4) the minimum read frequency of a  
1060 given allele was greater than 0.001 across all samples pooled. The above threshold  
1061 parameters were optimized based on simulated Pool-Seq data in order to maximize true

1062 positives and minimize false positives (see Figure S18 and Supporting Information).  
1063 Additionally, we excluded SNPs (1) for which more than 20% of all samples did not fulfill  
1064 the above-mentioned coverage thresholds, (2) which were located within 5 bp of an indel  
1065 with a minimum count larger than 10x in all samples pooled, and (3) which were located  
1066 within known transposable elements (TE) based on the *D. melanogaster* TE library v.6.10.  
1067 We further annotated our final set of SNPs with SNPeff (v.4.2; Cingolani *et al.* 2012) using  
1068 the Ensembl genome annotation version BDGP6.82 (Figure 3).

1069

### 1070 **Combined and population-specific site frequency spectra (SFS)**

1071 We quantified the amount of allelic variation with respect to different SNP classes. For this,  
1072 we first combined the full dataset across all 48 samples and used the SNPeff annotation  
1073 (see above) to classify the SNPs into four classes (intergenic, intronic, non-synonymous,  
1074 and synonymous). For each class, we calculated the site frequency spectrum (SFS) based  
1075 on minor allele frequencies for the X-chromosome and the autosomes, as well as for each  
1076 sample and chromosomal arm separately, by counting alleles in 50 frequency bins of size  
1077 0.01.

1078

### 1079 **Genetic variation in Europe**

1080 We characterized patterns of genetic variation among the 48 samples by estimating three  
1081 standard population genetic parameters:  $\pi$ , Watterson's  $\theta$  and Tajima's  $D$  (Watterson  
1082 1975; Nei 1987; Tajima 1989). We focused on SNPs located on the five major  
1083 chromosomal arms (*X*, *2L*, *2R*, *3L*, *3R*) and calculated sample-wise  $\pi$ ,  $\theta$  and Tajima's  $D$   
1084 with corrections for Pool-Seq data (Kofler *et al.* 2011). Since PoPoolation, the most  
1085 commonly used software for population genetics inference from Pool-Seq data, does not  
1086 allow using predefined SNPs (which was desirable for our analyses), we implemented

1087 corrected population genetic estimators described in Kofler *et al.* (2011) in Python  
1088 (PoolGen; available at Dryad; doi: <https://doi.org/10.5061/dryad.rj1gn54>). Before  
1089 calculating the estimators, we subsampled the data to an even coverage of 40x for the  
1090 autosomes and 20x for the X-chromosome to control for the sensitivity to coverage  
1091 variation of Watterson's  $\theta$  and Tajima's  $D$  (Korneliussen *et al.* 2013). At sites with greater  
1092 than 40x coverage, we randomly subsampled reads to 40x without replacement; at sites  
1093 with below 40x coverage, we sampled reads 40 times with replacement. Using  $R$  (R  
1094 Development Core Team 2009), we calculated sample-wise chromosome-wide averages  
1095 for autosomes and X chromosomes separately and tested for correlations of  $\pi$ ,  $\theta$  and  
1096 Tajima's  $D$  with latitude, longitude, altitude, and season using a linear regression model of  
1097 the following form:  $y_i = Lat + Lon + Alt + Season + \varepsilon_i$ , where  $y_i$  is either  $\pi$ ,  $\theta$  and  $D$ . Here,  
1098 latitude, longitude, and altitude are continuous predictors (Table 1), while 'season' is a  
1099 categorical factor with two levels S ("summer") and F ("fall"), corresponding to collection  
1100 dates before and after September 1<sup>st</sup>, respectively. We chose this arbitrary threshold for  
1101 consistency with previous studies (Bergland *et al.* 2014; Kapun *et al.* 2016a). To further  
1102 test for residual spatio-temporal autocorrelation among the samples (Kühn & Dormann  
1103 2012), we calculated Moran's  $I$  (Moran 1950) with the  $R$  package *spdep* (v.06-15., Bivand  
1104 & Piras 2015). To do this, we used the residuals of the above-mentioned models, as well  
1105 as matrices defining pairs of samples as neighbors weighted by geographical distances  
1106 between the locations (samples within 10° latitude/longitude were considered neighbors).  
1107 Whenever these tests revealed significant autocorrelation (indicating non-independence of  
1108 the samples), we repeated the above-mentioned regressions using spatial error models as  
1109 implemented in the  $R$  package *spdep*, which incorporate spatial effects through weighted  
1110 error terms, as described above.  
1111

1112 To test for confounding effects of variation in sequencing errors between runs, we  
1113 extended the above-mentioned linear models including the run ID as a random factor  
1114 using the *R* package *lme4* (v.1.1-14; see Supporting Information). Preliminary analyses  
1115 showed that this model was not significantly better than simpler models, so we did not  
1116 include sequencing run in the final analysis (see Supporting information and Table S4).  
1117  
1118 To investigate genome-wide patterns of variation, we averaged  $\pi$ ,  $\theta$ , and  $D$  in 200 kb non-  
1119 overlapping windows for each sample and chromosomal arm separately and plotted the  
1120 distributions in *R*. In addition, we calculated Tajima's  $D$  in 50 kb sliding windows with a  
1121 step size of 10 kb to investigate fine-scale deviations from neutral expectations. We  
1122 applied heuristic parameters to identify genomic regions harboring potential candidates for  
1123 selective sweeps. To identify candidate regions with sweep patterns across most of the 48  
1124 samples, we searched for windows with log-transformed recombination rates  $\geq 0.5$ ,  
1125 pairwise nucleotide diversity ( $\pi \leq 0.004$ ), and average Tajima's  $D$  across all populations  $\leq$   
1126 0.8 (5% percentile). To identify potential selective sweeps restricted to a few population  
1127 samples only, we searched for regions characterized as above but allowing one or more  
1128 samples with Tajima's  $D$  being more than two standard deviations smaller than the  
1129 window-wise average. To account for the effects of strong purifying selection in gene-rich  
1130 genomic regions which can result in local negative Tajima's  $D$  (Tajima 1989) and thus  
1131 confound the detection of selective sweeps, we repeated the analysis based on silent sites  
1132 (4-fold degenerate sites, SNPs in short introns of  $\leq 60$  bp lengths and SNPs in intergenic  
1133 regions in  $\geq 2000$  bp distance to the closest gene) only. Despite of the reduction in  
1134 polymorphic sites available for this analysis, we found highly consistent sweep regions and  
1135 therefore proceeded with the full SNP datasets, which provided better resolution (results not  
1136 shown).



1137

1138 For statistical analysis, the diversity statistics were log-transformed to normalize the data.  
1139 We then tested for correlations between  $\pi$  and recombination rate using  $R$  in 100 kb non-  
1140 overlapping windows and plotted these data using the *ggplot2* package (v.2.2.1., Wickham  
1141 2016). We used two different recombination rate measurements: (i) a fine-scale, high  
1142 resolution genomic recombination rate map based on millions of SNPs in a small number  
1143 of strains (Comeron *et al.* 2012), and (ii) the broad-scale Recombination Rate Calculator  
1144 based on Marey maps generated by laboratory cross data fitting genetic and physical  
1145 positions of 644 markers to a third-order polynomial curve for each chromosome arm  
1146 (Fiston-Lavier *et al.* 2010). Both measurements were converted to version 6 of the *D.*  
1147 *melanogaster* reference genome to match the genomic position of  $\pi$  estimates (see  
1148 above).

1149

#### 1150 **SNP counts and overlap with other datasets**

1151 We used the panel of SNPs identified in the *DrosEU* dataset (available at Dryad; doi:  
1152 <https://doi.org/10.5061/dryad.rj1gn54>) to describe the overlap in SNP calls with other  
1153 published *D. melanogaster* population data: the *Drosophila* Population Genomics Project 3  
1154 (DPGP3) from Siavonga, Zambia (69 non-admixed lines; Lack *et al.* 2015; 2016) and the  
1155 *Drosophila* Genetic Reference Panel (DGRP) from Raleigh, North Carolina, USA (205  
1156 inbred lines; Mackay *et al.* 2012; Huang *et al.* 2014). For these comparisons, we focused  
1157 on biallelic SNPs on the 5 major chromosome arms. We used *bwa mem* for mapping and  
1158 a custom pipeline for heuristic SNP calling (PoolSNP; Figure 3). To make the data from  
1159 the 69 non-admixed lines from Zambia (Lack *et al.* 2015; 2016) comparable to our data,  
1160 we reanalyzed these data using our pipeline for mapping and variant calling (Figure 3).  
1161 The VCF file of the DGRP data was downloaded from <http://dgrp2.gnets.ncsu.edu/> and

1162 converted to coordinates according to the *D. melanogaster* reference genome v.6. We  
1163 depicted the overlap of SNPs called in the three different populations using elliptic Venn  
1164 diagrams with *eulerAPE* software (v3 3.0.0., Micallef & Rodgers 2014). While the *DrosEU*  
1165 data were generated from sequencing pools of wild-caught individuals, both the DGRP  
1166 and DPGP3 data are based on individual sequencing of inbred lines and haploid  
1167 individuals, respectively.

1168

### 1169 **Genetic differentiation and population structure in European populations**

1170 To estimate genome-wide pairwise genetic differences, we used custom software to  
1171 calculate SNP-wise  $F_{ST}$  using the approach of Weir and Cockerham (1984). We estimated  
1172 SNP-wise  $F_{ST}$  for all possible pairwise combinations among samples. For each sample, we  
1173 then averaged  $F_{ST}$  across all SNPs for all pairwise combinations that include this particular  
1174 sample and finally ranked the 48 population samples by overall differentiation.

1175

1176 We inferred demographic patterns in European populations by focusing on 20,008  
1177 putatively neutrally evolving SNPs located in small introns (less than 60 bp length; Haddrill  
1178 *et al.* 2005; Singh *et al.* 2009; Parsch *et al.* 2010; Clemente & Vogl 2012; Lawrie *et al.*  
1179 2013) that were at least 200 kb distant from the major chromosomal inversions (see  
1180 below). To assess isolation by distance (IBD), we averaged  $F_{ST}$  values for each sample  
1181 pair across all neutral markers and calculated geographic distances between samples  
1182 using the haversine formula (Green & Smart 1985) which takes the spherical curvature of  
1183 the planet into account. We tested for correlations between genetic differentiation and  
1184 geographic distance using Mantel tests using the *R* package *ade4* (v.1.7-8., Dray & Dufour  
1185 2007) with 1,000,000 iterations. In addition, we plotted the 5% smallest and 5% largest  $F_{ST}$   
1186 values from all 1,128 pairwise comparisons among the 48 population samples onto a map

1187 to visualize geographic patterns of genetic differentiation. From these putatively neutral  
1188 SNPs, we used observed  $F_{ST}$  on the autosomes ( $F_{aut}$ ) to calculate the expected  $F_{ST}$  on X  
1189 chromosomes ( $F_X$ ) as in Machado *et al.* (2016) using the equation

1190

1191 
$$F_X = 1 - \left[ \frac{9(z+1) * (1 - F_{aut})}{8(2z+1) - (1 - F_{aut}) * (7z-1)} \right]$$

1192

1193 where  $z$  is the ratio of effective population sizes of males ( $N_m$ ) and females ( $N_f$ ),  $N_m/N_f$   
1194 (Ramachandran *et al.* 2004). For the purposes of this study we assume  $z = 1$ .

1195

1196 We further investigated genetic variation in our dataset by principal component analysis  
1197 (PCA) based on allele frequencies of the neutral marker SNPs described above. We used  
1198 the *R* package *LEA* (v. 1.2.0., Frichot *et al.* 2013) and performed PCA on unscaled allele  
1199 frequencies as suggested by Menozzi *et al.* (1978) and Novembre and Stephens (2008).  
1200 We focused on the first three principal components (PCs) and employed a model-based  
1201 approach as implemented in the *R* package *mclust* (v. 5.2., Fraley & Raftery 2012) to  
1202 identify the most likely number of clusters based on maximum likelihood and assigned  
1203 population samples to clusters by *k*-means clustering in *R* (R Development Core Team  
1204 2009). Finally, we examined the first three PCs for correlations with latitude, longitude,  
1205 altitude, and season using general linear models and tested for spatial autocorrelation as  
1206 described above. A Bonferroni-corrected  $\alpha$  threshold ( $\alpha' = 0.05/3 = 0.017$ ) was used to  
1207 account for multiple testing.

1208

## 1209 **Mitochondrial DNA**

1210 To obtain consensus mitochondrial sequences for each of the 48 European populations,  
1211 reads from individual FASTQ files were aligned and minor variants replaced by the major

1212 variant using *Coral* (Salmela & Schröder 2011). This way, ambiguities that might prevent  
1213 the growth of contigs from reads during the assembly process can be eliminated. For each  
1214 population, a genome assembly was obtained using *SPAdes* using standard parameters  
1215 and *k*-mers of size 21, 33, 55, and 77 (Bankevich *et al.* 2012) and the corrected FASTQ  
1216 files. Mitochondrial contigs were retrieved by *blastn*, using the *D. melanogaster* NC  
1217 024511 sequence as a query and each genome assembly as the database. To avoid  
1218 nuclear mitochondrial DNA segments (*numts*), we ensured that only contigs with a much  
1219 higher coverage than the average coverage of the genome were retrieved. When multiple  
1220 contigs were available for the same region, the one with the highest coverage was  
1221 selected. Possible contamination with *D. simulans* was assessed by looking for two or  
1222 more consecutive sites that show the same variant as *D. simulans* and looking for  
1223 alternative contigs for that region with similar coverage. As an additional quality control  
1224 measure, we also examined the presence of pairs of sites showing four gametic types  
1225 using *DNAsp 6* (Rozas *et al.* 2017) – given that there is no recombination in mitochondrial  
1226 DNA no such sites are expected. The very few sites presenting such features were  
1227 rechecked by looking for alternative contigs for that region and were corrected if needed.  
1228 The uncorrected raw reads for each population were mapped on top of the different  
1229 consensus haplotypes using *Express* as implemented in *Trinity* (Grabherr *et al.* 2011). If  
1230 most reads for a given population mapped to the consensus sequence derived for that  
1231 population the consensus sequence was retained, otherwise it was discarded as a  
1232 possible chimera between different mitochondrial haplotypes. The repetitive mitochondrial  
1233 hypervariable region is difficult to assemble and was therefore not used; the mitochondrial  
1234 region was thus analyzed as in Cooper *et al.* (2015). Mitochondrial genealogy was  
1235 estimated using statistical parsimony (TCS network; Clement *et al.* 2000), as implemented  
1236 in *PopArt* (<http://popart.otago.ac.nz>), and the surviving mitochondrial haplotypes.

1237 Frequencies of the different mitochondrial haplotypes were estimated from FPKM values  
1238 using the surviving mitochondrial haplotypes and expressed as implemented in *Trinity*  
1239 (Grabherr *et al.* 2011).

1240

### 1241 **Transposable elements**

1242 To quantify the transposable element (TE) abundance in each sample, we assembled and  
1243 quantified the repeats from unassembled sequenced reads using *dnaPipeTE* (v.1.2. ,  
1244 Goubert *et al.* 2015). The vast majority of high-quality trimmed reads were longer than 135  
1245 bp. We thus discarded reads less than 135 bp before sampling. Reads matching mtDNA  
1246 were filtered out by mapping to the *D. melanogaster* reference mitochondrial genome  
1247 (NC\_024511.2. 1) with *bowtie2* (v. 2.1.0., Langmead & Salzberg 2012). Prokaryotic  
1248 sequences, including reads from symbiotic bacteria such as *Wolbachia*, were filtered out  
1249 from the reads using the implementation of *blastx* (translated nucleic vs. protein database)  
1250 vs. the non-redundant protein database (nr) using *DIAMOND* (v. 0.8.7., Buchfink *et al.*  
1251 2015). To quantify TE content, we subsampled a proportion of the raw reads (after  
1252 filtering) corresponding to a genome coverage of 0.1X (assuming a genome size of 175  
1253 MB), and then assembled these reads with *Trinity* assembler (Grabherr *et al.* 2011). Due  
1254 to the low coverage of the genome obtained with the subsampled reads, only repetitive  
1255 DNA present in multiple copies should be fully assembled (Goubert *et al.* 2015). We  
1256 repeated this process with three iterations per sample, as recommended by the program  
1257 guidelines, to assess the repeatability of the estimates.

1258

1259 We further estimated frequencies of previously characterized TEs present in the reference  
1260 genome with *T-lex2* (v. 2.2.2., Fiston-Lavier *et al.* 2015), using all annotated TEs (5,416  
1261 TEs) in version 6.04 of the *D. melanogaster* genome from flybase.org (Gramates *et al.*

1262 2017). For 108 of these TEs, we used the corrected coordinates as described in Fiston-  
1263 Lavier *et al.* (2015), based on the identification of target site duplications at the site of the  
1264 insertion. We excluded TEs nested or flanked by other TEs (<100 bp on each side of the  
1265 TE), and TEs which are part of segmental duplications, since *T-lex2* does not provide  
1266 accurate frequency estimates in complex regions (Fiston-Lavier *et al.* 2015). We  
1267 additionally excluded the INE-1 TE family, as this TE family is ancient, with thousands of  
1268 insertions in the reference genome, which appear to be mostly fixed (2,234 TEs; Kapitonov  
1269 & Jurka 2003).

1270

1271 After applying these filters, we were able to estimate frequencies of 1,630 TE insertions  
1272 from 113 families from the three main orders, LTR, non-LTR, and DNA across all *DrosEU*  
1273 samples. *T-lex2* contains three main modules: (i) the presence detection module, (ii) the  
1274 absence detection module, and (iii) the combine module, which joins the results from the  
1275 former two detection modules. In the presence module, *T-lex2* uses *Maq* (v. 0.7.1., Li *et al.*  
1276 2008) for the mapping of reads. As *Maq* only accepts reads 127 bp or shorter, we cut the  
1277 trimmed reads following the general pipeline (Figure 3) and then used *Trimmomatic* (v.  
1278 0.35; Bolger *et al.* 2014) to cut trimmed reads longer than 100 bp into two equally sized  
1279 fragments using CROP and HEADCROP parameters. Only the presence module was run  
1280 with the cut reads.

1281

1282 To avoid inaccurate TE frequency estimates due to very low numbers of reads, we only  
1283 considered frequency estimates based on at least 3 reads. Despite the stringency of *T-*  
1284 *lex2* to select only high-quality reads, we additionally discarded frequency estimates  
1285 supported by more than 90 reads, i.e. 3 times the average coverage of the sample with the  
1286 lowest coverage (CH\_Cha\_14\_43, Table 1), in order to avoid non-unique mapping reads.

1287 This filtering allows to estimate TE frequencies for ~96% (92.9% to 97.8%) of the TEs in  
1288 each population. For 85% of the TEs, we were able to estimate their frequencies in more  
1289 than 44 out of 48 *DrosEU* samples.

1290

1291 We tested for correlations between TE insertion frequencies and recombination rates  
1292 using Spearman's rank correlations as implemented in *R*. For SNPs, we used  
1293 recombination rates from Comeron *et al.* (2012) and from the Recombination Rate  
1294 Calculator (Fiston-Lavier *et al.* 2010) in non-overlapping 100 kb windows, and assigned to  
1295 each TE insertion the recombination rate of the corresponding 100 kb genomic window.  
1296 To test for spatio-temporal variation of TE insertions, we excluded TEs with an interquartile  
1297 range (IQR) < 10. There were 141 TE insertions with variable population frequencies  
1298 among the *DrosEU* samples. We tested the population frequencies of these insertions for  
1299 correlations with latitude, longitude, altitude, and season using generalized linear models  
1300 (ANCOVA) following the method used for SNPs but with a binomial error structure in *R*.  
1301 We also tested for residual spatio-temporal autocorrelations, with Moran's *I* test (Moran  
1302 1950; Kühn & Dormann 2012). We used Bonferroni corrections to account for multiple  
1303 testing ( $\alpha' = 0.05/141 = 0.00035$ ) and only considered Bonferroni-corrected p-values <  
1304 0.001 to be significant. TEs with a recombination rate that differed from 0 cM/Mb according  
1305 to both used measures (see above) were considered as high recombination regions. To  
1306 test TE family enrichment among the significant TEs we performed a  $\chi^2$  test and applied  
1307 Yate's correction to account for the low number of some of the cells.

1308

### 1309 **Inversion polymorphisms**

1310 Since Pool-Seq data precludes a direct assessment of the presence and frequencies of  
1311 chromosomal inversions, we indirectly estimated inversion frequencies using a panel of

1312 approximately 400 inversion-specific marker SNPs (Kapun *et al.* 2014) for six  
1313 cosmopolitan inversions (*In(2L)t*, *In(2R)NS*, *In(3L)P*, *In(3R)C*, *In(3R)Mo*, *In(3R)Payne*). We  
1314 averaged allele frequencies of these markers in each sample separately. To test for clinal  
1315 variation in the frequencies of inversions, we tested for correlations with latitude, longitude,  
1316 altitude and season using generalized linear models with a binomial error structure in *R* to  
1317 account for the biallelic nature of karyotype frequencies. In addition, we tested for residual  
1318 spatio-temporal autocorrelations as described above and Bonferroni-corrected the  $\alpha$   
1319 threshold ( $\alpha' = 0.05/7 = 0.007$ ) to account for multiple testing.

1320

## 1321 **Microbiome**

1322 Raw sequences were trimmed and quality filtered as described for the genomic data  
1323 analysis. The remaining high quality sequences were mapped against the *D. melanogaster*  
1324 genome (v.6.04) including mitochondria using bbmap (v. 35; Bushnell 2016) with standard  
1325 settings. The unmapped sequences were submitted to the online classification tool,  
1326 MGRAST (Meyer *et al.* 2008) for annotation. Taxonomy information was downloaded and  
1327 analyzed in *R* (v. 3.2.3; R Development Core Team 2009) using the matR (v. 0.9;  
1328 Braithwaite & Keegan) and RJSONIO (v. 1.3; Lang) packages. Metazoan sequence  
1329 features were removed. For microbial load comparisons, the number of protein features  
1330 identified by MGRAST for each taxon and sample was divided by the number of  
1331 sequences that mapped to *D. melanogaster* chromosomes *X*, *Y*, *2L*, *2R*, *3L*, *3R* and *4*.

1332

1333 We also surveyed the datasets for the presence of novel DNA viruses by performing *de*  
1334 *novo* assembly of the non-fly reads using SPAdes 3.9.0 (Bankevich *et al.* 2012), and using  
1335 conceptual translations to query virus proteins from Genbank using DIAMOND 'blastp'  
1336 (Buchfink *et al.* 2015). In three cases (*Kallithea* virus, *Vesanto* virus, *Viltain* virus), reads



1337 from a single sample pool were sufficient to assemble a (near) complete genome. In two  
1338 other cases, fragmentary assemblies allowed us to identify additional publicly available  
1339 datasets that contained sufficient reads to complete the genomes (*Linville Road* virus,  
1340 *Esparto* virus; completed using SRA datasets SRR2396966 and SRR3939042,  
1341 respectively). Novel viruses were provisionally named based on the localities where they  
1342 were first detected, and the corresponding novel genome sequences were submitted to  
1343 Genbank (KX130344, KY608910, KY457233, KX648533-KX648536). To assess the  
1344 relative amount of viral DNA, unmapped (non-fly) reads from each sample pool were  
1345 mapped to repeat-masked *Drosophila* DNA virus genomes using bowtie2, and coverage  
1346 normalized relative to virus genome length and the number of mapped *Drosophila* reads.

1347

## 1348 **Acknowledgments**

1349 We are grateful to all members of the *DrosEU* and Dros-RTEC consortia and to Dmitri  
1350 Petrov (Stanford University) for support and discussion. *DrosEU* is funded by a Special  
1351 Topic Networks (STN) grant from the European Society for Evolutionary Biology (ESEB).  
1352 Computational analyses were partially executed at the Vital-IT bioinformatics facility of the  
1353 University of Lausanne (Switzerland) and at the computing facilities of the CC  
1354 LBBE/PRABI in Lyon (France).

1355

## 1356 **Additional information**

### 1357 **Funding**

| <b>Funder</b>                                           | <b>Grant reference number</b> | <b>Author</b>   |
|---------------------------------------------------------|-------------------------------|-----------------|
| University of Freiburg Research<br>Innovation Fund 2014 |                               | Fabian Staubach |

|                                                                    |                               |                              |
|--------------------------------------------------------------------|-------------------------------|------------------------------|
| Academy of Finland                                                 | #268241                       | Maaria Kankare               |
| Academy of Finland                                                 | #272927                       | Maaria Kankare               |
| Russian Foundation of Basic Research                               | #15-54-46009 CT_a             | Elena G. Pasyukova           |
| Danish Natural Science Research Council                            | 4002-00113                    | Volker Loeschcke             |
| Ministerio de Economía y Competitividad                            | CTM2017-88080 (AEI/FEDER, UE) | Marta Pascual                |
| CNRS                                                               | UMR 9191                      | Catherine Montchamp-Moreau   |
| Vetenskapsrådet                                                    | 2011-05679                    | Jessica Abbott               |
| Vetenskapsrådet                                                    | 2015-04680                    | Jessica Abbott               |
| Emmy Noether Programme of the Deutsche Forschungsgemeinschaft, DFG | PO 1648/3-1                   | Nico Posnien                 |
| National Institute of Health (NIH)                                 | R35GM119686                   | Alan O. Bergland             |
| Ministerio de Economía y Competitividad                            | CGL2013-42432-P               | Maria Pilar Garcia Guerreiro |
| Scientific and Technological Research Council of Turkey (TUBITAK)  | #214Z238                      | Banu Sebnem Onder            |
| ANR Exhyb                                                          | 14-CE19-0016                  | Cristina Vieira              |
| Network of Excellence LifeSpan                                     | FP6 036894                    | Bas J. Zwaan                 |
| IDEAL                                                              | FP7/2007-2011/259679          | Bas J. Zwaan                 |
| Israel Science Foundation                                          | 1737/17                       | Eran Tauber                  |
| National Institute of Health (NIH)                                 | R01GM100366                   | Paul S. Schmidt              |

|                                                                   |                           |                      |
|-------------------------------------------------------------------|---------------------------|----------------------|
| Deutsche Forschungsgemeinschaft                                   | PA 903/8-1                | John Parsch          |
| Austrian Science Fund (FWF)                                       | P27048                    | Andrea J. Betancourt |
| Biotechnology and Biological Sciences<br>Research Council (BBSRC) | BB/P00685X/1              | Andrea J. Betancourt |
| Swiss National Science Foundation<br>(SNSF)                       | PP00P3_133641             | Thomas Flatt         |
| Swiss National Science Foundation<br>(SNSF)                       | PP00P3_165836             | Thomas Flatt         |
| European Commission H2020-ERC-2014                                | CoG-647900                | Josefa Gonzàlez      |
| Ministerio de Economía y<br>Competitividad                        | FEDER BFU2014-57779-<br>P | Josefa Gonzàlez      |

1358

1359 **Author contributions**

1360 Martin Kapun, Visualization, Writing-original draft preparation, Formal analysis,  
1361 Conceptualization, Writing-review & editing, Supervision, Methodology, Investigation, Data  
1362 curation, Project administration, Validation, Resources, Software; Maite G. Barrón,  
1363 Visualization, Writing-original draft preparation, Formal analysis, Conceptualization,  
1364 Writing-review & editing, Methodology, Investigation, Data curation, Project administration,  
1365 Validation, Resources, Software; Fabian Staubach, Visualization, Writing-original draft  
1366 preparation, Formal analysis, Conceptualization, Writing-review & editing, Supervision,  
1367 Funding acquisition, Methodology, Investigation, Data curation, Validation, Resources,  
1368 Software; Jorge Vieira, Visualization, Writing-original draft preparation, Formal analysis,  
1369 Conceptualization, Writing-review & editing, Methodology, Investigation, Validation,  
1370 Resources; Darren J. Obbard, Writing-original draft preparation, Formal analysis,  
1371 Conceptualization, Writing-review & editing, Methodology, Investigation, Validation,

1372 Resources; Clément Goubert, Visualization, Writing-original draft preparation, Formal  
1373 analysis, Conceptualization, Writing-review & editing, Investigation, Resources; Omar  
1374 Rota-Stabelli, Visualization, Writing-original draft preparation, Formal analysis,  
1375 Conceptualization, Writing-review & editing, Methodology, Investigation, Resources;  
1376 Maaria Kankare, Writing-original draft preparation, Conceptualization, Writing-review &  
1377 editing, Methodology, Investigation, Resources; Annabelle Haudry, Writing-original draft  
1378 preparation, Formal analysis, Conceptualization, Writing-review & editing, Investigation,  
1379 Validation, Resources; R. Axel W. Wiberg, Writing-original draft preparation, Formal  
1380 analysis, Conceptualization, Writing-review & editing, Methodology, Investigation,  
1381 Resources, Software; Lena Waidele, Svitlana Serga, Patricia Gibert, Damiano Porcelli,  
1382 Sonja Grath, Eliza Argyridou, Lain Guio, Mads Fristrup Schou, Conceptualization, Writing-  
1383 review & editing, Investigation, Resources; Iryna Kozeretska, Conceptualization, Writing-  
1384 review & editing, Methodology, Investigation, Resources; Elena G. Pasyukova, Marta  
1385 Pascual, Alan O. Bergland, Conceptualization, Writing-review & editing, Funding  
1386 acquisition, Methodology, Investigation, Resources; Volker Loeschcke, Catherine  
1387 Montchamp-Moreau, Jessica Abbott, Nico Posnien, Maria Pilar Garcia Guerreiro, Banu  
1388 Sebnem Onder, Conceptualization, Writing-review & editing, Funding acquisition,  
1389 Investigation, Resources; Cristina P. Vieira, Visualization, Formal analysis,  
1390 Conceptualization, Writing-review & editing, Investigation, Resources; Élio Sucena,  
1391 Conceptualization, Writing-review & editing, Methodology, Investigation, Project  
1392 administration, Resources; Cristina Vieira, Michael G. Ritchie, Thomas Flatt, Josefa  
1393 González, Writing-original draft preparation, Conceptualization, Writing-review & editing,  
1394 Supervision, Funding acquisition, Methodology, Investigation, Project administration,  
1395 Validation, Resources; Bart Deplancke, Conceptualization, Writing-review & editing,  
1396 Funding acquisition, Investigation; Bas J. Zwaan, Visualization, Writing-original draft

1397 preparation, Conceptualization, Writing-review & editing, Supervision, Funding acquisition,  
1398 Methodology, Investigation, Project administration; Eran Tauber, Writing-original draft  
1399 preparation, Conceptualization, Writing-review & editing, Funding acquisition,  
1400 Methodology, Investigation, Resources; Dorcas J. Orengo, Eva Puerma,  
1401 Conceptualization, Writing-review & editing, Investigation, Validation, Resources;  
1402 Montserrat Aguadé, Writing-original draft preparation, Conceptualization, Writing-review &  
1403 editing, Methodology, Investigation, Validation, Resources; Paul S. Schmidt, John Parsch,  
1404 Writing-original draft preparation, Conceptualization, Writing-review & editing, Funding  
1405 acquisition, Methodology, Investigation, Validation, Resources; Andrea J. Betancourt,  
1406 Writing-original draft preparation, Formal analysis, Conceptualization, Writing-review &  
1407 editing, Supervision, Funding acquisition, Methodology, Investigation, Project  
1408 administration, Validation, Resources

1409

1410 **Author ORCIDs**

| <b>Names</b>       | <b>ORCID</b>        |
|--------------------|---------------------|
| Martin Kapun       | 0000-0002-3810-0504 |
| Maite G. Barrón    | 0000-0001-6146-6259 |
| Fabian Staubach    | 0000-0002-8097-2349 |
| Jorge Vieira       | 0000-0001-7032-5220 |
| Darren J. Obbard   | 0000-0001-5392-8142 |
| Clément Goubert    | 0000-0001-8034-5559 |
| Omar Rota-Stabelli | 0000-0002-0030-7788 |
| Maaria Kankare     | 0000-0003-1541-9050 |
| Annabelle Haudry   | 0000-0001-6088-0909 |
| R. Axel W. Wiberg  | 0000-0002-8074-8670 |

|                              |                     |
|------------------------------|---------------------|
| Lena Waidele                 | 0000-0002-6323-6438 |
| Iryna Kozeretska             | 0000-0002-6485-1408 |
| Elena G. Pasyukova           | 0000-0002-6491-8561 |
| Volker Loeschcke             | 0000-0003-1450-0754 |
| Marta Pascual                | 0000-0002-6189-0612 |
| Cristina P. Vieira           | 0000-0002-7139-2107 |
| Svitlana Serga               | 0000-0003-1875-3185 |
| Catherine Montchamp-Moreau   | 0000-0002-5044-9709 |
| Jessica Abbott               | 0000-0002-8743-2089 |
| Patricia Gibert              | 0000-0002-9461-6820 |
| Damiano Porcelli             | 0000-0002-9019-5758 |
| Nico Posnien                 | 0000-0003-0700-5595 |
| Sonja Grath                  | 0000-0003-3621-736X |
| Élio Sucena                  | 0000-0001-8810-870X |
| Alan O. Bergland             | 0000-0001-7145-7575 |
| Maria Pilar Garcia Guerreiro | 000-0001-9951-1879X |
| Banu Sebnem Onder            | 0000-0002-3003-248X |
| Eliza Argyridou              | 0000-0002-6890-4642 |
| Lain Guio                    | 0000-0002-5481-5200 |
| Mads Fristrup Schou          | 0000-0001-5521-5269 |
| Bart Deplancke               | 0000-0001-9935-843X |
| Cristina Vieira              | 0000-0003-3414-3993 |
| Michael G. Ritchie           | 0000-0001-7913-8675 |
| Bas J. Zwaan                 | 0000-0002-8221-4998 |
| Eran Tauber                  | 0000-0003-4018-6535 |

|                      |                     |
|----------------------|---------------------|
| Dorcas J. Orengo     | 0000-0001-7911-3224 |
| Eva Puerma           | 0000-0001-7261-187X |
| Montserrat Aguadé    | 0000-0002-3884-7800 |
| Paul S. Schmidt      | 0000-0002-8076-6705 |
| John Parsch          | 0000-0001-9068-5549 |
| Andrea J. Betancourt | 0000-0001-9351-1413 |
| Thomas Flatt         | 0000-0002-5990-1503 |
| Josefa González      | 0000-0001-9824-027X |

1411

## 1412 **References**

- 1413 Adrian AB, Comeron JM (2013) The *Drosophila* early ovarian transcriptome provides  
1414 insight to the molecular causes of recombination rate variation across genomes. *BMC*  
1415 *Genomics*, **14**, 794.
- 1416 Adrion JR, Hahn MW, Cooper BS (2015) Revisiting classic clines in *Drosophila*  
1417 *melanogaster* in the age of genomics. *Trends in Genetics*, **31**, 434–444.
- 1418 Alonso-Blanco C, Andrade J, Becker C *et al.* (2016) 1,135 Genomes Reveal the Global  
1419 Pattern of Polymorphism in *Arabidopsis thaliana*. **166**, 481–491.
- 1420 Anderson AR, Hoffmann AA, McKechnie SW, Umina PA, Weeks AR (2005) The latitudinal  
1421 cline in the *In(3R)Payne* inversion polymorphism has shifted in the last 20 years in  
1422 Australian *Drosophila melanogaster* populations. *Molecular Ecology*, **14**, 851–858.
- 1423 Anderson PR, Knibb WR, Oakeshott JG (1987) Observations on the extent and temporal  
1424 stability of latitudinal clines for alcohol dehydrogenase allozymes and four  
1425 chromosome inversions in *Drosophila melanogaster*. *Genetica*, **75**, 81–88.

- 1426 Anderson WW, Arnold J, Baldwin DG *et al.* (1991) Four decades of inversion  
1427 polymorphism in *Drosophila pseudoobscura*. *Proceedings of the National Academy of*  
1428 *Sciences of the United States of America*, **88**, 10367–10371.
- 1429 Andolfatto P, Wall JD, Kreitman M (1999) Unusual haplotype structure at the proximal  
1430 breakpoint of *In(2L)t* in a natural population of *Drosophila melanogaster*. *Genetics*,  
1431 **153**, 1297–1311.
- 1432 Ashburner M, Lemeunier F (1976) Relationships within the melanogaster Species  
1433 Subgroup of the Genus *Drosophila* (Sophophora). I. Inversion Polymorphisms in  
1434 *Drosophila melanogaster* and *Drosophila simulans*. *Proceedings of the Royal Society*  
1435 *of London. Series B: Biological Sciences*, **193**, 137–157.
- 1436 Aulard S, David JR, Lemeunier F (2002) Chromosomal inversion polymorphism in  
1437 Afrotropical populations of *Drosophila melanogaster*. *Genetic Research*, **79**, 49–63.
- 1438 Bankevich A, Nurk S, Antipov D *et al.* (2012) *SPAdes, a New Genome Assembly*  
1439 *Algorithm and Its Applications to Single-cell Sequencing (7th Annual SFAF Meeting,*  
1440 *2012)*. Mary Ann Liebert, Inc. 140 Huguenot Street, 3rd Floor New Rochelle, NY  
1441 10801 USA.
- 1442 Barata A, Santos SC, Malfeito-Ferreira M, Loureiro V (2012) New insights into the  
1443 ecological interaction between grape berry microorganisms and *Drosophila* flies during  
1444 the development of sour rot. *Microbial ecology*, **64**, 416–430.
- 1445 Bartolomé C, Maside X, Charlesworth B (2002) On the Abundance and Distribution of  
1446 Transposable Elements in the Genome of *Drosophila melanogaster*. *Molecular Biology*  
1447 *and Evolution*, **19**, 926–937.
- 1448 Bastide H, Betancourt A, Nolte V *et al.* (2013) A genome-wide, fine-scale map of natural  
1449 pigmentation variation in *Drosophila melanogaster*. (P Wittkopp, Ed.). *PLoS Genetics*,  
1450 **9**, e1003534.



- 1451 Baudry E, Viginier B, Veuille M (2004) Non-African populations of *Drosophila*  
1452 *melanogaster* have a unique origin. *Molecular Biology and Evolution*, **21**, 1482–1491.
- 1453 Becher PG, Flick G, Rozpędowska E *et al.* (2012) Yeast, not fruit volatiles mediate  
1454 *Drosophila melanogaster* attraction, oviposition and development. *Functional Ecology*,  
1455 **26**, 822–828.
- 1456 Begun DJ (2015) Parallel Gene Expression Differences between Low and High Latitude  
1457 Populations of *Drosophila melanogaster* and *D. simulans*. (SV Nuzhdin, Ed.). *PLoS*  
1458 *Genetics*, **11**, e1005184.
- 1459 Begun DJ, Aquadro CF (1993) African and North American populations of *Drosophila*  
1460 *melanogaster* are very different at the DNA level. *Nature*, **365**, 548–550.
- 1461 Begun DJ, Holloway AK, Stevens K *et al.* (2007) Population Genomics: Whole-Genome  
1462 Analysis of Polymorphism and Divergence in *Drosophila simulans*. *PLoS Biology*, **5**,  
1463 e310.
- 1464 Behrman EL, Howick VM, Kapun M *et al.* (2018) Rapid seasonal evolution in innate  
1465 immunity of wild *Drosophila melanogaster*. *Proceedings of the Royal Society B:*  
1466 *Biological Sciences*, **285**, 20172599.
- 1467 Beisswanger S, Stephan W, De Lorenzo D (2006) Evidence for a Selective Sweep in the  
1468 *wapl* Region of *Drosophila melanogaster*. *Genetics*, **172**, 265–274.
- 1469 Bergland AO, Behrman EL, O'Brien KR, Schmidt PS, Petrov DA (2014) Genomic Evidence  
1470 of Rapid and Stable Adaptive Oscillations over Seasonal Time Scales in *Drosophila*.  
1471 *PLoS Genetics*, **10**, e1004775.
- 1472 Bergland AO, Tobler R, González J, Schmidt P, Petrov D (2016) Secondary contact and  
1473 local adaptation contribute to genome-wide patterns of clinal variation in *Drosophila*  
1474 *melanogaster*. *Molecular Ecology*, **25**, 1157–1174.

- 1475 Bivand R, Piras G (2015) Comparing Implementations of Estimation Methods for Spatial  
1476 Econometrics. *Journal of Statistical Software*, **63**, 1–36.
- 1477 Black WC IV, Black WC IV, Baer CF, Antolin MF, DuTeau NM (2001) Population  
1478 genomics: genome-wide sampling of insect populations. *Annual Review of*  
1479 *Entomology*.
- 1480 Blumenstiel JP, Chen X, He M, Bergman CM (2014) An Age-of-Allele Test of Neutrality for  
1481 Transposable Element Insertions. *Genetics*, **196**, 523–538.
- 1482 Boitard S, Schlötterer C, Nolte V, Pandey RV, Futschik A (2012) Detecting Selective  
1483 Sweeps from Pooled Next-Generation Sequencing Samples. *Molecular Biology and*  
1484 *Evolution*, **29**, 2177–2186.
- 1485 Bolger AM, Lohse M, Usadel B (2014) Trimmomatic: a flexible trimmer for Illumina  
1486 sequence data. *Bioinformatics*, **30**, 2114–2120.
- 1487 Boussy IA, Itoh M, Rand D, Woodruff RC (1998) Origin and decay of the P element-  
1488 associated latitudinal cline in Australian *Drosophila melanogaster*. *Genetica*, **104**, 45–  
1489 57.
- 1490 Božičević V, Hutter S, Stephan W, Wollstein A (2016) Population genetic evidence for cold  
1491 adaptation in European *Drosophila melanogaster* populations. *Molecular Ecology*, **25**,  
1492 1175–1191.
- 1493 Braithwaite DP, Keegan KP *matR: Metagenomics Analysis Tools for R*. [https://CRAN.R-](https://CRAN.R-project.org/package=matR)  
1494 [project.org/package=matR](https://CRAN.R-project.org/package=matR).
- 1495 Buchfink B, Xie C, Huson DH (2015) Fast and sensitive protein alignment using  
1496 DIAMOND. *Nature Methods*, **12**, 59–60.
- 1497 Buser CC, Newcomb RD, Gaskett AC, Goddard MR (2014) Niche construction initiates the  
1498 evolution of mutualistic interactions. *Ecology Letters*, **17**, 1257–1264.
- 1499 Bushnell B (2016) *BBMap short read aligner*. URL <http://sourceforge.net/projects/bbmap>.

- 1500 Camus MF, Wolff JN, Sgrò CM, Dowling DK (2017) Experimental Support That Natural  
1501 Selection Has Shaped the Latitudinal Distribution of Mitochondrial Haplotypes in  
1502 Australian *Drosophila melanogaster*. *Molecular Biology and Evolution*, **34**, 2600–2612.
- 1503 Caracristi G, Schlötterer C (2003) Genetic Differentiation Between American and  
1504 European *Drosophila melanogaster* Populations Could Be Attributed to Admixture of  
1505 African Alleles. *Molecular Biology and Evolution*, **20**, 792–799.
- 1506 Casillas S, Barbadilla A (2017) Molecular Population Genetics. *Genetics*, **205**, 1003–1035.
- 1507 Catania F, Kauer MO, Daborn PJ *et al.* (2004) World-wide survey of an Accord insertion  
1508 and its association with DDT resistance in *Drosophila melanogaster*. *Molecular*  
1509 *Ecology*, **13**, 2491–2504.
- 1510 Cavalli-Sforza LL (1966) Population Structure and Human Evolution. *Proceedings of the*  
1511 *Royal Society of London. Series B: Biological Sciences*, **164**, 362–379.
- 1512 Chandler JA, James PM (2013) Discovery of trypanosomatid parasites in globally  
1513 distributed *Drosophila* species. *PLoS ONE*, **8**, e61937.
- 1514 Chandler JA, Eisen JA, Kopp A (2012) Yeast communities of diverse *Drosophila* species:  
1515 comparison of two symbiont groups in the same hosts. *Applied and Environmental*  
1516 *Microbiology*, **78**, 7327–7336.
- 1517 Chandler JA, Lang JM, Bhatnagar S, Eisen JA, Kopp A (2011) Bacterial communities of  
1518 diverse *Drosophila* species: ecological context of a host-microbe model system. *PLoS*  
1519 *Genetics*, **7**, e1002272.
- 1520 Charlesworth B (2010) Molecular population genomics: a short history. *Genetical*  
1521 *Research*, **92**, 397–411.
- 1522 Charlesworth B (2015) Causes of natural variation in fitness: evidence from studies of  
1523 *Drosophila* populations. *Proceedings of the National Academy of Sciences of the*  
1524 *United States of America*, **112**, 1662–1669.

- 1525 Charlesworth B, Sniegowski P, Stephan W (1994) The evolutionary dynamics of repetitive  
1526 DNA in eukaryotes. *Nature*, **371**, 215–220.
- 1527 Cheng C, White BJ, Kamdem C *et al.* (2012) Ecological genomics of *Anopheles gambiae*  
1528 along a latitudinal cline: a population-resequencing approach. *Genetics*, **190**, 1417–  
1529 1432.
- 1530 Cingolani P, Platts A, Wang LL *et al.* (2012) A program for annotating and predicting the  
1531 effects of single nucleotide polymorphisms, SnpEff: SNPs in the genome of *Drosophila*  
1532 *melanogaster* strain *w*<sup>1118</sup>; *iso-2*; *iso-3*. *Fly (Austin)*, **6**, 80–92.
- 1533 Clement M, Posada D, Crandall KA (2000) TCS: a computer program to estimate gene  
1534 genealogies. *Molecular Ecology*, **9**, 1657–1659.
- 1535 Clemente F, Vogl C (2012) Unconstrained evolution in short introns? – An analysis of  
1536 genome-wide polymorphism and divergence data from *Drosophila*. *Journal of*  
1537 *Evolutionary Biology*, **25**, 1975–1990.
- 1538 Comeron JM, Ratnappan R, Bailin S (2012) The many landscapes of recombination in  
1539 *Drosophila melanogaster*. (DA Petrov, Ed.). *PLoS Genetics*, **8**, e1002905.
- 1540 Consortium T (2015) A global reference for human genetic variation. **526**, 68–74.
- 1541 Cooper BS, Burrus CR, Ji C, Hahn MW, Montooth KL (2015) Similar Efficacies of  
1542 Selection Shape Mitochondrial and Nuclear Genes in Both *Drosophila melanogaster*  
1543 and *Homo sapiens*. *G3 (Bethesda, Md.)*, **5**, 2165–2176.
- 1544 Corbett-Detig RB, Hartl DL (2012) Population Genomics of Inversion Polymorphisms in  
1545 *Drosophila melanogaster*. *PLoS Genetics*, **8**, e1003056.
- 1546 Corbett-Detig RB, Cardeno C, Langley CH (2012) Sequence-based detection and  
1547 breakpoint assembly of polymorphic inversions. *Genetics*, **192**, 131–137.

- 1548 Cridland JM, Macdonald SJ, Long AD, Thornton KR (2013) Abundance and distribution of  
1549 transposable elements in two *Drosophila* QTL mapping resources. *Molecular Biology*  
1550 *and Evolution*, **30**, 2311–2327.
- 1551 Daborn PJ, Yen JL, Bogwitz MR *et al.* (2002) A single p450 allele associated with  
1552 insecticide resistance in *Drosophila*. *Science*, **297**, 2253–2256.
- 1553 Das A, Singh BN (1990) Chromosome inversions in Indian *Drosophila melanogaster*.  
1554 *Genetica*, **81**, 85–88.
- 1555 Das A, Singh BN (1991) Genetic differentiation and inversion clines in Indian natural  
1556 populations of *Drosophila melanogaster*. *Genome / National Research Council Canada*  
1557 = *Génome / Conseil national de recherches Canada*, **34**, 618–625.
- 1558 David JR, Capy P (1988) Genetic variation of *Drosophila melanogaster* natural  
1559 populations. *Trends in genetics : TIG*, **4**, 106–111.
- 1560 de Jong G, Bochdanovits Z (2003) Latitudinal clines in *Drosophila melanogaster*: body  
1561 size, allozyme frequencies, inversion frequencies, and the insulin-signalling pathway.  
1562 *Journal of Genetics*, **82**, 207–223.
- 1563 Dieringer D, Nolte V, Schlötterer C (2005) Population structure in African *Drosophila*  
1564 *melanogaster* revealed by microsatellite analysis. *Molecular Ecology*, **14**, 563–573.
- 1565 Dobzhansky T (1970) *Genetics of the Evolutionary Process*. Columbia University Press.
- 1566 Dobzhansky T, Sturtevant AH (1938) Inversions in the Chromosomes of *Drosophila*  
1567 *Pseudoobscura*. *Genetics*, **23**, 28–64.
- 1568 Dray S, Dufour A-B (2007) The ade4 Package: Implementing the Duality Diagram for  
1569 Ecologists. *Journal of Statistical Software*, **22**.
- 1570 Duchon P, Zivkovic D, Hutter S, Stephan W, Laurent S (2013) Demographic inference  
1571 reveals African and European admixture in the North American *Drosophila*  
1572 *melanogaster* population. *Genetics*, **193**, 291–301.

- 1573 Ellegren H (2014) Genome sequencing and population genomics in non-model organisms.  
1574 *Trends in Ecology & Evolution*, **29**, 51–63.
- 1575 Endler JA (1977) *Geographic Variation, Speciation, and Clines*. Princeton University  
1576 Press.
- 1577 Fabian DK, Kapun M, Nolte V *et al.* (2012) Genome-wide patterns of latitudinal  
1578 differentiation among populations of *Drosophila melanogaster* from North America.  
1579 *Molecular Ecology*, **21**, 4748–4769.
- 1580 Fabian DK, Lack JB, Mathur V *et al.* (2015) Spatially varying selection shapes life history  
1581 clines among populations of *Drosophila melanogaster* from sub-Saharan Africa.  
1582 *Journal of Evolutionary Biology*, **28**, 826–840.
- 1583 Fiston-Lavier A-S, Barrón MG, Petrov DA, González J (2015) T-lex2: genotyping,  
1584 frequency estimation and re-annotation of transposable elements using single or  
1585 pooled next-generation sequencing data. *Nucleic Acids Research*, **43**, e22–e22.
- 1586 Fiston-Lavier A-S, Singh ND, Lipatov M, Petrov DA (2010) *Drosophila melanogaster*  
1587 recombination rate calculator. *Gene*, **463**, 18–20.
- 1588 Flatt T, Amdam GV, Kirkwood TBL, Omholt SW (2013) Life-history evolution and the  
1589 polyphenic regulation of somatic maintenance and survival. *The quarterly review of*  
1590 *biology*, **88**, 185–218.
- 1591 Fraley C, Raftery AE (2012) *mclust Version 4 for R: Normal Mixture Modeling for Model-*  
1592 *Based Clustering, Classification, and Density Estimation*. Seattle.
- 1593 Francalacci P, Sanna D (2008) History and geography of human Y-chromosome in  
1594 Europe: a SNP perspective. *Journal of anthropological sciences*, **86**, 59–89.
- 1595 Frichot E, Schoville SD, Bouchard G, François O (2013) Testing for associations between  
1596 loci and environmental gradients using latent factor mixed models. *Molecular Biology*  
1597 *and Evolution*, **30**, 1687–1699.

- 1598 González J, Karasov TL, Messer PW, Petrov DA (2010) Genome-Wide Patterns of  
1599 Adaptation to Temperate Environments Associated with Transposable Elements in  
1600 *Drosophila* (HS Malik, Ed.). *PLoS Genetics*, **6**, e1000905.
- 1601 González J, Lenkov K, Lipatov M, Macpherson JM, Petrov DA (2008) High Rate of Recent  
1602 Transposable Element–Induced Adaptation in *Drosophila melanogaster*. *PLoS Biology*,  
1603 **6**, e251.
- 1604 Goubert C, Modolo L, Vieira C *et al.* (2015) De Novo Assembly and Annotation of the  
1605 Asian Tiger Mosquito (*Aedes albopictus*) Repeatome with dnaPipeTE from Raw  
1606 Genomic Reads and Comparative Analysis with the Yellow Fever Mosquito (*Aedes*  
1607 *aegypti*). *Genome Biology and Evolution*, **7**, 1192–1205.
- 1608 Grabherr MG, Haas BJ, Yassour M *et al.* (2011) Full-length transcriptome assembly from  
1609 RNA-Seq data without a reference genome. *Nature Biotechnology*, **29**, 644–652.
- 1610 Gramates LS, Marygold SJ, Santos GD *et al.* (2017) FlyBase at 25: looking to the future.  
1611 *Nucleic Acids Research*, **45**, D663–D671.
- 1612 Green RM, Smart WM (1985) *Textbook on Spherical Astronomy*. Cambridge University.
- 1613 Haddrill PR, Charlesworth B, Halligan DL, Andolfatto P (2005) Patterns of intron sequence  
1614 evolution in *Drosophila* are dependent upon length and GC content. *Genome Biology*,  
1615 **6**, R67.
- 1616 Hales KG, Korey CA, Larracuente AM, Roberts DM (2015) Genetics on the Fly: A Primer  
1617 on the *Drosophila* Model System. *Genetics*, **201**, 815–842.
- 1618 Hamilton PT, Votýpka J, Dostálová A *et al.* (2015) Infection Dynamics and Immune  
1619 Response in a Newly Described *Drosophila*-Trypanosomatid Association. *mBio*, **6**,  
1620 e01356–15.
- 1621 Handu M, Kaduskar B, Ravindranathan R *et al.* (2015) SUMO-Enriched Proteome for  
1622 *Drosophila* Innate Immune Response. *G3 (Bethesda, Md.)*, **5**, 2137–2154.

- 1623 Harpur BA, Kent CF, Molodtsova D *et al.* (2014) Population genomics of the honey bee  
1624 reveals strong signatures of positive selection on worker traits. *Proceedings of the*  
1625 *National Academy of Sciences of the United States of America*, **111**, 2614–2619.
- 1626 Haselkorn TS, Markow TA, Moran NA (2009) Multiple introductions of the *Spiroplasma*  
1627 bacterial endosymbiont into *Drosophila*. *Molecular Ecology*, **18**, 1294–1305.
- 1628 Hohenlohe PA, Bassham S, Etter PD *et al.* (2010) Population Genomics of Parallel  
1629 Adaptation in Threespine Stickleback using Sequenced RAD Tags. *PLoS Genetics*, **6**,  
1630 e1000862.
- 1631 Hu TT, Eisen MB, Thornton KR, Andolfatto P (2013) A second-generation assembly of the  
1632 *Drosophila simulans* genome provides new insights into patterns of lineage-specific  
1633 divergence. *Genome Research*, **23**, 89–98.
- 1634 Huang W, Massouras A, Inoue Y *et al.* (2014) Natural variation in genome architecture  
1635 among 205 *Drosophila melanogaster* Genetic Reference Panel lines. *Genome*  
1636 *Research*, **24**, 1193–1208.
- 1637 Hudson RR, Kreitman M, Aguadé M (1987) A test of neutral molecular evolution based on  
1638 nucleotide data. *Genetics*, **116**, 153–159.
- 1639 Huszar T, Imler J-L (2008) *Drosophila* viruses and the study of antiviral host-defense.  
1640 *Advances in virus research*, **72**, 227–265.
- 1641 Hutter S, Li H, Beisswanger S, De Lorenzo D, Stephan W (2007) Distinctly Different Sex  
1642 Ratios in African and European Populations of *Drosophila melanogaster* Inferred From  
1643 Chromosomewide Single Nucleotide Polymorphism Data. *Genetics*, **177**, 469–480.
- 1644 Inoue Y, Watanabe TK (1979) Inversion polymorphisms in Japanese natural populations of  
1645 *Drosophila melanogaster*. *Japanese Journal of Genetics*, **54**, 69–82.
- 1646 Inoue Y, Watanabe T, Watanabe TK (1984) Evolutionary Change of the Chromosomal  
1647 Polymorphism in *Drosophila melanogaster* Populations. *Evolution*, **38**, 753.



- 1648 Jorde LB, Watkins WS, Bamshad MJ (2001) Population genomics: a bridge from  
1649 evolutionary history to genetic medicine. *Human Molecular Genetics*, **10**, 2199–2207.
- 1650 Kao JY, Zubair A, Salomon MP, Nuzhdin SV, Campo D (2015) Population genomic  
1651 analysis uncovers African and European admixture in *Drosophila melanogaster*  
1652 populations from the south-eastern United States and Caribbean Islands. *Molecular*  
1653 *Ecology*, **24**, 1499–1509.
- 1654 Kapitonov VV, Jurka J (2003) Molecular Paleontology of Transposable Elements in the  
1655 *Drosophila melanogaster* Genome. *Proceedings of the National Academy of Sciences*  
1656 *of the United States of America*, **100**, 6569–6574.
- 1657 Kapun M, Fabian DK, Goudet J, Flatt T (2016a) Genomic Evidence for Adaptive Inversion  
1658 Clines in *Drosophila melanogaster*. *Molecular Biology and Evolution*, **33**, 1317–1336.
- 1659 Kapun M, Schmidt C, Durmaz E, Schmidt PS, Flatt T (2016b) Parallel effects of the  
1660 inversion *In(3R)Payne* on body size across the North American and Australian clines in  
1661 *Drosophila melanogaster*. *Journal of Evolutionary Biology*, **29**, 1059–1072.
- 1662 Kapun M, van Schalkwyk H, McAllister B, Flatt T, Schlötterer C (2014) Inference of  
1663 chromosomal inversion dynamics from Pool-Seq data in natural and laboratory  
1664 populations of *Drosophila melanogaster*. *Molecular Ecology*, **23**, 1813–1827.
- 1665 Kassis JA, Kennison JA, Tamkun JW (2017) Polycomb and Trithorax Group Genes in  
1666 *Drosophila*. *Genetics*, **206**, 1699–1725.
- 1667 Keller A (2007) *Drosophila melanogaster's* history as a human commensal. *Current*  
1668 *Biology*, **17**, R77–R81.
- 1669 Kennington WJ, Hoffmann AA (2013) Patterns of genetic variation across inversions:  
1670 geographic variation in the *In(2L)t* inversion in populations of *Drosophila melanogaster*  
1671 from eastern Australia. *BMC evolutionary biology*, **13**, 100.

- 1672 Kennington WJ, Hoffmann AA, Partridge L (2007) Mapping Regions Within Cosmopolitan  
1673 Inversion *In(3R)Payne* Associated With Natural Variation in Body Size in *Drosophila*  
1674 *melanogaster*. *Genetics*, **177**, 549–556.
- 1675 Kennison J (2008) Dissection of Larval Salivary Glands and Polytene Chromosome  
1676 Preparation. *Cold Spring Harbor Protocols*, **2008**, pdb.prot4708–pdb.prot4708.
- 1677 Kimura M (1984) *The Neutral Theory of Molecular Evolution*. Cambridge University Press.
- 1678 Kirkpatrick M (2010) How and why chromosome inversions evolve. *PLoS Biology*, **8**,  
1679 e1000501.
- 1680 Knibb WR (1982) Chromosome inversion polymorphisms in *Drosophila melanogaster* II.  
1681 Geographic clines and climatic associations in Australasia, North America and Asia.  
1682 *Genetica*, **58**, 213–221.
- 1683 Knibb WR (1986) Temporal variation of *Drosophila melanogaster Adh* allele frequencies,  
1684 inversion frequencies, and population sizes. *Genetica*, **71**, 175–190.
- 1685 Knibb WR, Oakeshott JG, Gibson JB (1981) Chromosome Inversion Polymorphisms in  
1686 *Drosophila melanogaster*. I. Latitudinal Clines and Associations between Inversions in  
1687 Australasian Populations. *Genetics*, **98**, 833–847.
- 1688 Kofler R, Betancourt AJ, Schlötterer C (2012) Sequencing of pooled DNA samples (Pool-  
1689 Seq) uncovers complex dynamics of transposable element insertions in *Drosophila*  
1690 *melanogaster*. *PLoS Genetics*, **8**, e1002487.
- 1691 Kofler R, Orozco-terWengel P, De Maio N *et al.* (2011) PoPoolation: A Toolbox for  
1692 Population Genetic Analysis of Next Generation Sequencing Data from Pooled  
1693 Individuals. *PLoS ONE*, **6**, e15925.
- 1694 Kolaczkowski B, Hupalo DN, Kern AD (2011a) Recurrent adaptation in RNA interference  
1695 genes across the *Drosophila* phylogeny. *Molecular Biology and Evolution*, **28**, 1033–  
1696 1042.

- 1697 Kolaczowski B, Kern AD, Holloway AK, Begun DJ (2011b) Genomic Differentiation  
1698 Between Temperate and Tropical Australian Populations of *Drosophila melanogaster*.  
1699 *Genetics*, **187**, 245–260.
- 1700 Korneliussen TS, Moltke I, Albrechtsen A, Nielsen R (2013) Calculation of Tajima's *D* and  
1701 other neutrality test statistics from low depth next-generation sequencing data. *BMC*  
1702 *Bioinformatics*, **14**, 289.
- 1703 Kreitman M (1983) Nucleotide polymorphism at the alcohol dehydrogenase locus of  
1704 *Drosophila melanogaster*. *Nature*, **304**, 412–417.
- 1705 Kriesner P, Conner WR, Weeks AR, Turelli M, Hoffmann AA (2016) Persistence of a  
1706 *Wolbachia* infection frequency cline in *Drosophila melanogaster* and the possible role  
1707 of reproductive dormancy. *Evolution*, **70**, 979–997.
- 1708 Kunze-Mühl E, Müller E (1957) Weitere Untersuchungen über die chromosomale Struktur  
1709 und die natürlichen Strukturtypen von *Drosophila subobscura* coll. *Chromosoma*, **9**,  
1710 559–570.
- 1711 Kühn I, Dormann CF (2012) Less than eight (and a half) misconceptions of spatial  
1712 analysis. *Journal of Biogeography*, **39**, 995–998.
- 1713 Lachaise D, Cariou M-L, David JR *et al.* (1988) Historical Biogeography of the *Drosophila*  
1714 *melanogaster* Species Subgroup. In: *Evolutionary Biology*, pp. 159–225. Springer,  
1715 Boston, MA, Boston, MA.
- 1716 Lack JB, Cardeno CM, Crepeau MW *et al.* (2015) The *Drosophila* genome nexus: a  
1717 population genomic resource of 623 *Drosophila melanogaster* genomes, including 197  
1718 from a single ancestral range population. *Genetics*, **199**, 1229–1241.
- 1719 Lack JB, Lange JD, Tang AD, Corbett-Detig RB, Pool JE (2016) A Thousand Fly  
1720 Genomes: An Expanded *Drosophila* Genome Nexus. *Molecular Biology and Evolution*,  
1721 **33**, msw195–3313.

- 1722 Lang DT *RJSONIO: Serialize R objects to JSON, JavaScript Object Notation*.
- 1723 <https://CRAN.R-project.org/package=RJSONIO>.
- 1724 Langley CH, Stevens K, Cardeno C *et al.* (2012) Genomic variation in natural populations  
1725 of *Drosophila melanogaster*. *Genetics*, **192**, 533–598.
- 1726 Langmead B, Salzberg SL (2012) Fast gapped-read alignment with Bowtie 2. *Nature*  
1727 *Methods*, **9**, 357–359.
- 1728 Lavington E, Kern AD (2017) The Effect of Common Inversion  
1729 Polymorphisms in (2L) and (3R) Moon Patterns of Transcriptional Variation  
1730 in *Drosophila melanogaster*. *G3 (Bethesda, Md.)*, **7**, 3659–3668.
- 1731 Lawrie DS, Messer PW, Hershberg R, Petrov DA (2013) Strong Purifying Selection at  
1732 Synonymous Sites in *D. melanogaster*. *arXiv.org*, **q-bio.PE**, e1003527.
- 1733 Lemeunier F, Aulard S (1992) Inversion polymorphism in *Drosophila melanogaster*. In:  
1734 *Drosophila Inversion Polymorphism* (eds Krimbas CB, Powell JR), p. 576. CRC Press.
- 1735 Levins R (1968) *Evolution in Changing Environments*. Princeton University Press.
- 1736 Lewontin RC (1974) *The Genetic Basis of Evolutionary Change*. Columbia University  
1737 Press.
- 1738 Li H (2013) Aligning sequence reads, clone sequences and assembly contigs with BWA-  
1739 MEM. *arXiv.org*.
- 1740 Li H, Durbin R (2009) Fast and accurate short read alignment with Burrows-Wheeler  
1741 transform. *Bioinformatics*, **25**, 1754–1760.
- 1742 Li H, Ruan J, Durbin R (2008) Mapping short DNA sequencing reads and calling variants  
1743 using mapping quality scores. *Genome Research*, **18**, 1851–1858.
- 1744 Luikart G, England PR, Tallmon D, Jordan S, Tableret P (2003) The power and promise of  
1745 population genomics: from genotyping to genome typing. *Nature Reviews Genetics*, **4**,  
1746 981–994.

- 1747 Lyne R, Smith R, Rutherford K *et al.* (2007) FlyMine: an integrated database for  
1748 *Drosophila* and *Anopheles* genomics. *Genome Biology*, **8**, R129.
- 1749 Machado HE, Bergland AO, O'Brien KR *et al.* (2016) Comparative population genomics of  
1750 latitudinal variation in *Drosophila simulans* and *Drosophila melanogaster*. *Molecular*  
1751 *Ecology*, **25**, 723–740.
- 1752 Machado H, Bergland AO, Taylor R *et al.* (2018) Broad geographic sampling reveals  
1753 predictable and pervasive seasonal adaptation in *Drosophila*. *bioRxiv*.  
1754 <https://doi.org/10.1101/337543>
- 1755 Mackay TFC, Richards S, Stone EA *et al.* (2012) The *Drosophila melanogaster* Genetic  
1756 Reference Panel. *Nature*, **482**, 173–178.
- 1757 Martin M (2011) Cutadapt removes adapter sequences from high-throughput sequencing  
1758 reads. *EMBnet.journal*, **17**, 10–12.
- 1759 Martino ME, Ma D, Leulier F (2017) Microbial influence on *Drosophila* biology. *Current*  
1760 *Opinion in Microbiology*, **38**, 165–170.
- 1761 Mateo L, Rech GE, González J (2018) Genome-wide patterns of local adaptation in  
1762 *Drosophila melanogaster*: adding intra European variability to the map. *bioRxiv*.
- 1763 Matthias P, Yoshida M, Khochbin S (2008) HDAC6 a new cellular stress surveillance  
1764 factor. *Cell Cycle*, **7**, 7–10.
- 1765 Matzkin LM, Merritt TJS, Zhu C-T, Eanes WF (2005) The structure and population  
1766 genetics of the breakpoints associated with the cosmopolitan chromosomal inversion  
1767 *In(3R)Payne* in *Drosophila melanogaster*. *Genetics*, **170**, 1143–1152.
- 1768 McDonald JH, Kreitman M (1991) Adaptive protein evolution at the *Adh* locus in  
1769 *Drosophila*. *Nature*, **351**, 652–654.

- 1770 McKenna A, Hanna M, Banks E *et al.* (2010) The Genome Analysis Toolkit: A MapReduce  
1771 framework for analyzing next-generation DNA sequencing data. *Genome Research*,  
1772 **20**, 1297–1303.
- 1773 Menozzi P, Piazza A, Cavalli-Sforza L (1978) Synthetic maps of human gene frequencies  
1774 in Europeans. *Science*, **201**, 786–792.
- 1775 Messer PW, Petrov DA (2013) Population genomics of rapid adaptation by soft selective  
1776 sweeps. **28**, 659–669.
- 1777 Mettler LE, Voelker RA, Mukai T (1977) Inversion Clines in Populations of *Drosophila*  
1778 *melanogaster*. *Genetics*, **87**, 169–176.
- 1779 Meyer F, Paarmann D, D'Souza M *et al.* (2008) The metagenomics RAST server - a public  
1780 resource for the automatic phylogenetic and functional analysis of metagenomes. *BMC*  
1781 *Bioinformatics*, **9**, 386.
- 1782 Micallef L, Rodgers P (2014) eulerAPE: drawing area-proportional 3-Venn diagrams using  
1783 ellipses. *PLoS ONE*, **9**, e101717.
- 1784 Michalakis Y, Veuille M (1996) Length variation of CAG/CAA trinucleotide repeats in  
1785 natural populations of *Drosophila melanogaster* and its relation to the recombination  
1786 rate. *Genetics*, **143**, 1713–1725.
- 1787 Moran PAP (1950) Notes on Continuous Stochastic Phenomena. *Biometrika*, **37**, 17.
- 1788 Navarro A, Faria R (2014) Pool and conquer: new tricks for (c)old problems. *Molecular*  
1789 *Ecology*, **23**, 1653–1655.
- 1790 Nei M (1987) *Molecular Evolutionary Genetics*. Columbia University Press.
- 1791 Nolte V, Pandey RV, Kofler R, Schlötterer C (2013) Genome-wide patterns of natural  
1792 variation reveal strong selective sweeps and ongoing genomic conflict in *Drosophila*  
1793 *mauritiana*. *Genome Research*, **23**, 99–110.

- 1794 Novembre J, Stephens M (2008) Interpreting principal component analyses of spatial  
1795 population genetic variation. *Nature Genetics*, **40**, 646–649.
- 1796 Nunes MDS, Neumeier H, Schlötterer C (2008) Contrasting patterns of natural variation in  
1797 global *Drosophila melanogaster* populations. *Molecular Ecology*, **17**, 4470–4479.
- 1798 Okonechnikov K, Conesa A, García-Alcalde F (2016) Qualimap 2: advanced multi-sample  
1799 quality control for high-throughput sequencing data. *Bioinformatics*, **32**, 292–294.
- 1800 Parsch J, Novozhilov S, Saminadin-Peter SS, Wong KM, Andolfatto P (2010) On the utility  
1801 of short intron sequences as a reference for the detection of positive and negative  
1802 selection in *Drosophila*. *Molecular Biology and Evolution*, **27**, 1226–1234.
- 1803 Peel MC, Finlayson BL, McMahon TA (2007) Updated world map of the Köppen-Geiger  
1804 climate classification. *Hydrology and Earth System Sciences*, **11**, 1633–1644.
- 1805 Petrov DA, Fiston-Lavier AS, Lipatov M, Lenkov K, González J (2011) Population  
1806 Genomics of Transposable Elements in *Drosophila melanogaster*. *Molecular Biology  
1807 and Evolution*, **28**, 1633–1644.
- 1808 Pimpinelli S, Bonaccorsi S, Fanti L, Gatti M (2010) Preparation and Orcein Staining of  
1809 Mitotic Chromosomes from *Drosophila* Larval Brain. *Cold Spring Harbor Protocols*,  
1810 **2010**, pdb.prot5389–pdb.prot5389.
- 1811 Pool JE (2015) The Mosaic Ancestry of the *Drosophila* Genetic Reference Panel and the  
1812 *D. melanogaster* Reference Genome Reveals a Network of Epistatic Fitness  
1813 Interactions. *Molecular Biology and Evolution*, **32**, 3236–3251.
- 1814 Pool JE, Braun DT, Lack JB (2016) Parallel Evolution of Cold Tolerance Within *Drosophila  
1815 melanogaster*. *Molecular Biology and Evolution*, msw232.
- 1816 Pool JE, Corbett-Detig RB, Sugino RP *et al.* (2012) Population Genomics of Sub-Saharan  
1817 *Drosophila melanogaster*: African Diversity and Non-African Admixture. *PLoS  
1818 Genetics*, **8**, e1003080.

- 1819 Powell JR (1997) *Progress and Prospects in Evolutionary Biology: The Drosophila Model*.  
1820 Oxford University Press.
- 1821 R Development Core Team (2009) R: A Language and Environment for Statistical  
1822 Computing. *R-project.org*.
- 1823 Rako L, Anderson AR, Sgrò CM, Stocker AJ, Hoffmann AA (2006) The association  
1824 between inversion *In(3R)Payne* and clinally varying traits in *Drosophila melanogaster*.  
1825 *Genetica*, **128**, 373–384.
- 1826 Ramachandran S, Rosenberg NA, Zhivotovsky LA, Feldman MW (2004) Robustness of  
1827 the inference of human population structure: a comparison of X-chromosomal and  
1828 autosomal microsatellites. *Human genomics*, **1**, 87–97.
- 1829 Rane RV, Rako L, Kapun M, LEE SF (2015) Genomic evidence for role of inversion *3RP*  
1830 of *Drosophila melanogaster* in facilitating climate change adaptation. *Molecular*  
1831 *Ecology*, **24**, 2423–2432.
- 1832 Richardson JL, Urban MC, Bolnick DI, Skelly DK (2014) Microgeographic adaptation and  
1833 the spatial scale of evolution. *Trends in Ecology & Evolution*, **29**, 165–176.
- 1834 Richardson MF, Weinert LA, Welch JJ *et al.* (2012) Population Genomics of the *Wolbachia*  
1835 Endosymbiont in *Drosophila melanogaster* (A Kopp, Ed.). *PLoS Genetics*, **8**,  
1836 e1003129.
- 1837 Roberts DB (Ed.) (1998) *Drosophila: A Practical Approach The Practical Approach*.  
1838 Practical Approach Series.
- 1839 Rogers RL, Hartl DL (2012) Chimeric genes as a source of rapid evolution in *Drosophila*  
1840 *melanogaster*. *Molecular Biology and Evolution*, **29**, 517–529.
- 1841 Rozas J, Ferrer-Mata A, Sánchez-DelBarrio JC *et al.* (2017) DnaSP 6: DNA Sequence  
1842 Polymorphism Analysis of Large Datasets. *Molecular Biology and Evolution*, **34**, 3299–  
1843 3302.



- 1844 Salmela L, Schröder J (2011) Correcting errors in short reads by multiple alignments.  
1845 *Bioinformatics*, **27**, 1455–1461.
- 1846 Schlenke TA, Begun DJ (2003) Natural selection drives *Drosophila* immune system  
1847 evolution., **164**, 1471–1480.
- 1848 Schlötterer C, Neumeier H, Sousa C, Nolte V (2006) Highly structured Asian *Drosophila*  
1849 *melanogaster* populations: a new tool for hitchhiking mapping? *Genetics*, **172**, 287–  
1850 292.
- 1851 Schlötterer C, Tobler R, Kofler R, Nolte V (2014) Sequencing pools of individuals - mining  
1852 genome-wide polymorphism data without big funding. *Nature Reviews Genetics*, **15**,  
1853 749–763.
- 1854 Schmidt JM, Good RT, Appleton B *et al.* (2010) Copy number variation and transposable  
1855 elements feature in recent, ongoing adaptation at the *Cyp6g1* locus. *PLoS Genetics*, **6**,  
1856 e1000998.
- 1857 Schmidt PS, Paaby AB (2008) Reproductive Diapause and Life-History Clines in North  
1858 American Populations of *Drosophila melanogaster*. *Evolution*, **62**, 1204–1215.
- 1859 Schmidt PS, Zhu CT, Das J *et al.* (2008) An amino acid polymorphism in the *couch potato*  
1860 gene forms the basis for climatic adaptation in *Drosophila melanogaster*. *Proceedings*  
1861 *of the National Academy of Sciences of the United States of America*, **105**, 16207–  
1862 16211.
- 1863 Sella G, Petrov DA, Przeworski M, Andolfatto P (2009) Pervasive Natural Selection in the  
1864 *Drosophila* Genome? *PLoS Genetics*, **5**, e1000495.
- 1865 Sezgin E, Duvernell DD, Matzkin LM *et al.* (2004) Single-locus latitudinal clines and their  
1866 relationship to temperate adaptation in metabolic genes and derived alleles in  
1867 *Drosophila melanogaster*. *Genetics*, **168**, 923–931.

- 1868 Singh AK (2018) Chromosomal variability due to inversions in indian populations of  
1869 *Drosophila*. *Indian J Sci Res*.
- 1870 Singh BN, Das A (1992) Further evidence for latitudinal inversion clines in natural  
1871 populations of *Drosophila melanogaster* from India. *Journal of Heredity*, **83**, 227–230.
- 1872 Singh ND, Arndt PF, Clark AG, Aquadro CF (2009) Strong evidence for lineage and  
1873 sequence specificity of substitution rates and patterns in *Drosophila*. *Molecular Biology*  
1874 *and Evolution*, **26**, 1591–1605.
- 1875 Stalker HD (1976) Chromosome studies in wild populations of *D. melanogaster*. *Genetics*,  
1876 **82**, 323–347.
- 1877 Stalker HD (1980) Chromosome Studies in Wild Populations of *Drosophila melanogaster*.  
1878 II. Relationship of Inversion Frequencies to Latitude, Season, Wing-Loading and Flight  
1879 Activity. *Genetics*, **95**, 211–223.
- 1880 Staubach F, Baines JF, Künzel S, Bik EM, Petrov DA (2013) Host species and  
1881 environmental effects on bacterial communities associated with *Drosophila* in the  
1882 laboratory and in the natural environment. *PLoS ONE*, **8**, e70749.
- 1883 Stephan W (2010) Genetic hitchhiking versus background selection: the controversy and  
1884 its implications. *Philosophical Transactions Of The Royal Society Of London Series B-*  
1885 *Biological Sciences*, **365**, 1245–1253.
- 1886 Svetec N, Pavlidis P, Stephan W (2009) Recent strong positive selection on *Drosophila*  
1887 *melanogaster* *HDAC6*, a gene encoding a stress surveillance factor, as revealed by  
1888 population genomic analysis. *Molecular Biology and Evolution*, **26**, 1549–1556.
- 1889 Tajima F (1989) Statistical method for testing the neutral mutation hypothesis by DNA  
1890 polymorphism. *Genetics*, **123**, 585–595.
- 1891 Trinder M, Daisley BA, Dube JS, Reid G (2017) *Drosophila melanogaster* as a High-  
1892 Throughput Model for Host-Microbiota Interactions. *Frontiers in microbiology*, **8**, 751.

- 1893 Turner TL, Levine MT, Eckert ML, Begun DJ (2008) Genomic analysis of adaptive  
1894 differentiation in *Drosophila melanogaster*. *Genetics*, **179**, 455–473.
- 1895 Umina PA, Weeks AR, Kearney MR, McKechnie SW, Hoffmann AA (2005) A rapid shift in  
1896 a classic clinal pattern in *Drosophila* reflecting climate change. *Science*, **308**, 691–693.
- 1897 Unckless RL (2011) A DNA virus of *Drosophila*. *PLoS ONE*, **6**, e26564.
- 1898 Van 't Land J, Van Putten WF, Villarroel H, Kamping A, van Delden W (2000) Latitudinal  
1899 variation for two enzyme loci and an inversion polymorphism in *Drosophila*  
1900 *melanogaster* from Central and South America. *Evolution*, **54**, 201–209.
- 1901 Voelker RA, Cockerham CC, Johnson FM *et al.* (1978) INVERSIONS FAIL TO ACCOUNT  
1902 FOR ALLOZYME CLINES. *Genetics*, **88**, 515–527.
- 1903 Watterson GA (1975) On the number of segregating sites in genetical models without  
1904 recombination. *Theoretical Population Biology*, **7**, 256–276.
- 1905 Webster CL, Longdon B, Lewis SH, Obbard DJ (2016) Twenty-Five New Viruses  
1906 Associated with the Drosophilidae (Diptera). *Evolutionary bioinformatics online*, **12**,  
1907 13–25.
- 1908 Webster CL, Waldron FM, Robertson S *et al.* (2015) The Discovery, Distribution, and  
1909 Evolution of Viruses Associated with *Drosophila melanogaster*. *PLoS Biology*, **13**,  
1910 e1002210.
- 1911 Weir BS, Cockerham CC (1984) Estimating *F*-Statistics for the Analysis of Population  
1912 Structure. *Evolution*, **38**, 1358–1370.
- 1913 Werren JH, Baldo L, Clark ME (2008) Wolbachia: master manipulators of invertebrate  
1914 biology. *Nature Reviews Microbiology*, **6**, 741–751.
- 1915 Wesley CS, Eanes WF (1994) Isolation and analysis of the breakpoint sequences of  
1916 chromosome inversion *In(3L)Payne* in *Drosophila melanogaster*. *Proceedings of the*  
1917 *National Academy of Sciences of the United States of America*, **91**, 3132–3136.

- 1918 Wickham H (2016) *ggplot2: Elegant Graphics for Data Analysis*. Springer.
- 1919 Wilfert L, Longdon B, Ferreira AGA, Bayer F, Jiggins FM (2011) Trypanosomatids are  
1920 common and diverse parasites of *Drosophila*. *Parasitology*, **138**, 858–865.
- 1921 Wittmann MJ, Bergland AO, Feldman MW, Schmidt PS, Petrov DA (2017) Seasonally  
1922 fluctuating selection can maintain polymorphism at many loci via segregation lift.  
1923 *Proceedings of the National Academy of Sciences of the United States of America*,  
1924 **114**, E9932–E9941.
- 1925 Wolf JBW, Bayer T, Haubold B *et al.* (2010) Nucleotide divergence vs. gene expression  
1926 differentiation: comparative transcriptome sequencing in natural isolates from the  
1927 carrion crow and its hybrid zone with the hooded crow. *Molecular Ecology*, **19**, 162–  
1928 175.
- 1929 Wolff JN, Camus MF, Clancy DJ, Dowling DK (2016) Complete mitochondrial genome  
1930 sequences of thirteen globally sourced strains of fruit fly (*Drosophila melanogaster*)  
1931 form a powerful model for mitochondrial research. *Mitochondrial DNA. Part A, DNA*  
1932 *mapping, sequencing, and analysis*, **27**, 4672–4674.
- 1933 Xiao F-X, Yotova V, Zietkiewicz E *et al.* (2004) Human X-chromosomal lineages in Europe  
1934 reveal Middle Eastern and Asiatic contacts. *European Journal of Human Genetics*, **12**,  
1935 301–311.
- 1936 Yukilevich R, True JR (2008a) Incipient sexual isolation among cosmopolitan *Drosophila*  
1937 *melanogaster* populations. *Evolution*, **62**, 2112–2121.
- 1938 Yukilevich R, True JR (2008b) African morphology, behavior and pheromones underlie  
1939 incipient sexual isolation between us and Caribbean *Drosophila melanogaster*.  
1940 *Evolution*, **62**, 2807–2828.

- 1941 Yukilevich R, Turner TL, Aoki F, Nuzhdin SV, True JR (2010) Patterns and processes of  
1942 genome-wide divergence between North American and African *Drosophila*  
1943 *melanogaster*. *Genetics*, **186**, 219–239.
- 1944 Zanini F, Brodin J, Thebo L *et al.* (2015) Population genomics of inpatient HIV-1  
1945 evolution. (AK Chakraborty, Ed.). *eLife*, **4**, e11282.
- 1946

1947 **Tables**

1948

1949 **Table 1. Sample information for all populations in the *DrosEU* dataset.** The table shows the origin, collection data and season and  
1950 sample size (number of chromosomes: *n*) of the 48 samples in the *DrosEU* dataset. Additional information can be found in the supporting  
1951 information in Table S1.

| ID           | Country        | Location          | Coll. Date | Number ID | Lat (°) | Lon (°) | Alt (m) | Season | n  | Coll. name                 |
|--------------|----------------|-------------------|------------|-----------|---------|---------|---------|--------|----|----------------------------|
| AT_Mau_14_01 | Austria        | Mauternbach       | 2014-07-20 | 1         | 48.38   | 15.56   | 572     | S      | 80 | Andrea J. Betancourt       |
| AT_Mau_14_02 | Austria        | Mauternbach       | 2014-10-19 | 2         | 48.38   | 15.56   | 572     | F      | 80 | Andrea J. Betancourt       |
| TR_Yes_14_03 | Turkey         | Yesiloz           | 2014-08-31 | 3         | 40.23   | 32.26   | 680     | S      | 80 | Banu Sebnem Onder          |
| TR_Yes_14_04 | Turkey         | Yesiloz           | 2014-10-23 | 4         | 40.23   | 32.26   | 680     | F      | 80 | Banu Sebnem Onder          |
| FR_Vil_14_05 | France         | Viltain           | 2014-08-18 | 5         | 48.75   | 2.16    | 153     | S      | 80 | Catherine Montchamp-Moreau |
| FR_Vil_14_07 | France         | Viltain           | 2014-10-27 | 7         | 48.75   | 2.16    | 153     | F      | 80 | Catherine Montchamp-Moreau |
| FR_Got_14_08 | France         | Gotheron          | 2014-07-08 | 8         | 44.98   | 4.93    | 181     | S      | 80 | Cristina Vieira            |
| UK_She_14_09 | United Kingdom | Sheffield         | 2014-08-25 | 9         | 53.39   | -1.52   | 100     | S      | 80 | Damiano Porcelli           |
| UK_Sou_14_10 | United Kingdom | South Queensferry | 2014-07-14 | 10        | 55.97   | -3.35   | 19      | S      | 80 | Darren Obbard              |
| CY_Nic_14_11 | Cyprus         | Nicosia           | 2014-08-10 | 11        | 35.07   | 33.32   | 263     | S      | 80 | Eliza Argyridou            |
| UK_Mar_14_12 | United Kingdom | Market Harborough | 2014-10-20 | 12        | 52.48   | -0.92   | 80      | F      | 80 | Eran Tauber                |
| UK_Lut_14_13 | United Kingdom | Lutterworth       | 2014-10-20 | 13        | 52.43   | -1.10   | 126     | F      | 80 | Eran Tauber                |

|              |          |                 |            |    |       |       |     |   |    |                      |
|--------------|----------|-----------------|------------|----|-------|-------|-----|---|----|----------------------|
| DE_Bro_14_14 | Germany  | Broggingen      | 2014-06-26 | 14 | 48.22 | 7.82  | 173 | S | 80 | Fabian Staubach      |
| DE_Bro_14_15 | Germany  | Broggingen      | 2014-10-15 | 15 | 48.22 | 7.82  | 173 | F | 80 | Fabian Staubach      |
| UA_Yal_14_16 | Ukraine  | Yalta           | 2014-06-20 | 16 | 44.50 | 34.17 | 72  | S | 80 | Iryna Kozeretska     |
| UA_Yal_14_18 | Ukraine  | Yalta           | 2014-08-27 | 18 | 44.50 | 34.17 | 72  | S | 80 | Iryna Kozeretska     |
| UA_Ode_14_19 | Ukraine  | Odesa           | 2014-07-03 | 19 | 46.44 | 30.77 | 54  | S | 80 | Iryna Kozeretska     |
| UA_Ode_14_20 | Ukraine  | Odesa           | 2014-07-22 | 20 | 46.44 | 30.77 | 54  | S | 80 | Iryna Kozeretska     |
| UA_Ode_14_21 | Ukraine  | Odesa           | 2014-08-29 | 21 | 46.44 | 30.77 | 54  | S | 80 | Iryna Kozeretska     |
| UA_Ode_14_22 | Ukraine  | Odesa           | 2014-10-10 | 22 | 46.44 | 30.77 | 54  | F | 80 | Iryna Kozeretska     |
| UA_Kyi_14_23 | Ukraine  | Kyiv            | 2014-08-09 | 23 | 50.34 | 30.49 | 179 | S | 80 | Iryna Kozeretska     |
| UA_Kyi_14_24 | Ukraine  | Kyiv            | 2014-09-08 | 24 | 50.34 | 30.49 | 179 | F | 80 | Iryna Kozeretska     |
| UA_Var_14_25 | Ukraine  | Varva           | 2014-08-18 | 25 | 50.48 | 32.71 | 125 | S | 80 | Oleksandra Protsenko |
| UA_Pyr_14_26 | Ukraine  | Pyriatyn        | 2014-08-20 | 26 | 50.25 | 32.52 | 114 | S | 80 | Oleksandra Protsenko |
| UA_Dro_14_27 | Ukraine  | Drogobych       | 2014-08-24 | 27 | 49.33 | 23.50 | 275 | S | 80 | Iryna Kozeretska     |
| UA_Cho_14_28 | Ukraine  | Chornobyl       | 2014-09-13 | 28 | 51.37 | 30.14 | 121 | F | 80 | Iryna Kozeretska     |
| UA_Cho_14_29 | Ukraine  | Chornobyl Yaniv | 2014-09-13 | 29 | 51.39 | 30.07 | 121 | F | 80 | Iryna Kozeretska     |
| SE_Lun_14_30 | Sweden   | Lund            | 2014-07-31 | 30 | 55.69 | 13.20 | 51  | S | 80 | Jessica Abbott       |
| DE_Mun_14_31 | Germany  | Munich          | 2014-06-19 | 31 | 48.18 | 11.61 | 520 | S | 80 | John Parsch          |
| DE_Mun_14_32 | Germany  | Munich          | 2014-09-03 | 32 | 48.18 | 11.61 | 520 | F | 80 | John Parsch          |
| PT_Rec_14_33 | Portugal | Recarei         | 2014-09-26 | 33 | 41.15 | -8.41 | 175 | F | 80 | Jorge Vieira         |

|              |             |                       |            |    |       |       |     |   |    |                     |
|--------------|-------------|-----------------------|------------|----|-------|-------|-----|---|----|---------------------|
| ES_Gim_14_34 | Spain       | Gimenells (Lleida)    | 2014-10-20 | 34 | 41.62 | 0.62  | 173 | F | 80 | Lain Guio           |
| ES_Gim_14_35 | Spain       | Gimenells (Lleida)    | 2014-08-13 | 35 | 41.62 | 0.62  | 173 | S | 80 | Lain Guio           |
| FI_Aka_14_36 | Finland     | Akaa                  | 2014-07-25 | 36 | 61.10 | 23.52 | 88  | S | 80 | Maaria Kankare      |
| FI_Aka_14_37 | Finland     | Akaa                  | 2014-08-27 | 37 | 61.10 | 23.52 | 88  | S | 80 | Maaria Kankare      |
| FI_Ves_14_38 | Finland     | Vesanto               | 2014-07-26 | 38 | 62.55 | 26.24 | 121 | S | 66 | Maaria Kankare      |
| DK_Kar_14_39 | Denmark     | Karensminde           | 2014-09-01 | 39 | 55.95 | 10.21 | 15  | F | 80 | Mads Fristrup Schou |
| DK_Kar_14_41 | Denmark     | Karensminde           | 2014-11-25 | 41 | 55.95 | 10.21 | 15  | F | 80 | Mads Fristrup Schou |
| CH_Cha_14_42 | Switzerland | Chalet à Gobet        | 2014-07-24 | 42 | 46.57 | 6.70  | 872 | S | 80 | Martin Kapun        |
| CH_Cha_14_43 | Switzerland | Chalet à Gobet        | 2014-10-05 | 43 | 46.57 | 6.70  | 872 | F | 80 | Martin Kapun        |
| AT_See_14_44 | Austria     | Seeboden              | 2014-08-17 | 44 | 46.81 | 13.51 | 591 | S | 80 | Martin Kapun        |
| UA_Kha_14_45 | Ukraine     | Kharkiv               | 2014-07-26 | 45 | 49.82 | 36.05 | 141 | S | 80 | Svitlana Serga      |
| UA_Kha_14_46 | Ukraine     | Kharkiv               | 2014-09-14 | 46 | 49.82 | 36.05 | 141 | F | 80 | Svitlana Serga      |
| UA_Cho_14_47 | Ukraine     | Chornobyl Applegarden | 2014-09-13 | 47 | 51.27 | 30.22 | 121 | F | 80 | Svitlana Serga      |
| UA_Cho_14_48 | Ukraine     | Chornobyl Polisske    | 2014-09-13 | 48 | 51.28 | 29.39 | 121 | F | 70 | Svitlana Serga      |
| UA_Kyi_14_49 | Ukraine     | Kyiv                  | 2014-10-11 | 49 | 50.34 | 30.49 | 179 | F | 80 | Svitlana Serga      |
| UA_Uma_14_50 | Ukraine     | Uman                  | 2014-10-01 | 50 | 48.75 | 30.21 | 214 | F | 80 | Svitlana Serga      |
| RU_Val_14_51 | Russia      | Valday                | 2014-08-17 | 51 | 57.98 | 33.24 | 217 | S | 80 | Elena Pasyukova     |

1952

1953



1954 **Table 2. Clinality of genetic variation and population structure.** Effects of geographic variables and/or seasonality on genome-wide  
1955 average levels of diversity ( $\pi$ ,  $\theta$  and Tajima's  $D$ ; top rows) and on the first three axes of a PCA based on allele frequencies at neutrally  
1956 evolving sites (bottom rows). The values represent  $F$ -ratios from general linear models. Bold type indicates  $F$ -ratios that are significant  
1957 after Bonferroni correction (adjusted  $\alpha=0.0055$ ). Asterisks in parentheses indicate significance when accounting for spatial  
1958 autocorrelation by spatial error models. These models were only calculated when Moran's  $I$  test, as shown in the last column, was  
1959 significant. \* $p < 0.05$ ; \*\* $p < 0.01$ ; \*\*\* $p < 0.001$ .

1960

| <b>Factor</b>    | <b>Latitude</b> | <b>Longitude</b>      | <b>Altitude</b> | <b>Season</b> | <b>Moran's I</b> |
|------------------|-----------------|-----------------------|-----------------|---------------|------------------|
| $\pi_{(X)}$      | 4.11*           | 1.62                  | <b>15.23***</b> | 1.65          | 0.86             |
| $\pi_{(Aut)}$    | 0.91            | 2.54                  | <b>27.18***</b> | 0.16          | -0.86            |
| $\theta_{(X)}$   | 2.65            | 1.31                  | <b>15.54***</b> | 2.22          | 0.24             |
| $\theta_{(Aut)}$ | 0.48            | 1.44                  | <b>13.66***</b> | 0.37          | -1.13            |
| $D_{(X)}$        | 0.02            | 0.38                  | 5.93*           | 3.26          | -2.08            |
| $D_{(Aut)}$      | 0.09            | 0.76                  | 5.33*           | 0.71          | -1.45            |
| PC1              | 0.06            | <b>120.72***(***)</b> | 5.35*(*)        | 2.53          | 4.15***          |
| PC2              | 3.5             | <b>10.22**</b>        | <b>15.21***</b> | 1.97          | -1.96            |

|      |       |      |      |      |      |      |
|------|-------|------|------|------|------|------|
|      | PC3   | 0.14 | 0.11 | 0.01 | 1.29 | 0.22 |
| 1961 | <hr/> |      |      |      |      |      |
| 1962 |       |      |      |      |      |      |

1963 **Table 3. Clinality and/or seasonality of chromosomal inversions.** The values represent *F*-ratios from generalized linear models with  
 1964 a binomial error structure to account for frequency data. Bold type indicates deviance values that were significant after Bonferroni  
 1965 correction (adjusted  $\alpha=0.0071$ ). Stars in parentheses indicate significance when accounting for spatial autocorrelation by spatial error  
 1966 models. These models were only calculated when Moran's *I* test, as shown in the last column, was significant. \* $p < 0.05$ ; \*\* $p < 0.01$ ; \*\*\* $p$   
 1967  $< 0.001$

1968

| <i>Factor</i>      | <i>Latitude</i>     | <i>Longitude</i> | <i>Altitude</i> | <i>Season</i> | <i>Moran's I</i> |
|--------------------|---------------------|------------------|-----------------|---------------|------------------|
| <i>In(2L)t</i>     | 2.2                 | <b>10.09**</b>   | <b>43.94***</b> | 0.89          | -0.92            |
| <i>In(2R)NS</i>    | 0.25                | <b>14.43***</b>  | 2.88            | 2.43          | 1.25             |
| <i>In(3L)P</i>     | <b>21.78***</b>     | 2.82             | 0.62            | 3.6           | -1.61            |
| <i>In(3R)C</i>     | <b>18.5***(***)</b> | 0.75             | 1.42            | 0.04          | 2.79**           |
| <i>In(3R)Mo</i>    | 0.3                 | 0.09             | 0.35            | 0.03          | -0.9             |
| <i>In(3R)Payne</i> | <b>43.47***</b>     | 0.66             | 1.69            | 1.55          | -0.89            |

1969

1970
