1 **Genomic analysis of European *Drosophila melanogaster* populations on**  
2 **a dense spatial scale reveals longitudinal population structure and**  
3 **continent-wide selection**

4

5 Martin Kapun<sup>1,2,3,\*</sup>, Maite G. Barrón<sup>1,4,\*</sup>, Fabian Staubach<sup>1,5,§</sup>, Jorge Vieira<sup>1,6,7</sup>, Darren J.  
6 Obbard<sup>1,8</sup>, Clément Goubert<sup>1,9,10</sup>, Omar Rota-Stabelli<sup>1,11</sup>, Maaria Kankare<sup>1,12,§</sup>, Annabelle  
7 Haudry<sup>1,9</sup>, R. Axel W. Wiberg<sup>1,13,14</sup>, Lena Waidele<sup>1,5</sup>, Iryna Kozeretska<sup>1,15</sup>, Elena G.  
8 Pasyukova<sup>1,16</sup>, Volker Loeschcke<sup>1,17</sup>, Marta Pascual<sup>1,18</sup>, Cristina P. Vieira<sup>1,6,7</sup>, Svitlana  
9 Serga<sup>1,15</sup>, Catherine Montchamp-Moreau<sup>1,19</sup>, Jessica Abbott<sup>1,20</sup>, Patricia Gibert<sup>1,9</sup>, Damiano  
10 Porcelli<sup>1,21</sup>, Nico Posnien<sup>1,22</sup>, Sonja Grath<sup>1,23</sup>, Élio Sucena<sup>1,24,25</sup>, Alan O. Bergland<sup>1,26,§</sup>,  
11 Maria Pilar Garcia Guerreiro<sup>1,27</sup>, Banu Sebnem Onder<sup>1,28</sup>, Eliza Argyridou<sup>1,23</sup>, Lain Guio<sup>1,4</sup>,  
12 Mads Fristrup Schou<sup>1,17</sup>, Bart Deplancke<sup>1,29</sup>, Cristina Vieira<sup>1,9</sup>, Michael G. Ritchie<sup>1,13</sup>, Bas  
13 J. Zwaan<sup>1,30</sup>, Eran Tauber<sup>1,31</sup>, Dorcas J. Orengo<sup>1,18</sup>, Eva Puerma<sup>1,18</sup>, Montserrat  
14 Aguadé<sup>1,18</sup>, Paul S. Schmidt<sup>1,32,§</sup>, John Parsch<sup>1,23</sup>, Andrea J. Betancourt<sup>1,33</sup>, Thomas  
15 Flatt<sup>1,2,3,†,§</sup>, Josefa González<sup>1,4,†,§</sup>

16

17 <sup>1</sup> The European *Drosophila* Population Genomics Consortium (*DrosEU*)

18 <sup>2</sup> Department of Ecology and Evolution, University of Lausanne, CH-1015 Lausanne,  
19 Switzerland

20 <sup>3</sup> Department of Biology, University of Fribourg, CH-1700 Fribourg, Switzerland

21 <sup>4</sup> Institute of Evolutionary Biology, CSIC-Universitat Pompeu Fabra, Barcelona, Spain

22 <sup>5</sup> Department of Evolutionary Biology and Ecology, University of Freiburg, 79104 Freiburg,  
23 German

24 <sup>6</sup> Instituto de Biologia Molecular e Celular (IBMC) University of Porto, Porto, Portugal

25 <sup>7</sup> Instituto de Investigação e Inovação em Saúde (I3S), University of Porto, Porto, Portugal

26 <sup>8</sup> Institute of Evolutionary Biology, University of Edinburgh, Edinburgh, United Kingdom

27 <sup>9</sup> Laboratoire de Biométrie et Biologie Evolutive, UMR CNRS 5558, University Lyon 1,  
28 Lyon, France

29 <sup>10</sup> Department of Molecular Biology and Genetics, 107 Biotechnology Building, Cornell  
30 University, Ithaca, New York 14853, USA

31 <sup>11</sup> Research and Innovation Centre, Fondazione Edmund Mach, San Michele all' Adige,  
32 Italy

33 <sup>12</sup> Department of Biological and Environmental Science, University of Jyväskylä,  
34 Jyväskylä, Finland

35 <sup>13</sup> Centre for Biological Diversity, School of Biology, University of St. Andrews, St Andrews,  
36 United Kingdom

37 <sup>14</sup> Evolutionary Biology, Zoological Institute, University of Basel, Basel, CH-4051,  
38 Switzerland

39 <sup>15</sup> General and Medical Genetics Department, Taras Shevchenko National University of  
40 Kyiv, Kyiv, Ukraine

41 <sup>16</sup> Laboratory of Genome Variation, Institute of Molecular Genetics of RAS, Moscow,  
42 Russia

43 <sup>17</sup> Department of Bioscience - Genetics, Ecology and Evolution, Aarhus University, Aarhus  
44 C, Denmark

45 <sup>18</sup> Departament de Genètica, Microbiologia i Estadística, Facultat de Biologia and Institut  
46 de Recerca de la Biodiversitat (IRBio), Universitat de Barcelona, Barcelona, Spain

47 <sup>19</sup> Laboratoire Evolution, Génomes, Comportement et Ecologie (EGCE) UMR 9191 CNRS  
48 - UMR247 IRD - Université Paris Sud - Université Paris Saclay. 91198 Gif sur Yvette  
49 Cedex, France.

50 <sup>20</sup> Department of Biology, Section for Evolutionary Ecology, Lund, Sweden

- 51 <sup>21</sup> Department of Animal and Plant Sciences, Sheffield, United Kingdom
- 52 <sup>22</sup>Universität Göttingen, Johann-Friedrich-Blumenbach-Institut für Zoologie und  
53 Anthropologie, Göttingen, Germany
- 54 <sup>23</sup> Division of Evolutionary Biology, Faculty of Biology, Ludwig-Maximilians-Universität  
55 München, Planegg, Germany
- 56 <sup>24</sup> Instituto Gulbenkian de Ciência, Oeiras, Portugal
- 57 <sup>25</sup>Departamento de Biologia Animal, Faculdade de Ciências da Universidade de Lisboa,  
58 Lisboa, Portugal
- 59 <sup>26</sup> Department of Biology, University of Virginia, Charlottesville, VA, USA
- 60 <sup>27</sup> Departament de Genètica i Microbiologia, Universitat Autònoma de Barcelona,  
61 Barcelona, Spain
- 62 <sup>28</sup> Department of Biology, Faculty of Science, Hacettepe University, Ankara, Turkey
- 63 <sup>29</sup> Laboratory of Systems Biology and Genetics, EPFL-SV-IBI-UPDEPLA, CH-1015  
64 Lausanne, Switzerland
- 65 <sup>30</sup> Laboratory of Genetics, Department of Plant Sciences, Wageningen University,  
66 Wageningen, Netherlands
- 67 <sup>31</sup> Department of Evolutionary and Environmental Biology and Institute of Evolution,  
68 University of Haifa, Haifa, Israel
- 69 <sup>32</sup> Department of Biology, University of Pennsylvania, Philadelphia, USA
- 70 <sup>33</sup> Institute of Integrative Biology, University of Liverpool, Liverpool, United Kingdom
- 71
- 72 † **For correspondence:** [thomas.flatt@unifr.ch](mailto:thomas.flatt@unifr.ch), [josefa.gonzalez@ibe.upf-csic.es](mailto:josefa.gonzalez@ibe.upf-csic.es)

73

74 \* These authors contributed equally to this work

75

76 § Members of the *Drosophila* Real Time Evolution (Dros-RTEC) Consortium

77

78 **Competing interests:** The authors declare that no competing interests exist.

79

## 80 **Abstract**

81 Genetic variation is the fuel of evolution. However, analyzing dynamics of evolutionary  
82 change in natural populations is challenging, genome sequencing of entire populations  
83 remains costly and comprehensive sample collection logistically challenging. To tackle this  
84 issue and to define relevant spatial and temporal scales of variation for a population  
85 genetic model system, the fruit fly *Drosophila melanogaster*, we have founded the  
86 European *Drosophila* Population Genomics Consortium (*DrosEU*). Our principal objective  
87 is to employ the strengths of this collaborative consortium to extensively sample and  
88 sequence natural populations on a continent-wide scale and across distinct timescales.  
89 Here we present the first analysis of the first *DrosEU* pool-sequencing dataset, consisting  
90 of 48 population samples collected across the European continent in 2014. The analysis of  
91 this comprehensive dataset uncovers novel patterns of variation at multiple levels:  
92 genome-wide neutral SNPs, mtDNA haplotypes, inversions and TEs that exhibit previously  
93 cryptic longitudinal population structure across the European continent; signatures of  
94 selective sweeps shared among the majority of European populations; presumably  
95 adaptive clines in inversions; and geographic variation in TEs. Additionally, we document  
96 highly variable microbiota among European fruit fly populations and identify several new  
97 *Drosophila* viruses. Our study reveals novel aspects of the population biology of *D.*  
98 *melanogaster* and illustrates the power of extensive sampling and pooled sequencing of  
99 natural populations on a continent-wide scale.

100

101 Keywords: *Drosophila*, population genomics, demography, selection, clines, SNPs,  
102 structural variants, symbionts.

103

## 104 **Introduction**

105 Genetic variation is the raw material for evolutionary change. Understanding the processes  
106 that create and maintain variation in natural populations remains a fundamental goal in  
107 evolutionary biology. The identification of patterns of genetic variation within and among  
108 taxa (Dobzhansky 1970; Lewontin 1974; Kreitman 1983; Kimura 1984; Hudson *et al.* 1987;  
109 McDonald & Kreitman 1991; e.g., Adrian & Comeron 2013) provides fundamental insights  
110 into the action of various evolutionary forces. Historically, due to technological constraints,  
111 studies of genetic variation were limited to single loci or small genomic regions and to  
112 static sampling of small numbers of individuals from natural populations. The development  
113 of population genomics has extended such analyses to patterns of variation on a genome-  
114 wide scale (e.g., Black *et al.* 2001; Jorde *et al.* 2001; Luikart *et al.* 2003; Begun *et al.* 2007;  
115 Sella *et al.* 2009; Charlesworth 2010; Casillas & Barbadilla 2017). This has resulted in  
116 fundamental advances in our understanding of historical and contemporaneous  
117 evolutionary dynamics in natural populations (e.g., Sella *et al.* 2009; Hohenlohe *et al.*  
118 2010; Cheng *et al.* 2012; Fabian *et al.* 2012; Pool *et al.* 2012; Messer & Petrov 2013;  
119 Ellegren 2014; Harpur *et al.* 2014; Kapun *et al.* 2014; Bergland *et al.* 2014; Charlesworth  
120 2015; Zanini *et al.* 2015; Kapun *et al.* 2016a; Casillas & Barbadilla 2017).

121

122 However, large-scale sampling and genome sequencing of entire populations remains  
123 largely prohibitive in terms of sequencing costs and labor-intensive sample collection,  
124 limiting the number of populations that can be analyzed. Evolution is a highly dynamic  
125 process across a variety of spatial scales in many taxa; thus, to generate a comprehensive

126 context for population genomic analyses, it is essential to define the appropriate spatial  
127 scales of analysis, from meters to thousands of kilometers (Levins 1968; Endler 1977;  
128 Richardson *et al.* 2014). Furthermore, one-time sampling of natural populations provides  
129 only a static view of patterns of genetic variation. Allele frequency changes can be highly  
130 dynamic even across very short timescales (e.g., Umina *et al.* 2005; Bergland *et al.* 2014;  
131 Behrman *et al.* 2018), and theoretical work suggests that such temporal dynamics may be  
132 an important yet largely understudied mechanism by which genetic variation is maintained  
133 (Wittmann *et al.* 2017). It is thus essential to define the relevant spatio-temporal scales for  
134 sampling and population genomic analyses accordingly.

135

136 To generate a population genomic framework that can deliver appropriate high-resolution  
137 sampling and to provide a unique resource to the research community, we formed the  
138 European *Drosophila* Population Genomics Consortium (*DrosEU*; <https://droseu.net>). Our  
139 primary objective is to utilize the strengths of this consortium to extensively sample and  
140 sequence European populations of *Drosophila melanogaster* on a continent-wide scale  
141 and across distinct timescales

142

143 *D. melanogaster* offers several advantages for such a concerted sampling and analysis  
144 effort: a relatively small genome, a broad geographic range, a multivoltine life history that  
145 allows sampling across generations over short timescales, ease of sampling natural  
146 populations using standardized techniques, an extensive research community and a well-  
147 developed context for population genomic analysis (Powell 1997; Keller 2007; Hales *et al.*  
148 2015). The species is native to sub-Saharan Africa and has subsequently expanded its  
149 range into novel habitats in Europe over the last 10,000-15,000 years and in North  
150 America and Australia in the last several hundred years (e.g., Lachaise *et al.* 1988; David

151 & Capy 1988; Keller 2007). On both the North American and Australian continents, the  
152 prevalence of latitudinal clines in frequencies of alleles (e.g., Schmidt & Paaby 2008;  
153 Turner *et al.* 2008; Kolaczkowski *et al.* 2011b; Fabian *et al.* 2012; Bergland *et al.* 2014;  
154 Machado *et al.* 2016; Kapun *et al.* 2016a), structural variants such as chromosomal  
155 inversions (Mettler *et al.* 1977; Voelker *et al.* 1978; Knibb *et al.* 1981; Knibb 1982; 1986;  
156 Anderson *et al.* 1991; Rako *et al.* 2006; Kapun *et al.* 2014; Rane *et al.* 2015; Kapun *et al.*  
157 2016a) and transposable elements (TEs) (Boussy *et al.* 1998; González *et al.* 2008; 2010),  
158 and complex phenotypes (de Jong & Bochdanovits 2003; Schmidt & Paaby 2008; Schmidt  
159 *et al.* 2008; Flatt *et al.* 2013; Adrion *et al.* 2015 and references therein; Kapun *et al.* 2016b;  
160 Behrman *et al.* 2018) have been interpreted to result from local adaptation to  
161 environmental factors that co-vary with latitude or as the legacy of an out-of-Africa  
162 dispersal history. However, sampling across these latitudinal gradients has not been  
163 replicated outside of a single transect on the east coasts of both continents. The observed  
164 latitudinal clines on the east coasts of North America and Australia may have been  
165 generated, at least in part, by demography and differential colonization histories of  
166 populations at high and low latitudes (Bergland *et al.* 2016). In North America, for example,  
167 temperate populations appear to be largely of European origin, whereas low latitude  
168 populations show evidence of greater admixture from ancestral African populations and  
169 the Caribbean (Caracristi & Schlötterer 2003; Yukilevich & True 2008a; b; Duchon *et al.*  
170 2013; Kao *et al.* 2015; Bergland *et al.* 2016). More intensive sampling and analysis of both  
171 African as well as European populations is essential to disentangling the relative  
172 importance of local adaptation versus colonization history and demography in generating  
173 the clinal patterns that have been widely observed. While there has been a great deal of  
174 progress in the analysis of ancestral African populations (e.g., Begun & Aquadro 1993;  
175 Corbett-Detig & Hartl 2012; Pool *et al.* 2012; Fabian *et al.* 2015; Lack *et al.* 2015; 2016),

176 Europe remains largely uncharacterized at the population genomic level (Božičević *et al.*  
177 2016; Pool *et al.* 2016; Mateo *et al.* 2018).

178

179 Here, we present the first analysis of the *DrosEU* pool-sequencing data from a set of 48  
180 European population samples collected in 2014. We examine the 2014 *DrosEU* data at  
181 three levels: (1) patterns of variation at  $\sim 5.5 \times 10^6$  single-nucleotide polymorphisms  
182 (SNPs) in the nuclear and mitochondrial (mtDNA) genomes; (2) variation in copy number  
183 of transposable elements (TEs); (3) cosmopolitan chromosomal inversions previously  
184 associated with climate adaptation; and (4) large amounts of variation among populations  
185 in microbiota, including endosymbionts, bacteria, and viruses. We find that European  
186 populations of *D. melanogaster* exhibit novel patterns of variation at all levels investigated:  
187 neutral SNPs in the nuclear genome and mtDNA haplotypes that reveal previously  
188 unknown longitudinal population structure; genomic regions consistent with selective  
189 sweeps that indicate selection on a continent-wide scale; new evidence for inversion clines  
190 in Europe; and spatio-temporal variation in TEs frequencies. We also identify four new  
191 DNA viruses and for the first time assemble the complete genome of a fifth. These novel  
192 features are revealed by the comprehensive magnitude of our coordinated sampling, thus  
193 demonstrating the utility of this approach.

194

195 Together with other genomic datasets for *D. melanogaster* ( e.g., DGRP, DPGP, DGN;  
196 reviewed in Casillas & Barbadilla 2017) our data provide a rich and powerful community  
197 resource for studies in molecular population genetics. Importantly, the *DrosEU* data  
198 represent the first comprehensive characterization of genetic variation in *D. melanogaster*  
199 on the European continent.

200



## 201 **Results**

202 As part of the *DrosEU* effort, we collected and sequenced 48 population samples of *D.*  
203 *melanogaster* from 32 geographical locations across Europe in 2014 (Table 1; Figure 2  
204 and Figure 3A). While our analyses focus on spatial patterns, thirteen of the 32 locations  
205 were sampled repeatedly (at least twice) during the year, allowing a first, crude analysis of  
206 seasonal changes in allele frequencies between summer and fall on a genome-wide level  
207 (Figure 2). All 48 samples were sequenced to high coverage, with a mean coverage per  
208 population of >50x (Table S1 and Figure S1). Using this high-quality dataset, we  
209 performed the first comprehensive, continent-wide population genomic analysis of  
210 European *D. melanogaster* (Figure 2). In addition to nuclear SNPs, we also analyzed  
211 mtDNA, TE insertions, chromosomal inversion polymorphisms, and the *Drosophila*-  
212 associated microbiome (Figure 3).

213

### 214 **Most SNPs are widespread throughout Europe**

215 We identified a total of 5,558,241 “high confidence” SNPs with frequencies > 0.1% across  
216 all 48 samples (Figure 3B, Table S1 and S2). Of these, 17% (941,080) were shared  
217 among all samples, whereas 62% were polymorphic in fewer than 50% of the samples  
218 (Figure 4A). Due to our filtering scheme, SNPs that are private or nearly private to a  
219 sample will be recovered only if they are at a substantial frequency in that sample (~5%).  
220 In fact, only a small proportion of SNPs (1% = 3,645) was found in fewer than 10% of the  
221 samples, and only 0.004% (210) were specific to a single sample (Figure 4A). To avoid an  
222 excess contribution of SNPs from populations with multiple (seasonal) sampling, we  
223 repeated the analysis by considering only the earliest (Figure S2A) or latest (Figure S2B)  
224 sample from populations with seasonal data. We observed very similar patterns across the  
225 three analyses: (i) a very small number of sample-specific, private SNPs (210, 527 and

226 455, respectively), (ii) a majority of SNPs shared among 20% to 40% of the samples (53%,  
227 52% and 52%, respectively), and (iii) a substantial proportion shared among all samples  
228 (17%, 20% and 19%, respectively; Figure 4A and Figure S2). These results suggest that  
229 most SNPs are geographically widespread in Europe and that genetic differentiation  
230 among populations is moderate, consistent with high levels of gene flow across the  
231 European continent.

232

233 **Derived European and North American populations share more SNPs with each**  
234 **other than they do with an ancestral African population**

235 *D. melanogaster* originated in sub-Saharan Africa, migrated to Europe ~10,000-15,000  
236 years ago, and subsequently colonized the rest of the world, including North America and  
237 Australia ~150 years ago (Lachaise *et al.* 1988; David & Capy 1988; Keller 2007). To  
238 search for genetic signatures of this shared history, we investigated the amount of allele  
239 sharing between African, European, and North American populations. We compared our  
240 SNP set to two published datasets, one from Zambia in sub-Saharan Africa (DPGP3; Lack  
241 *et al.* 2015) and one from North Carolina in North America (DGRP; Huang *et al.* 2014).  
242 Populations from Zambia inhabit the ancestral geographical range of *D. melanogaster*  
243 (Pool *et al.* 2012; Lack *et al.* 2015); North American populations are thought to be derived  
244 from European populations, with some degree of admixture from African populations,  
245 particularly in the southern United States and the Caribbean (Caracristi & Schlötterer  
246 2003; Yukilevich & True 2008a; b; Yukilevich *et al.* 2010; Duchon *et al.* 2013; Kao *et al.*  
247 2015; Pool 2015; Bergland *et al.* 2016). The population from North Carolina exhibits  
248 primarily European ancestry, with approximately 15% admixture from Africa (Bergland *et*  
249 *al.* 2016).

250

251 Approximately 10% of the SNPs (~1 million) were shared among all three datasets (Figure  
252 4B). Since the out-of-Africa range expansion and the subsequent colonization of the North  
253 America continent by European and - to a lesser degree - African ancestors was likely  
254 accompanied by founder effects, leading to a loss of African alleles, as well as adaptation  
255 to novel, temperate climates (de Jong & Bochdanovits 2003; Adrion *et al.* 2015) we  
256 predicted that a relatively high proportion of SNPs would be shared between Europe and  
257 North America. As expected, we found that the proportion of shared SNPs was higher  
258 between Europe and North America (22%) than between either Europe or North America  
259 and Zambia (11% and 13%, respectively; Figure 4B). When we analyzed SNPs in variant  
260 frequency bins, the proportion of SNPs shared across at least two continents increased  
261 from 26% to 41% for SNPs with variant frequencies larger than 50% (Figure S3A). In  
262 contrast, only 6% of the SNPs at low variant frequency (<10%; Figure S3C) were shared.  
263 These results are consistent with the loss of low-frequency variants during the colonization  
264 of new continents; they suggest that intermediate frequency alleles are more likely to be  
265 ancestral and thus shared across broad geographic scales. Interestingly, as compared to  
266 Africa and North America, we identified nearly 3 million private SNPs that are specific to  
267 Europe (Figure 4B). Given that North American and Australian populations are – at least  
268 partly – of European ancestry (e.g., Bergland *et al.* 2016), future analysis of our data may  
269 be able to shed light on the demography and adaptation of these derived populations.

270

### 271 **European and other derived populations exhibit similar amounts of genetic variation**

272 Next, we estimated genome-wide levels of nucleotide diversity within the European  
273 population samples using population genetic summary statistics. Pairwise nucleotide  
274 diversity ( $\pi$  and Watterson's  $\theta$ ), corrected for pooling (Futschik 2010; Kofler *et al.* 2011),  
275 ranged from 0.0047 to 0.0057 and from 0.0045 to 0.0064, respectively (Figure S4 and

276 Figure S5), with the estimates being qualitatively similar to those from non-African *D.*  
277 *melanogaster* populations sequenced as individuals (see Table S3 and Figure S6; Mackay  
278 *et al.* 2012; Langley *et al.* 2012; Huang *et al.* 2014; Grenier *et al.* 2015) or as pools  
279 (Kolaczkowski *et al.* 2011b; Fabian *et al.* 2012; Reinhardt *et al.* 2014). Estimates of  $\pi$  were  
280 slightly lower than, but in close agreement with, estimates of  $\theta$ , leading to a slightly  
281 negative average of Tajima's *D* (Tajima 1989). Due to our SNP calling approach (see  
282 Materials and Methods), we found a deficiency of alleles with frequencies  $\leq 0.01$ , both in  
283 the sample-wise site frequency spectra (SFS) and in the combined SFS by SNP type, with  
284 the sample-wise SFS being skewed towards low frequency variants (Figure S7A). In  
285 addition, we observed an excess of low-frequency SNPs at non-synonymous sites as  
286 compared to other types of site, which is consistent with purifying selection eliminating  
287 deleterious non-synonymous mutations (Figure 8B; Grenier *et al.* 2015).

288  
289 Overall, we observed only minor differences in the amount of genetic variation among  
290 populations. Specifically, genome-wide  $\pi$  ranged from 0.005 (Yalta, Ukraine) to 0.006  
291 (Chalet à Gobet, Switzerland) for autosomes, and from 0.003 (Odesa, Ukraine) to 0.0035  
292 (Chalet à Gobet, Switzerland) for the *X* chromosome (Table S1 and Figure S4). When  
293 testing for associations between geographic variables and genome-wide average levels of  
294 genetic variation, we found that both  $\pi$  and  $\theta$  were strongly negatively correlated with  
295 altitude, but neither was correlated with latitude or longitude (Table 2). No correlations  
296 were found between the season in which the samples were collected and levels of  
297 average genome-wide genetic variation as measured by  $\pi$  and  $\theta$  (Table 2).

298  
299 The *X* chromosome showed markedly lower genetic variation than the autosomes, with the  
300 ratio of *X*-linked to autosomal variation ( $\pi_X/\pi_A$ ) ranging from 0.53 to 0.66. These values

301 are well below the ratio of 0.75 (one-sample Wilcoxon rank test,  $p < 0.001$ ) that is  
302 expected under standard neutrality and equal sex ratios, but are consistent with previous  
303 findings for European populations of *D. melanogaster* and variously attributed to selection  
304 (e.g., Hutter *et al.* 2007), or changes in population size (Pool & Nielsen 2007). This pattern  
305 is consistent with previous estimates of relatively low X-linked diversity for European  
306 (Andolfatto 2001; Kauer *et al.* 2002; Hutter *et al.* 2007) and other non-African populations  
307 (also see Betancourt *et al.* 2004 and references therein; Mackay *et al.* 2012; Langley *et al.*  
308 2012). Interestingly, the  $\pi_X/\pi_A$  was significantly, albeit weakly, positively correlated with  
309 latitude (Spearman's  $r = 0.315$ ,  $p = 0.0289$ ), with northern populations having slightly  
310 higher X/A ratios than southern populations, contrary to our naive prediction of periodically  
311 bottlenecked populations leading to a lower X/A ratio in the north, perhaps reflecting more  
312 complex demographic scenarios (Hutter *et al.* 2007; Pool & Nielsen 2007).

313

314 In contrast to  $\pi$  and  $\theta$ , we observed major differences in the genome-wide averages of  
315 Tajima's  $D$  among samples (Figure S8). The chromosome-wide Tajima's  $D$  was negative  
316 in approximately half of all samples and close to zero or slightly positive in the remaining  
317 samples, possibly due to heterogeneity in the proportion of sequencing errors among the  
318 multiplexed sequencing runs. However, models that included sequence run as a covariate  
319 did not explain more of the observed variance than models without the covariate,  
320 suggesting that associations of  $\pi$  and  $\theta$  with geographic variables were not confounded by  
321 sequencing heterogeneity (see Supporting Information; Table S4). Moreover, our results  
322 for  $\pi$ ,  $\theta$  and  $D$  are unlikely to be confounded by spatio-temporal autocorrelations: after  
323 accounting for similarity among spatial neighbors (Moran's  $I \approx 0$ ,  $p > 0.05$  for all tests),  
324 there were no significant residual autocorrelations among samples for these estimators.

325

326 Genetic variation was not distributed homogeneously across the genome. Both  $\pi$  and  $\theta$   
327 were markedly reduced close to centromeric and telomeric regions (Figure 5), which is in  
328 good agreement with previous studies reporting systematic reductions in genetic variation  
329 in regions with reduced recombination (Begun & Aquadro 1992; Mackay *et al.* 2012;  
330 Langlely *et al.* 2012; Huang *et al.* 2014). Consistent with this, we detected strong  
331 correlations with estimates of recombination rates based on the data of Comeron *et al.*  
332 (2012; linear regression,  $p < 0.001$ ; not accounting for autocorrelation), suggesting that the  
333 distribution of genome-wide genetic variation is strongly influenced by the recombination  
334 landscape (Table S5). For autosomes, fine-scale recombination rates explained 41-47% of  
335 the variation in  $\pi$ , whereas broad-scale recombination rates (based on the recombination  
336 rate calculator of Fiston-Lavier *et al.* 2010) explained 50-56% of the variation in diversity.  
337 We obtained similar results for X-chromosomes, with recombination rates explaining 31-  
338 38% (based on Comeron *et al.* 2012) or 24-33% (based on Fiston-Lavier *et al.* 2010) of the  
339 variation (Figure 5, Table S5, Figure S9).

340

341 We also observed variation in Tajima's  $D$  with respect to genomic position (Figure 5).  
342 Notably, Tajima's  $D$  was markedly lower than the corresponding chromosome-wide  
343 average in the proximity of telomeric and centromeric regions on all chromosomal arms.  
344 These patterns possibly reflect purifying selection or selective sweeps close to  
345 heterochromatic regions (but see Betancourt *et al.* 2009), or might alternatively be a result  
346 of sequencing errors having a stronger effect on the SFS in low SNP density regions.

347

#### 348 **Localized reductions in Tajima's $D$ are consistent with selective sweeps**

349 We identified 144 genomic locations on the autosomes with non-zero recombination,  
350 reduced genetic variation, and a local reduction in Tajima's  $D$  (see Methods, Table S6),

351 which jointly may be indicative of selective sweeps. Although we cannot rule out that these  
352 patterns are the result of non-selective demographic effects (e.g., bottlenecks), two  
353 observations suggest that at least some of these regions are affected by positive selection.  
354 First, bottlenecks are typically expected to cause genome-wide, non-localized reductions  
355 in Tajima's  $D$ . Second, several of these genomic regions coincide with previously  
356 identified, well-supported selective sweeps in the proximity of *Hen1*, *Cyp6g1* (Figure 6A  
357 and Figure S10A; Daborn *et al.* 2002), *wapl* (Beisswanger *et al.* 2006), *HDAC6* (Svetec *et*  
358 *al.* 2009), or around the chimeric gene *CR18217* (Figure 6B, Figure S10B; Rogers & Hartl  
359 2012). Note, however, that some regions, such as those around *wapl* or *HDAC6*, are  
360 characterized by low recombination rates ( $< 0.5$  cM/Mb; Table S5), which can itself lead to  
361 reduced variation and Tajima's  $D$  (see also Nolte *et al.* 2013). Our screen also uncovered  
362 several regions that have not previously been described as harboring sweeps (Table S6).  
363 These represent promising candidate regions containing putative targets of positive  
364 selection. For several of these candidate sweep regions, patterns of variation were highly  
365 similar across the majority of European samples, suggesting continent-wide selective  
366 sweeps that either predate the colonization of Europe (e.g., Beisswanger *et al.* 2006) or  
367 that have swept across all European populations more recently. In contrast, some  
368 candidate sweep regions were restricted to only a few populations and characterized by  
369 highly negative values of Tajima's  $D$ , i.e. deviating from the among-population average by  
370 more than two standard deviations, thus possibly hinting at cases of local, population-  
371 specific adaptation (Figure S11 and Table S6 for examples).

372

### 373 **European populations are strongly structured along an east-west gradient**

374 We next investigated patterns of genetic differentiation due to demographic substructure.

375 Overall, pairwise differentiation as measured by  $F_{ST}$  was relatively low, though markedly

376 higher for *X*-chromosomes (0.043–0.076) than for autosomes (0.013–0.059; Student's *t*-  
377 test;  $p < 0.001$ ; Figure S12), possibly reflecting differences in effective population size  
378 between the *X* chromosome and the autosomes (Hutter *et al.* 2007). One population, from  
379 Sheffield, UK, showed an unusually high amount of differentiation on the *X*-chromosome  
380 as compared to other populations (Figure S12).

381

382 Despite these overall low levels of among-population differentiation, European populations  
383 showed some evidence of geographic substructure. To analyze this structure in more  
384 detail, we focused on a set of SNPs located in short introns (< 60 bp), as these sites are  
385 relatively unaffected by selection (Haddrill *et al.* 2005; Singh *et al.* 2009; Parsch *et al.*  
386 2010; Clemente & Vogl 2012; Lawrie *et al.* 2013). We analyzed the extent of isolation by  
387 distance (IBD) within Europe by correlating genetic and geographic distance and using  
388 pairwise  $F_{ST}$  between populations as a measure of genetic isolation.  $F_{ST}$  was overall low  
389 but significantly correlated with distance across the continent, indicating weak but  
390 significant IBD (Mantel test;  $p < 0.001$ ; max.  $F_{ST} \sim 0.05$ ; Figure 7A). We also investigated  
391 the populations that were most and least separated by genetic differentiation, estimated by  
392 pairwise  $F_{ST}$  (Figure 7B). In general, we found that longitude had a stronger effect on  
393 isolation than latitude, with populations showing the strongest differentiation separated  
394 along an east-west, rather than a north-south, axis (Figure 7B). This pattern remained  
395 when the number of populations sampled from Ukraine was reduced to avoid over-  
396 representation (Figure S13).

397

398 To further explore these patterns, we performed a principal component analysis (PCA) on  
399 the allele frequencies of SNPs in short introns. The first three principal components (PC)  
400 explained more than 25% of the total variance (PC1: 16.3%, PC2: 5.4%, PC3: 4.8%,



401 eigenvalues = 599.2, 199.1, and 178.5 respectively; Figure 7C and Figure S14). As  
402 expected, PC1 was strongly correlated with longitude. Despite significant signals of  
403 autocorrelation, as indicated by Moran's test on residuals from linear regressions with  
404 PC1, the association with longitude was not due to spatial autocorrelation, since a spatial  
405 error model also resulted in a significant association. PC2 was similarly, but to a lesser  
406 extent, correlated with longitude and also with altitude. PC3, by contrast, was not  
407 associated with any variable examined (Table 2). None of the major PC axes were  
408 correlated with season, indicating that there were no shared seasonal differences across  
409 samples in our dataset. Hierarchical model fitting based on the first three PC axes resulted  
410 in five distinct clusters (Figure 7C) that were oriented along the axis of PC1, supporting the  
411 notion of strong longitudinal differentiation among European populations. To the best of  
412 our knowledge, such a pronounced longitudinal signature of differentiation has not  
413 previously been reported in European *D. melanogaster*. Remarkably, this pattern is  
414 qualitatively similar to those observed for human populations (Cavalli-Sforza 1966; Xiao *et*  
415 *al.* 2004; Francalacci & Sanna 2008), perhaps consistent with co-migration of this  
416 commensal species.

417

### 418 **Mitochondrial haplotypes also exhibit longitudinal population structure**

419 Our finding that European populations are longitudinally structured is also supported by an  
420 analysis of mitochondrial haplotypes. We identified two main mitochondrial haplotypes in  
421 Europe, separated by at least 41 mutations (between G1.2 and G2.1; Figure 8A). Our  
422 findings are consistent with similar analyses of mitochondrial haplotypes from a North  
423 American *D. melanogaster* population (Cooper *et al.* 2015) as well as from worldwide  
424 samples (Wolff *et al.* 2016), revealing varying degrees of differentiation among haplotypes,  
425 ranging from only a few to hundreds of substitutions. The two G1 subtypes (G1.1 and

426 G1.2) are separated by only four mutations, and the three G2 subtypes are separated by a  
427 maximum of four mutations (between G2.1 and G2.3). The estimated frequency of these  
428 haplotypes varied greatly among populations (Figure 8B). Qualitatively three types of  
429 European populations can be distinguished based on these haplotypes, namely those with  
430 (1) a high frequency (> 60%) of the G1 haplotypes, characteristic of central European  
431 samples, (2) a low frequency (< 40%) of G1 haplotypes, a pattern common for Eastern  
432 European populations in summer, and (3) a combined frequency of G1 haplotypes,  
433 between 40-60%, which is typical of samples from the Iberian Peninsula and from Eastern  
434 Europe in fall (Figure S15A).

435

436 We observed a significant shift in the relative frequencies of the two haplotype classes  
437 between summer and fall samples in only two of the nine possible comparisons among  
438 haplotypes. While there was no correlation between latitude and the combined frequency  
439 of G1 haplotypes, we found a weak but significant negative correlation between G1  
440 haplotypes and longitude ( $r^2 = 0.10$ ;  $p < 0.05$ ), which is consistent with the longitudinal  
441 east-west population structure observed for intronic SNPs. In a subsequent analysis, we  
442 divided the dataset at 20° longitude into an eastern and a western subset since in northern  
443 Europe 20° longitude corresponds to the division of two major climatic zones, namely C  
444 (temperate) and D (cold), according to the Köppen-Geiger climate classification (Peel *et al.*  
445 2007). When splitting the populations in a western (longitude < 20° E) and an eastern  
446 group (longitude > 20° E), we found a clear correlation between longitude and the  
447 combined frequency of G1 haplotypes, explaining as much as 50% of the variation in the  
448 western group (Figure S15B). Similarly, in the eastern populations we found a correlation  
449 between longitude and the combined frequency of G1 haplotypes, which explains  
450 approximately 20% of the variance (Figure S15B). Thus, the data on mitochondrial

451 haplotypes clearly confirm the existence of pronounced east-west population structure and  
452 differentiation in European *D. melanogaster*. While this might be due to climatic selection,  
453 as recently found for clinal mitochondrial haplotypes in Australia (Camus *et al.* 2017), we  
454 can presently not rule out an effect of demography.

455

### 456 **The majority of TEs vary with longitude and altitude**

457 To examine the population genetics of structural variants in our dataset, we first focused  
458 on TEs. The repetitive content of the 48 samples analyzed ranged from 16% to 21% with  
459 respect to nuclear genome size (Figure 9). The vast majority of detected repeats were  
460 transposable elements, mostly represented by long terminal repeats (LTR) and long  
461 interspersed nuclear elements (LINE; Class I), as well as a few DNA elements (Class II).  
462 LTR content best explained total TE content (LINE+LTR+DNA) (Pearson's  $r = 0.87$ ,  $p <$   
463  $0.01$ , vs. DNA  $r = 0.58$ ,  $p = 0.0117$ , and LINE  $r = 0.36$ ,  $p < 0.01$  and Figure S16A).

464

465 We estimated population-wise frequencies of 1,630 TE insertions annotated in the *D.*  
466 *melanogaster* reference genome *v.6.04* using *T-lex2* (Table S7, Fiston-Lavier *et al.* 2010).  
467 On average, 56% of the TEs annotated in the reference genome were fixed in all samples.  
468 The remaining polymorphic TEs usually segregated at low frequency in all samples (Figure  
469 S16A), potentially due to the effect of purifying selection (González *et al.* 2008; Petrov *et*  
470 *al.* 2011; Kofler *et al.* 2012; Cridland *et al.* 2013; Blumenstiel *et al.* 2014). However, we  
471 also observed 142 TE insertions present at intermediate ( $>10\%$  and  $<95\%$ ) frequencies  
472 (Figure S16B), which might be consistent with transposition-selection balance  
473 (Charlesworth *et al.* 1994).

474

475 In each of the 48 samples TE frequency and recombination rate were negatively correlated

476 on a genome-wide level (Spearman rank sum test;  $p < 0.01$ ), as previously reported  
477 (Bartolomé *et al.* 2002; Petrov *et al.* 2011; Kofler *et al.* 2012). Qualitatively, this pattern still  
478 holds when only polymorphic TEs (population frequency  $< 95\%$ ) are analyzed, although it  
479 becomes statistically non-significant for some chromosomes and populations (Table S8).  
480 In either case, the correlation is more negative when using broad-scale, rather than fine-  
481 scale, recombination rate estimates (Materials and methods, Tables S8B, S8D). This  
482 suggests that broad-scale recombination patterns may best capture long-term population  
483 recombination patterns.

484

485 We further tested whether the distribution of TE frequencies among samples could be  
486 explained by geographical or temporal variables. We focused on the 141 TE insertions that  
487 showed frequency variability among samples (interquartile range, (IQR)  $> 10$ ; see  
488 Materials and Methods). Of these, 73 TEs showed significant associations with  
489 geographical or temporal variables after multiple testing correction (Table S9). Note that  
490 we used a conservative  $p$ -value threshold ( $< 0.001$ ), and we did not find significant  
491 residual spatio-temporal autocorrelation among samples for any TE tested (Moran's  $I >$   
492  $0.05$  for all tests; Table S9). Sixteen out of seventy-three TEs were located in regions of  
493 very low recombination ( $0$  cM/Mb for either of the two recombination measures used).  
494 Among the 57 significant TEs located in high recombination regions, we observed  
495 significant correlations of 13 TE's with longitude, of 13 with altitude, of five with latitude,  
496 and of three with season (Table S9). In addition, the frequencies of the other 23 insertions  
497 were significantly correlated with more than one of the above-mentioned variables (Table  
498 S9). These significant TEs were scattered along the main five chromosome arms (Table  
499 S9). Among the 57 significant TEs located in high recombination regions two TE families  
500 were enriched ( $\chi^2$   $p$ -values after Yate's correction  $< 0.05$ ): the LTR 297 family with 11

501 copies, and the DNA *pogo* family with 5 copies (Table S10). We also checked the genomic  
502 localization of the 57 TEs. Most of them (42) were located inside genes: two in 5'UTR, four  
503 in 3'UTR, 18 in the first intron, and 18 TEs in subsequent introns. Additionally, 7 TEs are  
504 <1 kb from the nearest gene, suggesting that these could also affect the regulation of the  
505 nearby genes (Table S9). Interestingly, 14 of these 57 TEs coincide with previously  
506 identified candidate adaptive TEs (Table S9), suggesting that our dataset might be  
507 enriched for adaptive insertions. However, further analyses are needed to discard the  
508 effect of non-selective forces on the patterns observed.

509

### 510 **Inversion polymorphisms in Europe exhibit latitudinal and longitudinal clines**

511 Chromosomal inversions are another class of important and common structural genomic  
512 variants, often exhibiting frequency clines on multiple continents, some of which have been  
513 shown to be adaptive (e.g. Kapun *et al.* 2014; 2016a). However, little is known yet about  
514 the spatial distribution and clinality of inversions in Europe. We used a panel of inversion-  
515 specific marker SNPs (Kapun *et al.* 2014) to test for the presence and quantify the  
516 frequency of six cosmopolitan inversion polymorphisms (*In(2L)t*, *In(2R)NS*, *In(3L)P*,  
517 *In(3R)C*, *In(3R)Mo*, *In(3R)Payne*) in the 48 samples. All sampled populations were  
518 polymorphic for one or more inversions (Figure 10). However, only *In(2L)t* segregated at  
519 substantial frequencies in most populations (average frequency = 20.2%). All other  
520 inversions were either absent or occurred at low frequencies (average frequencies:  
521 *In(2R)NS* = 6.2%, *In(3L)P* = 4%, *In(3R)C* = 3.1%, *In(3R)Mo* = 2.2%, *In(3R)Payne* = 5.7%).

522

523 Despite their overall low frequencies, several inversions exhibited clinal patterns across  
524 space (Table 3). We observed significant latitudinal clines for *In(3L)P*, *In(3R)C* and  
525 *In(3R)Payne*. Although they differed in overall frequencies, *In(3L)P* and *In(3R)Payne*

526 showed latitudinal clines in Europe that are qualitatively similar to the clines previously  
527 observed along the North American and Australian east coasts (Figure S17 and Table  
528 S11, Kapun *et al.* 2016a). For the first time, we also detected a longitudinal cline for *In(2L)t*  
529 and *In(2R)NS*, with both inversions decreasing in frequency from East to West, a result  
530 that is consistent with our finding of strong longitudinal among-population differentiation in  
531 Europe. *In(2L)t* also increased in frequency with altitude (Table 3). Except for *In(3R)C*, we  
532 did not find significant residual spatio-temporal autocorrelation among samples for any  
533 inversion tested (Moran's  $I \approx 0$ ,  $p > 0.05$  for all tests; Table 3), suggesting that our analysis  
534 was not confounded by spatial autocorrelation for most of the inversions. It will be  
535 interesting to examine in future work the extent to which clines in inversions (and other  
536 genomic variants) across Europe are shaped by selection and/or demography.

537

### 538 **European *Drosophila* microbiomes contain trypanosomatids and novel viruses**

539 Finally, we determined the abundance of microbiota associated with *D. melanogaster* from  
540 the Pool-Seq data – these endosymbionts often have crucial functions in affecting the life  
541 history, immunity, hormonal physiology, and metabolic homeostasis of their fly hosts (e.g.,  
542 Trinder *et al.* 2017; Martino *et al.* 2017). The taxonomic origin of a total of 262 million non-  
543 *Drosophila* reads was inferred using MGRAST, which identifies and counts short protein  
544 motifs ('features') within reads (Meyer *et al.* 2008). The largest fraction of protein features  
545 was assigned to *Wolbachia* (on average 53.7%; Figure 11), a well-known endosymbiont of  
546 *Drosophila* (Werren *et al.* 2008). The relative abundance of *Wolbachia* protein features  
547 varied strongly between samples ranging from 8.8% in a sample from the UK to almost  
548 100% in samples from Spain, Portugal, Turkey and Russia (Table 1). Similarly, *Wolbachia*  
549 loads varied 100x between samples if we use the ratio of *Wolbachia* protein features  
550 divided by the number of *Drosophila* sequences retrieved for that sample as a proxy for

551 relative micro-organismal load (for a full table of micro-organismal loads standardized by  
552 *Drosophila* genome coverage see Table S12).

553

554 Acetic acid bacteria of the genera *Gluconobacter*, *Gluconacetobacter*, and *Acetobacter*  
555 were the second largest group, with an average relative abundance of 34.4%.

556 Furthermore, we found evidence for the presence of several genera of Enterobacteria  
557 (*Serratia*, *Yersinia*, *Klebsiella*, *Pantoea*, *Escherichia*, *Enterobacter*, *Salmonella*, and  
558 *Pectobacterium*). *Serratia* occurs only at low frequencies or is absent from most of our  
559 samples, but reaches a very high relative abundance in the Nicosia summer collection  
560 (54.5%). This high relative abundance was accompanied by an 80x increase in *Serratia*  
561 bacterial load. We detected several eukaryotic microorganisms, although they were less  
562 abundant than the bacteria. The fraction of fungal protein features is larger than 3% in only  
563 three of our samples from Finland, Austria and Turkey (Table 1). Interestingly, we detected  
564 the presence of trypanosomatids in 16 of our samples, consistent with other recent  
565 evidence that *Drosophila* can host these organisms (Wilfert *et al.* 2011; Chandler & James  
566 2013; Hamilton *et al.* 2015).

567

568 Our data also allowed us to detect the presence of five different DNA viruses (Table S13).  
569 These included approximately two million reads from *Kallithea* nudivirus (Webster *et al.*  
570 2015), allowing us to assemble the complete *Kallithea* genome for the first time (>300-fold  
571 coverage in the Ukrainian sample UA\_Kha\_14\_46; Genbank accession KX130344). We  
572 also identified around 1000 reads from a novel nudivirus that is closely related to *Kallithea*  
573 virus and to *Drosophila innubila* nudivirus (Unckless 2011) in sample DK\_Kar\_14\_41 from  
574 Karensminde, Denmark (Table 1). These sequences permitted us to identify a publicly  
575 available dataset (SRR3939042: 27 male *D. melanogaster* from Esparto, California;

576 Machado *et al.* 2016) that contained sufficient reads to complete the genome (provisionally  
577 named “*Esparto Virus*”; KY608910). We further identified two novel Densoviruses  
578 (Parvoviridae), which we have provisionally named “*Viltain virus*”, a relative of *Culex*  
579 *pipiens* densovirus found at 94-fold coverage in sample FR\_Vil\_14\_07 (Viltain; KX648535)  
580 and “*Linvill Road virus*”, a relative of *Dendrolimus punctatus* densovirus that was  
581 represented by only 300 reads here, but which has previously been found to have a high  
582 coverage in dataset SRR2396966 from a North American sample of *D. simulans*  
583 (KX648536; Machado *et al.* 2016). In addition, we detected a novel member of the  
584 Bidnaviridae family, “*Vesanto virus*”, a bidensovirus related to *Bombyx mori* densovirus 3  
585 with approximately 900-fold coverage in sample FI\_Ves\_14\_38 (Vesanto; KX648533 and  
586 KX648534), Using a detection threshold of >0.1% of the *Drosophila* genome copy number,  
587 the most commonly detected viruses were *Kallithea virus* (30/48 of the pools) and *Vesanto*  
588 *virus* (25/48), followed by *Linvill Road virus* (7/48) and *Viltain virus* (5/48), with *Esparto*  
589 *virus* being the rarest (2/48). In some samples, the viruses reached strikingly high titers: on  
590 13 occasions the virus genome copy number in the pool exceeded the host genome copy  
591 number, reaching a maximum of nearly 20-fold in Vesanto.

592

593 In summary, our continent-wide analysis of the microbiota associated with flies suggests  
594 that natural populations of European *D. melanogaster* differ greatly in the composition and  
595 relative abundance of microbes and viruses.

596

## 597 **Discussion**

598 In recent years, large-scale population resequencing projects have shed light on the  
599 biology of both model (Mackay *et al.* 2012; Langley *et al.* 2012; Consortium 2015; Lack *et*  
600 *al.* 2015; Alonso-Blanco *et al.* 2016; Lack *et al.* 2016) and non-model organisms (e.g.,



601 Hohenlohe *et al.* 2010; Wolf *et al.* 2010). Such massive datasets contribute significantly to  
602 our growing understanding of the processes that create and maintain genetic variation in  
603 natural populations and of adaptation. However, the relevant spatio-temporal scales for  
604 population genomic analyses remain largely unknown. Here we have applied, for the first  
605 time, a comprehensive sampling and sequencing strategy to European populations of  
606 *Drosophila melanogaster*, allowing us to uncover previously unknown aspects of this  
607 species' population biology.

608

609 A main result from our analyses of SNPs, located in short introns and presumably evolving  
610 neutrally (Parsch *et al.* 2010), is that European *D. melanogaster* populations exhibit very  
611 pronounced longitudinal differentiation, a pattern that – to the best of our knowledge – has  
612 not been observed before for the European continent (for patterns of longitudinal  
613 differentiation in Africa see e.g. Michalakis & Veuille 1996; Aulard *et al.* 2002; Fabian *et al.*  
614 2015). Genetic differentiation was greatest between populations from eastern and western  
615 Europe (Figure 7). The eastern populations included those from the Ukraine, Russia, and  
616 Turkey, as well as one from eastern Austria, which suggests that there may be a region of  
617 restricted gene flow in south-central Europe. However, populations from Finland and  
618 Cyprus are more similar to western populations than to eastern populations, possibly as a  
619 result of migration along shipping routes in the Baltic and Mediterranean seas. More data  
620 from populations in the unsampled, intermediate regions are needed to better delineate  
621 the geographic limits of the eastern and western population groups. Consistent with the  
622 strong differentiation between eastern and western populations, our PCA analysis  
623 revealed that longitude was the major factor associated with among-population  
624 divergence, with no significant effect of latitude (Figure 7C; Table 2). Thus, the patterns of  
625 neutral genetic differentiation in Europe contrast with those previously reported for North

626 America, where latitude impacts neutral differentiation (Machado *et al.* 2016; Kapun *et al.*  
627 2016a). However, note that our analysis does not exclude the existence of clinally varying  
628 polymorphisms in European populations outside short introns: for example, we detected  
629 latitudinal frequency clines both for TEs and inversion polymorphisms (see below). A  
630 detailed analysis of clinal variation in the *DrosEU* data is beyond the scope of this paper  
631 and currently under way.

632

633 The mitochondrial genome and several chromosomal inversions and TEs (also see below)  
634 showed similar patterns of differentiation as the rest of the genome, with the main axis of  
635 differentiation being longitudinal. Uncovering the extent to which this pattern might be  
636 driven by demography and/or selection, and the underlying environmental correlates  
637 (including any potential role of co-migration with human populations), will be an important  
638 task for future analyses. Due to the high density of samples and the large number of SNP  
639 markers, our results show that European populations of *D. melanogaster* exhibit much  
640 more differentiation and structure than previously thought (e.g., Baudry *et al.* 2004;  
641 Dieringer *et al.* 2005; Schlötterer *et al.* 2006; Nunes *et al.* 2008; Mateo *et al.* 2018).

642

643 Within the eastern and western population groups there was a low – but detectable – level  
644 of genetic differentiation among populations, including those that are geographically close  
645 (Figure 7C). These population differences persisted over a timespan of at least 2–3  
646 months, as there was less genetic differentiation between the summer and fall samples of  
647 the 13 locations sampled at multiple time points than between neighboring populations  
648 (Figure 7C). Thus, while the weak but significant signal of isolation by distance suggests  
649 homogenizing gene flow across geography, there is seasonally stable differentiation  
650 among populations. The season in which samples were collected did not show a

651 significant association with genetic differentiation, except when considered in conjunction  
652 with longitude or altitude (Table 2). Note, however, that the data here are from a single  
653 year only; demonstrating recurrent shifts in SNP frequencies due to temporally varying  
654 selection will require analysis of additional annual samples.

655

656 Our Pool-Seq data also allowed us to characterize geographic patterns in both inversions  
657 and TEs. In marked contrast to putatively neutral SNPs, the frequencies of several  
658 chromosomal inversions, including *In(3L)P*, *In(3R)C*, and *In(3R)Payne*, showed a  
659 significant correlation with latitude (Table 3). For *In(3L)P* and *In(3R)Payne*, the latitudinal  
660 clines were in qualitative agreement with parallel clines reported in North America and  
661 Australia, with the inversions decreasing in frequency as distance from the equator  
662 increases (Mettler *et al.* 1977; Knibb *et al.* 1981; Fabian *et al.* 2012; Kapun *et al.* 2014;  
663 Rane *et al.* 2015; Kapun *et al.* 2016a). This suggests that the inversions may contain  
664 genetic variants that are better adapted to warmer environments than to temperate  
665 climates. Note, however, that the overall frequencies of these inversions are low within  
666 Europe (<5%), indicating that they might play only a minor role in local adaptation to  
667 European habitats. Some euchromatic TE insertions also showed geographic or seasonal  
668 patterns of variation (Table S7), suggesting that they have the potential to play a role in  
669 local adaptation, particularly as many of them are located in regions where they might  
670 affect gene regulation. Importantly, several inversions and TEs also showed longitudinal  
671 frequency gradients, thus supporting the notion that European populations exhibit marked  
672 longitudinal differentiation.

673

674 We also examined signatures of selective sweeps in our dataset. We found 144 genomic  
675 regions that showed signatures of hard sweeps (i.e., in regions of normal recombination

676 (cM/Mb  $\geq 0.5$ ), but with reduced variation and negative Tajima's  $D$  ( $D \leq -0.8$ ) in all  
677 European populations (Figure 6, Table S6). Four of these regions were identified in  
678 previous studies as potential targets for positive selection.

679

680 The first region, at the center of chromosome arm  $2R$  (Figure 6A), was previously found to  
681 be strongly differentiated between African and North American populations (Langley *et al.*  
682 2012) and contains two genes, *Cyp6g1* and *Hen-1*, that are associated with recent, strong  
683 selection. The cytochrome P450 gene *Cyp6g1* that has been linked to insecticide  
684 resistance (Daborn *et al.* 2002; Schmidt *et al.* 2010), shows evidence for recent selection  
685 independently in both *D. melanogaster* and *D. simulans* (Schlenke & Begun 2003; Catania  
686 *et al.* 2004), and is associated with a large differentiated region in the Australian latitudinal  
687 cline (Kolaczkowski *et al.* 2011a). *Hen-1*, a methyltransferase involved in maturation of  
688 small RNAs involved in virus and TE suppression, showed marginally non-significant  
689 evidence for selective sweeps in North American and African populations of *D.*  
690 *melanogaster* (Kolaczkowski *et al.* 2011b).

691

692 The second region previously implicated in a selective sweep is on chromosome arm  $3L$   
693 (Table S6) and is centered around the chimeric gene *CR18217*, which formed from the  
694 fusion of a gene encoding a DNA-repair enzyme (*CG4098*) and a centriole gene (*spd-2*;  
695 Rogers & Hartl 2012). *CR18217* appears to be unique to *D. melanogaster*, but, in spite of  
696 its recent origin, segregates at frequencies of around 90% (Rogers & Hartl 2012),  
697 consistent with a recent strong sweep in this region of the genome. This putative sweep  
698 region also spans *Prosbeta6*, which (like HDAC) encodes a gene involved in proteolysis  
699 (Flybase v. FB2017\_05; Gramates *et al.* 2017). *Prosbeta6* also shows homology to genes  
700 involved in immune function (Lyne *et al.* 2007; Handu *et al.* 2015), which might explain

701 why it has been a target of positive selection.

702

703 The third previously characterized sweep region, surrounding the *wapl* gene on the X  
704 chromosome, was identified as showing evidence of a strong selective sweep (or sweeps)  
705 in both African and European *D. melanogaster* populations (Beisswanger *et al.* 2006;  
706 Boitard *et al.* 2012). The gene(s) targeted by selection is unclear, but is most likely *ph-p* in  
707 Europe and *ph-p* or *ph-d* in Africa (Beisswanger *et al.* 2006). These genes are tandem  
708 duplicates involved in the Polycomb response pathway, which functions as an epigenetic  
709 repressor of transcription (reviewed in Kassis *et al.* 2017).

710

711 The fourth previously known putative sweep region, originally identified in African  
712 populations of *D. melanogaster*, is also on the X chromosome, but 30 cM closer to the  
713 telomere and thus not implicating the *wapl* sweep region (Beisswanger *et al.* 2006; Boitard  
714 *et al.* 2012). Selection in this region has been attributed to the *HDAC6* gene (Svetec *et al.*  
715 2009). *HDAC6*, although nominally a histone deacetylase, actually functions as a central  
716 player in managing cytotoxic assaults, including in transport and degradation of misfolded  
717 protein aggregates (reviewed in Matthias *et al.* 2008; Svetec *et al.* 2009).

718

719 Our data thus support the widespread occurrence of these previously identified sweeps in  
720 many populations in Europe. Notably, practically all European populations showed  
721 reduced variation and negative Tajima's *D* in the identified sweep regions. This is  
722 consistent with the sweeps either pre-dating the colonization of Europe (e.g., Beisswanger  
723 *et al.* 2006) or having swept across Europe more recently (also see Stephan 2010 for  
724 discussion). In addition, we further uncovered several novel genomic regions showing  
725 evidence for hard sweeps (Table S6), which represent a valuable source for future in-

726 depth analyses of signals for adaptive evolution in European *Drosophila*.

727

728 Finally, we used our Pool-Seq data to identify microbes and viruses and to quantify their  
729 presence in natural populations of *D. melanogaster* across the European continent.

730 *Wolbachia* was the most abundant bacterial genus associated with the flies, but its relative

731 abundance and load varied greatly among samples. The second most abundant bacterial

732 taxon was acetic acid bacteria (Acetobacteraceae), a group previously found among the

733 most abundant bacteria in natural *D. melanogaster* isolates (Chandler *et al.* 2011;

734 Staubach *et al.* 2013). Other microbes were highly variable abundance in relative

735 abundance. For example, *Serratia* abundance was low in most populations, but very high

736 in the Nicosia sample, which might reflect that there are individuals in the Nicosia sample

737 that carry a systemic *Serratia* infection generating high bacterial loads. Future sampling

738 may shed light on the temporal stability and/or population specificity of these patterns.

739 Contrary to our expectation, we found relatively few yeast sequences. This is something of

740 a surprise, because yeasts are commonly found on rotting fruit, the main food substrate of

741 *D. melanogaster*, and have been found in association with *Drosophila* before (Barata *et al.*

742 2012; Chandler *et al.* 2012). This suggests that although yeasts can attract flies and play a

743 role in food choice (Becher *et al.* 2012; Buser *et al.* 2014), they are not highly prevalent in

744 or on *D. melanogaster* bodies. Although trypanosomatids have been reported in

745 association with *Drosophila* before (Wilfert *et al.* 2011; Chandler & James 2013; Hamilton

746 *et al.* 2015), our study provides the first systematic detection across a wide geographic

747 range in *D. melanogaster*.

748

749 Despite being host to a wide diversity of RNA viruses (Huszar & Imler 2008; Webster *et al.*

750 2015), only three DNA viruses have previously been reported in association with the

751 *Drosophilidae*, and only one from *D. melanogaster* (Unckless 2011; Webster *et al.* 2015;  
752 2016). Here, we discovered four new DNA viruses. While it is not possible to directly  
753 estimate viral prevalence from pooled sequencing data, we found that the DNA viruses of  
754 *D. melanogaster* can be widespread, with *Kallithea* virus detectable at a low level in most  
755 populations.

756

757 A striking qualitative pattern in our microbiome data is the high level of variability among  
758 populations in the composition and relative amounts of different microbiota and viruses.  
759 Thus, an interesting open question is to what extent geographic differences in microbiota  
760 might contribute to phenotypic differences and local adaptation among fly populations,  
761 especially given that there might be tight and presumably local co-evolutionary interactions  
762 between fly hosts and their endosymbionts (e.g., Haselkorn *et al.* 2009; Richardson *et al.*  
763 2012; Staubach *et al.* 2013; Kriesner *et al.* 2016).

764

765 In conclusion, our study demonstrates that extensive sampling on a continent-wide scale  
766 and pooled sequencing of natural populations can reveal new aspects of population  
767 biology, even for a well-studied species such as *D. melanogaster*. Such extensive  
768 population sampling is feasible due to the close cooperation and synergism within our  
769 international consortium. Our efforts in Europe are paralleled in North America by the  
770 *Drosophila* Real Time Evolution Consortium (*Dros-RTEC*), with whom we are currently  
771 collaborating to compare population genomic data across continents. In future years, our  
772 consortia will continue to sample and sequence European and North American *Drosophila*  
773 populations to study these populations with increasing spatial and temporal resolution,  
774 providing an unprecedented resource for the *Drosophila* and population genetics  
775 communities.

776

## 777 **Materials and Methods**

778 The *DrosEU* dataset analyzed here consists of 48 samples of *D. melanogaster* collected  
779 from 32 geographical locations at different time-points across the European continent,  
780 through a joint effort of 18 European research groups in 2014 (see Figure 3). Field  
781 collections were performed with baited traps using a standardized protocol (see  
782 Supplementary file for details). Up to 40 males from each collection were pooled, and DNA  
783 extracted from each, using a standard phenol-chloroform based protocol. Each sample  
784 was processed in a single pool (Pool-Seq; Schlötterer *et al.* 2014), with each pool  
785 consisting of at least 33 wild-caught individuals. To exclude morphologically similar and  
786 co-occurring species, such as *D. simulans*, as potential contaminants from the samples,  
787 we only used wild-caught males and distinguished among species by examining genital  
788 morphology. Despite this precaution, we identified a low level of *D. simulans* contamination  
789 in our samples, and further steps were thus taken to exclude *D. simulans* sequences from  
790 our analysis (see below). The *DrosEU* dataset represents the most comprehensive spatio-  
791 temporal sampling of European *D. melanogaster* populations available to date (Table 1,  
792 Figure 3).

793

### 794 **DNA extraction, library preparation and sequencing**

795 DNA was extracted from pools of 33–40 males per sample after joint homogenization with  
796 bead beating and standard phenol/chloroform extraction. A detailed extraction protocol can  
797 be found in the Supporting Information file. In brief, 500 ng of DNA in a final volume of 55.5  
798  $\mu$ l were sheared with a Covaris instrument (Duty cycle 10, intensity 5, cycles/burst 200,  
799 time 30) for each sample separately. Library preparation was performed using NEBNext  
800 Ultra DNA Lib Prep-24 and NebNext Multiplex Oligos for Illumina-24 following the



801 manufacturer's instructions. Each pool was sequenced as paired-end fragments on a  
802 Illumina NextSeq 500 sequencer at the Genomics Core Facility of Pompeu Fabra  
803 University (UPF; Barcelona, Spain). Samples were multiplexed in five batches of 10  
804 samples each, except for one batch that contained only 8 samples (see Supplementary  
805 Table S1 for further information). Each multiplexed batch was sequenced on four lanes to  
806 obtain an approximate 50x raw coverage for each sample. Reads were sequenced to a  
807 length of 151 bp with a median insert size of 348 bp (ranging from 209 to 454 bp).

808

### 809 **Mapping pipeline and variant calling**

810 Prior to mapping, we trimmed and filtered raw FASTQ reads to remove low-quality bases  
811 (minimum base PHRED quality = 18; minimum sequence length = 75 bp) and sequencing  
812 adaptors using cutadapt (v. 1.8.3; Martin 2011). We only retained read pairs for which both  
813 reads fulfilled our quality criteria after trimming. FastQC analyses of trimmed and quality  
814 filtered reads showed overall high base-qualities (median ranging from 29 to 35 in all 48  
815 samples) and indicated a loss of ~1.36% of all bases after trimming relative to the raw  
816 data. We used bwa mem (v. 0.7.15; Li 2013) with default parameters to map trimmed  
817 reads against a compound reference genome consisting of the genomes from *D.*  
818 *melanogaster* (v.6.12) and genomes from common commensals and pathogens, including  
819 *Saccharomyces cerevisiae* (GCF\_000146045.2), *Wolbachia pipientis* (NC\_002978.6),  
820 *Pseudomonas entomophila* (NC\_008027.1), *Commensalibacter intestine*  
821 (NZ\_AGFR000000000.1), *Acetobacter pomorum* (NZ\_AEUP000000000.1), *Gluconobacter*  
822 *morbifer* (NZ\_AGQV000000000.1), *Providencia burhodogranariea* (NZ\_AKKL000000000.1),  
823 *Providencia alcalifaciens* (NZ\_AKKM01000049.1), *Providencia rettgeri*  
824 (NZ\_AJSB000000000.1), *Enterococcus faecalis* (NC\_004668.1), *Lactobacillus brevis*  
825 (NC\_008497.1), and *Lactobacillus plantarum* (NC\_004567.2), to avoid paralogous

826 mapping. We used Picard (v.1.109; <http://picard.sourceforge.net>) to remove duplicate  
827 reads and reads with a mapping quality below 20. In addition, we re-aligned sequences  
828 flanking insertions-deletions (indels) with GATK (v3.4-46; McKenna *et al.* 2010).  
829  
830 After mapping, Pool-Seq samples were tested for DNA contamination from *D. simulans*.  
831 To do this, we used a set of SNPs known to be divergent between *D. simulans* and *D.*  
832 *melanogaster* and assessed the frequencies of *D. simulans*-specific alleles following the  
833 approach of Bastide *et al.* (2013). We combined the genomes of *D. melanogaster* (v.6.12)  
834 and *D. simulans* (Hu *et al.* 2013) and separated species-specific reads for samples with a  
835 contamination level > 1% via competitive mapping against the combined references using  
836 the pipeline described above. Custom software was used to remove reads uniquely  
837 mapping to *D. simulans*. In 9 samples, we identified contamination with *D. simulans*,  
838 ranging between 1.2 % and 8.7% (Table S1). After applying our decontamination pipeline,  
839 contamination levels dropped below 0.4 % in all 9 samples.  
840  
841 We used *Qualimap* (v. 2.2., Okonechnikov *et al.* 2016) to evaluate average mapping  
842 qualities per population and chromosome, which ranged from 58.3 to 58.8 (Table S1). We  
843 found heterogeneous sequencing depths among the 48 samples, ranging from 34x to  
844 115x for autosomes and from 17x to 59x for X-chromosomes (Figure S1, Table S1). We  
845 then combined individual BAM files from all samples into a single *mpileup* file using  
846 *samtools* (v. 1.3; Li & Durbin 2009). Due to the large number of Pool-Seq datasets  
847 analyzed in parallel, we had to implement quality control criteria for all libraries jointly in  
848 order to call SNPs. To accomplish this, we implemented a novel custom SNP calling  
849 software to call SNPs with stringent heuristic parameters (PoolSNP; see Supplementary  
850 Information), available at Dryad (doi: <https://doi.org/10.5061/dryad.rj1gn54>). A site was

851 considered polymorphic if (1) the minimum coverage from all samples was greater than  
852 10x, (2) the maximum coverage from all samples was less than the 95th coverage  
853 percentile for a given chromosome and sample (to avoid paralogous regions duplicated in  
854 the sample but not in the reference), (3) the minimum read count for a given allele was  
855 greater than 20x across all samples pooled, and (4) the minimum read frequency of a  
856 given allele was greater than 0.001 across all samples pooled. The above threshold  
857 parameters were optimized based on simulated Pool-Seq data in order to maximize true  
858 positives and minimize false positives (see Figure S18 and Supporting Information).  
859 Additionally, we excluded SNPs (1) for which more than 20% of all samples did not fulfill  
860 the above-mentioned coverage thresholds, (2) which were located within 5 bp of an indel  
861 with a minimum count larger than 10x in all samples pooled and (3) which were located  
862 within known transposable elements (TE) based on the *D. melanogaster* TE library v.6.10.  
863 We further annotated our final set of SNPs with SNPeff (v.4.2; Cingolani *et al.* 2012) using  
864 the Ensembl genome annotation version BDGP6.82 (Figure 3).

865

### 866 **Combined and population-specific site frequency spectra (SFS)**

867 We quantified the amount of allelic variation with respect to different SNP classes. For this,  
868 we first combined the full dataset across all 48 samples and used the SNPeff annotation  
869 (see above) to classify the SNPs into four classes (intergenic, intronic, non-synonymous,  
870 and synonymous). For each class, we calculated the site frequency spectrum (SFS) based  
871 on minor allele frequencies for the X-chromosome and the autosomes, as well as for each  
872 sample and chromosomal arm separately, by counting alleles in 50 frequency bins of size  
873 0.01.

874

### 875 **Genetic variation in Europe**

876 We characterized patterns of genetic variation among the 48 samples by estimating three  
877 standard population genetic parameters:  $\pi$ , Watterson's  $\theta$  and Tajima's  $D$  (Watterson  
878 1975; Nei 1987; Tajima 1989). We focused on SNPs located on the five major  
879 chromosomal arms ( $X$ ,  $2L$ ,  $2R$ ,  $3L$ ,  $3R$ ) and calculated sample-wise  $\pi$ ,  $\theta$  and Tajima's  $D$   
880 with corrections for Pool-Seq data (Kofler *et al.* 2011). Since PoPoolation, the most  
881 commonly used software for population genetics inference from Pool-Seq data, does not  
882 allow using predefined SNPs (which was desirable for our analyses), we implemented  
883 corrected population genetic estimators described in Kofler *et al.* (2011) in Python  
884 (PoolGen; available at Dryad; doi: <https://doi.org/10.5061/dryad.rj1gn54>). Before  
885 calculating the estimators, we subsampled the data to an even coverage of 40x for the  
886 autosomes and 20x for the  $X$ -chromosome to control for the sensitivity to coverage  
887 variation of Watterson's  $\theta$  and Tajima's  $D$  (Korneliussen *et al.* 2013). At sites with greater  
888 than 40x coverage, we randomly subsampled reads to 40x without replacement; at sites  
889 with below 40x coverage, we sampled reads 40 times with replacement. Using  $R$  (R  
890 Development Core Team 2009), we calculated sample-wise chromosome-wide averages  
891 for autosomes and  $X$  chromosomes separately and tested for correlations of  $\pi$ ,  $\theta$  and  
892 Tajima's  $D$  with latitude, longitude, altitude, and season using a linear regression model of  
893 the following form:  $y_i = Lat + Lon + Alt + Season + \varepsilon_i$ , where  $y_i$  is either  $\pi$ ,  $\theta$  and  $D$ . Here,  
894 latitude, longitude, and altitude are continuous predictors (Table 1), while 'season' is a  
895 categorical factor with two levels  $S$  ("summer") and  $F$  ("fall"), corresponding to collection  
896 dates before and after September 1<sup>st</sup>, respectively. We chose this arbitrary threshold for  
897 consistency with previous studies (Bergland *et al.* 2014; Kapun *et al.* 2016a). To further  
898 test for residual spatio-temporal autocorrelation among the samples (Kühn & Dormann  
899 2012), we calculated Moran's  $I$  (Moran 1950) with the  $R$  package *spdep* (v.06-15., Bivand  
900 & Piras 2015). To do this, we used the residuals of the above-mentioned models, as well

901 as matrices defining pairs of samples as neighbors weighted by geographical distances  
902 between the locations (samples within 10° latitude/longitude were considered neighbors).  
903 Whenever these tests revealed significant autocorrelation (indicating non-independence of  
904 the samples), we repeated the above-mentioned regressions using spatial error models as  
905 implemented in the *R* package *spdep*, which incorporate spatial effects through weighted  
906 error terms, as described above.

907

908 To test for confounding effects of variation in sequencing errors between runs, we  
909 extended the above-mentioned linear models including the run ID as a random factor  
910 using the *R* package *lme4* (v.1.1-14; see Supporting Information). Preliminary analyses  
911 showed that this model was not significantly better than simpler models, so we did not  
912 include sequencing run in the final analysis (see Supporting information and Table S4).

913

914 To investigate genome-wide patterns of variation, we averaged  $\pi$ ,  $\theta$ , and  $D$  in 200 kb non-  
915 overlapping windows for each sample and chromosomal arm separately and plotted the  
916 distributions in *R*. In addition, we calculated Tajima's  $D$  in 50 kb sliding windows with a  
917 step size of 10 kb to investigate fine-scale deviations from neutral expectations. We  
918 applied heuristic parameters to identify genomic regions harboring potential candidates for  
919 selective sweeps. To identify candidate regions with sweep patterns across most of the 48  
920 samples, we searched for windows with log-transformed recombination rates  $\geq 0.5$ ,  
921 pairwise nucleotide diversity ( $\pi \leq 0.004$ ), and average Tajima's  $D$  across all populations  $\leq$   
922 0.8 (5% percentile). To identify potential selective sweeps restricted to a few population  
923 samples only, we searched for regions characterized as above but allowing one or more  
924 samples with Tajima's  $D$  being more than two standard deviations smaller than the  
925 window-wise average. To account for the effects of strong purifying selection in gene-rich

926 genomic regions which can result in local negative Tajima's  $D$  (Tajima 1989) and thus  
927 confound the detection of selective sweeps, we repeated the analysis based on silent sites  
928 (4-fold degenerate sites, SNPs in short introns of  $\leq 60$  bp lengths and SNPs in intergenic  
929 regions in  $\geq 2000$  bp distance to the closest gene) only. Despite of the reduction in  
930 polymorphic sites available for this analysis, we found highly consistent sweep regions and  
931 therefore proceeded with the full SNP datasets, which provided better resolution (results  
932 not shown)

933

934 For statistical analysis, the diversity statistics were log-transformed to normalize the data.  
935 We then tested for correlations between  $\pi$  and recombination rate using  $R$  in 100 kb non-  
936 overlapping windows and plotted these data using the *ggplot2* package (v.2.2.1., Wickham  
937 2016). We used two different recombination rate measurements: (i) a fine-scale, high  
938 resolution genomic recombination rate map based on millions of SNPs in a small number  
939 of strains (Comeron *et al.* 2012), and (ii) the broad-scale Recombination Rate Calculator  
940 based on Marey maps generated by laboratory cross data fitting genetic and physical  
941 positions of 644 markers to a third-order polynomial curve for each chromosome arm  
942 (Fiston-Lavier *et al.* 2010). Both measurements were converted to version 6 of the  $D$ .  
943 *melanogaster* reference genome to match the genomic position of  $\pi$  estimates (see  
944 above).

945

#### 946 **SNP counts and overlap with other datasets**

947 We used the panel of SNPs identified in the *DrosEU* dataset (available at Dryad; doi:  
948 <https://doi.org/10.5061/dryad.rj1gn54>) to describe the overlap in SNP calls with other  
949 published *D. melanogaster* population data: the *Drosophila* Population Genomics Project 3  
950 (DPGP3) from Siavonga, Zambia (69 non-admixed lines; Lack *et al.* 2015; 2016) and the

951 *Drosophila* Genetic Reference Panel (DGRP) from Raleigh, North Carolina, USA (205  
952 inbred lines; Mackay *et al.* 2012; Huang *et al.* 2014). For these comparisons, we focused  
953 on biallelic SNPs on the 5 major chromosome arms. We used *bwa mem* for mapping and  
954 a custom pipeline for heuristic SNP calling (PoolSNP; Figure 3). To make the data from  
955 the 69 non-admixed lines from Zambia (Lack *et al.* 2015; 2016) comparable to our data,  
956 we reanalyzed these data using our pipeline for mapping and variant calling (Figure 3).  
957 The VCF file of the DGRP data was downloaded from <http://dgrp2.gnets.ncsu.edu/> and  
958 converted to coordinates according to the *D. melanogaster* reference genome v.6. We  
959 depicted the overlap of SNPs called in the three different populations using elliptic Venn  
960 diagrams with *eulerAPE* software (v3 3.0.0., Micallef & Rodgers 2014). While the *DrosEU*  
961 data were generated from sequencing pools of wild-caught individuals, both the DGRP  
962 and DPGP3 data are based on individual sequencing of inbred lines and haploid  
963 individuals, respectively.

964

### 965 **Genetic differentiation and population structure in European populations**

966 To estimate genome-wide pairwise genetic differences, we used custom software to  
967 calculate SNP-wise  $F_{ST}$  using the approach of Weir and Cockerham (1984). We estimated  
968 SNP-wise  $F_{ST}$  for all possible pairwise combinations among samples. For each sample, we  
969 then averaged  $F_{ST}$  across all SNPs for all pairwise combinations that include this particular  
970 sample and finally ranked the 48 population samples by overall differentiation.

971

972 We inferred demographic patterns in European populations by focusing on 21,008  
973 putatively neutrally evolving SNPs located in small introns (less than 60 bp length; Haddrill  
974 *et al.* 2005; Singh *et al.* 2009; Parsch *et al.* 2010; Clemente & Vogl 2012; Lawrie *et al.*  
975 2013) that were at least 200 kb distant from the major chromosomal inversions (see

976 below). To assess isolation by distance (IBD), we averaged  $F_{ST}$  values for each sample  
977 pair across all neutral markers and calculated geographic distances between samples  
978 using the haversine formula (Green & Smart 1985) which takes the spherical curvature of  
979 the planet into account. We tested for correlations between genetic differentiation and  
980 geographic distance using Mantel tests using the *R* package *ade4* (v.1.7-8., Dray & Dufour  
981 2007) with 1,000,000 iterations. In addition, we plotted the 5% smallest and 5% largest  $F_{ST}$   
982 values from all 1,128 pairwise comparisons among the 48 population samples onto a map  
983 to visualize geographic patterns of genetic differentiation. From these putatively neutral  
984 SNPs, we used observed  $F_{ST}$  on the autosomes ( $F_{aut}$ ) to calculate the expected  $F_{ST}$  on X  
985 chromosomes ( $F_X$ ) as in Machado *et al.* (2016) using the equation

986

987 
$$F_X = 1 - \left[ \frac{9(z+1) * (1 - F_{aut})}{8(2z+1) - (1 - F_{aut}) * (7z-1)} \right]$$

988

989 where  $z$  is the ratio of effective population sizes of males ( $N_m$ ) and females ( $N_f$ ),  $N_m/N_f$   
990 (Ramachandran *et al.* 2004). For the purposes of this study we assume  $z = 1$ .

991

992 We further investigated genetic variation in our dataset by principal component analysis  
993 (PCA) based on allele frequencies of the neutral marker SNPs described above. We used  
994 the *R* package *LEA* (v. 1.2.0., Frichot *et al.* 2013) and performed PCA on unscaled allele  
995 frequencies as suggested by Menozzi *et al.* (1978) and Novembre and Stephens (2008).  
996 We focused on the first three principal components (PCs) and employed a model-based  
997 approach as implemented in the *R* package *mclust* (v. 5.2., Fraley & Raftery 2012) to  
998 identify the most likely number of clusters based on maximum likelihood and assigned  
999 population samples to clusters by  $k$ -means clustering in *R* (R Development Core Team  
1000 2009). Finally, we examined the first three PCs for correlations with latitude, longitude,



1001 altitude, and season using general linear models and tested for spatial autocorrelation as  
1002 described above. A Bonferroni-corrected  $\alpha$  threshold ( $\alpha' = 0.05/3 = 0.017$ ) was used to  
1003 account for multiple testing.

1004

## 1005 **Mitochondria**

1006 To obtain consensus mitochondrial sequences for each of the 48 European populations,  
1007 reads from individual FASTQ files were aligned and minor variants replaced by the major  
1008 variant using *Coral* (Salmela & Schröder 2011). This way, ambiguities that might prevent  
1009 the growth of contigs from reads during the assembly process can be eliminated. For each  
1010 population, a genome assembly was obtained using *SPAdes* using standard parameters  
1011 and *k*-mers of size 21, 33, 55, and 77 (Bankevich *et al.* 2012) and the corrected FASTQ  
1012 files. Mitochondrial contigs were retrieved by *blastn*, using the *D. melanogaster* NC  
1013 024511 sequence as a query and each genome assembly as the database. To avoid  
1014 nuclear mitochondrial DNA segments (numts), we ensured that only contigs with a much  
1015 higher coverage than the average coverage of the genome were retrieved. When multiple  
1016 contigs were available for the same region, the one with the highest coverage was  
1017 selected. Possible contamination with *D. simulans* was assessed by looking for two or  
1018 more consecutive sites that show the same variant as *D. simulans* and looking for  
1019 alternative contigs for that region with similar coverage. As an additional quality control  
1020 measure, we also examined the presence of pairs of sites showing four gametic types  
1021 using *DNAsp* 6 (Rozas *et al.* 2017) – given that there is no recombination in mitochondrial  
1022 DNA no such sites are expected. The very few sites presenting such features were  
1023 rechecked by looking for alternative contigs for that region and were corrected if needed.  
1024 The uncorrected raw reads for each population were mapped on top of the different  
1025 consensus haplotypes using *Express* as implemented in *Trinity* (Grabherr *et al.* 2011). If

1026 most reads for a given population mapped to the consensus sequence derived for that  
1027 population the consensus sequence was retained, otherwise it was discarded as a  
1028 possible chimera between different mitochondrial haplotypes. The repetitive mitochondrial  
1029 hypervariable region is difficult to assemble and was therefore not used; the mitochondrial  
1030 region was thus analyzed as in Cooper *et al.* (2015). Mitochondrial genealogy was  
1031 estimated using statistical parsimony (TCS network; Clement *et al.* 2000), as implemented  
1032 in *PopArt* (<http://popart.otago.ac.nz>), and the surviving mitochondrial haplotypes.  
1033 Frequencies of the different mitochondrial haplotypes were estimated from FPKM values  
1034 using the surviving mitochondrial haplotypes and expressed as implemented in *Trinity*  
1035 (Grabherr *et al.* 2011).

1036

### 1037 **Transposable elements**

1038 To quantify the transposable element (TE) abundance in each sample, we assembled and  
1039 quantified the repeats from unassembled sequenced reads using *dnaPipeTE* (v.1.2. ,  
1040 Goubert *et al.* 2015). The vast majority of high-quality trimmed reads were longer than 135  
1041 bp. We thus discarded reads less than 135 bp before sampling. Reads matching mtDNA  
1042 were filtered out by mapping to the *D. melanogaster* reference mitochondrial genome  
1043 (NC\_024511.2. 1) with *bowtie2* (v. 2.1.0., Langmead & Salzberg 2012). Prokaryotic  
1044 sequences, including reads from symbiotic bacteria such as *Wolbachia*, were filtered out  
1045 from the reads using the implementation of *blastx* (translated nucleic vs. protein database)  
1046 vs. the non-redundant protein database (nr) using *DIAMOND* (v. 0.8.7., Buchfink *et al.*  
1047 2015). To quantify TE content, we subsampled a proportion of the raw reads (after  
1048 filtering) corresponding to a genome coverage of 0.1X (assuming a genome size of 175  
1049 MB), and then assembled these reads with *Trinity* assembler (Grabherr *et al.* 2011). Due  
1050 to the low coverage of the genome obtained with the subsampled reads, only repetitive

1051 DNA present in multiple copies should be fully assembled (Goubert *et al.* 2015). We  
1052 repeated this process with three iterations per sample, as recommended by the program  
1053 guidelines, to assess the repeatability of the estimates.  
1054  
1055 We further estimated frequencies of previously characterized TEs present in the reference  
1056 genome with *T-lex2* (v. 2.2.2., Fiston-Lavier *et al.* 2015), using all annotated TEs (5,416  
1057 TEs) in version 6.04 of the *Drosophila melanogaster* genome from flybase.org (Gramates  
1058 *et al.* 2017). For 108 of these TEs, we used the corrected coordinates as described in  
1059 Fiston-Lavier *et al.* (2015), based on the identification of target site duplications at the site  
1060 of the insertion. We excluded TEs nested or flanked by other TEs (<100 bp on each side  
1061 of the TE), and TEs which are part of segmental duplications, since *T-lex2* does not  
1062 provide accurate frequency estimates in complex regions (Fiston-Lavier *et al.* 2015). We  
1063 additionally excluded the INE-1 TE family, as this TE family is ancient, with thousands of  
1064 insertions in the reference genome, which appear to be mostly fixed (2,234 TEs; Kapitonov  
1065 & Jurka 2003).  
1066  
1067 After applying these filters, we were able to estimate frequencies of 1,630 TE insertions  
1068 from 113 families from the three main orders, LTR, non-LTR, and DNA across all *DrosEU*  
1069 samples. *T-lex2* contains three main modules: (i) the presence detection module, (ii) the  
1070 absence detection module, and (iii) the combine module, which joins the results from the  
1071 former two detection modules. In the presence module, *T-lex2* uses *Maq* (v. 0.7.1., Li *et al.*  
1072 2008) for the mapping of reads. As *Maq* only accepts reads 127 bp or shorter, we cut the  
1073 trimmed reads following the general pipeline (Figure 3) and then used *Trimmomatic* (v.  
1074 0.35; Bolger *et al.* 2014) to cut trimmed reads longer than 100 bp into two equally sized  
1075 fragments using CROP and HEADCROP parameters. Only the presence module was run

1076 with the cut reads.

1077

1078 To avoid inaccurate TE frequency estimates due to very low numbers of reads, we only  
1079 considered frequency estimates based on at least 3 reads. Despite the stringency of *T-*  
1080 *lex2* to select only high-quality reads, we additionally discarded frequency estimates  
1081 supported by more than 90 reads, i.e. 3 times the average coverage of the sample with the  
1082 lowest coverage (CH\_Cha\_14\_43, Table 1), in order to avoid non-unique mapping reads.  
1083 This filtering allows to estimate TE frequencies for ~96% (92.9% to 97.8%) of the TEs in  
1084 each population. For 85% of the TEs, we were able to estimate their frequencies in more  
1085 than 44 out of 48 *DrosEU* samples.

1086

1087 We tested for correlations between TE insertion frequencies and recombination rates  
1088 using Spearman's rank correlations as implemented in *R*. For SNPs, we used  
1089 recombination rates from Comeron *et al.* (2012) and from the Recombination Rate  
1090 Calculator (Fiston-Lavier *et al.* 2010) in non-overlapping 100 kb windows, and assigned to  
1091 each TE insertion the recombination rate of the corresponding 100 kb genomic window.  
1092 To test for spatio-temporal variation of TE insertions, we excluded TEs with an interquartile  
1093 range (IQR) < 10. There were 141 TE insertions with variable population frequencies  
1094 among the *DrosEU* samples. We tested the population frequencies of these insertions for  
1095 correlations with latitude, longitude, altitude, and season using generalized linear models  
1096 (ANCOVA) following the method used for SNPs but with a binomial error structure in *R*.  
1097 We also tested for residual spatio-temporal autocorrelations, with Moran's *I* test (Moran  
1098 1950; Kühn & Dormann 2012). We used Bonferroni corrections to account for multiple  
1099 testing ( $\alpha' = 0.05/141 = 0.00035$ ) and only considered p-values < 0.001 to be significant.  
1100 TEs with a recombination rate that differed from 0 cM/Mb according to both used

1101 measures (see above) were considered as high recombination regions. To test TE family  
1102 enrichment among the significant TEs we performed a  $\chi^2$  test and applied Yate's correction  
1103 to account for the low number of some of the cells.

1104

### 1105 **Inversion polymorphisms**

1106 Since Pool-Seq data precludes a direct assessment of the presence and frequencies of  
1107 chromosomal inversions, we indirectly estimated inversion frequencies using a panel of  
1108 approximately 400 inversion-specific marker SNPs (Kapun *et al.* 2014) for six  
1109 cosmopolitan inversions (*In(2L)t*, *In(2R)NS*, *In(3L)P*, *In(3R)C*, *In(3R)Mo*, *In(3R)Payne*). We  
1110 averaged allele frequencies of these markers in each sample separately. To test for clinal  
1111 variation in the frequencies of inversions, we tested for correlations with latitude, longitude,  
1112 altitude and season using generalized linear models with a binomial error structure in *R* to  
1113 account for the biallelic nature of karyotype frequencies. In addition, we tested for residual  
1114 spatio-temporal autocorrelations as described above and Bonferroni-corrected the  $\alpha$   
1115 threshold ( $\alpha' = 0.05/7 = 0.007$ ) to account for multiple testing.

1116

### 1117 **Microbiome**

1118 Raw sequences were trimmed and quality filtered as described for the genomic data  
1119 analysis. The remaining high quality sequences were mapped against the *D. melanogaster*  
1120 genome (v.6.04) including mitochondria using bbmap (v. 35; Bushnell 2016) with standard  
1121 settings. The unmapped sequences were submitted to the online classification tool,  
1122 MGRAST (Meyer *et al.* 2008) for annotation. Taxonomy information was downloaded and  
1123 analyzed in *R* (v. 3.2.3; R Development Core Team 2009) using the matR (v. 0.9;  
1124 Braithwaite & Keegan) and RJSONIO (v. 1.3; Lang) packages. Metazoan sequence  
1125 features were removed. For microbial load comparisons, the number of protein features

1126 identified by MGRAST for each taxon and sample was divided by the number of  
1127 sequences that mapped to *D. melanogaster* chromosomes X, Y, 2L, 2R, 3L, 3R and 4.

1128

1129 We also surveyed the datasets for the presence of novel DNA viruses by performing *de*  
1130 *novo* assembly of the non-fly reads using SPAdes 3.9.0 (Bankevich *et al.* 2012), and using  
1131 conceptual translations to query virus proteins from Genbank using DIAMOND ‘blastp’  
1132 (Buchfink *et al.* 2015). In three cases (*Kallithea* virus, *Vesanto* virus, *Viltain* virus), reads  
1133 from a single sample pool were sufficient to assemble a (near) complete genome. In two  
1134 other cases, fragmentary assemblies allowed us to identify additional publicly available  
1135 datasets that contained sufficient reads to complete the genomes (*Linville Road* virus,  
1136 *Esparto* virus; completed using SRA datasets SRR2396966 and SRR3939042,  
1137 respectively). Novel viruses were provisionally named based on the localities where they  
1138 were first detected, and the corresponding novel genome sequences were submitted to  
1139 Genbank (KX130344, KY608910, KY457233, KX648533-KX648536). To assess the  
1140 relative amount of viral DNA, unmapped (non-fly) reads from each sample pool were  
1141 mapped to repeat-masked *Drosophila* DNA virus genomes using bowtie2, and coverage  
1142 normalized relative to virus genome length and the number of mapped *Drosophila* reads.

1143

## 1144 **Acknowledgments**

1145 We are grateful to all members of the *DrosEU* and Dros-RTEC consortia and to Dmitri  
1146 Petrov (Stanford) for support and discussion. *DrosEU* is funded by a Special Topic  
1147 Networks (STN) grant from the European Society for Evolutionary Biology (ESEB).  
1148 Computational analyses were partially executed at the Vital-IT bioinformatics facility of the  
1149 University of Lausanne (Switzerland) and at the computing facilities of the CC  
1150 LBBE/PRABI in Lyon (France).

1151

1152 **Additional information**

1153 **Funding**

| <b>Funder</b>                                                            | <b>Grant reference number</b>    | <b>Author</b>                   |
|--------------------------------------------------------------------------|----------------------------------|---------------------------------|
| University of Freiburg Research<br>Innovation Fund 2014                  |                                  | Fabian Staubach                 |
| Academy of Finland                                                       | #268241                          | Maaria Kankare                  |
| Academy of Finland                                                       | #272927                          | Maaria Kankare                  |
| Russian Foundation of Basic Research                                     | #15-54-46009 CT_a                | Elena G. Pasyukova              |
| Danish Natural Science Research<br>Council                               | 4002-00113                       | Volker Loeschcke                |
| Ministerio de Economía y<br>Competitividad                               | CTM2017-88080<br>(AEI/FEDER, UE) | Marta Pascual                   |
| CNRS                                                                     | UMR 9191                         | Catherine Montchamp-<br>Moreau  |
| Vetenskapsrådet                                                          | 2011-05679                       | Jessica Abbott                  |
| Vetenskapsrådet                                                          | 2015-04680                       | Jessica Abbott                  |
| Emmy Noether Programme of the<br>Deutsche Forschungsgemeinschaft,<br>DFG | PO 1648/3-1                      | Nico Posnien                    |
| National Institute of Health (NIH)                                       | R35GM119686                      | Alan O. Bergland                |
| Ministerio de Economía y<br>Competitividad                               | CGL2013-42432-P                  | Maria Pilar Garcia<br>Guerreiro |

|                                                                      |                           |                      |
|----------------------------------------------------------------------|---------------------------|----------------------|
| Scientific and Technological Research<br>Council of Turkey (TUBITAK) | #214Z238                  | Banu Sebnem Onder    |
| ANR Exhyb                                                            | 14-CE19-0016              | Cristina Vieira      |
| Network of Excellence LifeSpan                                       | FP6 036894                | Bas J. Zwaan         |
| IDEAL                                                                | FP7/2007-2011/259679      | Bas J. Zwaan         |
| Israel Science Foundation                                            | 1737/17                   | Eran Tauber          |
| National Institute of Health (NIH)                                   | R01GM100366               | Paul S. Schmidt      |
| Deutsche Forschungsgemeinschaft                                      | PA 903/8-1                | John Parsch          |
| Austrian Science Fund (FWF)                                          | P27048                    | Andrea J. Betancourt |
| Biotechnology and Biological Sciences<br>Research Council (BBSRC)    | BB/P00685X/1              | Andrea J. Betancourt |
| Swiss National Science Foundation<br>(SNSF)                          | PP00P3_133641             | Thomas Flatt         |
| Swiss National Science Foundation<br>(SNSF)                          | PP00P3_165836             | Thomas Flatt         |
| European Commission H2020-ERC-2014                                   | CoG-647900                | Josefa González      |
| Ministerio de Economía y<br>Competitividad                           | FEDER BFU2014-57779-<br>P | Josefa González      |

1154

1155

1156

1157

1158

1159

1160



1161 **Author contributions**

1162 Martin Kapun, Visualization, Writing-original draft preparation, Formal analysis,  
1163 Conceptualization, Writing-review & editing, Supervision, Methodology, Investigation, Data  
1164 curation, Project administration, Validation, Resources, Software; Maite G. Barrón,  
1165 Visualization, Writing-original draft preparation, Formal analysis, Conceptualization,  
1166 Writing-review & editing, Methodology, Investigation, Data curation, Project administration,  
1167 Validation, Resources, Software; Fabian Staubach, Visualization, Writing-original draft  
1168 preparation, Formal analysis, Conceptualization, Writing-review & editing, Supervision,  
1169 Funding acquisition, Methodology, Investigation, Data curation, Validation, Resources,  
1170 Software; Jorge Vieira, Visualization, Writing-original draft preparation, Formal analysis,  
1171 Conceptualization, Writing-review & editing, Methodology, Investigation, Validation,  
1172 Resources; Darren J. Obbard, Writing-original draft preparation, Formal analysis,  
1173 Conceptualization, Writing-review & editing, Methodology, Investigation, Validation,  
1174 Resources; Clément Goubert, Visualization, Writing-original draft preparation, Formal  
1175 analysis, Conceptualization, Writing-review & editing, Investigation, Resources; Omar  
1176 Rota-Stabelli, Visualization, Writing-original draft preparation, Formal analysis,  
1177 Conceptualization, Writing-review & editing, Methodology, Investigation, Resources;  
1178 Maaria Kankare, Writing-original draft preparation, Conceptualization, Writing-review &  
1179 editing, Methodology, Investigation, Resources; Annabelle Haudry, Writing-original draft  
1180 preparation, Formal analysis, Conceptualization, Writing-review & editing, Investigation,  
1181 Validation, Resources; R. Axel W. Wiberg, Writing-original draft preparation, Formal  
1182 analysis, Conceptualization, Writing-review & editing, Methodology, Investigation,  
1183 Resources, Software; Lena Waidele, Svitlana Serga, Patricia Gibert, Damiano Porcelli,  
1184 Sonja Grath, Eliza Argyridou, Lain Guio, Mads Fristrup Schou, Conceptualization, Writing-  
1185 review & editing, Investigation, Resources; Iryna Kozeretska, Conceptualization, Writing-

1186 review & editing, Methodology, Investigation, Resources; Elena G. Pasyukova, Marta  
1187 Pascual, Alan O. Bergland, Conceptualization, Writing-review & editing, Funding  
1188 acquisition, Methodology, Investigation, Resources; Volker Loeschcke, Catherine  
1189 Montchamp-Moreau, Jessica Abbott, Nico Posnien, Maria Pilar Garcia Guerreiro, Banu  
1190 Sebnem Onder, Conceptualization, Writing-review & editing, Funding acquisition,  
1191 Investigation, Resources; Cristina P. Vieira, Visualization, Formal analysis,  
1192 Conceptualization, Writing-review & editing, Investigation, Resources; Élio Sucena,  
1193 Conceptualization, Writing-review & editing, Methodology, Investigation, Project  
1194 administration, Resources; Cristina Vieira, Michael G. Ritchie, Thomas Flatt, Josefa  
1195 González, Writing-original draft preparation, Conceptualization, Writing-review & editing,  
1196 Supervision, Funding acquisition, Methodology, Investigation, Project administration,  
1197 Validation, Resources; Bart Deplancke, Conceptualization, Writing-review & editing,  
1198 Funding acquisition, Investigation; Bas J. Zwaan, Visualization, Writing-original draft  
1199 preparation, Conceptualization, Writing-review & editing, Supervision, Funding acquisition,  
1200 Methodology, Investigation, Project administration; Eran Tauber, Writing-original draft  
1201 preparation, Conceptualization, Writing-review & editing, Funding acquisition,  
1202 Methodology, Investigation, Resources; Dorcas J. Orengo, Eva Puerma,  
1203 Conceptualization, Writing-review & editing, Investigation, Validation, Resources;  
1204 Montserrat Agudé, Writing-original draft preparation, Conceptualization, Writing-review &  
1205 editing, Methodology, Investigation, Validation, Resources; Paul S. Schmidt, John Parsch,  
1206 Writing-original draft preparation, Conceptualization, Writing-review & editing, Funding  
1207 acquisition, Methodology, Investigation, Validation, Resources; Andrea J. Betancourt,  
1208 Writing-original draft preparation, Formal analysis, Conceptualization, Writing-review &  
1209 editing, Supervision, Funding acquisition, Methodology, Investigation, Project  
1210 administration, Validation, Resources

1211

1212 **Author ORCIDs**

| <b>Names</b>               | <b>ORCID</b>        |
|----------------------------|---------------------|
| Martin Kapun               | 0000-0002-3810-0504 |
| Maite G. Barrón            | 0000-0001-6146-6259 |
| Fabian Staubach            | 0000-0002-8097-2349 |
| Jorge Vieira               | 0000-0001-7032-5220 |
| Darren J. Obbard           | 0000-0001-5392-8142 |
| Clément Goubert            | 0000-0001-8034-5559 |
| Omar Rota-Stabelli         | 0000-0002-0030-7788 |
| Maaria Kankare             | 0000-0003-1541-9050 |
| Annabelle Haudry           | 0000-0001-6088-0909 |
| R. Axel W. Wiberg          | 0000-0002-8074-8670 |
| Lena Waidele               | 0000-0002-6323-6438 |
| Iryna Kozeretska           | 0000-0002-6485-1408 |
| Elena G. Pasyukova         | 0000-0002-6491-8561 |
| Volker Loeschcke           | 0000-0003-1450-0754 |
| Marta Pascual              | 0000-0002-6189-0612 |
| Cristina P. Vieira         | 0000-0002-7139-2107 |
| Svitlana Serga             | 0000-0003-1875-3185 |
| Catherine Montchamp-Moreau | 0000-0002-5044-9709 |
| Jessica Abbott             | 0000-0002-8743-2089 |
| Patricia Gibert            | 0000-0002-9461-6820 |
| Damiano Porcelli           | 0000-0002-9019-5758 |
| Nico Posnien               | 0000-0003-0700-5595 |

|                              |                     |
|------------------------------|---------------------|
| Sonja Grath                  | 0000-0003-3621-736X |
| Élio Sucena                  | 0000-0001-8810-870X |
| Alan O. Bergland             | 0000-0001-7145-7575 |
| Maria Pilar Garcia Guerreiro | 000-0001-9951-1879X |
| Banu Sebnem Onder            | 0000-0002-3003-248X |
| Eliza Argyridou              | 0000-0002-6890-4642 |
| Lain Guio                    | 0000-0002-5481-5200 |
| Mads Fristrup Schou          | 0000-0001-5521-5269 |
| Bart Deplancke               | 0000-0001-9935-843X |
| Cristina Vieira              | 0000-0003-3414-3993 |
| Michael G. Ritchie           | 0000-0001-7913-8675 |
| Bas J. Zwaan                 | 0000-0002-8221-4998 |
| Eran Tauber                  | 0000-0003-4018-6535 |
| Dorcas J. Orengo             | 0000-0001-7911-3224 |
| Eva Puerma                   | 0000-0001-7261-187X |
| Montserrat Agudé             | 0000-0002-3884-7800 |
| Paul S. Schmidt              | 0000-0002-8076-6705 |
| John Parsch                  | 0000-0001-9068-5549 |
| Andrea J. Betancourt         | 0000-0001-9351-1413 |
| Thomas Flatt                 | 0000-0002-5990-1503 |
| Josefa González              | 0000-0001-9824-027X |

1213

1214

1215

1216

## 1217 **References**

- 1218 Adrian AB, Comeron JM (2013) The *Drosophila* early ovarian transcriptome provides  
1219 insight to the molecular causes of recombination rate variation across genomes. *BMC*  
1220 *Genomics*, **14**, 794.
- 1221 Adrion JR, Hahn MW, Cooper BS (2015) Revisiting classic clines in *Drosophila*  
1222 *melanogaster* in the age of genomics. *Trends in Genetics*, **31**, 434–444.
- 1223 Alonso-Blanco C, Andrade J, Becker C *et al.* (2016) 1,135 Genomes Reveal the Global  
1224 Pattern of Polymorphism in *Arabidopsis thaliana*. **166**, 481–491.
- 1225 Anderson WW, Arnold J, Baldwin DG *et al.* (1991) Four decades of inversion  
1226 polymorphism in *Drosophila pseudoobscura*. *Proceedings of the National Academy of*  
1227 *Sciences of the United States of America*, **88**, 10367–10371.
- 1228 Andolfatto P (2001) Contrasting Patterns of X-Linked and Autosomal Nucleotide Variation  
1229 in *Drosophila melanogaster* and *Drosophila simulans*. *Molecular Biology and Evolution*,  
1230 **18**, 279–290.
- 1231 Aulard S, David JR, Lemeunier F (2002) Chromosomal inversion polymorphism in  
1232 Afrotropical populations of *Drosophila melanogaster*. *Genetic Research*, **79**, 49–63.
- 1233 Bankevich A, Nurk S, Antipov D *et al.* (2012) *SPAdes, a New Genome Assembly*  
1234 *Algorithm and Its Applications to Single-cell Sequencing (7th Annual SFAF Meeting,*  
1235 *2012)*. Mary Ann Liebert, Inc. 140 Huguenot Street, 3rd Floor New Rochelle, NY  
1236 10801 USA.
- 1237 Barata A, Santos SC, Malfeito-Ferreira M, Loureiro V (2012) New insights into the  
1238 ecological interaction between grape berry microorganisms and *Drosophila* flies during  
1239 the development of sour rot. *Microbial ecology*, **64**, 416–430.

- 1240 Bartolomé C, Maside X, Charlesworth B (2002) On the Abundance and Distribution of  
1241 Transposable Elements in the Genome of *Drosophila melanogaster*. *Molecular Biology*  
1242 *and Evolution*, **19**, 926–937.
- 1243 Bastide H, Betancourt A, Nolte V *et al.* (2013) A genome-wide, fine-scale map of natural  
1244 pigmentation variation in *Drosophila melanogaster*. (P Wittkopp, Ed.). *PLoS Genetics*,  
1245 **9**, e1003534.
- 1246 Baudry E, Viginier B, Veuille M (2004) Non-African populations of *Drosophila*  
1247 *melanogaster* have a unique origin. *Molecular Biology and Evolution*, **21**, 1482–1491.
- 1248 Becher PG, Flick G, Rozpędowska E *et al.* (2012) Yeast, not fruit volatiles mediate  
1249 *Drosophila melanogaster* attraction, oviposition and development. *Functional Ecology*,  
1250 **26**, 822–828.
- 1251 Begun DJ, Aquadro CF (1992) Levels of naturally occurring DNA polymorphism correlate  
1252 with recombination rates in *D. melanogaster*. *Nature*, **356**, 519–520.
- 1253 Begun DJ, Aquadro CF (1993) African and North American populations of *Drosophila*  
1254 *melanogaster* are very different at the DNA level. *Nature*, **365**, 548–550.
- 1255 Begun DJ, Holloway AK, Stevens K *et al.* (2007) Population Genomics: Whole-Genome  
1256 Analysis of Polymorphism and Divergence in *Drosophila simulans*. *PLoS Biology*, **5**,  
1257 e310.
- 1258 Behrman EL, Howick VM, Kapun M *et al.* (2018) Rapid seasonal evolution in innate  
1259 immunity of wild *Drosophila melanogaster*. *Proceedings of the Royal Society B:*  
1260 *Biological Sciences*, **285**, 20172599.
- 1261 Beisswanger S, Stephan W, De Lorenzo D (2006) Evidence for a Selective Sweep in the  
1262 *wapl* Region of *Drosophila melanogaster*. *Genetics*, **172**, 265–274.

- 1263 Bergland AO, Behrman EL, O'Brien KR, Schmidt PS, Petrov DA (2014) Genomic Evidence  
1264 of Rapid and Stable Adaptive Oscillations over Seasonal Time Scales in *Drosophila*.  
1265 *PLoS Genetics*, **10**, e1004775.
- 1266 Bergland AO, Tobler R, González J, Schmidt P, Petrov D (2016) Secondary contact and  
1267 local adaptation contribute to genome-wide patterns of clinal variation in *Drosophila*  
1268 *melanogaster*. *Molecular Ecology*, **25**, 1157–1174.
- 1269 Betancourt AJ, Kim Y, Orr HA (2004) A pseudohitchhiking model of X vs. autosomal  
1270 diversity. *Genetics*, **168**, 2261–2269.
- 1271 Betancourt AJ, Welch JJ, Charlesworth B (2009) Reduced effectiveness of selection  
1272 caused by a lack of recombination. *Current biology*, **19**, 655–660.
- 1273 Bivand R, Piras G (2015) Comparing Implementations of Estimation Methods for Spatial  
1274 Econometrics. *Journal of Statistical Software*, **63**, 1–36.
- 1275 Black WC IV, Black WC IV, Baer CF, Antolin MF, DuTeau NM (2001) Population  
1276 genomics: genome-wide sampling of insect populations. *Annual Review of*  
1277 *Entomology*.
- 1278 Blumenstiel JP, Chen X, He M, Bergman CM (2014) An Age-of-Allele Test of Neutrality for  
1279 Transposable Element Insertions. *Genetics*, **196**, 523–538.
- 1280 Boitard S, Schlötterer C, Nolte V, Pandey RV, Futschik A (2012) Detecting Selective  
1281 Sweeps from Pooled Next-Generation Sequencing Samples. *Molecular Biology and*  
1282 *Evolution*, **29**, 2177–2186.
- 1283 Bolger AM, Lohse M, Usadel B (2014) Trimmomatic: a flexible trimmer for Illumina  
1284 sequence data. *Bioinformatics*, **30**, 2114–2120.
- 1285 Boussy IA, Itoh M, Rand D, Woodruff RC (1998) Origin and decay of the P element-  
1286 associated latitudinal cline in Australian *Drosophila melanogaster*. *Genetica*, **104**, 45–  
1287 57.

- 1288 Božičević V, Hutter S, Stephan W, Wollstein A (2016) Population genetic evidence for cold  
1289 adaptation in European *Drosophila melanogaster* populations. *Molecular Ecology*, **25**,  
1290 1175–1191.
- 1291 Braithwaite DP, Keegan KP *matR: Metagenomics Analysis Tools for R*. [https://CRAN.R-](https://CRAN.R-project.org/package=matR)  
1292 [project.org/package=matR](https://CRAN.R-project.org/package=matR).
- 1293 Buchfink B, Xie C, Huson DH (2015) Fast and sensitive protein alignment using  
1294 DIAMOND. *Nature Methods*, **12**, 59–60.
- 1295 Buser CC, Newcomb RD, Gaskett AC, Goddard MR (2014) Niche construction initiates the  
1296 evolution of mutualistic interactions. *Ecology Letters*, **17**, 1257–1264.
- 1297 Bushnell B (2016) *BBMap short read aligner*. URL <http://sourceforge.net/projects/bbmap>.
- 1298 Camus MF, Wolff JN, Sgrò CM, Dowling DK (2017) Experimental Support That Natural  
1299 Selection Has Shaped the Latitudinal Distribution of Mitochondrial Haplotypes in  
1300 Australian *Drosophila melanogaster*. *Molecular Biology and Evolution*, **34**, 2600–2612.
- 1301 Caracristi G, Schlötterer C (2003) Genetic Differentiation Between American and  
1302 European *Drosophila melanogaster* Populations Could Be Attributed to Admixture of  
1303 African Alleles. *Molecular Biology and Evolution*, **20**, 792–799.
- 1304 Casillas S, Barbadilla A (2017) Molecular Population Genetics. *Genetics*, **205**, 1003–1035.
- 1305 Catania F, Kauer MO, Daborn PJ *et al.* (2004) World-wide survey of an Accord insertion  
1306 and its association with DDT resistance in *Drosophila melanogaster*. *Molecular*  
1307 *Ecology*, **13**, 2491–2504.
- 1308 Cavalli-Sforza LL (1966) Population Structure and Human Evolution. *Proceedings of the*  
1309 *Royal Society of London. Series B: Biological Sciences*, **164**, 362–379.
- 1310 Chandler JA, James PM (2013) Discovery of trypanosomatid parasites in globally  
1311 distributed *Drosophila* species. *PLoS ONE*, **8**, e61937.



- 1312 Chandler JA, Eisen JA, Kopp A (2012) Yeast communities of diverse *Drosophila* species:  
1313 comparison of two symbiont groups in the same hosts. *Applied and Environmental*  
1314 *Microbiology*, **78**, 7327–7336.
- 1315 Chandler JA, Lang JM, Bhatnagar S, Eisen JA, Kopp A (2011) Bacterial communities of  
1316 diverse *Drosophila* species: ecological context of a host-microbe model system. *PLoS*  
1317 *Genetics*, **7**, e1002272.
- 1318 Charlesworth B (2010) Molecular population genomics: a short history. *Genetical*  
1319 *Research*, **92**, 397–411.
- 1320 Charlesworth B (2015) Causes of natural variation in fitness: evidence from studies of  
1321 *Drosophila* populations. *Proceedings of the National Academy of Sciences of the*  
1322 *United States of America*, **112**, 1662–1669.
- 1323 Charlesworth B, Sniegowski P, Stephan W (1994) The evolutionary dynamics of repetitive  
1324 DNA in eukaryotes. *Nature*, **371**, 215–220.
- 1325 Cheng C, White BJ, Kamdem C *et al.* (2012) Ecological genomics of *Anopheles gambiae*  
1326 along a latitudinal cline: a population-resequencing approach. *Genetics*, **190**, 1417–  
1327 1432.
- 1328 Cingolani P, Platts A, Wang LL *et al.* (2012) A program for annotating and predicting the  
1329 effects of single nucleotide polymorphisms, SnpEff: SNPs in the genome of *Drosophila*  
1330 *melanogaster* strain w1118; *iso-2*; *iso-3*. *Fly (Austin)*, **6**, 80–92.
- 1331 Clement M, Posada D, Crandall KA (2000) TCS: a computer program to estimate gene  
1332 genealogies. *Molecular Ecology*, **9**, 1657–1659.
- 1333 Clemente F, Vogl C (2012) Unconstrained evolution in short introns? – An analysis of  
1334 genome-wide polymorphism and divergence data from *Drosophila*. *Journal of*  
1335 *Evolutionary Biology*, **25**, 1975–1990.

- 1336 Comeron JM, Ratnappan R, Bailin S (2012) The many landscapes of recombination in  
1337 *Drosophila melanogaster*. (DA Petrov, Ed.). *PLoS Genetics*, **8**, e1002905.
- 1338 Consortium T (2015) A global reference for human genetic variation. **526**, 68–74.
- 1339 Cooper BS, Burrus CR, Ji C, Hahn MW, Montooth KL (2015) Similar Efficacies of  
1340 Selection Shape Mitochondrial and Nuclear Genes in Both *Drosophila melanogaster*  
1341 and *Homo sapiens*. *G3 (Bethesda, Md.)*, **5**, 2165–2176.
- 1342 Corbett-Detig RB, Hartl DL (2012) Population Genomics of Inversion Polymorphisms in  
1343 *Drosophila melanogaster*. *PLoS Genetics*, **8**, e1003056.
- 1344 Cridland JM, Macdonald SJ, Long AD, Thornton KR (2013) Abundance and distribution of  
1345 transposable elements in two *Drosophila* QTL mapping resources. *Molecular Biology*  
1346 *and Evolution*, **30**, 2311–2327.
- 1347 Daborn PJ, Yen JL, Bogwitz MR *et al.* (2002) A single p450 allele associated with  
1348 insecticide resistance in *Drosophila*. *Science*, **297**, 2253–2256.
- 1349 David JR, Capy P (1988) Genetic variation of *Drosophila melanogaster* natural  
1350 populations. *Trends in genetics : TIG*, **4**, 106–111.
- 1351 de Jong G, Bochdanovits Z (2003) Latitudinal clines in *Drosophila melanogaster*: body  
1352 size, allozyme frequencies, inversion frequencies, and the insulin-signalling pathway.  
1353 *Journal of Genetics*, **82**, 207–223.
- 1354 Dieringer D, Nolte V, Schlötterer C (2005) Population structure in African *Drosophila*  
1355 *melanogaster* revealed by microsatellite analysis. *Molecular Ecology*, **14**, 563–573.
- 1356 Dobzhansky T (1970) *Genetics of the Evolutionary Process*. Columbia University Press.
- 1357 Dray S, Dufour A-B (2007) The ade4 Package: Implementing the Duality Diagram for  
1358 Ecologists. *Journal of Statistical Software*, **22**.

- 1359 Duchen P, Zivkovic D, Hutter S, Stephan W, Laurent S (2013) Demographic inference  
1360 reveals African and European admixture in the North American *Drosophila*  
1361 *melanogaster* population. *Genetics*, **193**, 291–301.
- 1362 Ellegren H (2014) Genome sequencing and population genomics in non-model organisms.  
1363 *Trends in Ecology & Evolution*, **29**, 51–63.
- 1364 Endler JA (1977) *Geographic Variation, Speciation, and Clines*. Princeton University  
1365 Press.
- 1366 Fabian DK, Kapun M, Nolte V *et al.* (2012) Genome-wide patterns of latitudinal  
1367 differentiation among populations of *Drosophila melanogaster* from North America.  
1368 *Molecular Ecology*, **21**, 4748–4769.
- 1369 Fabian DK, Lack JB, Mathur V *et al.* (2015) Spatially varying selection shapes life history  
1370 clines among populations of *Drosophila melanogaster* from sub-Saharan Africa.  
1371 *Journal of Evolutionary Biology*, **28**, 826–840.
- 1372 Fiston-Lavier A-S, Barrón MG, Petrov DA, González J (2015) T-lex2: genotyping,  
1373 frequency estimation and re-annotation of transposable elements using single or  
1374 pooled next-generation sequencing data. *Nucleic Acids Research*, **43**, e22–e22.
- 1375 Fiston-Lavier A-S, Singh ND, Lipatov M, Petrov DA (2010) *Drosophila melanogaster*  
1376 recombination rate calculator. *Gene*, **463**, 18–20.
- 1377 Flatt T, Amdam GV, Kirkwood TBL, Omholt SW (2013) Life-history evolution and the  
1378 polyphenic regulation of somatic maintenance and survival. *The quarterly review of*  
1379 *biology*, **88**, 185–218.
- 1380 Fraley C, Raftery AE (2012) *mclust Version 4 for R: Normal Mixture Modeling for Model-*  
1381 *Based Clustering, Classification, and Density Estimation*. Seattle.
- 1382 Francalacci P, Sanna D (2008) History and geography of human Y-chromosome in  
1383 Europe: a SNP perspective. *Journal of anthropological sciences*, **86**, 59–89.

- 1384 Frichot E, Schoville SD, Bouchard G, François O (2013) Testing for associations between  
1385 loci and environmental gradients using latent factor mixed models. *Molecular Biology*  
1386 *and Evolution*, **30**, 1687–1699.
- 1387 Futschik A (2010) The next generation of molecular markers from massively parallel  
1388 sequencing of pooled DNA samples. *Genetics*, **186**, 207–218.
- 1389 González J, Karasov TL, Messer PW, Petrov DA (2010) Genome-Wide Patterns of  
1390 Adaptation to Temperate Environments Associated with Transposable Elements in  
1391 *Drosophila* (HS Malik, Ed.). *PLoS Genetics*, **6**, e1000905.
- 1392 González J, Lenkov K, Lipatov M, Macpherson JM, Petrov DA (2008) High Rate of Recent  
1393 Transposable Element–Induced Adaptation in *Drosophila melanogaster*. *PLoS Biology*,  
1394 **6**, e251.
- 1395 Goubert C, Modolo L, Vieira C *et al.* (2015) De Novo Assembly and Annotation of the  
1396 Asian Tiger Mosquito (*Aedes albopictus*) Repeatome with dnaPipeTE from Raw  
1397 Genomic Reads and Comparative Analysis with the Yellow Fever Mosquito (*Aedes*  
1398 *aegypti*). *Genome Biology and Evolution*, **7**, 1192–1205.
- 1399 Grabherr MG, Haas BJ, Yassour M *et al.* (2011) Full-length transcriptome assembly from  
1400 RNA-Seq data without a reference genome. *Nature Biotechnology*, **29**, 644–652.
- 1401 Gramates LS, Marygold SJ, Santos GD *et al.* (2017) FlyBase at 25: looking to the future.  
1402 *Nucleic Acids Research*, **45**, D663–D671.
- 1403 Green RM, Smart WM (1985) *Textbook on Spherical Astronomy*. Cambridge University.
- 1404 Grenier JK, Arguello JR, Moreira MC *et al.* (2015) Global Diversity Lines-A Five-Continent  
1405 Reference Panel of Sequenced *Drosophila melanogaster* Strains. *G3 (Bethesda, Md.)*,  
1406 **5**, 593–603.

- 1407 Haddrill PR, Charlesworth B, Halligan DL, Andolfatto P (2005) Patterns of intron sequence  
1408 evolution in *Drosophila* are dependent upon length and GC content. *Genome Biology*,  
1409 **6**, R67.
- 1410 Hales KG, Korey CA, Larracuente AM, Roberts DM (2015) Genetics on the Fly: A Primer  
1411 on the *Drosophila* Model System. *Genetics*, **201**, 815–842.
- 1412 Hamilton PT, Votýpka J, Dostálová A *et al.* (2015) Infection Dynamics and Immune  
1413 Response in a Newly Described *Drosophila*-Trypanosomatid Association. *mBio*, **6**,  
1414 e01356–15.
- 1415 Handu M, Kaduskar B, Ravindranathan R *et al.* (2015) SUMO-Enriched Proteome for  
1416 *Drosophila* Innate Immune Response. *G3 (Bethesda, Md.)*, **5**, 2137–2154.
- 1417 Harpur BA, Kent CF, Molodtsova D *et al.* (2014) Population genomics of the honey bee  
1418 reveals strong signatures of positive selection on worker traits. *Proceedings of the*  
1419 *National Academy of Sciences of the United States of America*, **111**, 2614–2619.
- 1420 Haselkorn TS, Markow TA, Moran NA (2009) Multiple introductions of the *Spiroplasma*  
1421 bacterial endosymbiont into *Drosophila*. *Molecular Ecology*, **18**, 1294–1305.
- 1422 Hohenlohe PA, Bassham S, Etter PD *et al.* (2010) Population Genomics of Parallel  
1423 Adaptation in Threespine Stickleback using Sequenced RAD Tags. *PLoS Genetics*, **6**,  
1424 e1000862.
- 1425 Hu TT, Eisen MB, Thornton KR, Andolfatto P (2013) A second-generation assembly of the  
1426 *Drosophila simulans* genome provides new insights into patterns of lineage-specific  
1427 divergence. *Genome Research*, **23**, 89–98.
- 1428 Huang W, Massouras A, Inoue Y *et al.* (2014) Natural variation in genome architecture  
1429 among 205 *Drosophila melanogaster* Genetic Reference Panel lines. *Genome*  
1430 *Research*, **24**, 1193–1208.

- 1431 Hudson RR, Kreitman M, Aguadé M (1987) A test of neutral molecular evolution based on  
1432 nucleotide data. *Genetics*, **116**, 153–159.
- 1433 Huszar T, Imler J-L (2008) *Drosophila* viruses and the study of antiviral host-defense.  
1434 *Advances in virus research*, **72**, 227–265.
- 1435 Hutter S, Li H, Beisswanger S, De Lorenzo D, Stephan W (2007) Distinctly Different Sex  
1436 Ratios in African and European Populations of *Drosophila melanogaster* Inferred From  
1437 Chromosomewide Single Nucleotide Polymorphism Data. *Genetics*, **177**, 469–480.
- 1438 Jorde LB, Watkins WS, Bamshad MJ (2001) Population genomics: a bridge from  
1439 evolutionary history to genetic medicine. *Human Molecular Genetics*, **10**, 2199–2207.
- 1440 Kao JY, Zubair A, Salomon MP, Nuzhdin SV, Campo D (2015) Population genomic  
1441 analysis uncovers African and European admixture in *Drosophila melanogaster*  
1442 populations from the south-eastern United States and Caribbean Islands. *Molecular*  
1443 *Ecology*, **24**, 1499–1509.
- 1444 Kapitonov VV, Jurka J (2003) Molecular Paleontology of Transposable Elements in the  
1445 *Drosophila melanogaster* Genome. *Proceedings of the National Academy of Sciences*  
1446 *of the United States of America*, **100**, 6569–6574.
- 1447 Kapun M, Fabian DK, Goudet J, Flatt T (2016a) Genomic Evidence for Adaptive Inversion  
1448 Clines in *Drosophila melanogaster*. *Molecular Biology and Evolution*, **33**, 1317–1336.
- 1449 Kapun M, Schmidt C, Durmaz E, Schmidt PS, Flatt T (2016b) Parallel effects of the  
1450 inversion *In(3R)Payne* on body size across the North American and Australian clines in  
1451 *Drosophila melanogaster*. *Journal of Evolutionary Biology*, **29**, 1059–1072.
- 1452 Kapun M, van Schalkwyk H, McAllister B, Flatt T, Schlötterer C (2014) Inference of  
1453 chromosomal inversion dynamics from Pool-Seq data in natural and laboratory  
1454 populations of *Drosophila melanogaster*. *Molecular Ecology*, **23**, 1813–1827.

- 1455 Kassis JA, Kennison JA, Tamkun JW (2017) Polycomb and Trithorax Group Genes in  
1456 *Drosophila*. *Genetics*, **206**, 1699–1725.
- 1457 Kauer M, Zangerl B, Dieringer D, Schlötterer C (2002) Chromosomal patterns of  
1458 microsatellite variability contrast sharply in African and non-African populations of  
1459 *Drosophila melanogaster*. *Genetics*, **160**, 247–256.
- 1460 Keller A (2007) *Drosophila melanogaster's* history as a human commensal. *Current*  
1461 *Biology*, **17**, R77–R81.
- 1462 Kimura M (1984) *The Neutral Theory of Molecular Evolution*. Cambridge University Press.
- 1463 Knibb WR (1982) Chromosome inversion polymorphisms in *Drosophila melanogaster* II.  
1464 Geographic clines and climatic associations in Australasia, North America and Asia.  
1465 *Genetica*, **58**, 213–221.
- 1466 Knibb WR (1986) Temporal variation of *Drosophila melanogaster* *Adh* allele frequencies,  
1467 inversion frequencies, and population sizes. *Genetica*, **71**, 175–190.
- 1468 Knibb WR, Oakeshott JG, Gibson JB (1981) Chromosome Inversion Polymorphisms in  
1469 *Drosophila melanogaster*. I. Latitudinal Clines and Associations between Inversions in  
1470 Australasian Populations. *Genetics*, **98**, 833–847.
- 1471 Kofler R, Betancourt AJ, Schlötterer C (2012) Sequencing of pooled DNA samples (Pool-  
1472 Seq) uncovers complex dynamics of transposable element insertions in *Drosophila*  
1473 *melanogaster*. *PLoS Genetics*, **8**, e1002487.
- 1474 Kofler R, Orozco-terWengel P, De Maio N *et al.* (2011) PoPoolation: A Toolbox for  
1475 Population Genetic Analysis of Next Generation Sequencing Data from Pooled  
1476 Individuals. *PLoS ONE*, **6**, e15925.
- 1477 Kolaczkowski B, Hupalo DN, Kern AD (2011a) Recurrent adaptation in RNA interference  
1478 genes across the *Drosophila* phylogeny. *Molecular Biology and Evolution*, **28**, 1033–  
1479 1042.



- 1480 Kolaczowski B, Kern AD, Holloway AK, Begun DJ (2011b) Genomic Differentiation  
1481 Between Temperate and Tropical Australian Populations of *Drosophila melanogaster*.  
1482 *Genetics*, **187**, 245–260.
- 1483 Korneliussen TS, Moltke I, Albrechtsen A, Nielsen R (2013) Calculation of Tajima's *D* and  
1484 other neutrality test statistics from low depth next-generation sequencing data. *BMC*  
1485 *Bioinformatics*, **14**, 289.
- 1486 Kreitman M (1983) Nucleotide polymorphism at the alcohol dehydrogenase locus of  
1487 *Drosophila melanogaster*. *Nature*, **304**, 412–417.
- 1488 Kriesner P, Conner WR, Weeks AR, Turelli M, Hoffmann AA (2016) Persistence of a  
1489 *Wolbachia* infection frequency cline in *Drosophila melanogaster* and the possible role  
1490 of reproductive dormancy. *Evolution*, **70**, 979–997.
- 1491 Kühn I, Dormann CF (2012) Less than eight (and a half) misconceptions of spatial  
1492 analysis. *Journal of Biogeography*, **39**, 995–998.
- 1493 Lachaise D, Cariou M-L, David JR *et al.* (1988) Historical Biogeography of the *Drosophila*  
1494 *melanogaster* Species Subgroup. In: *Evolutionary Biology*, pp. 159–225. Springer,  
1495 Boston, MA, Boston, MA.
- 1496 Lack JB, Cardeno CM, Crepeau MW *et al.* (2015) The *Drosophila* genome nexus: a  
1497 population genomic resource of 623 *Drosophila melanogaster* genomes, including 197  
1498 from a single ancestral range population. *Genetics*, **199**, 1229–1241.
- 1499 Lack JB, Lange JD, Tang AD, Corbett-Detig RB, Pool JE (2016) A Thousand Fly  
1500 Genomes: An Expanded *Drosophila* Genome Nexus. *Molecular Biology and Evolution*,  
1501 **33**, msw195–3313.
- 1502 Lang DT *RJSONIO: Serialize R objects to JSON, JavaScript Object Notation*.  
1503 <https://CRAN.R-project.org/package=RJSONIO>.



- 1504 Langley CH, Stevens K, Cardeno C *et al.* (2012) Genomic variation in natural populations  
1505 of *Drosophila melanogaster*. *Genetics*, **192**, 533–598.
- 1506 Langmead B, Salzberg SL (2012) Fast gapped-read alignment with Bowtie 2. *Nature*  
1507 *Methods*, **9**, 357–359.
- 1508 Lawrie DS, Messer PW, Hershberg R, Petrov DA (2013) Strong Purifying Selection at  
1509 Synonymous Sites in *D. melanogaster*. *arXiv.org*, **q-bio.PE**, e1003527.
- 1510 Levins R (1968) *Evolution in Changing Environments*. Princeton University Press.
- 1511 Lewontin RC (1974) *The Genetic Basis of Evolutionary Change*. Columbia University  
1512 Press.
- 1513 Li H (2013) Aligning sequence reads, clone sequences and assembly contigs with BWA-  
1514 MEM. *arXiv.org*.
- 1515 Li H, Durbin R (2009) Fast and accurate short read alignment with Burrows-Wheeler  
1516 transform. *Bioinformatics*, **25**, 1754–1760.
- 1517 Li H, Ruan J, Durbin R (2008) Mapping short DNA sequencing reads and calling variants  
1518 using mapping quality scores. *Genome Research*, **18**, 1851–1858.
- 1519 Luikart G, England PR, Tallmon D, Jordan S, Tableret P (2003) The power and promise of  
1520 population genomics: from genotyping to genome typing. *Nature Reviews Genetics*, **4**,  
1521 981–994.
- 1522 Lyne R, Smith R, Rutherford K *et al.* (2007) FlyMine: an integrated database for  
1523 *Drosophila* and *Anopheles* genomics. *Genome Biology*, **8**, R129.
- 1524 Machado HE, Bergland AO, O'Brien KR *et al.* (2016) Comparative population genomics of  
1525 latitudinal variation in *Drosophila simulans* and *Drosophila melanogaster*. *Molecular*  
1526 *Ecology*, **25**, 723–740.
- 1527 Mackay TFC, Richards S, Stone EA *et al.* (2012) The *Drosophila melanogaster* Genetic  
1528 Reference Panel. *Nature*, **482**, 173–178.

- 1529 Martin M (2011) Cutadapt removes adapter sequences from high-throughput sequencing  
1530 reads. *EMBnet.journal*, **17**, 10–12.
- 1531 Martino ME, Ma D, Leulier F (2017) Microbial influence on *Drosophila* biology. *Current*  
1532 *Opinion in Microbiology*, **38**, 165–170.
- 1533 Mateo L, Rech GE, González J (2018) Genome-wide patterns of local adaptation in  
1534 *Drosophila melanogaster*: adding intra European variability to the map. *bioRxiv*. DOI:  
1535 10.1101/269332
- 1536 Matthias P, Yoshida M, Khochbin S (2008) HDAC6 a new cellular stress surveillance  
1537 factor. *Cell Cycle*, **7**, 7–10.
- 1538 McDonald JH, Kreitman M (1991) Adaptive protein evolution at the Adh locus in  
1539 *Drosophila*. *Nature*, **351**, 652–654.
- 1540 McKenna A, Hanna M, Banks E *et al.* (2010) The Genome Analysis Toolkit: A MapReduce  
1541 framework for analyzing next-generation DNA sequencing data. *Genome Research*,  
1542 **20**, 1297–1303.
- 1543 Menozzi P, Piazza A, Cavalli-Sforza L (1978) Synthetic maps of human gene frequencies  
1544 in Europeans. *Science*, **201**, 786–792.
- 1545 Messer PW, Petrov DA (2013) Population genomics of rapid adaptation by soft selective  
1546 sweeps. **28**, 659–669.
- 1547 Mettler LE, Voelker RA, Mukai T (1977) Inversion Clines in Populations of *Drosophila*  
1548 *melanogaster*. *Genetics*, **87**, 169–176.
- 1549 Meyer F, Paarmann D, D'Souza M *et al.* (2008) The metagenomics RAST server - a public  
1550 resource for the automatic phylogenetic and functional analysis of metagenomes. *BMC*  
1551 *Bioinformatics*, **9**, 386.
- 1552 Micallef L, Rodgers P (2014) eulerAPE: drawing area-proportional 3-Venn diagrams using  
1553 ellipses. *PLoS ONE*, **9**, e101717.

- 1554 Michalakis Y, Veuille M (1996) Length variation of CAG/CAA trinucleotide repeats in  
1555 natural populations of *Drosophila melanogaster* and its relation to the recombination  
1556 rate. *Genetics*, **143**, 1713–1725.
- 1557 Moran PAP (1950) Notes on Continuous Stochastic Phenomena. *Biometrika*, **37**, 17.
- 1558 Nei M (1987) *Molecular Evolutionary Genetics*. Columbia University Press.
- 1559 Nolte V, Pandey RV, Kofler R, Schlötterer C (2013) Genome-wide patterns of natural  
1560 variation reveal strong selective sweeps and ongoing genomic conflict in *Drosophila*  
1561 *mauritiana*. *Genome Research*, **23**, 99–110.
- 1562 Novembre J, Stephens M (2008) Interpreting principal component analyses of spatial  
1563 population genetic variation. *Nature Genetics*, **40**, 646–649.
- 1564 Nunes MDS, Neumeier H, Schlötterer C (2008) Contrasting patterns of natural variation in  
1565 global *Drosophila melanogaster* populations. *Molecular Ecology*, **17**, 4470–4479.
- 1566 Okonechnikov K, Conesa A, García-Alcalde F (2016) Qualimap 2: advanced multi-sample  
1567 quality control for high-throughput sequencing data. *Bioinformatics*, **32**, 292–294.
- 1568 Parsch J, Novozhilov S, Saminadin-Peter SS, Wong KM, Andolfatto P (2010) On the utility  
1569 of short intron sequences as a reference for the detection of positive and negative  
1570 selection in *Drosophila*. *Molecular Biology and Evolution*, **27**, 1226–1234.
- 1571 Peel MC, Finlayson BL, McMahon TA (2007) Updated world map of the Köppen-Geiger  
1572 climate classification. *Hydrology and Earth System Sciences*, **11**, 1633–1644.
- 1573 Petrov DA, Fiston-Lavier AS, Lipatov M, Lenkov K, González J (2011) Population  
1574 Genomics of Transposable Elements in *Drosophila melanogaster*. *Molecular Biology*  
1575 *and Evolution*, **28**, 1633–1644.
- 1576 Pool JE (2015) The Mosaic Ancestry of the *Drosophila* Genetic Reference Panel and the  
1577 *D. melanogaster* Reference Genome Reveals a Network of Epistatic Fitness  
1578 Interactions. *Molecular Biology and Evolution*, **32**, 3236–3251.

- 1579 Pool JE, Nielsen R (2007) Population size changes reshape genomic patterns of diversity.  
1580 *Evolution*, **61**, 3001–3006.
- 1581 Pool JE, Braun DT, Lack JB (2016) Parallel Evolution of Cold Tolerance Within *Drosophila*  
1582 *melanogaster*. *Molecular Biology and Evolution*, msw232.
- 1583 Pool JE, Corbett-Detig RB, Sugino RP *et al.* (2012) Population Genomics of Sub-Saharan  
1584 *Drosophila melanogaster*: African Diversity and Non-African Admixture. *PLoS*  
1585 *Genetics*, **8**, e1003080.
- 1586 Powell JR (1997) *Progress and Prospects in Evolutionary Biology: The Drosophila Model*.  
1587 Oxford University Press.
- 1588 R Development Core Team (2009) R: A Language and Environment for Statistical  
1589 Computing. *R-project.org*.
- 1590 Rako L, Anderson AR, Sgrò CM, Stocker AJ, Hoffmann AA (2006) The association  
1591 between inversion *In(3R)Payne* and clinally varying traits in *Drosophila melanogaster*.  
1592 *Genetica*, **128**, 373–384.
- 1593 Ramachandran S, Rosenberg NA, Zhivotovsky LA, Feldman MW (2004) Robustness of  
1594 the inference of human population structure: a comparison of X-chromosomal and  
1595 autosomal microsatellites. *Human genomics*, **1**, 87–97.
- 1596 Rane RV, Rako L, Kapun M, LEE SF (2015) Genomic evidence for role of inversion *3RP*  
1597 of *Drosophila melanogaster* in facilitating climate change adaptation. *Molecular*  
1598 *Ecology*, **24**, 2423–2432.
- 1599 Reinhardt JA, Kolaczowski B, Jones CD, Begun DJ, Kern AD (2014) Parallel Geographic  
1600 Variation in *Drosophila melanogaster*. *Genetics*, **197**, 361–373.
- 1601 Richardson JL, Urban MC, Bolnick DI, Skelly DK (2014) Microgeographic adaptation and  
1602 the spatial scale of evolution. *Trends in Ecology & Evolution*, **29**, 165–176.

- 1603 Richardson MF, Weinert LA, Welch JJ *et al.* (2012) Population Genomics of the *Wolbachia*  
1604 Endosymbiont in *Drosophila melanogaster* (A Kopp, Ed.). *PLoS Genetics*, **8**,  
1605 e1003129.
- 1606 Rogers RL, Hartl DL (2012) Chimeric genes as a source of rapid evolution in *Drosophila*  
1607 *melanogaster*. *Molecular Biology and Evolution*, **29**, 517–529.
- 1608 Rozas J, Ferrer-Mata A, Sánchez-DelBarrio JC *et al.* (2017) DnaSP 6: DNA Sequence  
1609 Polymorphism Analysis of Large Datasets. *Molecular Biology and Evolution*, **34**, 3299–  
1610 3302.
- 1611 Salmela L, Schröder J (2011) Correcting errors in short reads by multiple alignments.  
1612 *Bioinformatics*, **27**, 1455–1461.
- 1613 Schlenke TA, Begun DJ (2003) Natural selection drives *Drosophila* immune system  
1614 evolution., **164**, 1471–1480.
- 1615 Schlötterer C, Neumeier H, Sousa C, Nolte V (2006) Highly structured Asian *Drosophila*  
1616 *melanogaster* populations: a new tool for hitchhiking mapping? *Genetics*, **172**, 287–  
1617 292.
- 1618 Schlötterer C, Tobler R, Kofler R, Nolte V (2014) Sequencing pools of individuals - mining  
1619 genome-wide polymorphism data without big funding. *Nature Reviews Genetics*, **15**,  
1620 749–763.
- 1621 Schmidt JM, Good RT, Appleton B *et al.* (2010) Copy number variation and transposable  
1622 elements feature in recent, ongoing adaptation at the *Cyp6g1* locus. *PLoS Genetics*, **6**,  
1623 e1000998.
- 1624 Schmidt PS, Paaby AB (2008) Reproductive Diapause and Life-History Clines in North  
1625 American Populations of *Drosophila melanogaster*. *Evolution*, **62**, 1204–1215.
- 1626 Schmidt PS, Zhu CT, Das J *et al.* (2008) An amino acid polymorphism in the *couch potato*  
1627 gene forms the basis for climatic adaptation in *Drosophila melanogaster*. *Proceedings*

- 1628        *of the National Academy of Sciences of the United States of America*, **105**, 16207–  
1629        16211.
- 1630    Sella G, Petrov DA, Przeworski M, Andolfatto P (2009) Pervasive Natural Selection in the  
1631        *Drosophila* Genome? *PLoS Genetics*, **5**, e1000495.
- 1632    Singh ND, Arndt PF, Clark AG, Aquadro CF (2009) Strong evidence for lineage and  
1633        sequence specificity of substitution rates and patterns in *Drosophila*. *Molecular Biology*  
1634        *and Evolution*, **26**, 1591–1605.
- 1635    Staubach F, Baines JF, Künzel S, Bik EM, Petrov DA (2013) Host species and  
1636        environmental effects on bacterial communities associated with *Drosophila* in the  
1637        laboratory and in the natural environment. *PLoS ONE*, **8**, e70749.
- 1638    Stephan W (2010) Genetic hitchhiking versus background selection: the controversy and  
1639        its implications. *Philosophical Transactions Of The Royal Society Of London Series B-*  
1640        *Biological Sciences*, **365**, 1245–1253.
- 1641    Svetec N, Pavlidis P, Stephan W (2009) Recent strong positive selection on *Drosophila*  
1642        *melanogaster* *HDAC6*, a gene encoding a stress surveillance factor, as revealed by  
1643        population genomic analysis. *Molecular Biology and Evolution*, **26**, 1549–1556.
- 1644    Tajima F (1989) Statistical method for testing the neutral mutation hypothesis by DNA  
1645        polymorphism. *Genetics*, **123**, 585–595.
- 1646    Trinder M, Daisley BA, Dube JS, Reid G (2017) *Drosophila melanogaster* as a High-  
1647        Throughput Model for Host-Microbiota Interactions. *Frontiers in microbiology*, **8**, 751.
- 1648    Turner TL, Levine MT, Eckert ML, Begun DJ (2008) Genomic analysis of adaptive  
1649        differentiation in *Drosophila melanogaster*. *Genetics*, **179**, 455–473.
- 1650    Umina PA, Weeks AR, Kearney MR, McKechnie SW, Hoffmann AA (2005) A rapid shift in  
1651        a classic clinal pattern in *Drosophila* reflecting climate change. *Science*, **308**, 691–693.
- 1652    Unckless RL (2011) A DNA virus of *Drosophila*. *PLoS ONE*, **6**, e26564.

- 1653 Voelker RA, Cockerham CC, Johnson FM *et al.* (1978) Inversions fail to account for  
1654 allozyme clines., **88**, 515–527.
- 1655 Watterson GA (1975) On the number of segregating sites in genetical models without  
1656 recombination. *Theoretical Population Biology*, **7**, 256–276.
- 1657 Webster CL, Longdon B, Lewis SH, Obbard DJ (2016) Twenty-Five New Viruses  
1658 Associated with the Drosophilidae (Diptera). *Evolutionary bioinformatics online*, **12**,  
1659 13–25.
- 1660 Webster CL, Waldron FM, Robertson S *et al.* (2015) The Discovery, Distribution, and  
1661 Evolution of Viruses Associated with *Drosophila melanogaster*. *PLoS Biology*, **13**,  
1662 e1002210.
- 1663 Weir BS, Cockerham CC (1984) Estimating *F*-Statistics for the Analysis of Population  
1664 Structure. *Evolution*, **38**, 1358–1370.
- 1665 Werren JH, Baldo L, Clark ME (2008) Wolbachia: master manipulators of invertebrate  
1666 biology. *Nature Reviews Microbiology*, **6**, 741–751.
- 1667 Wickham H (2016) *ggplot2: Elegant Graphics for Data Analysis*. Springer.
- 1668 Wilfert L, Longdon B, Ferreira AGA, Bayer F, Jiggins FM (2011) Trypanosomatids are  
1669 common and diverse parasites of *Drosophila*. *Parasitology*, **138**, 858–865.
- 1670 Wittmann MJ, Bergland AO, Feldman MW, Schmidt PS, Petrov DA (2017) Seasonally  
1671 fluctuating selection can maintain polymorphism at many loci via segregation lift.  
1672 *Proceedings of the National Academy of Sciences of the United States of America*,  
1673 **114**, E9932–E9941.
- 1674 Wolf JBW, Bayer T, Haubold B *et al.* (2010) Nucleotide divergence vs. gene expression  
1675 differentiation: comparative transcriptome sequencing in natural isolates from the  
1676 carrion crow and its hybrid zone with the hooded crow. *Molecular Ecology*, **19**, 162–  
1677 175.

- 1678 Wolff JN, Camus MF, Clancy DJ, Dowling DK (2016) Complete mitochondrial genome  
1679 sequences of thirteen globally sourced strains of fruit fly (*Drosophila melanogaster*)  
1680 form a powerful model for mitochondrial research. *Mitochondrial DNA. Part A, DNA*  
1681 *mapping, sequencing, and analysis*, **27**, 4672–4674.
- 1682 Xiao F-X, Yotova V, Zietkiewicz E *et al.* (2004) Human X-chromosomal lineages in Europe  
1683 reveal Middle Eastern and Asiatic contacts. *European Journal of Human Genetics*, **12**,  
1684 301–311.
- 1685 Yukilevich R, True JR (2008a) Incipient sexual isolation among cosmopolitan *Drosophila*  
1686 *melanogaster* populations. *Evolution*, **62**, 2112–2121.
- 1687 Yukilevich R, True JR (2008b) African morphology, behavior and pheromones underlie  
1688 incipient sexual isolation between us and Caribbean *Drosophila melanogaster*.  
1689 *Evolution*, **62**, 2807–2828.
- 1690 Yukilevich R, Turner TL, Aoki F, Nuzhdin SV, True JR (2010) Patterns and processes of  
1691 genome-wide divergence between North American and African *Drosophila*  
1692 *melanogaster*. *Genetics*, **186**, 219–239.
- 1693 Zanini F, Brodin J, Thebo L *et al.* (2015) Population genomics of inpatient HIV-1  
1694 evolution. (AK Chakraborty, Ed.). *eLife*, **4**, e11282.
- 1695



1696 **Figure legends**

1697

1698 **Figure 1. The conceptual framework of the *DrosEU* consortium.** By intensive spatio-  
1699 temporal sampling of natural populations of *Drosophila melanogaster*, the European  
1700 *Drosophila* Population Genomics Consortium (*DrosEU*; <http://droseu.net/>), aims to uncover  
1701 the factors that shape the evolutionary dynamics and the genomes of this exemplary  
1702 model organism. Each of the repeatedly and consistently sampled *DrosEU* populations is  
1703 subject to evolutionary forces ("Evolution axis", from neutral to adaptive evolution) in  
1704 interaction with the environment ("Environment axis", from local aspects to global patterns,  
1705 including spatial factors). In addition, there are several dimensions along which the fly  
1706 genomes can be studied, from single SNPs and genes to structural variants and co-  
1707 evolving genomes ("Genomics axis"), both over short and long timescales ("Timescale  
1708 axis").

1709

1710 **Figure 2. The geographic distribution of population samples.** The map shows the  
1711 geographic locations of all samples in the 2014 *DrosEU* dataset. The color of the circles  
1712 indicates the sampling season for each location.

1713

1714 **Figure 3. Sampling and data analysis pipeline.** The schematic diagram shows the  
1715 workflow of data collection and processing (A) followed by bioinformatic approaches used  
1716 for quality assessment and read mapping (B) as well as the downstream analyses (C)  
1717 conducted in this study (see Materials and Methods for further information).

1718

1719 **Figure 4. SNP sharing.** (A) Shared SNPs among *DrosEU* samples. Number and  
1720 proportion of SNPs in different samples, ranging from one specific sample to being shared

1721 among all 48 samples. (B) Shared SNPs among three worldwide populations. Elliptic Venn  
1722 diagram showing the number and proportion of SNPs overlapping among the 5,361,256  
1723 biallelic SNPs in *DrosEU* (Europe), 3,953,804 biallelic SNPs in DGRP (North America) and  
1724 4,643,511 biallelic SNPs in Zambia (Africa) populations.

1725

1726 **Figure 5. Genome-wide estimates of genetic diversity and recombination rates.** The  
1727 distribution of Tajima's  $\pi$ , Watterson's  $\theta$  and Tajima's  $D$  (from top to bottom) in 200 kb  
1728 non-overlapping windows plotted for each chromosomal arm separately. Bold black lines  
1729 depict statistics which were averaged across all 48 samples and the upper and lower grey  
1730 area show the corresponding standard deviations for each window. Red dashed lines  
1731 highlight the vertical position of a zero value. The bottom row shows log-transformed  
1732 recombination rates ( $r$ ) in 100kb non-overlapping windows as obtained from Comeron *et*  
1733 *al.* (2010).

1734

1735 **Figure 6. Signals of selective sweeps.** The central figure shows the distribution of  
1736 Tajima's  $D$  in 50 kb sliding windows with 40 kb overlap. The red and green dashed lines  
1737 highlight Tajima's  $D = 0$  and Tajima's  $D = -1$  respectively. The top panel shows the  
1738 magnification of a genomic region on chromosomal arm  $2R$  that harbors well-known  
1739 candidate loci for pesticide resistance, *Cyp6g1* and *Hen1* (highlighted in red), where strong  
1740 selection resulted in a selective sweep. This sweep is characterized by an excess of low-  
1741 frequency SNP variants, indicated by an overall negative Tajima's  $D$  in all samples. The  
1742 colored solid lines depict Tajima's  $D$  for each sample separately, whereas the black  
1743 dashed line shows Tajima's  $D$  averaged across all samples. (A legend for the color codes  
1744 of the samples can be found in the Supporting Information file in Figure S19). The bottom  
1745 figure shows a genomic region on  $3L$  which has not been identified as a potential target of

1746 selection but shows Tajima's  $D$  patterns similar to the top figure. Notably, both regions are  
1747 also characterized by a strong reduction of genetic variation (Figure S10).

1748

1749 **Figure 7. Genetic differentiation among European populations.** (A) isolation by  
1750 distance estimated by average genetic differentiation ( $F_{ST}$ ) of 21,008 SNPs located in short  
1751 introns (<60 bp) plotted against geographic distance. Mantel tests and linear regression  
1752 (red dashed line and statistics in upper left box) indicate significance. (B) Average neutral  
1753  $F_{ST}$  among populations. The center plot shows the distribution of average neutral  $F_{ST}$   
1754 values for all 1,128 pairwise combinations. Mean neutral  $F_{ST}$  values were calculated by  
1755 averaging individual  $F_{ST}$  values from 20,008 genome-wide intronic SNPs for each pairwise  
1756 comparison. The plots on the left and the right show population pairs in the lower (blue)  
1757 and upper (red) 5% tails of the  $F_{ST}$  distribution. (C) Population structure of all *DrosEU*  
1758 samples as determined by PCA of allele frequencies of 20,008 SNPs located in short  
1759 introns (< 60 bp). The optimal number of five clusters was estimated by hierarchical model  
1760 fitting using the first four principal components. Cluster assignment of each population,  
1761 which was estimated by  $k$ -means clustering, is indicated by color.

1762

1763 **Figure 8. Mitochondria.** (A) TCS network showing the relationship of 5 common  
1764 mitochondrial haplotypes; (B) estimated frequency of each mitochondrial haplotype in 48  
1765 European populations;

1766

1767 **Figure 9. Transposable elements.** Relative abundances of repeats among pools.  
1768 Proportion of each repeat class was estimated from sampled reads with dnaPipTE (2  
1769 samples per run, 0.1X coverage per sample).

1770

1771 **Figure 10. Distribution of inversion frequencies.** Cumulative bar plots showing the  
1772 absolute frequencies of six cosmopolitan inversions (*In(2L)t*, *In(2R)NS*, *In(3L)P*, *In(3R)C*,  
1773 *In(3R)Mo*, *In(3R)Payne*) in all 48 population samples of the *DrosEU* dataset.

1774

1775 **Figure 11. Microbiome.** Relative abundance of *Drosophila* associated microbes as  
1776 assessed by MGRAST classified shotgun sequences. Microbes had to reach at least 3%  
1777 relative abundance in one of the samples to be presented.

1778 **Tables**

1779

1780 **Table 1. Sample information for all populations in the *DrosEU* dataset.** The table shows the origin, collection data and season and1781 sample size (number of chromosomes: *n*) of the 48 samples in the *DrosEU* dataset. Additional information can be found in the supporting

1782 information in Table S1.

| ID           | Country        | Location          | Coll. Date | Number ID | Lat (°) | Lon (°) | Alt (m) | Season | n  | Coll. name                 |
|--------------|----------------|-------------------|------------|-----------|---------|---------|---------|--------|----|----------------------------|
| AT_Mau_14_01 | Austria        | Mauternbach       | 2014-07-20 | 1         | 48.38   | 15.56   | 572     | S      | 80 | Andrea J. Betancourt       |
| AT_Mau_14_02 | Austria        | Mauternbach       | 2014-10-19 | 2         | 48.38   | 15.56   | 572     | F      | 80 | Andrea J. Betancourt       |
| TR_Yes_14_03 | Turkey         | Yesiloz           | 2014-08-31 | 3         | 40.23   | 32.26   | 680     | S      | 80 | Banu Sebnem Onder          |
| TR_Yes_14_04 | Turkey         | Yesiloz           | 2014-10-23 | 4         | 40.23   | 32.26   | 680     | F      | 80 | Banu Sebnem Onder          |
| FR_Vil_14_05 | France         | Viltain           | 2014-08-18 | 5         | 48.75   | 2.16    | 153     | S      | 80 | Catherine Montchamp-Moreau |
| FR_Vil_14_07 | France         | Viltain           | 2014-10-27 | 7         | 48.75   | 2.16    | 153     | F      | 80 | Catherine Montchamp-Moreau |
| FR_Got_14_08 | France         | Gotheron          | 2014-07-08 | 8         | 44.98   | 4.93    | 181     | S      | 80 | Cristina Vieira            |
| UK_She_14_09 | United Kingdom | Sheffield         | 2014-08-25 | 9         | 53.39   | -1.52   | 100     | S      | 80 | Damiano Porcelli           |
| UK_Sou_14_10 | United Kingdom | South Queensferry | 2014-07-14 | 10        | 55.97   | -3.35   | 19      | S      | 80 | Darren Obbard              |
| CY_Nic_14_11 | Cyprus         | Nicosia           | 2014-08-10 | 11        | 35.07   | 33.32   | 263     | S      | 80 | Eliza Argyridou            |
| UK_Mar_14_12 | United Kingdom | Market Harborough | 2014-10-20 | 12        | 52.48   | -0.92   | 80      | F      | 80 | Eran Tauber                |
| UK_Lut_14_13 | United Kingdom | Lutterworth       | 2014-10-20 | 13        | 52.43   | -1.10   | 126     | F      | 80 | Eran Tauber                |

|              |          |                 |            |    |       |       |     |   |    |                      |
|--------------|----------|-----------------|------------|----|-------|-------|-----|---|----|----------------------|
| DE_Bro_14_14 | Germany  | Broggingen      | 2014-06-26 | 14 | 48.22 | 7.82  | 173 | S | 80 | Fabian Staubach      |
| DE_Bro_14_15 | Germany  | Broggingen      | 2014-10-15 | 15 | 48.22 | 7.82  | 173 | F | 80 | Fabian Staubach      |
| UA_Yal_14_16 | Ukraine  | Yalta           | 2014-06-20 | 16 | 44.50 | 34.17 | 72  | S | 80 | Iryna Kozeretska     |
| UA_Yal_14_18 | Ukraine  | Yalta           | 2014-08-27 | 18 | 44.50 | 34.17 | 72  | S | 80 | Iryna Kozeretska     |
| UA_Ode_14_19 | Ukraine  | Odesa           | 2014-07-03 | 19 | 46.44 | 30.77 | 54  | S | 80 | Iryna Kozeretska     |
| UA_Ode_14_20 | Ukraine  | Odesa           | 2014-07-22 | 20 | 46.44 | 30.77 | 54  | S | 80 | Iryna Kozeretska     |
| UA_Ode_14_21 | Ukraine  | Odesa           | 2014-08-29 | 21 | 46.44 | 30.77 | 54  | S | 80 | Iryna Kozeretska     |
| UA_Ode_14_22 | Ukraine  | Odesa           | 2014-10-10 | 22 | 46.44 | 30.77 | 54  | F | 80 | Iryna Kozeretska     |
| UA_Kyi_14_23 | Ukraine  | Kyiv            | 2014-08-09 | 23 | 50.34 | 30.49 | 179 | S | 80 | Iryna Kozeretska     |
| UA_Kyi_14_24 | Ukraine  | Kyiv            | 2014-09-08 | 24 | 50.34 | 30.49 | 179 | F | 80 | Iryna Kozeretska     |
| UA_Var_14_25 | Ukraine  | Varva           | 2014-08-18 | 25 | 50.48 | 32.71 | 125 | S | 80 | Oleksandra Protsenko |
| UA_Pyr_14_26 | Ukraine  | Pyriatyn        | 2014-08-20 | 26 | 50.25 | 32.52 | 114 | S | 80 | Oleksandra Protsenko |
| UA_Dro_14_27 | Ukraine  | Drogobych       | 2014-08-24 | 27 | 49.33 | 23.50 | 275 | S | 80 | Iryna Kozeretska     |
| UA_Cho_14_28 | Ukraine  | Chornobyl       | 2014-09-13 | 28 | 51.37 | 30.14 | 121 | F | 80 | Iryna Kozeretska     |
| UA_Cho_14_29 | Ukraine  | Chornobyl Yaniv | 2014-09-13 | 29 | 51.39 | 30.07 | 121 | F | 80 | Iryna Kozeretska     |
| SE_Lun_14_30 | Sweden   | Lund            | 2014-07-31 | 30 | 55.69 | 13.20 | 51  | S | 80 | Jessica Abbott       |
| DE_Mun_14_31 | Germany  | Munich          | 2014-06-19 | 31 | 48.18 | 11.61 | 520 | S | 80 | John Parsch          |
| DE_Mun_14_32 | Germany  | Munich          | 2014-09-03 | 32 | 48.18 | 11.61 | 520 | F | 80 | John Parsch          |
| PT_Rec_14_33 | Portugal | Recarei         | 2014-09-26 | 33 | 41.15 | -8.41 | 175 | F | 80 | Jorge Vieira         |

|              |             |                       |            |    |       |       |     |   |    |                     |
|--------------|-------------|-----------------------|------------|----|-------|-------|-----|---|----|---------------------|
| ES_Gim_14_34 | Spain       | Gimenells (Lleida)    | 2014-10-20 | 34 | 41.62 | 0.62  | 173 | F | 80 | Lain Guio           |
| ES_Gim_14_35 | Spain       | Gimenells (Lleida)    | 2014-08-13 | 35 | 41.62 | 0.62  | 173 | S | 80 | Lain Guio           |
| FI_Aka_14_36 | Finland     | Akaa                  | 2014-07-25 | 36 | 61.10 | 23.52 | 88  | S | 80 | Maaria Kankare      |
| FI_Aka_14_37 | Finland     | Akaa                  | 2014-08-27 | 37 | 61.10 | 23.52 | 88  | S | 80 | Maaria Kankare      |
| FI_Ves_14_38 | Finland     | Vesanto               | 2014-07-26 | 38 | 62.55 | 26.24 | 121 | S | 66 | Maaria Kankare      |
| DK_Kar_14_39 | Denmark     | Karensminde           | 2014-09-01 | 39 | 55.95 | 10.21 | 15  | F | 80 | Mads Fristrup Schou |
| DK_Kar_14_41 | Denmark     | Karensminde           | 2014-11-25 | 41 | 55.95 | 10.21 | 15  | F | 80 | Mads Fristrup Schou |
| CH_Cha_14_42 | Switzerland | Chalet à Gobet        | 2014-07-24 | 42 | 46.57 | 6.70  | 872 | S | 80 | Martin Kapun        |
| CH_Cha_14_43 | Switzerland | Chalet à Gobet        | 2014-10-05 | 43 | 46.57 | 6.70  | 872 | F | 80 | Martin Kapun        |
| AT_See_14_44 | Austria     | Seeboden              | 2014-08-17 | 44 | 46.81 | 13.51 | 591 | S | 80 | Martin Kapun        |
| UA_Kha_14_45 | Ukraine     | Kharkiv               | 2014-07-26 | 45 | 49.82 | 36.05 | 141 | S | 80 | Svitlana Serga      |
| UA_Kha_14_46 | Ukraine     | Kharkiv               | 2014-09-14 | 46 | 49.82 | 36.05 | 141 | F | 80 | Svitlana Serga      |
| UA_Cho_14_47 | Ukraine     | Chornobyl Applegarden | 2014-09-13 | 47 | 51.27 | 30.22 | 121 | F | 80 | Svitlana Serga      |
| UA_Cho_14_48 | Ukraine     | Chornobyl Polisske    | 2014-09-13 | 48 | 51.28 | 29.39 | 121 | F | 70 | Svitlana Serga      |
| UA_Kyi_14_49 | Ukraine     | Kyiv                  | 2014-10-11 | 49 | 50.34 | 30.49 | 179 | F | 80 | Svitlana Serga      |
| UA_Uma_14_50 | Ukraine     | Uman                  | 2014-10-01 | 50 | 48.75 | 30.21 | 214 | F | 80 | Svitlana Serga      |
| RU_Val_14_51 | Russia      | Valday                | 2014-08-17 | 51 | 57.98 | 33.24 | 217 | S | 80 | Elena Pasyukova     |

1783

1784

1785 **Table 2. Clinality of genetic variation and population structure.** Effects of geographic variables and/or seasonality on genome-wide  
1786 average levels of diversity ( $\pi$ ,  $\theta$  and Tajima's  $D$ ; top rows) and on the first three axes of a PCA based on allele frequencies at neutrally  
1787 evolving sites (bottom rows). The values represent  $F$ -ratios from general linear models. Bold type indicates  $F$ -ratios that are significant  
1788 after Bonferroni correction (adjusted  $\alpha=0.0055$ ). Asterisks in parentheses indicate significance when accounting for spatial  
1789 autocorrelation by spatial error models. These models were only calculated when Moran's  $I$  test, as shown in the last column, was  
1790 significant. \* $p < 0.05$ ; \*\* $p < 0.01$ ; \*\*\* $p < 0.001$ .

1791

| <b>Factor</b>    | <b>Latitude</b> | <b>Longitude</b>      | <b>Altitude</b> | <b>Season</b> | <b>Moran's I</b> |
|------------------|-----------------|-----------------------|-----------------|---------------|------------------|
| $\pi_{(X)}$      | 4.11*           | 1.62                  | <b>15.23***</b> | 1.65          | 0.86             |
| $\pi_{(Aut)}$    | 0.91            | 2.54                  | <b>27.18***</b> | 0.16          | -0.86            |
| $\theta_{(X)}$   | 2.65            | 1.31                  | <b>15.54***</b> | 2.22          | 0.24             |
| $\theta_{(Aut)}$ | 0.48            | 1.44                  | <b>13.66***</b> | 0.37          | -1.13            |
| $D_{(X)}$        | 0.02            | 0.38                  | 5.93*           | 3.26          | -2.08            |
| $D_{(Aut)}$      | 0.09            | 0.76                  | 5.33*           | 0.71          | -1.45            |
| PC1              | 0.06            | <b>120.72***(***)</b> | 5.35*(*)        | 2.53          | 4.15***          |
| PC2              | 3.5             | <b>10.22**</b>        | <b>15.21***</b> | 1.97          | -1.96            |



PC3 0.14 0.11 0.01 1.29 | 0.22

1792

1793

1794 **Table 3. Clinality and/or seasonality of chromosomal inversions.** The values represent *F*-ratios from generalized linear models with  
 1795 a binomial error structure to account for frequency data. Bold type indicates deviance values that were significant after Bonferroni  
 1796 correction (adjusted  $\alpha=0.0071$ ). Stars in parentheses indicate significance when accounting for spatial autocorrelation by spatial error  
 1797 models. These models were only calculated when Moran's *I* test, as shown in the last column, was significant. \* $p < 0.05$ ; \*\* $p < 0.01$ ; \*\*\* $p$   
 1798  $< 0.001$

1799

| <i>Factor</i>      | <i>Latitude</i>     | <i>Longitude</i> | <i>Altitude</i> | <i>Season</i> | <i>Moran's I</i> |
|--------------------|---------------------|------------------|-----------------|---------------|------------------|
| <i>In(2L)t</i>     | 2.2                 | <b>10.09**</b>   | <b>43.94***</b> | 0.89          | -0.92            |
| <i>In(2R)NS</i>    | 0.25                | <b>14.43***</b>  | 2.88            | 2.43          | 1.25             |
| <i>In(3L)P</i>     | <b>21.78***</b>     | 2.82             | 0.62            | 3.6           | -1.61            |
| <i>In(3R)C</i>     | <b>18.5***(***)</b> | 0.75             | 1.42            | 0.04          | 2.79**           |
| <i>In(3R)Mo</i>    | 0.3                 | 0.09             | 0.35            | 0.03          | -0.9             |
| <i>In(3R)Payne</i> | <b>43.47***</b>     | 0.66             | 1.69            | 1.55          | -0.89            |

1800

1801 **Figures**

1802

1803 **Figure 1**

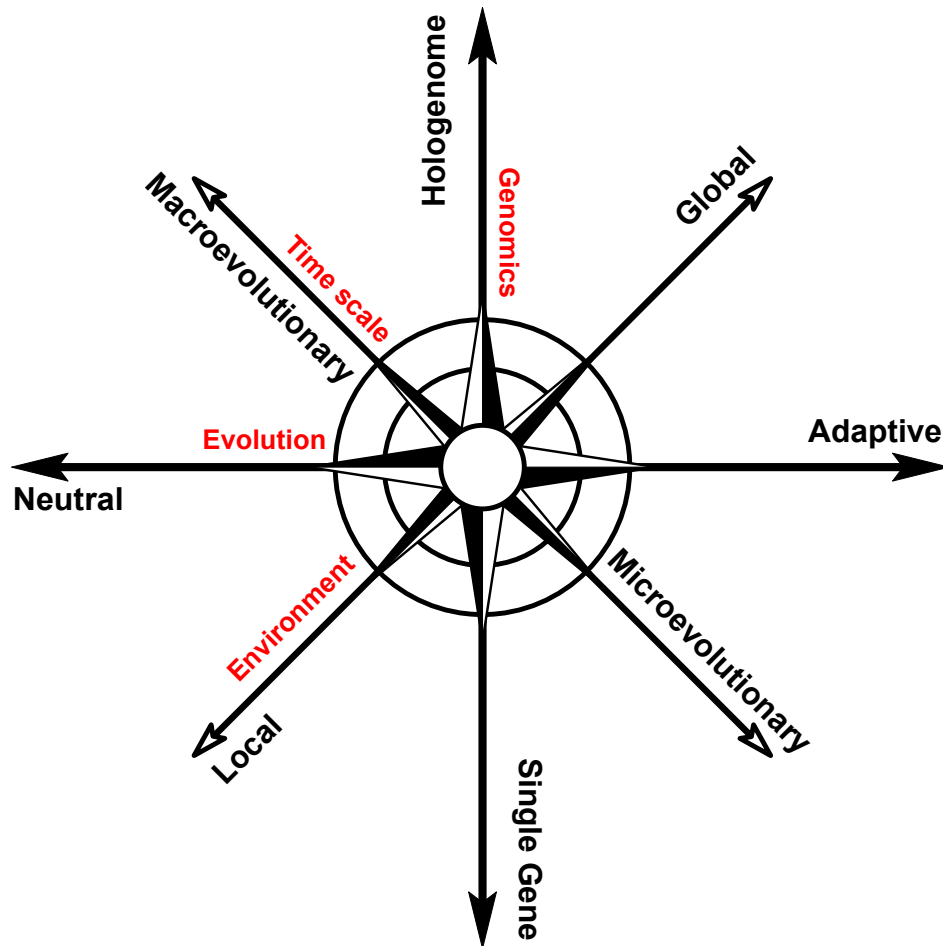

1804

1805

1806 **Figure 2**

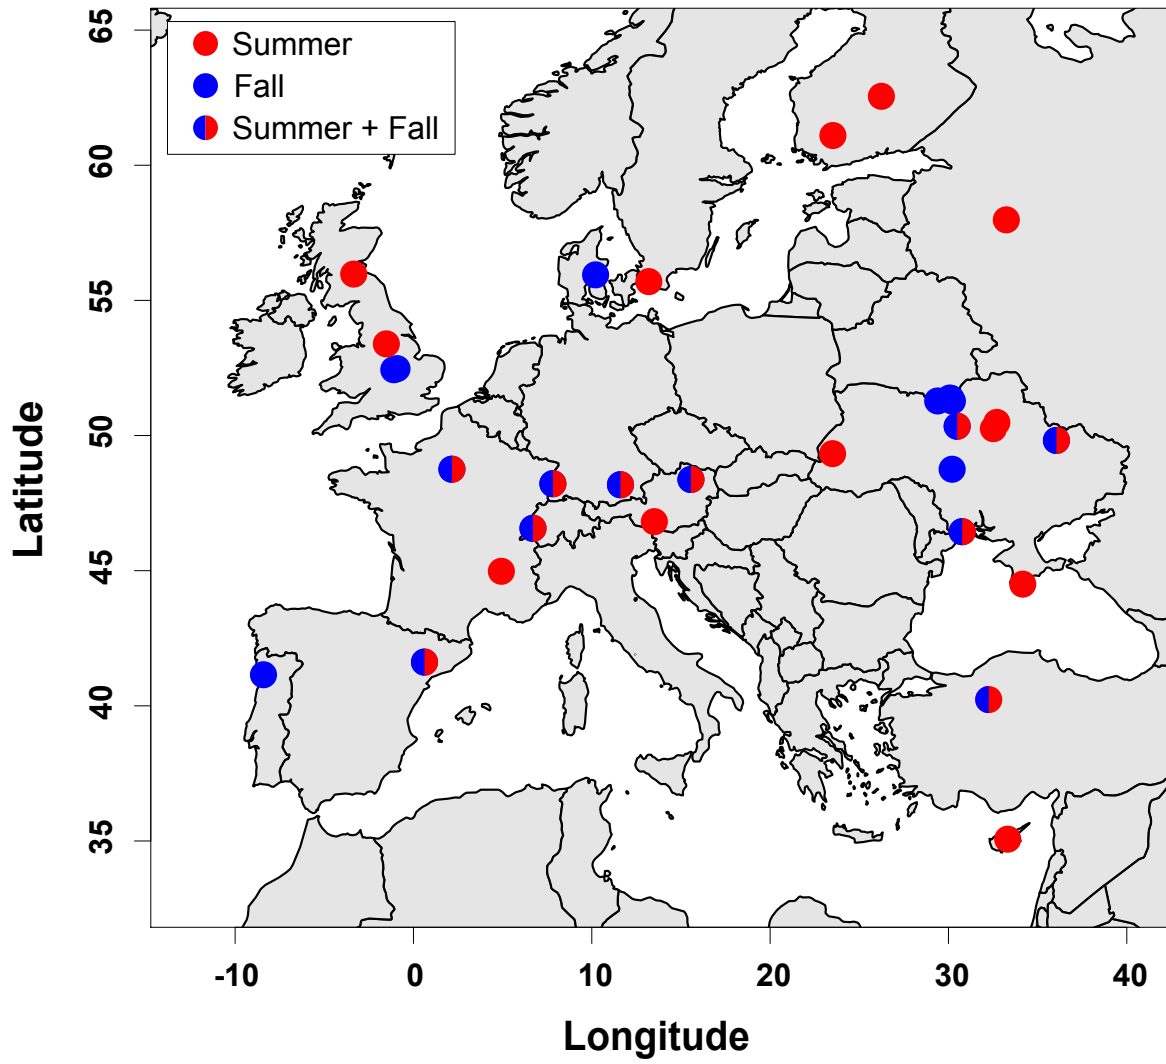

1807

1808

1809 **Figure 3**

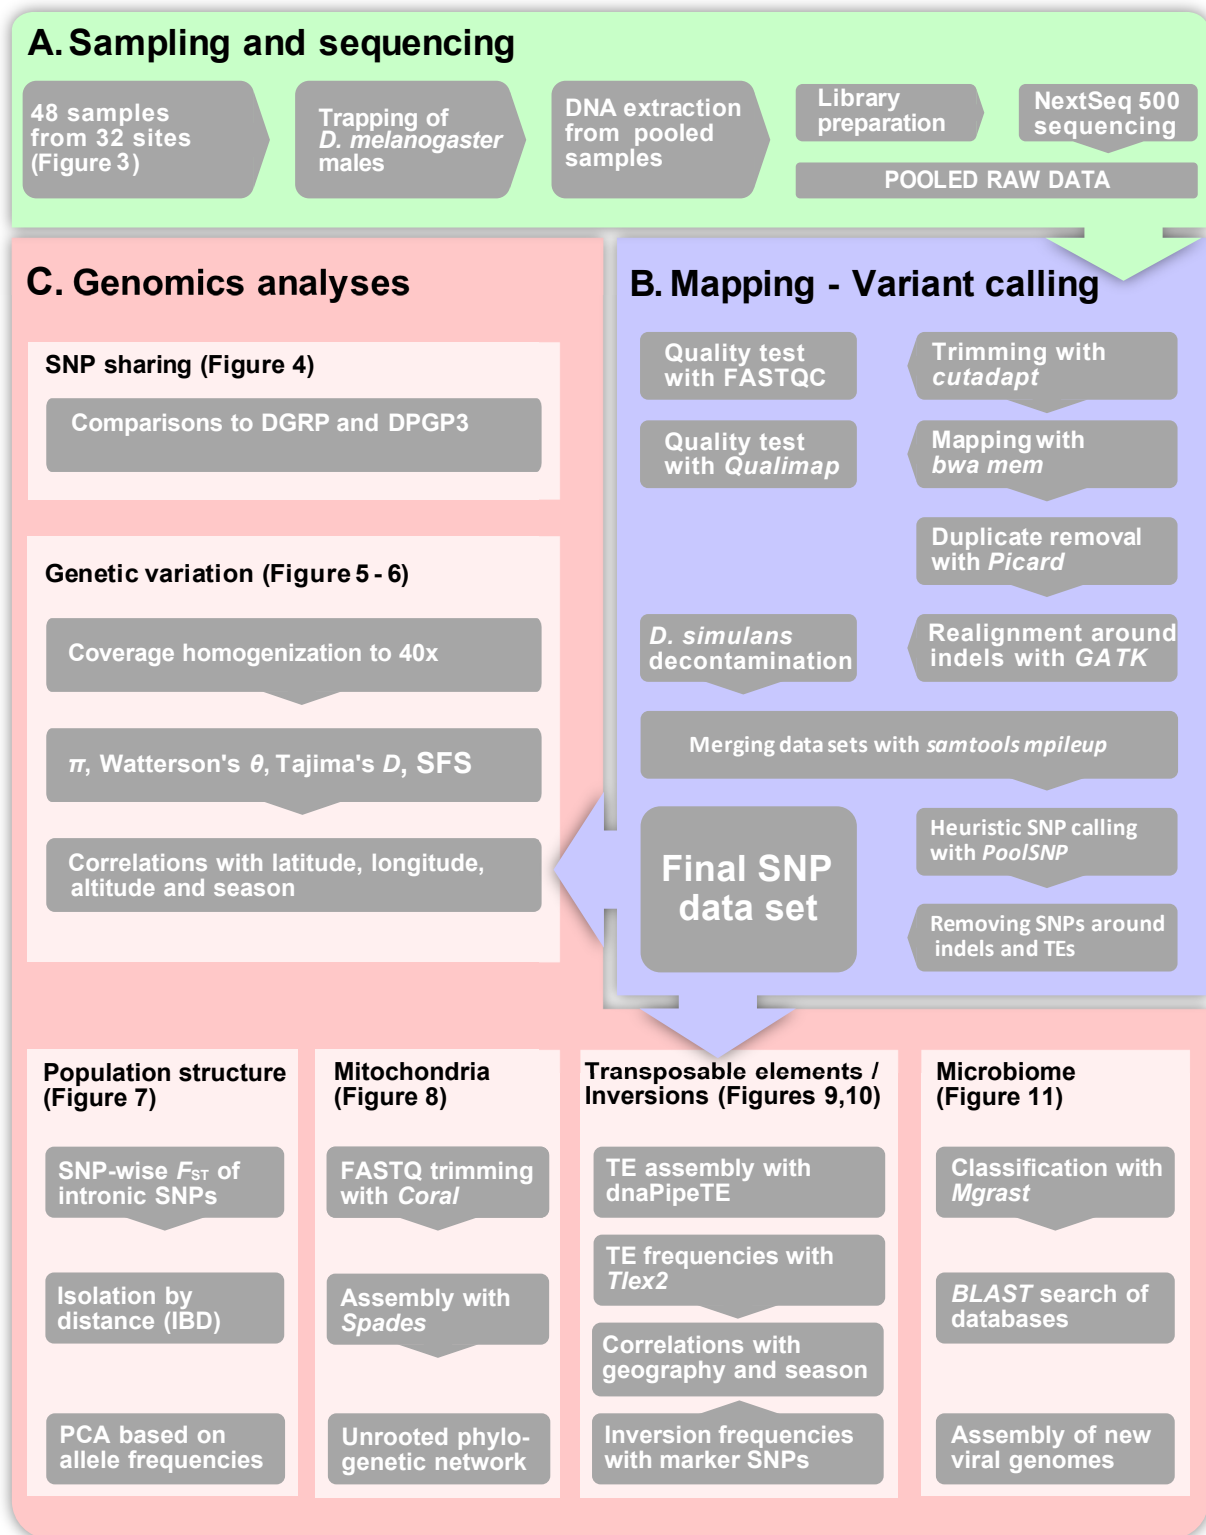

1810

1811

1812 **Figure 4**

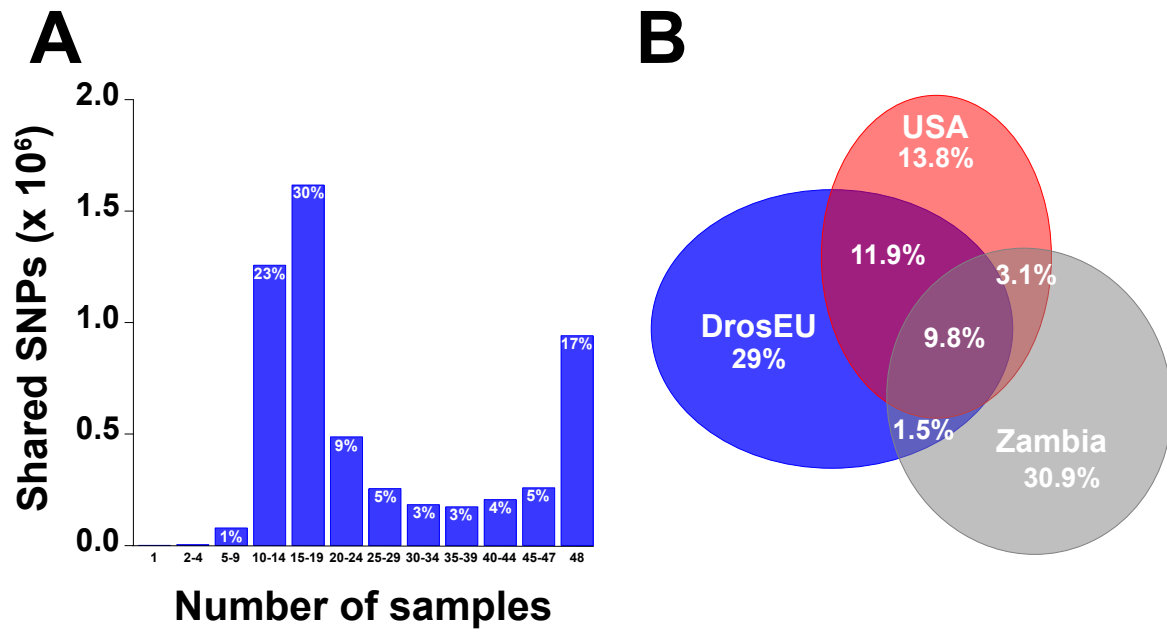

1813

1814

1815 **Figure 5**

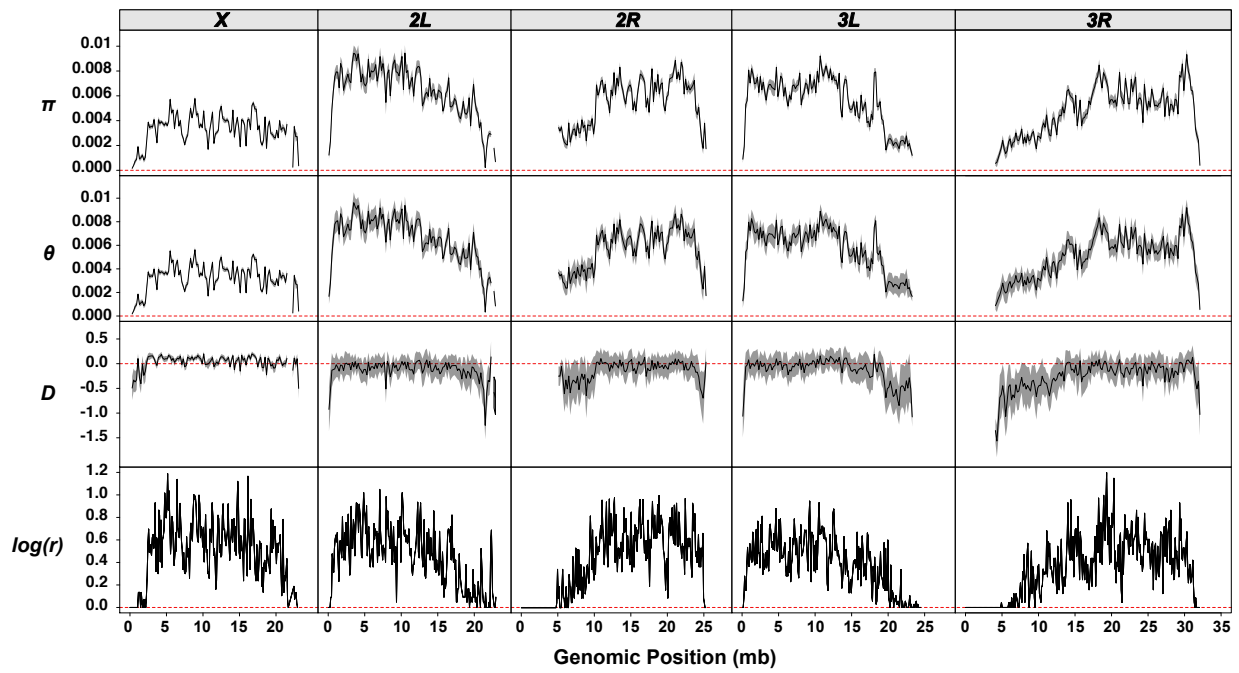

1816

1817

1818 **Figure 6**

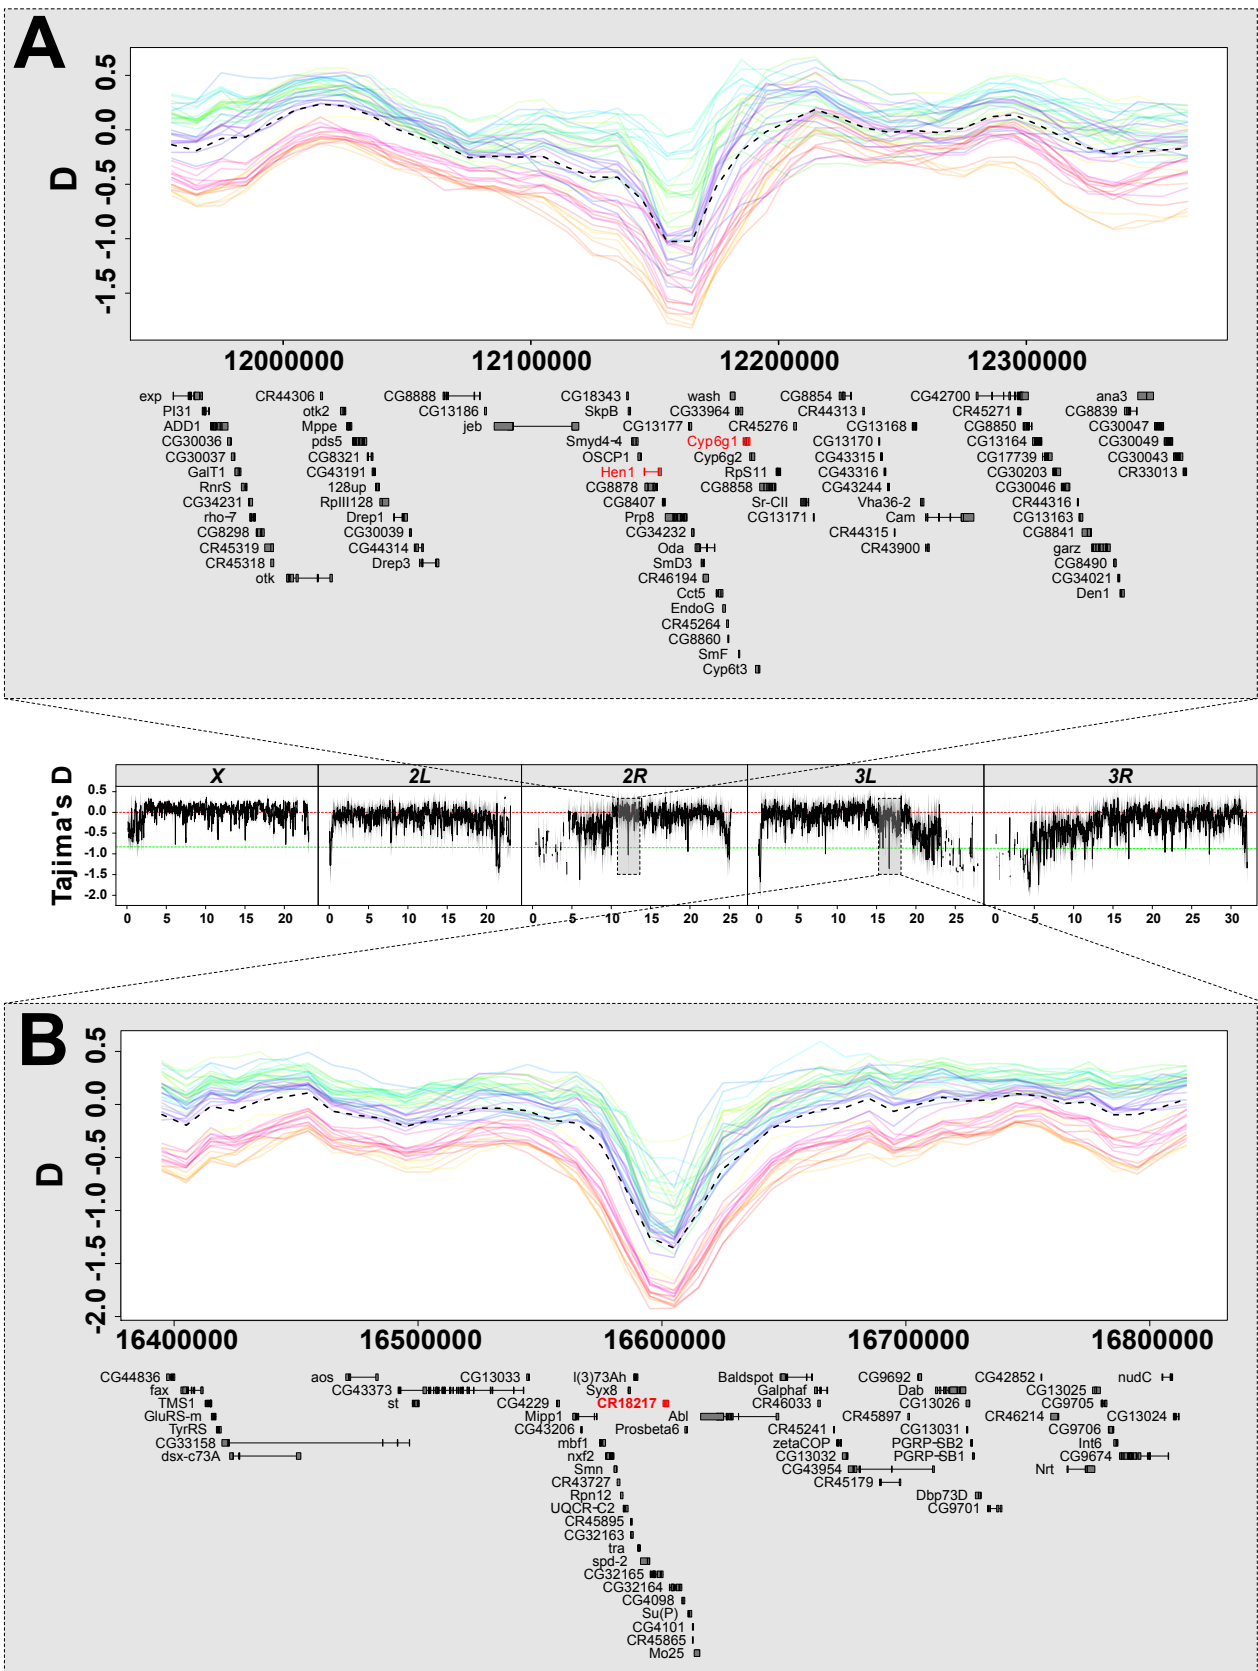



1820 **Figure 7**

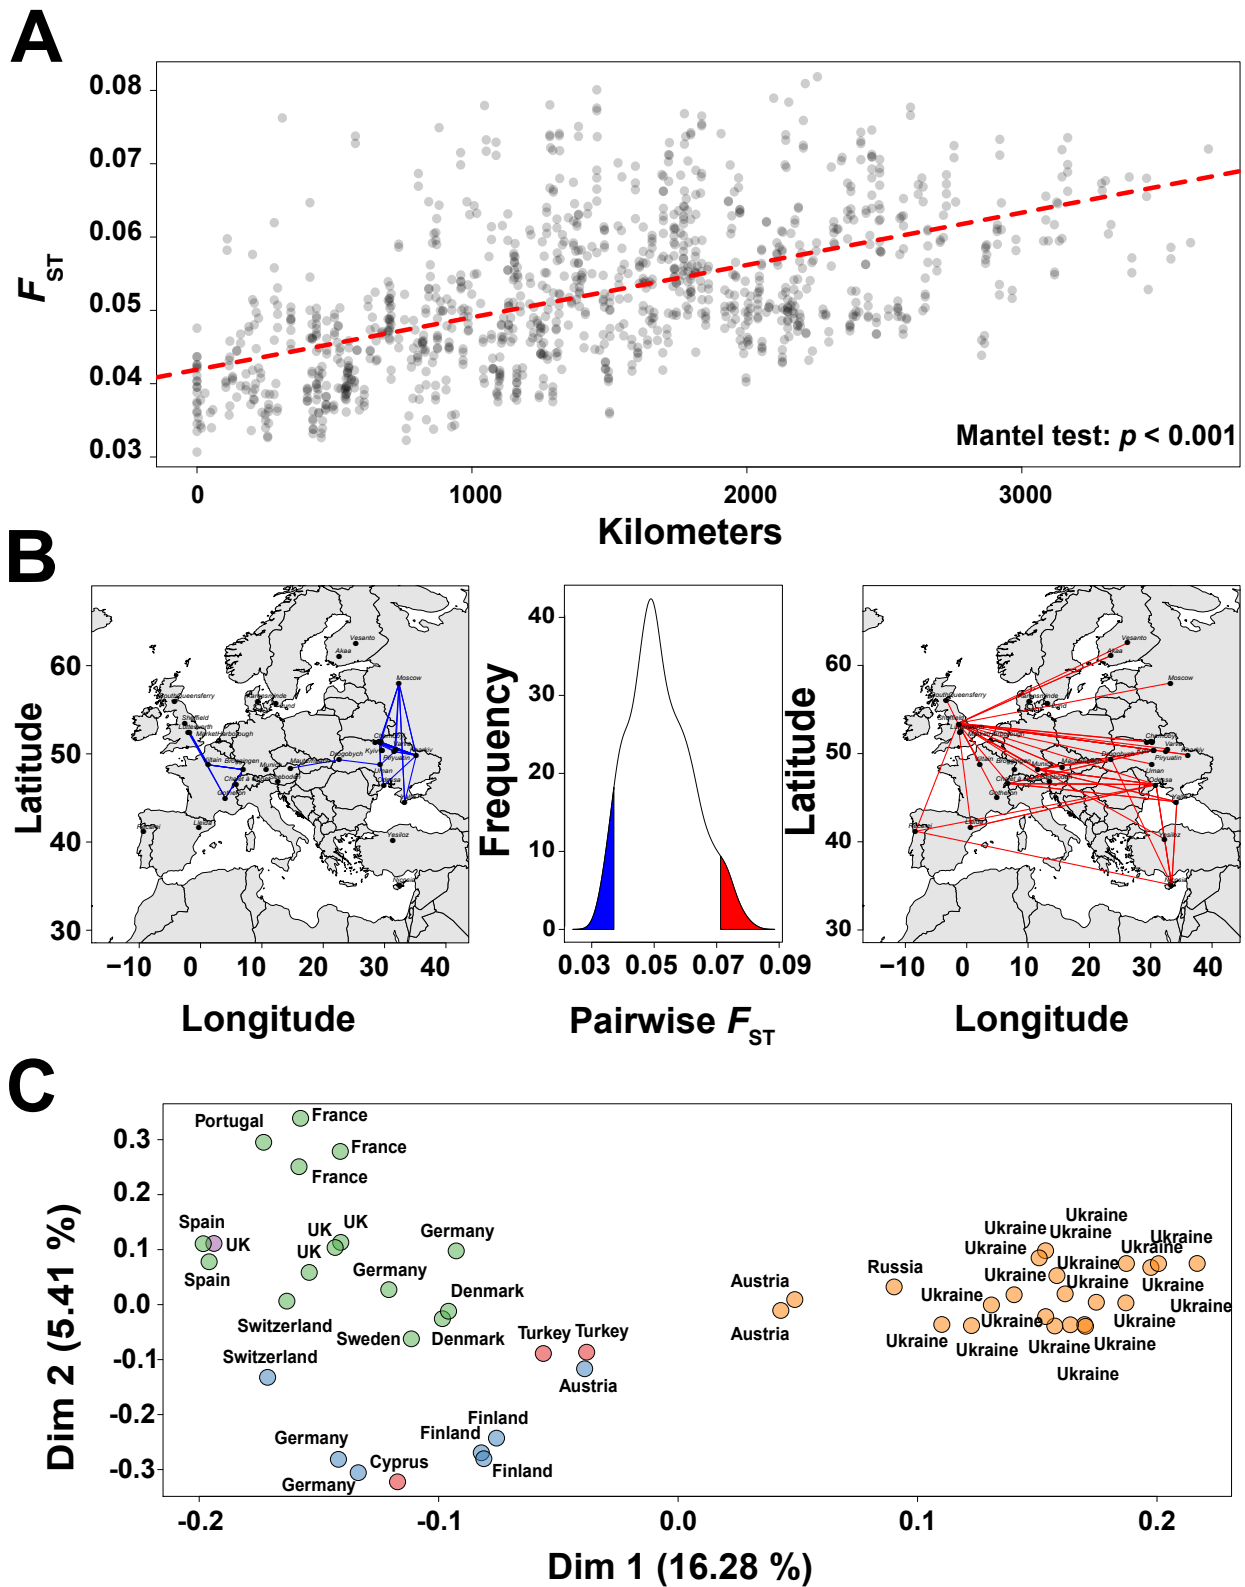

1821

1822

1823 **Figure 8**

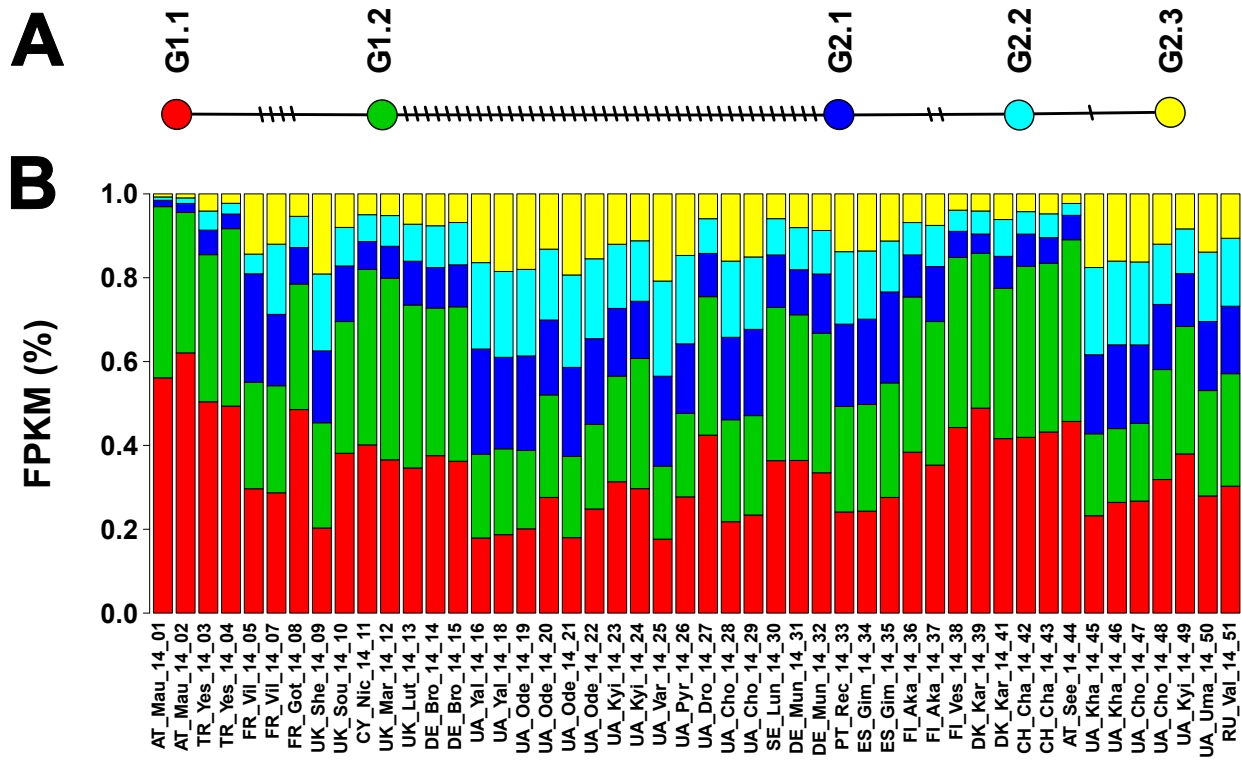

1824

1825

1826 **Figure 9**

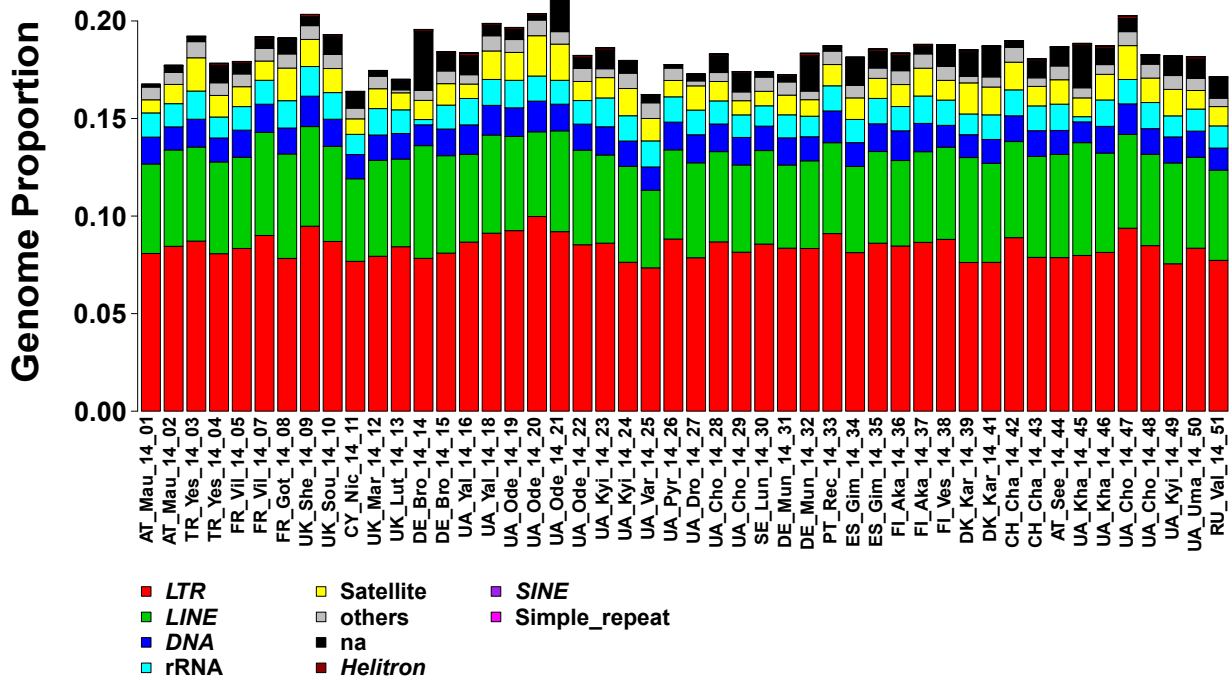

1827

1828

1829 **Figure 10**

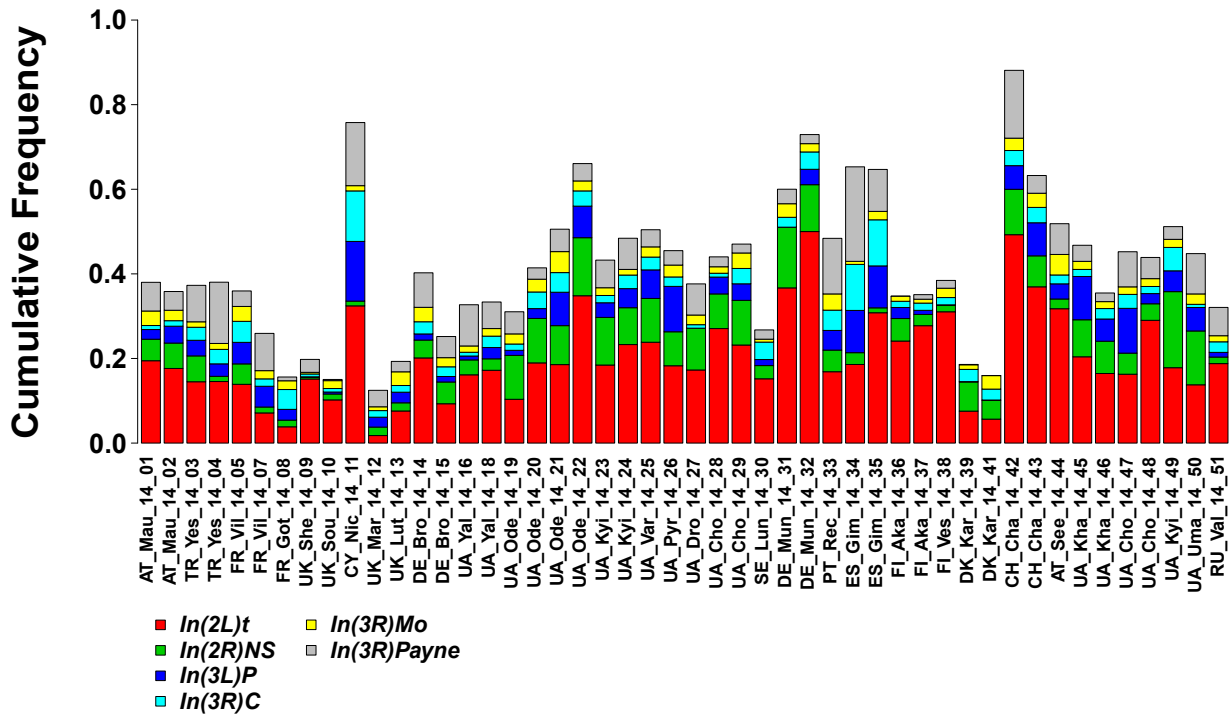

1830

1831

1832 **Figure 11**

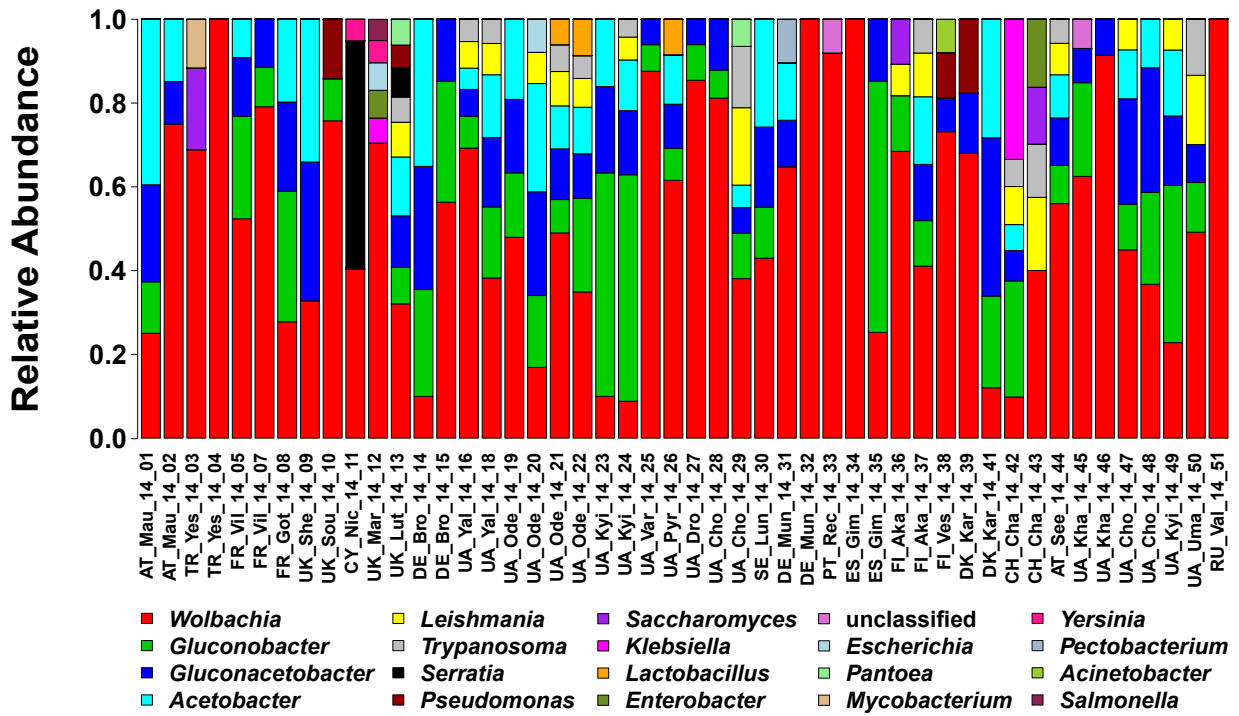

1833

1834
