1 **Genomic analysis of European *Drosophila* populations reveals major**  
2 **longitudinal structure, continent-wide selection, and unknown DNA**  
3 **viruses**

4  
5 Martin Kapun<sup>1,2,3,4,†,\*</sup>, Maite G. Barrón<sup>1,5,\*</sup>, Fabian Staubach<sup>1,6,§</sup>, Jorge Vieira<sup>1,7,8</sup>, Darren J.  
6 Obbard<sup>1,9</sup>, Clément Goubert<sup>1,10,11</sup>, Omar Rota-Stabelli<sup>1,12</sup>, Maaria Kankare<sup>1,13,§</sup>, María  
7 Bogaerts-Márquez<sup>1,5</sup>, Annabelle Haudry<sup>1,10</sup>, R. Axel W. Wiberg<sup>1,14,15</sup>, Lena Waidele<sup>1,6</sup>,  
8 Iryna Kozeretska<sup>1,16,17</sup>, Elena G. Pasyukova<sup>1,18</sup>, Volker Loeschcke<sup>1,19</sup>, Marta Pascual<sup>1,20</sup>,  
9 Cristina P. Vieira<sup>1,7,8</sup>, Svitlana Serga<sup>1,16</sup>, Catherine Montchamp-Moreau<sup>1,21</sup>, Jessica  
10 Abbott<sup>1,22</sup>, Patricia Gibert<sup>1,10</sup>, Damiano Porcelli<sup>1,23</sup>, Nico Posnien<sup>1,24</sup>, Alejandro Sánchez-  
11 Gracia<sup>1,20</sup>, Sonja Grath<sup>1,25</sup>, Élio Sucena<sup>1,26,27</sup>, Alan O. Bergland<sup>1,28,§</sup>, Maria Pilar Garcia  
12 Guerreiro<sup>1,29</sup>, Banu Sebnem Onder<sup>1,30</sup>, Eliza Argyridou<sup>1,25</sup>, Lain Guio<sup>1,5</sup>, Mads Fristrup  
13 Schou<sup>1,19,22</sup>, Bart Deplancke<sup>1,31</sup>, Cristina Vieira<sup>1,10</sup>, Michael G. Ritchie<sup>1,14</sup>, Bas J. Zwaan<sup>1,32</sup>,  
14 Eran Tauber<sup>1,33</sup>, Dorcas J. Orengo<sup>1,20</sup>, Eva Puerma<sup>1,20</sup>, Montserrat Agudé<sup>1,20</sup>, Paul S.  
15 Schmidt<sup>1,34,§</sup>, John Parsch<sup>1,25</sup>, Andrea J. Betancourt<sup>1,35</sup>, Thomas Flatt<sup>1,2,3,†,\*</sup>, Josefa  
16 González<sup>1,5,†,\*</sup>, §

17  
18 <sup>1</sup> The European *Drosophila* Population Genomics Consortium (*DrosEU*)

19 <sup>2</sup> Department of Ecology and Evolution, University of Lausanne, CH-1015 Lausanne,  
20 Switzerland

21 <sup>3</sup> Department of Biology, University of Fribourg, CH-1700 Fribourg, Switzerland

22 <sup>4</sup> Current affiliations: Department of Evolutionary Biology and Environmental Sciences,  
23 University of Zürich, CH-8057 Zürich, Switzerland; Department of Cell and Developmental  
24 Biology, Medical University of Vienna, AT-1090 Vienna, Austria

25 <sup>5</sup> Institute of Evolutionary Biology, CSIC-Universitat Pompeu Fabra, Barcelona, Spain

26 <sup>6</sup> Department of Evolutionary Biology and Ecology, University of Freiburg, 79104 Freiburg,  
27 German

28 <sup>7</sup> Instituto de Biologia Molecular e Celular (IBMC) University of Porto, Porto, Portugal

29 <sup>8</sup> Instituto de Investigação e Inovação em Saúde (I3S), University of Porto, Porto, Portugal

30 <sup>9</sup> Institute of Evolutionary Biology, University of Edinburgh, Edinburgh, United Kingdom

31 <sup>10</sup> Laboratoire de Biométrie et Biologie Evolutive, UMR CNRS 5558, University Lyon 1,  
32 Lyon, France

33 <sup>11</sup> Department of Molecular Biology and Genetics, 107 Biotechnology Building, Cornell  
34 University, Ithaca, New York 14853, USA

35 <sup>12</sup> Research and Innovation Centre, Fondazione Edmund Mach, San Michele all' Adige,  
36 Italy

37 <sup>13</sup> Department of Biological and Environmental Science, University of Jyväskylä,  
38 Jyväskylä, Finland

39 <sup>14</sup> Centre for Biological Diversity, School of Biology, University of St. Andrews, St Andrews,  
40 United Kingdom

41 <sup>15</sup> Evolutionary Biology, Zoological Institute, University of Basel, Basel, CH-4051,  
42 Switzerland

43 <sup>16</sup> General and Medical Genetics Department, Taras Shevchenko National University of  
44 Kyiv, Kyiv, Ukraine

45 <sup>17</sup> State Institution National Antarctic Center of Ministry of Education and Science of  
46 Ukraine, 16 Taras Shevchenko Blvd., 01601, Kyiv, Ukraine

47 <sup>18</sup> Laboratory of Genome Variation, Institute of Molecular Genetics of RAS, Moscow,  
48 Russia

49 <sup>19</sup> Department of Bioscience - Genetics, Ecology and Evolution, Aarhus University, Aarhus  
50 C, Denmark

- 51 <sup>20</sup> Departament de Genètica, Microbiologia i Estadística, Facultat de Biologia and Institut  
52 de Recerca de la Biodiversitat (IRBio), Universitat de Barcelona, Barcelona, Spain
- 53 <sup>21</sup> Laboratoire Evolution, Génomes, Comportement et Ecologie (EGCE) UMR 9191 CNRS  
54 - UMR247 IRD - Université Paris Sud - Université Paris Saclay. 91198 Gif sur Yvette  
55 Cedex, France.
- 56 <sup>22</sup> Department of Biology, Section for Evolutionary Ecology, Lund, Sweden
- 57 <sup>23</sup> Department of Animal and Plant Sciences, Sheffield, United Kingdom
- 58 <sup>24</sup> Universität Göttingen, Johann-Friedrich-Blumenbach-Institut für Zoologie und  
59 Anthropologie, Göttingen, Germany
- 60 <sup>25</sup> Division of Evolutionary Biology, Faculty of Biology, Ludwig-Maximilians-Universität  
61 München, Planegg, Germany
- 62 <sup>26</sup> Instituto Gulbenkian de Ciência, Oeiras, Portugal
- 63 <sup>27</sup> Departamento de Biologia Animal, Faculdade de Ciências da Universidade de Lisboa,  
64 Lisboa, Portugal
- 65 <sup>28</sup> Department of Biology, University of Virginia, Charlottesville, VA, USA
- 66 <sup>29</sup> Departament de Genètica i Microbiologia, Universitat Autònoma de Barcelona,  
67 Barcelona, Spain
- 68 <sup>30</sup> Department of Biology, Faculty of Science, Hacettepe University, Ankara, Turkey
- 69 <sup>31</sup> Laboratory of Systems Biology and Genetics, EPFL-SV-IBI-UPDEPLA, CH-1015  
70 Lausanne, Switzerland
- 71 <sup>32</sup> Laboratory of Genetics, Department of Plant Sciences, Wageningen University,  
72 Wageningen, Netherlands
- 73 <sup>33</sup> Department of Evolutionary and Environmental Biology and Institute of Evolution,  
74 University of Haifa, Haifa, Israel
- 75 <sup>34</sup> Department of Biology, University of Pennsylvania, Philadelphia, USA

76 <sup>35</sup> Institute of Integrative Biology, University of Liverpool, Liverpool, United Kingdom

77

78 † For correspondence: [martin.kapun@uzh.ch](mailto:martin.kapun@uzh.ch), [thomas.flatt@unifr.ch](mailto:thomas.flatt@unifr.ch),

79 [josefa.gonzalez@ibe.upf-csic.es](mailto:josefa.gonzalez@ibe.upf-csic.es).

80

81 \* These authors contributed equally to this work

82

83 § Members of the *Drosophila* Real Time Evolution (Dros-RTEC) Consortium

84

85 **Competing interests:** The authors declare that no competing interests exist.

86

## 87 **Abstract**

88 Genetic variation is the fuel of evolution but analysing the spatio-temporal dynamics of  
89 genetic changes in natural populations is challenging, comprehensive sampling logistically  
90 difficult, and sequencing of entire populations costly. Here we address these issues by  
91 performing the first continent-wide genomic analysis of genetic variation in European  
92 *Drosophila melanogaster*, based on 48 pool-sequencing samples from 32 populations. Our  
93 analyses uncover a novel pattern of major longitudinal population structure; establish  
94 previously unknown clines in inversions and transposable elements across Europe; and  
95 provide evidence for non-local, continent-wide selective sweeps that are shared among  
96 the majority of populations. We also find pronounced variation among populations in the  
97 composition of the fly microbiome and identify five new DNA viruses adding to a single  
98 example known so far for this species. Our study has important implications for the  
99 evolution and demography of *D. melanogaster*, an ancestrally African species that first  
100 colonized Europe before becoming cosmopolitan.

101

102 Keywords: Population genomics, demography, selection, clines, SNPs, structural variants,  
103 symbionts, viruses.

104

## 105 **Introduction**

106 Studying the processes that create and maintain genetic variation in natural populations is  
107 fundamental to understanding the process of evolution (Dobzhansky 1970; Lewontin 1974;  
108 Kreitman 1983; Kimura 1984; Hudson *et al.* 1987; McDonald & Kreitman 1991; Adrian &  
109 Comeron 2013). Until recently, technological constraints have limited studies of natural  
110 genetic variation to small genomic regions and small numbers of individuals. With the  
111 development of population genomics, we can now analyse patterns of genetic variation on  
112 a genome-wide scale for large numbers of individuals, with sampling structured across  
113 space and time. As a result, we have gained fundamental new insights into evolutionary  
114 dynamics of genetic variation in natural populations (e.g., Hohenlohe *et al.* 2010; Cheng *et*  
115 *al.* 2012; Begun *et al.* 2007; Pool *et al.* 2012; Harpur *et al.* 2014; Zanini *et al.* 2015).  
116 Despite this recent technological progress, extensive large-scale sampling and genome  
117 sequencing of populations remains prohibitively expensive in terms of cost and labor for  
118 any individual research group.

119

120 Here, we present the first comprehensive, continent-wide genomic analysis of genetic  
121 variation in European *Drosophila melanogaster*, based on 48 pool-sequencing samples  
122 from 32 populations collected in 2014 (Figure 1) by the European *Drosophila* Population  
123 Genomics Consortium (*DrosEU*; <https://droseu.net>). *D. melanogaster* offers several  
124 advantages for studying the relevant spatio-temporal scales of evolution: a relatively small  
125 genome, a broad geographic range, a multivoltine life history that allows sampling across

126 generations over short timescales, ease of sampling natural populations using  
127 standardized techniques, and a well-developed context for population genomic analysis  
128 (e.g., Powell 1997; Keller 2007; Hales *et al.* 2015). Importantly, this species is studied by  
129 an extensive research community, with a long history of developing shared resources  
130 (Larracuente & Roberts 2015; Bilder & Irvine 2017).

131

132 The current study complements and extends previous studies of genetic variation in *D.*  
133 *melanogaster*, both from its native range in sub-Saharan Africa and from its world-wide  
134 expansion as a human commensal into Europe 10–20,000 years ago and into North  
135 America and Australia in the last few centuries (e.g., Lachaise *et al.* 1988; David & Capy  
136 1988; Li & Stephan 2006; Keller 2007; Sprengelmeyer *et al.* 2018; Arguello *et al.* 2019;  
137 also cf. Kapopoulou *et al.* 2018a). The colonization of novel habitats and climate zones on  
138 multiple continents makes *D. melanogaster* especially powerful for studying parallel local  
139 adaptation. Previous studies of genomic variation have uncovered latitudinal clines in  
140 allele frequencies (e.g., Schmidt & Paaby 2008; Turner *et al.* 2008; Kolaczkowski *et al.*  
141 2011b; Fabian *et al.* 2012; Bergland *et al.* 2014; Machado *et al.* 2016; Kapun *et al.* 2016a),  
142 structural variants such as chromosomal inversions (reviewed in Kapun & Flatt 2019),  
143 transposable elements (TEs) (Boussy *et al.* 1998; González *et al.* 2008; 2010), and  
144 complex phenotypes (de Jong & Bochdanovits 2003; Schmidt & Paaby 2008; Schmidt *et*  
145 *al.* 2008; Kapun *et al.* 2016b; Behrman *et al.* 2018). Thus far, sampling across these  
146 latitudinal gradients has been restricted to single transects on the east coasts of Australia  
147 and North America; in addition to parallel local adaptation, clines on these continents may  
148 be due to admixture between cohorts of flies with different colonization histories (Caracristi  
149 & Schlötterer 2003; Yukilevich & True 2008a; b; Duchon *et al.* 2013; Kao *et al.* 2015;  
150 Bergland *et al.* 2016).

151

152 In contrast, the population genomics of *D. melanogaster* on the European continent  
153 remains largely uncharacterized (Božičević *et al.* 2016; Pool *et al.* 2016; Mateo *et al.*  
154 2018). Because Eurasia was the first continent colonized by *D. melanogaster* as they  
155 migrated out of Africa, we sought to understand how this species has adapted to new  
156 habitats and climate zones in Europe, where it has been established the longest (Lachaise  
157 *et al.* 1988; David & Capy 1988). We analyse our data at three levels: (1) variation at  
158 single-nucleotide polymorphisms (SNPs) in nuclear and mitochondrial (mtDNA) genomes  
159 ( $\sim 5.5 \times 10^6$  SNPs in total); (2) structural variation, including TE insertions and  
160 chromosomal inversions; and (3) variation in the microbiota associated with flies, including  
161 bacteria, fungi, protists, and viruses.

162

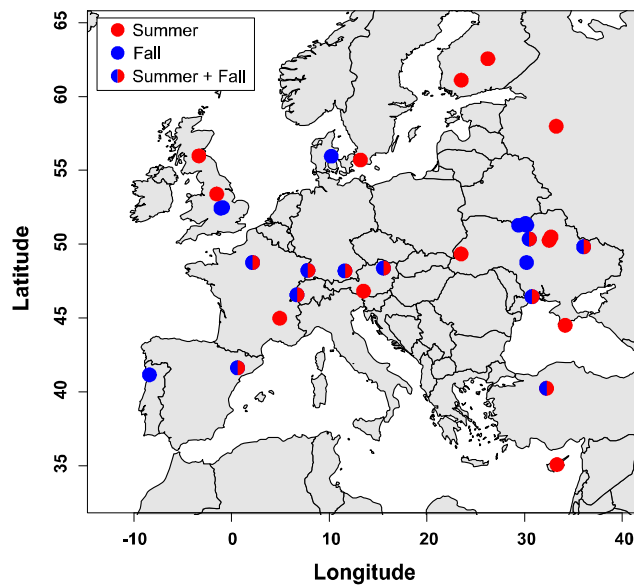

163

164 **Figure 1. The geographic distribution of population samples.** Locations of all samples in the 2014 *DrosEU* data set.  
165 The color of the circles indicates the sampling season for each location: ten of the 32 locations were sampled at least  
166 twice, once in summer and once in fall (see Table 1 and Supplemental Table 1). Note that some of the 12 Ukrainian  
167 locations overlap in the map.

168

169

## 170 Results

171 As part of the *DrosEU* consortium, we collected 48 population samples of *D. melanogaster*  
172 from 32 geographical locations across Europe in 2014 (Table 1; Figure 1). We performed  
173 pooled sequencing (Pool-Seq) of all 48 samples, with an average autosomal coverage  
174  $\geq 50x$  (Table S1). Of the 32 locations, 10 were sampled at least once in summer and once  
175 in fall (Figure 1), allowing a preliminary analysis of seasonal change in allele frequencies  
176 on a genome-wide scale.

177

### 178 European and other derived populations exhibit similar amounts of genetic variation

179 For each sample, we estimated genome-wide levels of nucleotide diversity ( $\pi$  and  
180 Watterson's  $\theta$ , corrected for pooling; Futschik 2010; Kofler *et al.* 2011). We find that most  
181 European populations have similar levels of genetic variation (Table S1). Moreover, our  
182 estimates of pairwise nucleotide diversity are similar to those from derived non-African  
183 (North American and Australian) populations, whether sequenced as individuals or as  
184 pools (Figure 2 and Table S2). Thus, although European populations are considerably  
185 older than North American and Australian populations, they exhibit similar levels of DNA  
186 sequence variability.

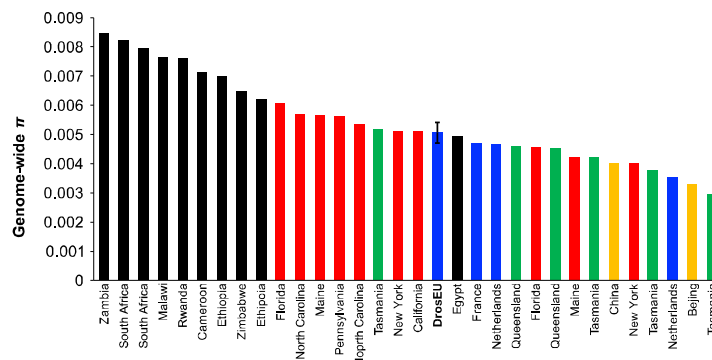

187

188 **Figure 2. Genetic variation in worldwide samples.** Bar plot showing the distribution of genome-wide estimates of  
189 Tajima's  $\pi$  of the *DrosEU* and other genomic datasets (also see Table S2 and Materials and Methods) The error bar in  
190 the *DrosEU* dataset represent the standard deviation of  $\pi$  across all 48 population samples.



191 We next tested for associations between geographic variables and genome-wide average  
192 levels of genetic variation. We found that neither  $\pi$  nor  $\theta$  was correlated with latitude or  
193 longitude, but both strongly decreased with altitude (Table 2). This contrasts with previous  
194 studies of flies collected from a broader range of altitudes, which found increased genetic  
195 diversity in high-elevation populations (Lian *et al.* 2018). Finally, we tested for a correlation  
196 between genome-wide variation and the season of collection, finding no relationship  
197 (Table 2). Together, these results suggest that there is little spatio-temporal variation  
198 among European populations in overall levels of sequence variability.

199

200 For all populations, the ratio of X-linked to autosomal variation ( $\pi_X/\pi_A$ ) was well below the  
201 value of 0.75 expected under neutrality with equal sex ratios (ranging from 0.53 to 0.66,  
202 one-sample Wilcoxon rank test,  $p < 0.001$ ). These estimates are broadly consistent with  
203 those from previous studies of European and other non-African populations (e.g.  
204 Andolfatto 2001; Kauer *et al.* 2002; Hutter *et al.* 2007; Betancourt *et al.* 2004; Mackay *et*  
205 *al.* 2012; Langley *et al.* 2012). Surprisingly, the  $\pi_X/\pi_A$  ratio increased significantly,  
206 significantly, albeit weakly, with latitude (Spearman's  $\rho = 0.315$ ,  $p = 0.0289$ ). This  
207 observation is at odds with the predictions of a simple model of periodic bottlenecks  
208 leading to a lower X/A ratio in northern populations (Hutter *et al.* 2007; Pool & Nielsen  
209 2007), but might be consistent with stronger selection or more male-biased sex-ratios in  
210 the south as compared to the north (Charlesworth 2001; Hutter *et al.* 2007).

211

212 Genetic variation was heterogeneous across the genome, as has been previously reported  
213 (Begun & Aquadro 1992; Mackay *et al.* 2012; Langley *et al.* 2012; Huang *et al.* 2014). Both  
214  $\pi$  and  $\theta$  were markedly reduced close to centromeric and telomeric regions (Figure 3), and  
215 strongly positively correlated with recombination rate (linear regression against fine-scale

216 recombination rate estimates from Comeron *et al.* (2012),  $p < 0.001$ ; not accounting for  
 217 autocorrelation; Table S3). Recombination rate explained 41–47% and 31–38% of the  
 218 variation in  $\pi$ , for the autosomes and X chromosome, respectively. Using broad-scale  
 219 recombination rate estimates (Fiston-Lavier *et al.* 2010) yielded a qualitatively similar, but  
 220 slightly stronger correlation in autosomes and weaker in the X chromosome (Figure 3,  
 221 Table S3, Figure 3 - figure supplement 1).

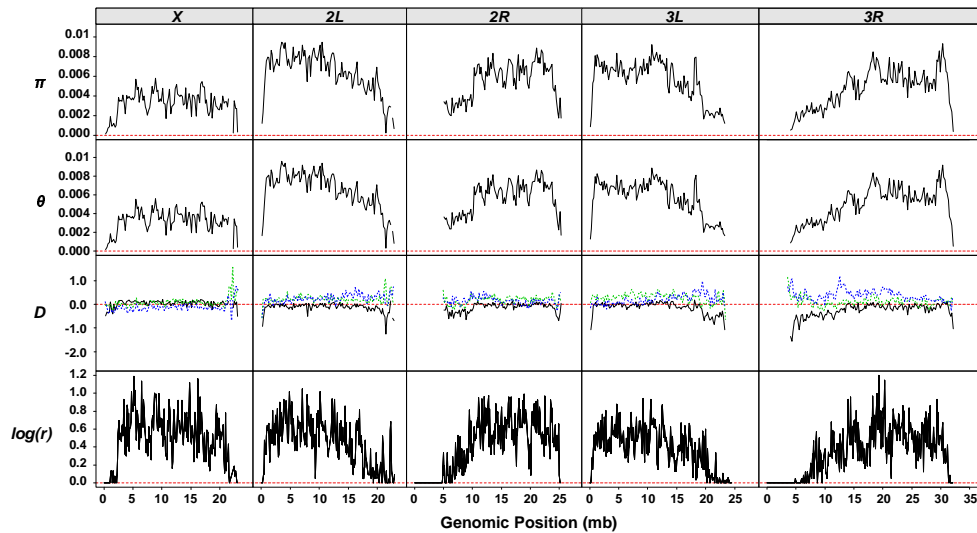

222

223 **Figure 3 with 1 supplement. Genome-wide estimates of genetic diversity and recombination rates.** The distribution  
 224 of Tajima's  $\pi$ , Watterson's  $\theta$  and Tajima's  $D$  (from top to bottom) in 200 kb non-overlapping windows plotted for each  
 225 chromosomal arm separately. The dashed blue and green lines show estimates for 14 individuals from Rwanda and  
 226 Zambia, respectively. Bold black lines depict statistics, that were averaged across all 48 samples and the upper and  
 227 lower grey areas show the corresponding standard deviations for each window. Red dashed lines highlight the vertical  
 228 position of a zero value. The bottom row shows log-transformed recombination rates ( $r$ ) in 100 kb non-overlapping  
 229 windows as obtained from Comeron *et al.* (2010).

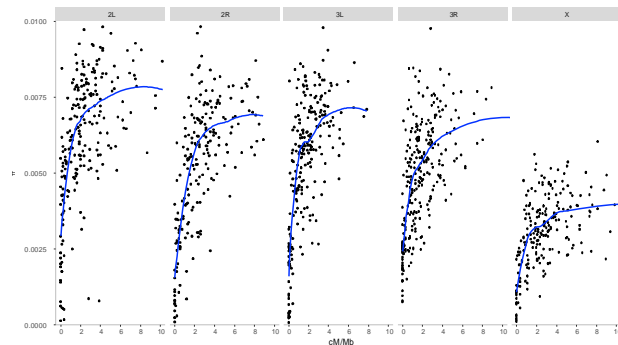

230  
 231  
 232  
 233  
 234

**Figure 3 - figure supplement 1. Correlation between recombination and genetic diversity.** Smooth local regression (LOESS) between recombination rate in cM/Mb (Comeron *et al.* 2012) and the average of the 48 samples' genetic diversity ( $\pi$ ) in 100 kb non-overlapping windows by chromosome arm.

235 In contrast to  $\pi$  and  $\theta$ , the European populations showed major differences in mean  
236 Tajima's  $D$  (Table S1). Tajima's  $D$  measures deviations from neutral expectations in allele  
237 frequencies, which can be due either to selection or complex demography, with negative  $D$   
238 indicating an excess of low-frequency variants (Tajima 1983). Approximately half of the  
239 European samples have negative  $D$ , It is possible that this result is artefactual, caused by  
240 heterogeneity in the proportion of sequencing errors among multiplexed sequencing runs.  
241 However, this is unlikely, because including sequence run as a covariate in the statistical  
242 model did not improve its fit (Supplementary File 2; Table S4). In all of these analyses, we  
243 controlled for confounding effects of spatio-temporal autocorrelations between samples by  
244 accounting for similarity among spatial neighbors (Moran's  $I \approx 0$ ,  $p > 0.05$  for all tests).  
245 When comparing  $D$  in European samples with ancestral African populations from Zambia  
246 and Rwanda, the values were generally lower in the European populations, possibly due to  
247 the recent range and population size expansion (Figure 3 and Table S5). Similar to genetic  
248 diversity,  $D$  was also heterogeneous across the genome. Tajima's  $D$  was broadly reduced  
249 in the vicinity of telomeric and centromeric regions, possibly reflecting extended purifying  
250 selection or selective sweeps close to heterochromatic regions, and due to reduced  
251 recombination.

252

### 253 **Several genomic regions show signatures of continent-wide selective sweeps**

254 Genomic regions that show localized reductions in Tajima's  $D$  are attractive candidates for  
255 having undergone recent selective sweeps. To identify such genomic regions, we used  
256 *Pool-hmm* (Boitard *et al.* 2013; Table S6A), which – like Tajima's  $D$  – identifies candidate  
257 sweep regions *via* distortions in the allele frequency spectrum. Several genomic regions  
258 identified in this way coincide with previously identified, well-supported sweeps in the  
259 proximity of *Hen1* (Kolaczkowski *et al.* 2011b), *Cyp6g1* (Daborn *et al.* 2002), *wapl*

260 (Beisswanger *et al.* 2006), and around the chimeric gene *CR18217* (Rogers & Hartl 2012),  
261 among others (Table S6B). These regions also showed local reductions in Tajima's *D* and  
262 genetic variation, again consistent with selection (Figure 4 and Figure 4-figure supplement  
263 1 and 2). The putative sweep regions included 145 of the 232 genes previously identified  
264 using *Pool-hmm* in an Austrian population (Boitard *et al.* 2012; Table S6C). Other regions  
265 identified have not previously been described as harboring sweeps; these represent  
266 potential novel targets of positive selection deserving of further investigation (Table S6A).  
267 Overall, we identified 64 genes that showed signatures of selection across all European  
268 populations analysed (Table S6D); thirty-five of them were located in regions with low  
269 Tajima's *D*. This pattern suggests the existence of continent-wide sweeps that either  
270 predate the colonization of Europe (e.g., Beisswanger *et al.* 2006), or that have swept  
271 across the majority of European populations more recently (Table S6D). Finally, we  
272 classified the populations according to the Köppen-Geiger climate classification (Peel *et al.*  
273 2007) and identified several candidate sweeps exclusive to arid, temperate or cold  
274 regions; Table S6A). For temperate climates, candidate sweep regions were enriched for  
275 functions such as 'response to stimulus', 'transport', and 'nervous system development';  
276 for cold climates, they were enriched for 'vitamin and co-factor metabolic processes'  
277 (Table S6E). In contrast, we did not find any significant GO enrichment for arid candidate  
278 sweep regions. In summary, this dataset represents a rich genomic resource for future in-  
279 depth studies of selective sweeps and adaptation to different climates in *Drosophila*.

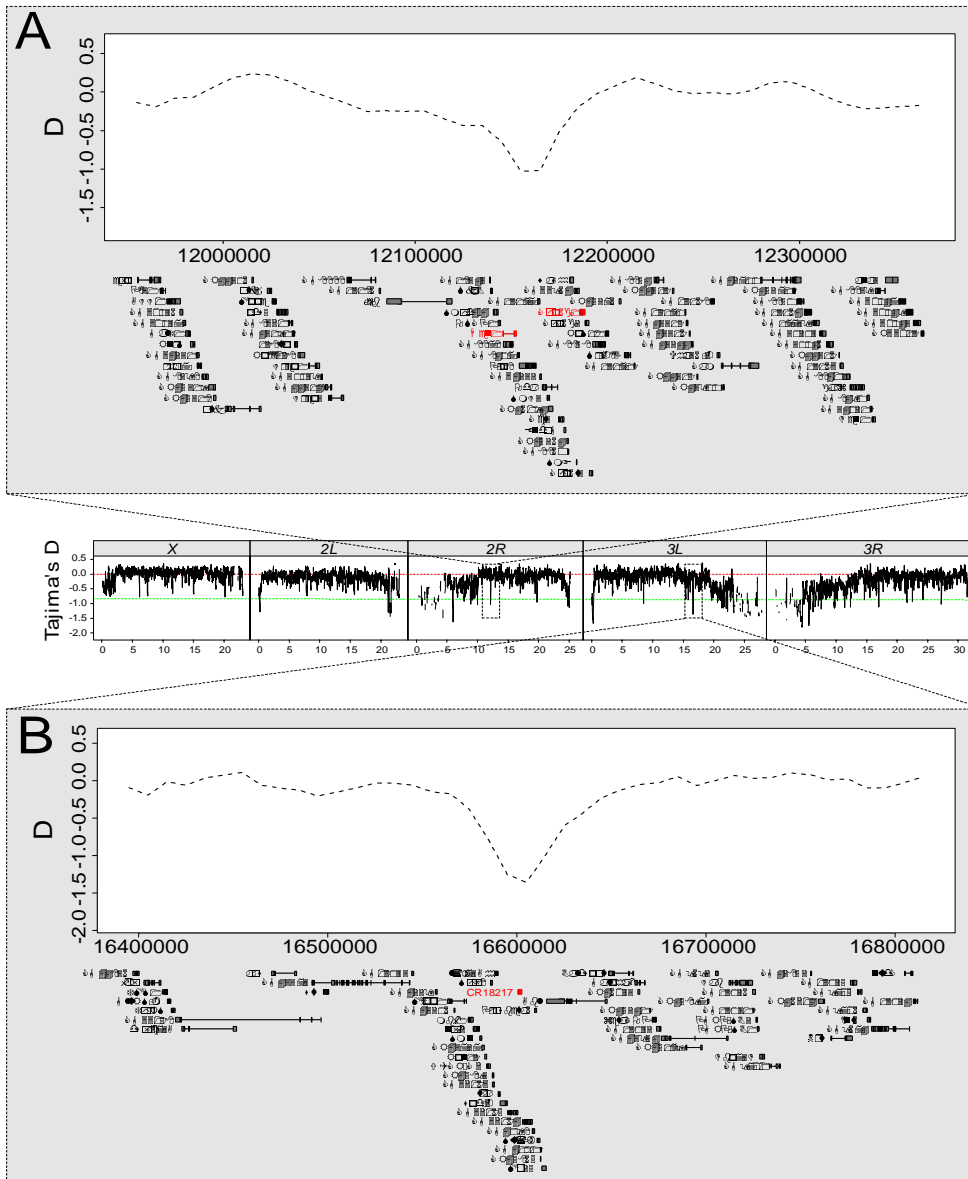

280

281 **Figure 4 with 2 supplements. Signals of selective sweeps.** The central panel shows the distribution of Tajima's  $D$  in 50  
282 kb sliding windows with 40 kb overlap, with red and green dashed lines indicating Tajima's  $D = 0$  and  $-1$ , respectively.  
283 The top panel shows a detail of a genomic region on chromosomal arm 2R in the vicinity of *Cyp6g1* and *Hen1*  
284 (highlighted in red), genes reportedly involved in pesticide resistance. This strong sweep signal is characterized by an  
285 excess of low-frequency SNP variants and overall negative Tajima's  $D$  in all samples. Coloured solid lines depict  
286 Tajima's  $D$  for each sample (see SI Figure 4 for color codes); the black dashed line shows Tajima's  $D$  averaged across  
287 all samples. The bottom panel shows a region on 3L previously identified as a potential target of selection, which shows  
288 a similar strong sweep signature. Notably, both regions show strongly reduced genetic variation (Figure 4 - figure  
289 supplement 1).

290

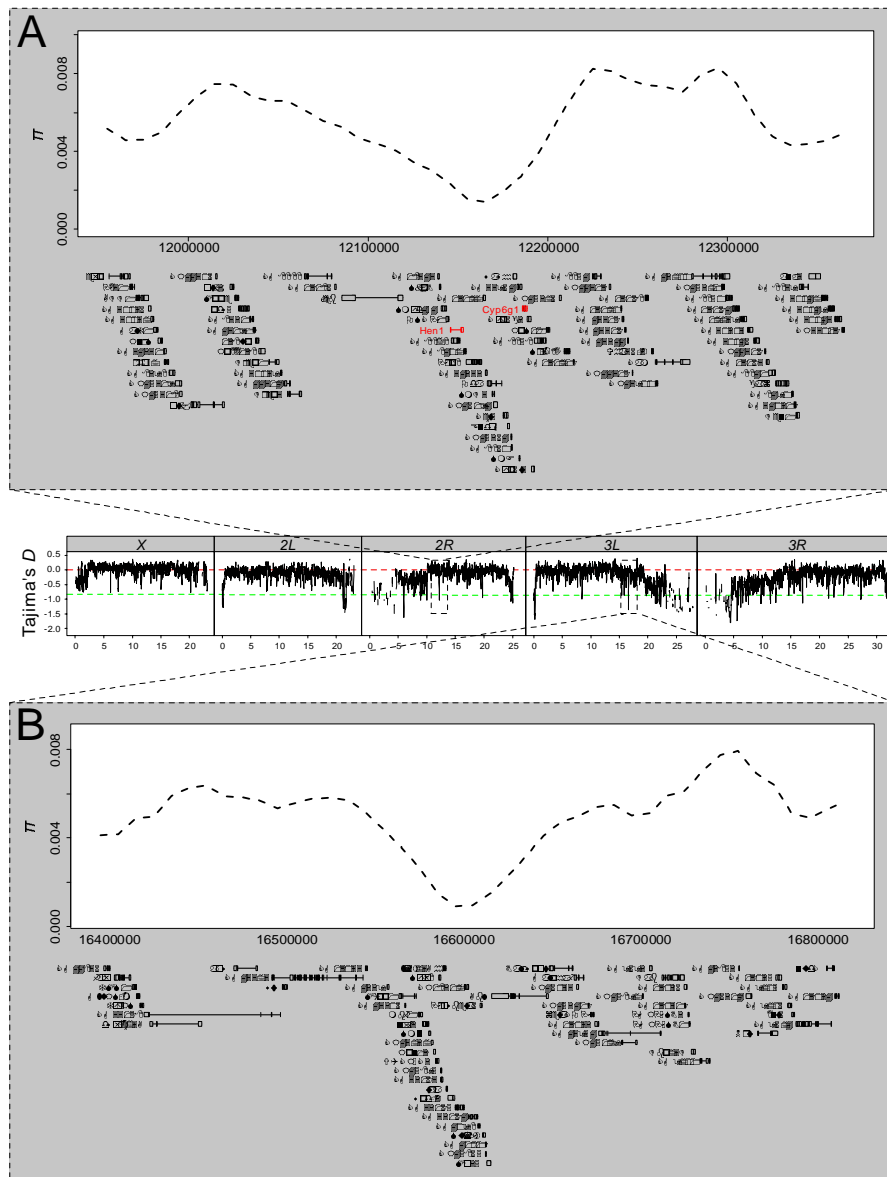

291

292 **Figure 4 - figure supplement 1: Genetic variation in regions of putative selective sweeps.** This figure is equivalent  
293 to Figure 4 in the main text but shows the distribution of genetic variation ( $\pi$ ) in regions with depressed Tajima's  $D$   
294 around the well-studied *Cyp6g1* locus (A) and around a previously known candidate region on 3L (B). Similar to Tajima's  
295  $D$ ,  $\pi$  was calculated in 50 kb sliding windows with 40 kb overlap. See Table S6 for more examples. A legend for the color  
296 codes of the samples can be found in Figure 4 - figure supplement 2.

|              |              |               |
|--------------|--------------|---------------|
| AT_14_Mau_1  | UA_14_Ode_19 | ES_14_Lle_35  |
| AT_14_Mau_2  | UA_14_Ode_20 | FI_14_Aka_36  |
| TR_14_Yes_3  | UA_14_Ode_21 | FI_14_Aka_37  |
| TR_14_Yes_4  | UA_14_Ode_22 | FI_14_Ves_38  |
| FR_14_Vil_5  | UA_14_Kyi_23 | DK_14_Kar_39  |
| FR_14_Vil_7  | UA_14_Kyi_24 | DK_14_Kar_41  |
| FR_14_Got_8  | UA_14_Var_25 | CH_14_Cha_42  |
| UK_14_She_9  | UA_14_Pyr_26 | CH_14_Cha_43  |
| UK_14_Sou_10 | UA_14_Dro_27 | AT_14_See_44  |
| CY_14_Nic_11 | UA_14_Cho_28 | UA_14_Kha_45  |
| UK_14_Mar_12 | UA_14_Cho_29 | UA_14_Kha_46  |
| UK_14_Lut_13 | SE_14_Lun_30 | UA_14_Cho_47  |
| DE_14_Bro_14 | DE_14_Mun_31 | UA_14_Cho_48  |
| DE_14_Bro_15 | DE_14_Mun_32 | UA_14_Kyi_49  |
| UA_14_Yal_16 | PT_14_Rec_33 | UA_14_Uma_50  |
| UA_14_Yal_18 | ES_14_Lle_34 | RU_14_Vald_51 |

297  
298

**Figure 4 - figure supplement 2.** Legend for color code in Figure 4, Figure 4 - figure supplement 1.

299

### 300 **European populations are structured along an east-west gradient**

301 We next investigated patterns of genetic differentiation due to demographic substructure.

302 Overall, pairwise differentiation as measured by  $F_{ST}$  was relatively low, particularly for the

303 autosomes (autosomal  $F_{ST}$  0.013–0.059; X-chromosome  $F_{ST}$ : 0.043–0.076; Mann-

304 Whitney-U test;  $p < 0.001$ ; Table S1). The slightly elevated  $F_{ST}$  for the X chromosome is

305 expected given its smaller effective population size (Hutter *et al.* 2007). One population,

306 from Sheffield (UK), was unusually differentiated from the others (Table S1) and was

307 excluded from analyses of neutral genetic differentiation. Despite overall low levels of

308 among-population differentiation, European populations showed evidence of geographic

309 substructure. To analyse this pattern in detail, we focused on SNPs most likely to reflect

310 neutral population structure, those at 4-fold degenerate sites, in regions outside those

311 showing signatures of selective sweeps, in regions of high recombination ( $r > 3\text{cM}/\text{Mb}$ ;

312 Comeron *et al.* 2011) and at least 1 Mb away from the breakpoints of common inversions.

313 The final filtered data set consisted of 8,727 SNPs. Within Europe, we found a weak but  
314 significant pattern of isolation by distance (IBD). That is, pairwise  $F_{ST}$ , though low overall,  
315 increased significantly with geographic distance (Mantel test;  $p < 0.001$ ;  $r=0.65$ , max.  $F_{ST} \sim$   
316 0.05; Figure 5A and Figure 5A – figure supplement 1A).  
317

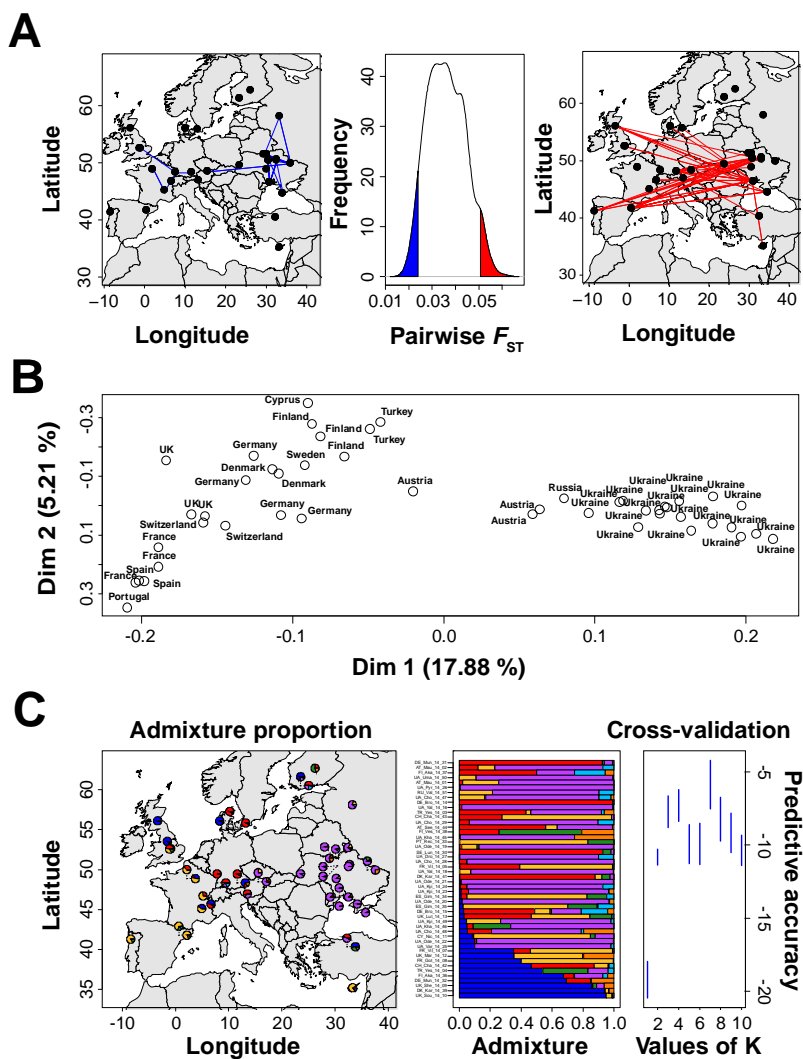

318

319 **Figure 5 with 1 supplement. Genetic differentiation among European populations.** (A) Average  $F_{ST}$  among  
320 populations at putatively neutral sites. The centre plot shows the distribution of  $F_{ST}$  values for all 1,128 pairwise  
321 population comparisons, with the  $F_{ST}$  values for each comparison obtained from the mean across all 8,727 SNPs used in  
322 the analysis. Plots on the left and the right show population pairs in the lower (blue) and upper (red) 5% tails of the  $F_{ST}$   
323 distribution. (B) PCA analysis of allele frequencies at the same SNPs reveals population substructuring in Europe.  
324 Hierarchical model fitting using the first four PCs showed that the populations fell into three clusters (indicated by colour),  
325 with cluster assignment of each population subsequently estimated by  $k$ -means clustering. (C) Admixture proportions for  
326 each population inferred by model-based clustering with *ConStruct* are highlighted as pie charts (left plot) or Structure  
327 plots (centre). The optimal number of 7 spatial layers ( $K$ ) was inferred by cross-validation (right plot).



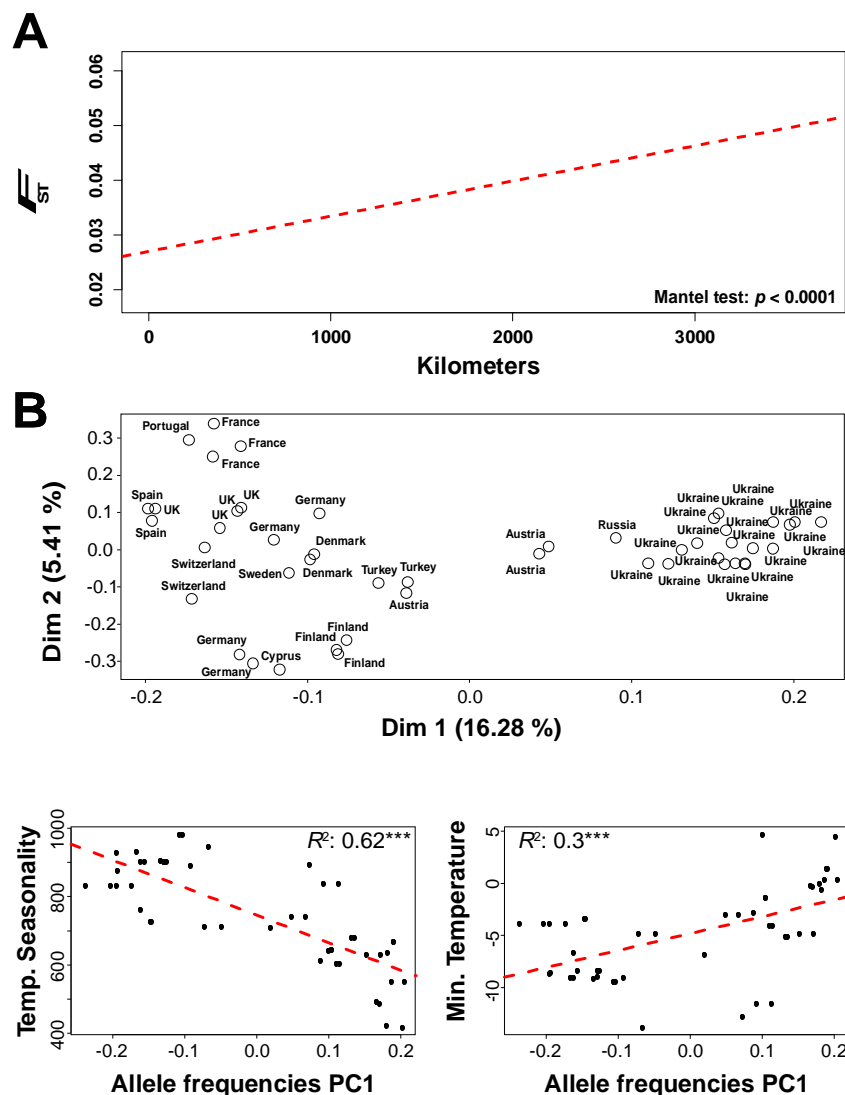

328

329 **Figure 5 - figure supplement 1:** Genetic differentiation among European populations. (A) Average  $F_{ST}$  for 8,727  
330 putatively neutral SNPs is significantly negatively correlated with geographic distance (red dashed line shows the linear  
331 regression) (B) PCA-based inference of population structure similar to Figure 5B in the main text, but based on 20,008  
332 SNPs located in short introns (<60bp). (C) We tested the top 5 PC for significant associations with 8 climatic variables  
333 obtained from the WorldClim database; the two significant regressions, between PC1 and Temperature seasonality  
334 (WorldClim Biovar 4; left) and between PC1 and minimum temperature of the coldest month (WorldClim Biovar 6; right)  
335 are shown.

336

337 We investigated population substructure using principal components analysis (PCA) on  
338 allele frequencies from the same set of SNPs at 4-fold degenerate sites. The first three PC  
339 axes explained >25% of the total variance (PC1: 17.88%, PC2: 5.2%, PC3: 4.7%,  
340 eigenvalues = 410, 101, and 92, respectively), with PC1 strongly correlated with longitude

341 and to a lesser extent with altitude (Table 2). This longitudinal stratification is expected  
342 under a simple model of IBD, as the continent extends further in longitude than latitude. As  
343 there was significant spatial autocorrelation between samples (as indicated by Moran's  
344 test on residuals from linear regressions with PC1), we repeated the analysis with an  
345 explicit spatial error model; the association between PC1 and longitude remained  
346 significant. Like PC1, PC2 is correlated with longitude and altitude. PC3, by contrast, is not  
347 associated with any variable examined (Table 2). No major PC axes were correlated with  
348 season, indicating that there were no shared seasonal differences across samples in our  
349 data. However, based on linear regressions comparing summer and fall values of PC1  
350 (adjusted  $R^2$ : 0.98;  $p$ -value < 0.001), PC2 ( $R^2$ : 0.79;  $p$ -value < 0.001) and PC3 ( $R^2$ : 0.93;  $p$ -  
351 value < 0.001), we found very strong associations of genetic variation across seasons in  
352 the 10 locations that were sampled in summer and fall. This indicates a high degree of  
353 spatio-temporal stability in the levels of genetic variation.

354

355 Hierarchical model fitting based on the first three PC axes resulted in three distinct clusters  
356 (Figure 5B) separated along PC1, supporting the notion of strong longitudinal  
357 differentiation among European populations. Importantly, these results remain qualitatively  
358 unchanged when restricting the analysis to SNPs located in short introns (< 60 bp), which  
359 are also assumed to be relatively unaffected by selection (Figure 5 – figure supplement  
360 1B; Haddrill *et al.* 2005; Singh *et al.* 2009; Parsch *et al.* 2010; Clemente & Vogl 2012;  
361 Lawrie *et al.* 2013).

362

363 Model-based spatial clustering showed qualitatively similar results, with populations  
364 separated mainly by longitude (Figure 5C; using ConStruct, with  $K=7$  spatial layers chosen  
365 based on model selection procedure *via* cross-validation). We could also infer levels of

366 admixture among populations from this analysis; population samples from eastern and  
367 northwestern Europe showed low levels of admixture, while those from central Europe  
368 appeared locally well-mixed (Figure 5C).

369

370 In addition to restricted gene flow between geographic areas, local adaptation may explain  
371 population substructuring, even at neutral sites, if closely related populations tend to  
372 respond to similar selective pressures. We thus probed whether this spatial substructuring  
373 is associated with any of nineteen climatic variables, obtained from the WorldClim  
374 database (Hijmans *et al.* 2005). These climatic variables represent averages interpolated  
375 averages across more than 50 years of observation at the geographic coordinates  
376 corresponding to our sampling locations. Only two variables are significant after Bonferroni  
377 correction (adjusted  $\alpha = 0.0026$ ): between PC1 and ‘temperature seasonality’ (BioVar 4;  
378 Hijmans *et al.* 2005;  $R^2 = 0.62$ ,  $P < 0.001$ ; Figure 5 – figure supplement 1C) and between  
379 PC1 and ‘minimum temperature of the coldest month’ ( $R^2 = 0.3$ ,  $P < 0.001$ ; Figure 5 – figure  
380 supplement 1C). This suggests that the pronounced longitudinal differentiation along the  
381 European continent could at least partly be driven by the transition from oceanic to  
382 continental climate, leading to gradual changes in temperature seasonality and the  
383 severity of winter conditions which might impact demography, especially local survival. To  
384 the best of our knowledge, such strongly pronounced longitudinal structure and  
385 differentiation on a continent-wide scale has not yet been reported for *D. melanogaster*.

386

### 387 **Mitochondrial haplotypes also exhibit longitudinal population structure**

388 Our finding that European populations show strong longitudinal structure is also supported  
389 by an analysis of mitochondrial haplotypes. We identified two main mitochondrial  
390 haplotypes in Europe, separated by 41 mutations (G1.2 and G2.1; Figure 6A), with highly

391 variable frequencies among populations (Figure 6B). Qualitatively, three types of  
 392 European populations can be distinguished based on these haplotypes: (1) central  
 393 European populations with a high frequency (> 60%) of the G1 haplotypes, (2) Eastern  
 394 European populations in summer, with a low frequency (< 40%) of G1 haplotypes, and (3)  
 395 Iberian and Eastern European populations in fall, with a combined frequency of G1  
 396 haplotypes between 40-60% (Figure 6 - figure supplement 1A). These results are  
 397 consistent with analyses of mitochondrial haplotypes from a North American population  
 398 (Cooper *et al.* 2015) as well as from worldwide samples (Wolff *et al.* 2016), which revealed  
 399 a high level of haplotype diversity.

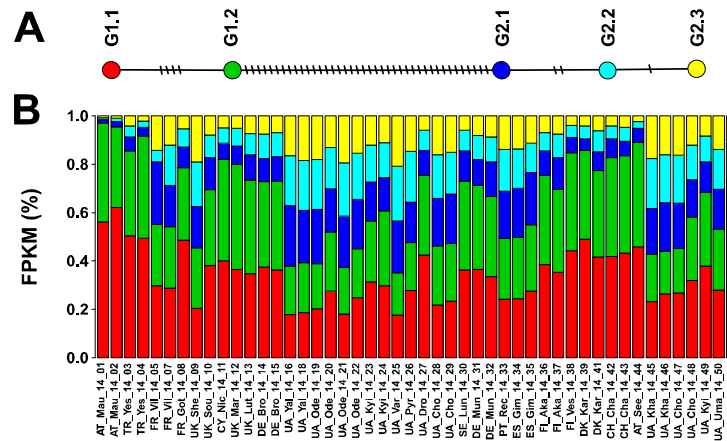

400

401 **Figure 6 with 1 supplement. Mitochondrial haplotypes.** (A) TCS network showing the relationship of 5 common  
 402 mitochondrial haplotypes; (B) estimated frequency of each mitochondrial haplotype in 48 European samples.

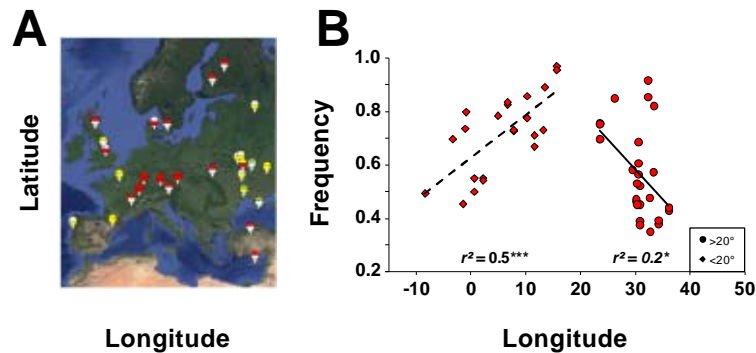

403

404 **Figure 6 - figure supplement 1. Mitochondrial haplotypes.** (A) Graphical summary of the combined frequency of G1

405 haplotypes in Europe. Summer and Fall are represented at the top and bottom of the circles, respectively. White – no  
406 information; green, yellow and red represent a combined frequency of G1 haplotypes lower than 40%, in between 40%  
407 and 60% and higher than 60%, respectively. (B) Correlations between the combined frequency of G1 haplotypes and  
408 longitude (red diamonds for western populations below 20° and red circles for eastern populations above 20°).

409

410 Mitochondrial haplotypes also showed shifts in the relative frequencies of the two  
411 haplotype classes between summer and fall, but only in 2 of 9 possible comparisons.  
412 While there was no correlation between latitude and the frequency of G1 haplotypes, we  
413 found a weak but significant negative correlation between G1 haplotypes and longitude ( $r^2$   
414 = 0.10;  $p < 0.05$ ), consistent with the longitudinal east-west population structure observed  
415 for SNPs at 4-fold degenerate sites. In a subsequent analysis, we divided the dataset at  
416 20° longitude into an eastern and a western subset because in northern Europe 20°  
417 longitude corresponds to the division of two major climatic zones, temperate and cold  
418 (Peel *et al.* 2007). This split revealed a clear correlation between longitude and the  
419 combined frequency of G1 haplotypes, explaining as much as 50% of the variation in the  
420 western group (Figure 6 - figure supplement 1B). Similarly, in eastern populations,  
421 longitude and the combined frequency of G1 haplotypes were correlated, explaining  
422 approximately 20% of the variance (Figure 6 - figure supplement 1B). Thus, these data on  
423 mitochondrial haplotypes clearly confirm the pronounced east-west structure and  
424 differentiation among European populations of *D. melanogaster*.

425

#### 426 **The frequency of polymorphic TEs varies with longitude and altitude**

427 To examine the population genetics of structural variants, we first focused on transposable  
428 elements (TEs). The repetitive content of the 48 samples ranged from 16% to 21% with  
429 respect to nuclear genome size (Figure 7). The vast majority of detected repeats were  
430 TEs, mostly represented by long terminal repeats (LTR) and long interspersed nuclear  
431 elements (LINE), as well as a few DNA elements (Class II). LTRs best explained total TE

432 content (LINE+LTR+DNA) (Pearson's  $r = 0.87$ ,  $p < 0.01$ , vs. DNA  $r = 0.58$ ,  $p = 0.0117$ , and  
 433 LINE  $r = 0.36$ ,  $p < 0.01$  and Figure 7- figure supplement 1A).

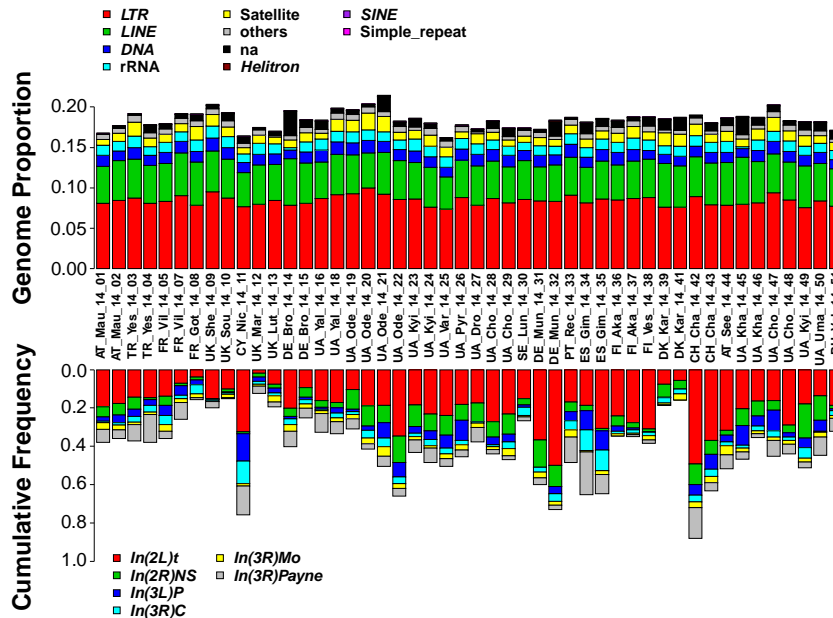

434

435 **Figure 7 with 2 supplements. Geographic patterns in structural variants.** The upper panel shows stacked bar plots  
 436 with the relative abundances of TEs in all 48 population samples. The proportion of each repeat class was estimated  
 437 from sampled reads with dnaPipeTE (2 samples per run, 0.1X coverage per sample). The lower panel shows stacked  
 438 bar plots depicting absolute frequencies of six cosmopolitan inversions in all 48 population samples.

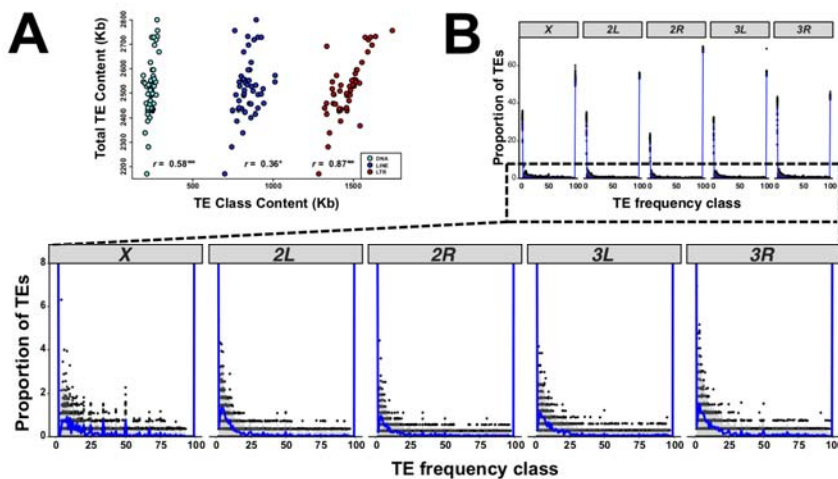

439

440 **Figure 7- figure supplement 1. Transposable Elements genome content and frequency distributions.** (A)  
 441 Pearson's correlations between each main TE class (LTR, LINE and DNA) and the total TE content of each pool  
 442 (LTR+LINE+DNA) in kb. (B) The site frequency spectrum of TE frequencies per chromosome arm. Each dot represents  
 443 the proportion of TEs in each bin per sample and a smoother geometric line had been added to highlight the trend.  
 444 Lower panel is a zoom in of the above panel.

445 We next estimated population frequencies of 1,630 TE insertions annotated in the *D.*  
446 *melanogaster* reference genome v.6.04 using *T-lex2* (Table S7, Fiston-Lavier *et al.* 2015).  
447 On average, 56% of the TEs annotated in the reference genome were fixed in all samples.  
448 The majority of the remaining polymorphic TEs segregated at low frequency in all samples  
449 (Figure 7 - figure supplement 1A), potentially due to the effect of purifying selection  
450 (González *et al.* 2008; Petrov *et al.* 2011; Kofler *et al.* 2012; Cridland *et al.* 2013;  
451 Blumenstiel *et al.* 2014). However, we also observed 142 TE insertions present at  
452 intermediate (>10% and <95%) frequencies, which might be consistent with transposition-  
453 selection balance (Figure 7 - figure supplement 1B; Charlesworth *et al.* 1994).  
454  
455 In each of the 48 samples, TE frequency and recombination rate were negatively  
456 correlated on a genome-wide level (Spearman rank sum test;  $p < 0.01$ ), as previously  
457 reported (Bartolomé *et al.* 2002; Petrov *et al.* 2011; Kofler *et al.* 2012). This pattern still  
458 held when only polymorphic TEs (population frequency <95%) were analysed, although it  
459 was not statistically significant for some chromosomes and populations (Table S8). In  
460 either case, the correlation was more negative when using broad-scale (Fiston-Lavier *et al.*  
461 2010), rather than fine-scale (Comeron *et al.* 2012), recombination rate estimates,  
462 indicating that broad-scale recombination patterns may best capture long-term population  
463 recombination patterns (Materials and methods, Tables S8).  
464  
465 We further tested whether the distribution of TE frequencies among samples could be  
466 explained by geographical or temporal variables. We focused on the 141 TE insertions that  
467 showed frequency variability among samples (interquartile range, (IQR) > 10; see  
468 Materials and Methods) and were located in regions of non-zero recombination according  
469 to both fine-scale (Comeron *et al.* 2012), and broad-scale (Fiston-Lavier *et al.* (2010)

470 estimations. Of these, 57 TEs showed significant associations with geographical or  
471 temporal variables after multiple testing correction (Table S9). We found significant  
472 correlations of 13 TEs with longitude, 13 with altitude, five with latitude, and three with  
473 season (Table S9). In addition, the frequencies of the other 23 insertions were significantly  
474 correlated with more than one of the above-mentioned variables. These TEs were  
475 scattered along the five main chromosome arms, with the majority located inside genes  
476 (42 out of 57; Table S9).

477

478 Two TE families were enriched in the 57 TE dataset: the LTR 297 family with 11 copies,  
479 and the DNA *pogo* family with five copies ( $\chi^2$ -values after Yate's correction < 0.05; Table  
480 S10). Interestingly, 14 of these 57 TEs coincide with previously identified adaptive  
481 candidate TEs, suggesting that our dataset might be enriched for adaptive insertions,  
482 several of which seem to exhibit spatial frequency clines (Table S9; Rech *et al.* 2019).

483

#### 484 **Inversions exhibit latitudinal and longitudinal clines in Europe**

485 Another class of structural variants, chromosomal inversions, show spatial patterns in  
486 North American and Australian populations, potentially due to selection (reviewed in  
487 Kapun & Flatt 2019). In contrast to North America and Australia, inversion clines in Europe  
488 are poorly characterized (Lemeunier & Aulard 1992). Here, we examined the presence  
489 and frequency of six cosmopolitan inversions (*In(2L)t*, *In(2R)NS*, *In(3L)P*, *In(3R)C*,  
490 *In(3R)Mo*, *In(3R)Payne*) in our European samples, using a panel of inversion-specific  
491 marker SNPs (Kapun *et al.* 2014). All samples were polymorphic for one or more  
492 inversions (Figure 7). However, only *In(2L)t* segregated at substantial frequencies in most  
493 populations (average frequency = 20.2%); all other inversions were either absent or rare  
494 (average frequencies: *In(2R)NS* = 6.2%, *In(3L)P* = 4%, *In(3R)C* = 3.1%, *In(3R)Mo* = 2.2%,



495  $In(3R)Payne = 5.7\%$ .

496

497 Despite their overall low frequencies, several inversions exhibited pronounced clinality

498 (Table 3). In particular, we observed significant latitudinal clines for  $In(3L)P$ ,  $In(3R)C$  and

499  $In(3R)Payne$ . Although they differed in overall frequencies,  $In(3L)P$  and  $In(3R)Payne$

500 showed latitudinal clines in Europe qualitatively similar to clines previously observed along

501 the North American and Australian east coasts (Figure 7 - figure supplement 2 and Table

502 S11, Kapun *et al.* 2016a), which, at least in the case of  $In(3R)Payne$ , are maintained by

503 spatially varying selection (Kapun *et al.* 2016a,b; Durmaz *et al.* 2018; Anderson *et al.*

504 2005; Umina *et al.* 2005; Kennington *et al.* 2006; Rako *et al.* 2006).

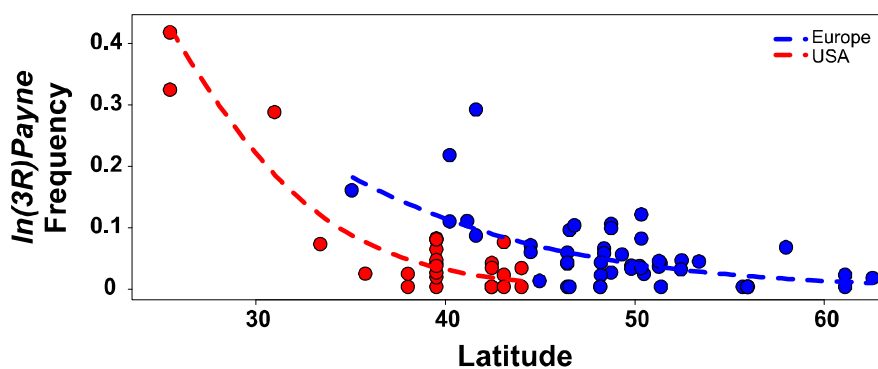

505

506 **Figure 7 - figure supplement 2. Clinal variation of the inversion  $In(3R)Payne$  across continents.** Parallel frequency  
507 clines of  $In(3R)Payne$  along the latitudinal axis at the North American east coast (red) and in Europe (blue) (see also  
508 Table S11).

509

510 We also detected – for the first time – longitudinal clines for  $In(2L)t$  and  $In(2R)NS$ , with

511 both polymorphisms decreasing in frequency from east to west, a result consistent with the

512 strong longitudinal population differentiation in Europe.  $In(2L)t$  also increased in frequency

513 with altitude (Table 3). Except for  $In(3R)C$ , we did not find significant residual spatio-

514 temporal autocorrelation among samples for any inversion tested (Moran's  $I \approx 0$ ,  $p > 0.05$

515 for all tests; Table 3), suggesting that our analysis was not confounded by spatial  
516 autocorrelation for most of the inversions. Further studies are necessary to determine the  
517 extent to which these clines of inversion frequencies in Europe are shaped by selection.

518

519 **European *Drosophila* microbiomes contain Entomophthora, trypanosomatids and**  
520 **unknown DNA viruses**

521 We examined the bacterial, fungal, protist, and viral microbiota associated with *D.*  
522 *melanogaster* using the Pool-Seq data. The microbiota can affect life history traits,  
523 immunity, hormonal physiology, and metabolic homeostasis of their fly hosts (e.g., Trinder  
524 *et al.* 2017; Martino *et al.* 2017).

525 We characterised the taxonomic origin of the non-*Drosophila* reads in our dataset using  
526 MGRAST, which identifies and counts short protein motifs ('features') within reads (Meyer  
527 *et al.* 2008). We examined 262 million reads in total and of these most were assigned to  
528 *Wolbachia* (mean 53.7%; Figure 8), a well-known endosymbiont of *Drosophila* (Werren *et*  
529 *al.* 2008). The abundance of *Wolbachia* protein features relative to other microbial protein  
530 features (relative abundance) varied strongly between samples, ranging from 8.8% in a  
531 sample from the UK to almost 100% in samples from Spain, Portugal, Turkey and Russia  
532 (Table S12). Similarly, *Wolbachia* loads varied 100-fold between samples, as estimated  
533 from the ratio of *Wolbachia* protein features to *Drosophila* protein features (Table S12).

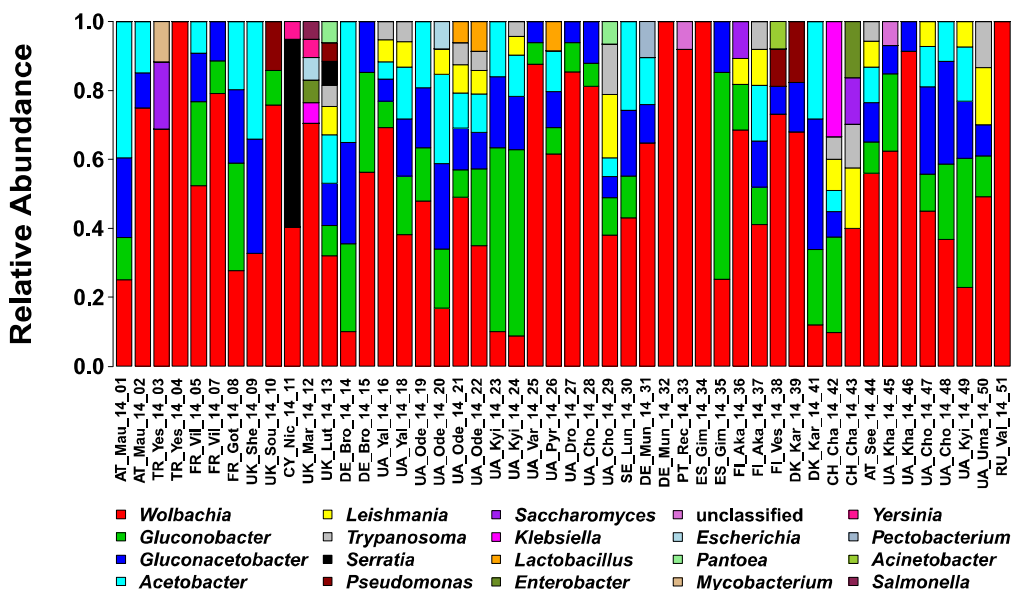

534

535 **Figure 8: Microbiome.** Relative abundance of *Drosophila*-associated microbes as assessed by MGRAST classified  
 536 shotgun sequences. Microbes had to reach at least 3% relative abundance in one of the samples to be represented

537

538 Acetic acid bacteria of the genera *Gluconobacter*, *Gluconacetobacter*, and *Acetobacter*

539 were the second largest group, with an average relative abundance of 34.4% among

540 microbial protein features. Furthermore, we found evidence for the presence of several

541 genera of Enterobacteria (*Serratia*, *Yersinia*, *Klebsiella*, *Pantoea*, *Escherichia*,

542 *Enterobacter*, *Salmonella*, and *Pectobacterium*). *Serratia* occurs only at low frequencies or

543 is absent from most of our samples, but reaches a very high relative abundance among

544 microbial protein features in the Nicosia (Cyprus) summer collection (54.5%). This high

545 relative abundance was accompanied by an 80x increase in *Serratia* bacterial load.

546

547 We also detected several eukaryotic microorganisms, although they were less abundant

548 than the bacteria. The fraction of fungal protein features, for example, is larger than 3% in

549 only three samples (from Finland, Austria and Turkey; Table S12). Among the eukaryotic

550 microbiota, we found trypanosomatids in 16 samples. Trypanosomatids have been

551 previously reported to be associated with *Drosophila* (Wilfert *et al.* 2011; Chandler &  
552 James 2013; Hamilton *et al.* 2015), and this appeared to have been confirmed in this first  
553 systematic survey across a wide geographic range in *D. melanogaster*. We also found the  
554 fungal pathogen *Entomophthora muscae* in 14 samples (Elya C *et al.* 2018).  
555 Somewhat surprisingly, we found few yeast sequences. Yeasts are commonly found on  
556 rotting fruit, the main food substrate of *D. melanogaster*, and have been found in  
557 association with *Drosophila* before (Barata *et al.* 2012; Chandler *et al.* 2012). This result  
558 suggests that, although yeasts can attract flies and play a role in food choice (Becher *et al.*  
559 2012; Buser *et al.* 2014), they might not be highly prevalent in or on *D. melanogaster*  
560 bodies but are rather actively digested and thus not part of the microbiome.  
561  
562 Our data also allowed us to identify DNA viruses. Only one DNA virus has been previously  
563 described for *D. melanogaster* (*Kallithea* virus; Webster *et al.* 2015; Palmer *et al.* 2018)  
564 and only two others more from other Drosophilid species (*Drosophila innubila* Nudivirus  
565 [Unckless 2011], Invertebrate Iridovirus 31 in *D. obscura* and *D. immigrans* [Webster *et al.*  
566 2016]).  
567 Here, we found six different DNA viruses, five of which are new (Table S13).  
568 Approximately two million reads came from *Kallithea* nudivirus (Webster *et al.* 2015),  
569 allowing us to assemble the first complete *Kallithea* genome (>300-fold coverage in the  
570 Ukrainian sample UA\_Kha\_14\_46; Genbank accession KX130344). We also identified  
571 around 1,000 reads from a novel nudivirus closely related to both *Kallithea* virus and to  
572 *Drosophila innubila* nudivirus (Unckless 2011) in sample DK\_Kar\_14\_41 from  
573 Karensminde, Denmark (Table S13). As the reads from this virus in our data set were  
574 insufficient to assemble the genome, we identified a publicly available dataset  
575 (SRR3939042: 27 male *D. melanogaster* from Esparto, California; Machado *et al.* 2016)

576 with sufficient reads to complete the genome (provisionally named “*Esparto Virus*”;  
577 KY608910).

578 We further identified two novel Densoviruses (*Parvoviridae*). The first is a relative of *Culex*  
579 *pipiens* densovirus, provisionally named “*Viltain virus*”, found at 94-fold coverage in  
580 sample FR\_Vil\_14\_07 (Viltain; KX648535). The second is “*Linvill Road virus*”, a relative of  
581 *Dendrolimus punctatus* densovirus, represented by only 300 reads here, but with high  
582 coverage in dataset SRR2396966 from a North American sample of *D. simulans*  
583 (KX648536; Machado *et al.* 2016). In addition, we detected a novel member of the  
584 *Bidnaviridae* family, “*Vesanto virus*”, a bidensovirus related to *Bombyx mori* densovirus 3  
585 with approximately 900-fold coverage in sample FI\_Ves\_14\_38 (Vesanto; KX648533 and  
586 KX648534). Finally, in one sample (UA\_Yal\_14\_16) we detected a substantial number of  
587 reads from an Entomopox-like virus, which we were unable to fully assemble (Table S13).  
588 Using a detection threshold of >0.1% of the *Drosophila* genome copy number, the most  
589 commonly detected viruses were *Kallithea virus* (30/48 of the pools) and *Vesanto virus*  
590 (25/48), followed by *Linvill Road virus* (7/48) and *Viltain virus* (5/48), with *Esparto virus*  
591 being the rarest (2/48).

592

## 593 **Discussion**

594 In recent years, large-scale population re-sequencing projects have produced major  
595 insights into the biology of both model (Mackay *et al.* 2012; Langley *et al.* 2012; Auton *et*  
596 *al.* 2015; Lack *et al.* 2015; Alonso-Blanco *et al.* 2016; Lack *et al.* 2016) and non-model  
597 organisms (e.g., Hohenlohe *et al.* 2010; Wolf *et al.* 2010). In particular, such massive  
598 datasets contribute greatly to our growing understanding of the processes that create and  
599 maintain genetic variation in natural populations. However, the relevant spatio-temporal

600 scales for population genomic analyses remain largely unknown (e.g., Guirao-Rico and  
601 González 2019). Here we have applied – for the first time – a continent-wide sampling and  
602 sequencing strategy to European populations of *D. melanogaster* (Figure 1), allowing us to  
603 uncover previously unknown aspects of this species' population biology and evolutionary  
604 genetics. This is particularly important because the population genomics of this species in  
605 Europe has been poorly characterized to date.

606

607 We find that European *D. melanogaster* populations exhibit pronounced longitudinal  
608 differentiation. We observed this pattern for a genome-wide set of SNPs at 4-fold  
609 degenerate sites, which presumably evolve neutrally (Figure 5), as well as for  
610 mitochondrial haplotypes, inversions and TEs which might be subject to spatially varying  
611 selection (Figure 6 and 7). Longitudinal differentiation might be due to the transition from  
612 oceanic to continental climate along the longitudinal axis (Figure 5-Figure 5 supplement 1).  
613 While spatial differences in climatic conditions likely play a major role in driving this  
614 pattern, we note that it is remarkably similar to that observed for human populations (e.g.,  
615 Cavalli-Sforza 1966; Xiao et al. 2004; Francalacci & Sanna 2008; Novembre *et al.* 2008).  
616 Indeed, east-west structure has been previously found in sub-Saharan Africa populations  
617 of *D. melanogaster*, with the split between eastern and western African populations having  
618 occurred ~70 kya ago (Michalakis & Veuille 1996; Aulard *et al.* 2002; Kapopoulou *et al.*  
619 2018b), a period that – interestingly – coincides with a wave of human migration from  
620 eastern into western Africa (Nielsen *et al.* 2017). However, in contrast to the pronounced  
621 pattern observed in Europe, African east-west structure is relatively weak, explaining only  
622 ~2.7% of variation, and is due to an inversion whose frequency varies longitudinally. In  
623 contrast, our demographic analyses are based on SNPs located in >1 Mb distance from  
624 the breakpoints of the most common inversions. This makes it very unlikely that the strong

625 longitudinal pattern we have observed is driven by inversions.

626

627 Spatial patterns of differentiation were stronger for longitude than for latitude. In contrast,  
628 differentiation in North America has mainly been observed across latitude, for both neutral  
629 and adaptive polymorphisms (e.g., Machado *et al.* 2016; Kapun *et al.* 2016a; reviewed in  
630 Adrion *et al.* 2015). Although our present analysis showed that putatively neutral SNPs  
631 were primarily differentiated along longitude, latitudinal clines may still exist for adaptive  
632 polymorphisms. In fact, we detected latitudinal frequency clines for both inversions and  
633 TEs (Table 3 and Table S9). For the inversions *In(3L)P* and *In(3R)Payne*, the observed  
634 latitudinal clines were in qualitative agreement with parallel clines reported from North  
635 America and Australia, with the inversions decreasing in frequency as distance from the  
636 equator increases (Mettler *et al.* 1977; Knibb *et al.* 1981; Leumeunier & Aulard 1992;  
637 Fabian *et al.* 2012; Kapun *et al.* 2014; Rane *et al.* 2015; Kapun *et al.* 2016a). This pattern  
638 is widely thought to be a result of climate adaptation, with the inversions containing  
639 variants that make them better adapted to tropical or subtropical than to temperate, more  
640 seasonal climates (e.g., Kapun *et al.* 2016a). Several euchromatic TE insertions also  
641 showed geographic (or seasonal) patterns of variation (Table S9), indicating that they  
642 might play a role in local adaptation, particularly since many of them are located in regions  
643 where they might affect gene regulation. Further, 17 of them also show significant  
644 correlations with either geographical or temporal variables in North American populations  
645 (Lerat *et al.* 2019). Additionally, several inversions and TEs also exhibited longitudinal  
646 gradients.

647

648 We also examined signatures of selective sweeps in our data. Several of the identified  
649 regions have previously been reported as potential targets of positive selection (Figure 4,

650 Table S6B and SC). However, most of these sweeps were originally identified by analysing  
651 a small number of populations (e.g. Kolaczkowski *et al.* 2011b; Daborn *et al.* 2002; Rogers  
652 & Hartl 2012). Here, we identified 64 genes (including *wapl*, *CR18217*, and *mgl*) which  
653 showed clear signatures of selection and which were widespread across Europe, thus  
654 strengthening the case for their adaptive significance. In addition, we found several  
655 regions with evidence of hard sweeps, some of them showing evidence of local climatic  
656 adaptation (Table S6); these candidate regions represent a valuable resource for future  
657 analyses of adaptation in European *Drosophila*.

658

659 Finally, our continent-wide analysis of the microbiota suggests that natural populations of  
660 European *D. melanogaster* vary greatly in the composition and abundance of microbes  
661 and viruses over space and time. Recent work suggests that at least parts of this variation  
662 in microbiomes follows geographic patterns (Walters *et al.* 2018, Wang *et al.* 2019) and  
663 contribute to phenotypic differences and local adaptation among populations, especially  
664 given that there might be tight and presumably local co-evolutionary interactions between  
665 fly hosts and their endosymbionts (e.g., Haselkorn *et al.* 2009; Richardson *et al.* 2012;  
666 Staubach *et al.* 2013; Kriesner *et al.* 2016; Wang and Staubach 2018). Most notably, we  
667 discovered five new DNA viruses of *D. melanogaster*. Despite this species being host to a  
668 wide diversity of RNA viruses, we now have found that the DNA viruses of *D.*  
669 *melanogaster* are also widespread, for instance with *Kallithea* virus detected in most  
670 populations.

671

672 Our study demonstrates that sampling on a continent-wide scale and pooled sequencing  
673 of a large number of natural populations can reveal fundamental and novel aspects of  
674 population biology, even for a well-studied model species such as *D. melanogaster*. Our



675 extensive sampling was feasible only due to synergistic collaboration among many  
676 research groups. Our efforts in Europe are paralleled in North America by the *Dros-RTEC*  
677 consortium, with whom we are collaborating to compare population genomic data across  
678 continents. Together, we have sampled both continents annually since 2014; we aim to  
679 continue to sample and sequence European and North American *Drosophila* populations  
680 with increasing spatio-temporal resolution in future years. With these efforts we hope to  
681 provide a rich community resource for biologists interested in molecular population  
682 genetics and adaptation genomics.

683

## 684 **Materials and methods**

685 The 2014 *DrosEU* dataset represents the most comprehensive spatio-temporal sampling  
686 of European *D. melanogaster* populations to date (Table 1). It comprises 48 samples of *D.*  
687 *melanogaster* collected from 32 geographical locations across Europe at different time  
688 points in 2014 through a joint effort of 18 research groups. Collections were mostly  
689 performed with baited traps using a standardized protocol (see Supplementary File 2).  
690 From each collection, we pooled 33–40 wild-caught males. We used males as they are  
691 more easily distinguishable morphologically from similar species than females. Despite our  
692 precautions, we identified a low level of *D. simulans* contamination in our sequences; we  
693 computationally filtered these sequences from the data prior to further analysis (see  
694 below).

695

## 696 **DNA extraction, library preparation and sequencing**

697 We extracted DNA from each sample after homogenization with bead beating and  
698 standard phenol/chloroform extraction. A detailed extraction protocol can be found in the  
699 Supplementary File 2. In preparation for sequencing, 500 ng of DNA from each sample

700 was sheared with a *Covaris* instrument (Duty cycle 10, intensity 5, cycles/burst 200, time  
701 30). Library preparation was performed using *NEBNext Ultra DNA Lib Prep-24* and  
702 *NebNext Multiplex Oligos* for Illumina-24 following the manufacturer's instructions. Each  
703 sample was sequenced as a pool (Pool-Seq; Schlötterer *et al.* 2014), as paired-end  
704 fragments on a *Illumina NextSeq 500* sequencer at the Genomics Core Facility of Pompeu  
705 Fabra University. Samples were multiplexed in 5 batches of 10 samples, except for one  
706 batch of 8 samples (Table S1). Each multiplexed batch was sequenced on 4 lanes at ~50x  
707 raw coverage per sample. The read length was 151 bp, with a median insert size of 348 bp  
708 (range 209-454 bp). The data are available from NCBI Bioproject PRJNA388788.

709

#### 710 **Mapping pipeline and variant calling**

711 Prior to mapping, we trimmed and filtered raw FASTQ reads to remove low-quality bases  
712 (minimum base PHRED quality = 18; minimum sequence length = 75 bp) and sequencing  
713 adaptors using *cutadapt* (v. 1.8.3; Martin 2011). We retained only pairs for which both  
714 reads fulfilled our quality criteria after trimming. FastQC analyses of trimmed and quality  
715 filtered reads showed overall high base-qualities (median range 29-35), with ~1.36% of  
716 bases lost after trimming. We used *bwa mem* (v. 0.7.15; Li 2013) with default parameters  
717 to map the trimmed reads. To avoid paralogous mapping, we mapped to a compound  
718 reference, consisting of the genomes of *D. melanogaster* (v.6.12) and common  
719 commensals and pathogens, including *Saccharomyces cerevisiae* (GCF\_000146045.2),  
720 *Wolbachia pipientis* (NC\_002978.6), *Pseudomonas entomophila* (NC\_008027.1),  
721 *Commensalibacter intestine* (NZ\_AGFR000000000.1), *Acetobacter pomorum*  
722 (NZ\_AEUP000000000.1), *Gluconobacter morbifer* (NZ\_AGQV000000000.1), *Providencia*  
723 *burhodogranariea* (NZ\_AKKL000000000.1), *Providencia alcalifaciens*  
724 (NZ\_AKKM01000049.1), *Providencia rettgeri* (NZ\_AJSB000000000.1), *Enterococcus*

725 *faecalis* (NC\_004668.1), *Lactobacillus brevis* (NC\_008497.1), and *Lactobacillus plantarum*  
726 (NC\_004567.2). We used Picard (v.1.109; <http://picard.sourceforge.net>) to remove  
727 duplicate reads and reads with a mapping quality below 20. In addition, we re-aligned  
728 sequences flanking indels with GATK (v3.4-46; McKenna *et al.* 2010).  
729  
730 After mapping, we filtered reads due to *D. simulans* contamination, using the method of  
731 Bastide *et al.* (2013). To do this, we used fixed differences between *D. simulans* and *D.*  
732 *melanogaster* to identify reads from *D. simulans*. For the nine samples that had a  
733 contamination level > 1% (range 1.2 - 8.7%; Table S1), we used custom software to  
734 remove reads that mapped preferentially to the *D. simulans* genome (Hu *et al.* 2013) using  
735 competitive mapping to references from both species. After applying our decontamination  
736 pipeline, contamination levels dropped below 0.4 % for all nine samples.  
737  
738 We used *Qualimap* (v. 2.2., Okonechnikov *et al.* 2016) to evaluate average mapping  
739 qualities per population and chromosome, which ranged from 58.3 to 58.8 (Table S1).  
740 Sequencing depth ranged from 34x to 115x for autosomes and from 17x to 59x for X-  
741 chromosomes (Table S1). We then combined individual *bam* files from all samples into a  
742 single *mpileup* file using *samtools* (v. 1.3; Li & Durbin 2009). Due to the large number of  
743 samples, we implemented quality control criteria for all libraries jointly to call SNPs. To call  
744 SNPs, we developed custom software (*PoolSNP*; see Supplementary File 2; available at  
745 doi: <https://doi.org/10.5061/dryad.rj1qn54>) using stringent heuristic parameters: (1)  
746 minimum coverage 10x for each sample, (2) maximum coverage < 95th coverage  
747 percentile for a given chromosome and sample (to avoid paralogous regions duplicated in  
748 the sample but not in the reference), (3) for each allele, a minimum read count > 20x and a  
749 minimum read frequency > 0.001, across all samples pooled. These parameters were

750 optimized based on simulated Pool-Seq data to maximize true positives and minimize  
751 false positives (Supplementary File 2). We also excluded SNPs (1) for which more than  
752 20% of all samples did not fulfil the above-mentioned coverage thresholds, (2) which were  
753 located within 5 bp of an indel with a minimum count larger than 10x in all samples pooled,  
754 and (3) which were located within known TEs based on the *D. melanogaster* TE library  
755 v.6.10. We annotated our final set of SNPs with *SNPeff* (v.4.2; Cingolani *et al.* 2012) using  
756 the Ensembl genome annotation version BDGP6.82.

757

### 758 **Additional samples**

759 We obtained genome sequences from African flies from the *Drosophila* Genome Nexus  
760 (DGN; <http://www.johnpool.net/genomes.html>); see Table S5 for SRA accession numbers).  
761 We used data from 14 individuals from Rwanda and 40 from Siavonga (Zambia). We  
762 mapped these data as described above and built consensus sequences for each haploid  
763 sample by only considering alleles with > 0.9 allele frequencies. We converted consensus  
764 sequences to *VCF* and used *VCFtools* (Danecek *et al.* 2011) for downstream analyses.

765

### 766 **Genetic variation in Europe**

767 We characterized patterns of genetic variation among the 48 samples for the five major  
768 chromosomal arms (*X*, *2L*, *2R*, *3L*, *3R*) by estimating  $\pi$ , Watterson's  $\theta$  and Tajima's *D*  
769 (Watterson 1975; Nei 1987; Tajima 1989), using corrections for Pool-Seq data (Kofler *et*  
770 *al.* 2011). To perform these analyses for our set of SNPs, we re-implemented the methods  
771 of Kofler *et al.* (2011) in Python (PoolGen; doi: <https://doi.org/10.5061/dryad.rj1gn54>). To  
772 calculate unbiased window-wise estimates of parameters, we used an output file of our  
773 SNP calling pipeline (*PoolSNP*; doi: <https://doi.org/10.5061/dryad.rj1gn54>), which indicates  
774 for any given site [in the reference, if it passed the filtering parameters used for SNP](#)

775 calling. These data allow for the calculation of the effective window-size, which is the  
776 difference between the total window-size and the number of sites that did not pass the  
777 quality criteria. Using effective windows-sizes as the denominator for the calculation of  
778 window-wise averages yields unbiased average estimates. In contrast, dividing the  
779 summed statistics in a given window by the total window-size, which is common practice in  
780 most software tools, results in an underestimation of averaged parameters. Before  
781 calculating the estimators, we subsampled the data to an even coverage of 40x for  
782 autosomes and 20x for the X-chromosome, as Watterson's  $\theta$  and Tajima's  $D$  are sensitive  
783 to coverage variation (Korneliussen *et al.* 2013). We calculated chromosome-wide  
784 averages of  $\pi$ ,  $\theta$  and Tajima's  $D$  for autosomes and X chromosomes using *R* (*R*  
785 Development Core Team 2009). We tested for correlations between these estimators and  
786 latitude, longitude, altitude, and season using a linear regression model:  $y_i = Lat + Lon +$   
787  $Alt + Season + \epsilon_i$ , where  $y_i$  represents  $\pi$ ,  $\theta$  or  $D$ . We used *Lat*, *Lon* and *Alt* as continuous  
788 predictors (Table 1) and *Season* as a categorical factor with two levels, corresponding to  
789 collection dates before and after 1<sup>st</sup> September ('summer' and 'fall'), respectively, following  
790 Bergland *et al.* (2014) and Kapun *et al.* (2016a). To test for residual spatio-temporal  
791 autocorrelation among the samples (Kühn & Dormann 2012), we calculated Moran's  $I$   
792 (Moran 1950) with the *R* package *spdep* (v.06-15., Bivand & Piras 2015) for the residuals  
793 of the above models. For this analysis, we considered samples within 10° latitude /  
794 longitude to be neighbours, based on the pairwise geographical distances between  
795 collection locations. Whenever these tests revealed significant autocorrelations indicating  
796 non-independence, we repeated the above regressions using a spatial weights matrix  
797 based on nearest neighbours as described above to test for remaining spatial patterning in  
798 residuals as implemented in *spdep*. We also fitted models with run ID as a random factor  
799 using the *R* package *lme4* (v.1.1-14; see Supplementary File 2) to test for confounding

800 effects of variation in error rates among sequencing runs. As these models did not fit  
801 significantly better than simpler models, we excluded it from final analysis (see  
802 Supplementary File 2 and Table S3).

803

804 To investigate genome-wide patterns of variation, we averaged  $\pi$ ,  $\theta$ , and  $D$  in 200 kb non-  
805 overlapping windows for each sample and chromosomal arm separately and plotted the  
806 distributions in  $R$ . In addition, to investigate fine-scale deviations from neutral expectations,  
807 we also calculated Tajima's  $D$  in 50 kb sliding windows with a step size of 10 kb. We  
808 normalized diversity statistics using log-transformation and tested for correlations between  
809  $\pi$  and recombination rate for 100 kb non-overlapping windows in  $R$  and plotted these data  
810 using the *ggplot2* (v.2.2.1., Wickham 2016). We used both fine-scale (Comeron *et al.*  
811 2012) and broad-scale (Fiston-Lavier *et al.* 2010) estimates of recombination rate, after  
812 converting their coordinates to reference genome v 6.

813

814 To identify regions under selection, we used *Pool-hmm* to calculate the SFS (Site  
815 Frequency Spectrum) for each sample in the *pileup* format file with the following  
816 parameters *--prefix* (to assign a name to each sample), *-n* (number of chromosomes), *--*  
817 *only-spectrum* (for the SFS calculation), *--theta* 0.005 (default), and *-r* 100 (subsampling of  
818 1/100 SNPs). We then split the *pileups* by chromosome and ran *Pool-hmm* with the  
819 following parameters: *--prefix*, *-n*, *-k* (per site transition probability between hidden states),  
820 *-s* (frequency spectrum file from previous step) and *-e sanger* (*Phred quality* = 33). For the  
821 18 samples for which Tajima's  $D$  was very low, *Pool-hmm* identified the majority of the  
822 genome to be under selection; we thus removed those samples from our analysis. We  
823 used three different *k parameters* depending on the sample:  $k=1e^{-10}$ ,  $k=1e^{-30}$ , and  $k=1e^{-40}$   
824 (Table S6A). For windows with significantly low Tajima's  $D$  in euchromatic regions, we

825 identified genes using *bedtools intersect* (v2.27.1) and the *D. melanogaster* v6.12  
826 annotation file from Flybase (Thurmond et al 2019). For genes significant in all  
827 populations, we checked whether average Tajima's *D* was among the lowest 10% per  
828 chromosome. We tested for enrichment of involvement in particular biological processes  
829 using *DAVID* with default parameters (Huang et al 2009).

830

### 831 **Genetic differentiation and population structure in European populations**

832 To estimate genome-wide pairwise genetic differences, we used custom software to  
833 estimate SNP-wise  $F_{ST}$  using the approach of Weir and Cockerham (1984) for all pairwise  
834 combinations of samples. For each sample, we averaged pairwise  $F_{ST}$  between that  
835 sample and the other 47 samples and ranked the 48 population samples by overall  
836 differentiation.

837

838 We inferred demographic patterns by focusing on putatively neutrally evolving SNPs. For  
839 this, we used either 4-fold degenerate sites (defined using the genome sequences and the  
840 annotation features of the *D. melanogaster* reference genome version 6.12) or short  
841 introns (<60 bp; Haddrill *et al.* 2005; Singh *et al.* 2009; Parsch *et al.* 2010; Clemente &  
842 Vogl 2012; Lawrie *et al.* 2013). We also restricted our analyses to SNPs that were at least  
843 1 Mb distant from major chromosomal inversions (see below) and those located in  
844 genomic regions with high recombination rates ( $r > 3\text{cM/Mb}$ ; Comeron et al. 2012) to  
845 minimize the effects of linkage, which may confound analyses of neutral evolution. As the  
846 Sheffield (UK) population showed unusually high differentiation from other populations, we  
847 repeated the following analyses without the Sheffield sample. To assess isolation by  
848 distance (IBD), we averaged pairwise  $F_{ST}$  values across all neutral markers. We calculated  
849 geographic distance using the haversine formula (Green & Smart 1985), which takes the



850 spherical curvature of the planet into account. We tested for correlations between  
851 linearized genetic differentiation (Slatkin's distance:  $F_{ST}/([1-F_{ST}])$ ) and  $\log_{10}$ -scaled  
852 geographic distance (Slatkin 1985) using Mantel tests implemented in *ade4* (v.1.7-8., Dray  
853 & Dufour 2007) with 1,000,000 iterations. In addition, we plotted the 5% smallest and  
854 largest  $F_{ST}$  values from all 1,128 pairwise comparisons among the 48 population samples  
855 onto a map to visualize geographic patterns of genetic differentiation.

856

857 We tested for population substructure using two different approaches. First, we performed  
858 principal component analysis (PCA) based on unscaled allele frequencies of the neutral  
859 marker SNPs, as suggested by Menozzi *et al.* (1978) and Novembre and Stephens (2008),  
860 using *LEA* (v. 1.2.0., Frichot *et al.* 2013). We focused on the first three principal  
861 components (PCs) and used *mclust* (v. 5.2., Fraley & Raftery 2012) to estimate the  
862 number of clusters *via* maximum likelihood and assigned population samples to clusters  
863 *via* *k*-means. In addition, we examined the first three PCs for correlations with latitude,  
864 longitude, altitude, and season using general linear models and tested for spatial  
865 autocorrelation as above. A Bonferroni-corrected  $\alpha$  threshold ( $\alpha' = 0.05/3 = 0.017$ ) was  
866 used to correct for multiple testing.

867

868 In a second, complementary approach, we inferred population delineation using model-  
869 based clustering as implemented in *ConStruct* (v.1.0.2; Bradburd *et al.* 2018). In contrast  
870 to most clustering-based methods, *ConStruct* incorporates continuous isolation by  
871 distance to avoid inflating estimates of the number of clusters and allows estimating  
872 admixture among populations. We ran spatial models with three MCMC chains per run and  
873 10,000 iterations and compared the goodness of fit for models incorporating 1 to 10 spatial  
874 layers by cross-validation.



875

## 876 **Mitochondrial DNA**

877 To obtain consensus mitochondrial sequences for each of the 48 European populations,  
878 we aligned reads from individual FASTQ files and replaced minor variants with the major  
879 variant using *Coral* (Salmela & Schröder 2011). This method prevents ambiguities from  
880 interfering with the assembly process. We assembled a genome for each population from  
881 the modified FASTQ files using *SPAdes* with standard parameters and *k*-mers of size 21,  
882 33, 55, and 77 (Bankevich *et al.* 2012). Mitochondrial contigs were retrieved by *blastn*,  
883 using the *D. melanogaster* NC 024511 sequence as a query and each genome assembly  
884 as the database. To avoid nuclear mitochondrial DNA segments (numts), we ensured that  
885 only contigs with a higher than average coverage of the genome were retrieved. When  
886 multiple contigs were available for the same region, the one with the highest coverage was  
887 selected. Possible contamination with *D. simulans* was assessed by looking for two or  
888 more consecutive sites that show the same variant as *D. simulans* and looking for  
889 alternative contigs for that region with similar coverage. As an additional quality control  
890 measure, we also examined the presence of pairs of sites showing four gametic types  
891 using *DNAsp 6* (Rozas *et al.* 2017) – given that there is no recombination in mitochondrial  
892 DNA no such sites are expected. The very few sites presenting such features were  
893 rechecked by looking for alternative contigs for that region and were corrected if needed.  
894 The uncorrected raw reads for each population were mapped on top of the different  
895 consensus haplotypes using *Express* as implemented in *Trinity* (Grabherr *et al.* 2011). If  
896 most reads for a given population mapped to the consensus sequence derived for that  
897 population the consensus sequence was retained, otherwise it was discarded as a  
898 possible chimera between different mitochondrial haplotypes. The repetitive mitochondrial  
899 hypervariable region is difficult to assemble and was therefore not used; the mitochondrial

900 region was thus analysed as in Cooper *et al.* (2015). Mitochondrial genealogy was  
901 estimated using statistical parsimony (TCS network; Clement *et al.* 2000), as implemented  
902 in *PopArt* (<http://popart.otago.ac.nz>), and the surviving mitochondrial haplotypes.  
903 Frequencies of the different mitochondrial haplotypes were estimated from FPKM values  
904 using the surviving mitochondrial haplotypes and expressed as implemented in *Trinity*  
905 (Grabherr *et al.* 2011).

906

### 907 **Transposable elements**

908 To quantify transposable element (TE) abundance in each sample, we assembled and  
909 quantified repeats from unassembled sequenced reads using *dnaPipeTE* (v.1.2., Goubert  
910 *et al.* 2015). Only the left read of each pair were used. As the vast majority of high-quality  
911 trimmed reads were longer than 135 bp, we discarded reads shorter than this before  
912 sampling. Reads matching mtDNA were filtered out by mapping to the *D. melanogaster*  
913 reference mitochondrial genome (NC\_024511.2. 1) with *bowtie2* (v. 2.1.0., Langmead &  
914 Salzberg 2012). Prokaryotic sequences, including reads from symbiotic bacteria such as  
915 *Wolbachia*, were filtered out from the reads using the implementation of *blastx* vs. the non-  
916 redundant protein database (nr) using *DIAMOND* (v. 0.8.7, Buchfink *et al.* 2015). To  
917 quantify TE content, we subsampled a proportion of the raw reads (after filtering)  
918 corresponding to a genome coverage of 0.1X (assuming a genome size of 175 MB), and  
919 then assembled these reads with *Trinity* (Grabherr *et al.* 2011). Due to the low coverage of  
920 the genome obtained with the subsampled reads, only repetitive DNA present in multiple  
921 copies should be fully assembled (Goubert *et al.* 2015). To assess the constancy of the  
922 estimates, we repeated this process with three iterations per sample, as recommended by  
923 the program guidelines.

924

925 We further estimated frequencies of TEs present in the reference genome with *T-lex2* (v.  
926 2.2.2., Fiston-Lavier *et al.* 2015), using all annotated TEs (5,416 TEs) in version 6.04 of  
927 the *D. melanogaster* genome from flybase.org (Gramates *et al.* 2017). For 108 of these  
928 TEs, we used the corrected coordinates as described in Fiston-Lavier *et al.* (2015), based  
929 on the identification of target site duplications at the site of the insertion. We excluded TEs  
930 nested or flanked by other TEs (<100 bp on each side of the TE), and TEs, which are part  
931 of segmental duplications, since *T-lex2* does not provide accurate frequency estimates in  
932 complex regions (Fiston-Lavier *et al.* 2015). We additionally excluded the INE-1 TE family,  
933 as this TE family is ancient, with 2,234 insertions in the reference genome, which appear  
934 to be mostly fixed (Kapitonov & Jurka 2003). After applying these filters, we were able to  
935 estimate frequencies of 1,630 TE insertions from 113 families from the three main orders,  
936 LTR, non-LTR, and DNA across all *DrosEU* samples. Because the mapper used by *T-lex2*  
937 to detect the presence of insertions (presence module) only accepts reads  $\leq 127$  bp, we  
938 trimmed reads longer than 100 bp into two equally sized fragments using *Trimmomatic* (v.  
939 0.35; Bolger *et al.* 2014) with the CROP and HEADCROP parameters.

940 To avoid inaccurate TE frequency estimates due to very low numbers of reads, we only  
941 considered frequency estimates based on at least 3 reads. Despite the stringency of *T-*  
942 *lex2* to select only high-quality reads, we additionally discarded frequency estimates  
943 supported by more than 90 reads, i.e. 3 times the average coverage of the sample with the  
944 lowest coverage (CH\_Cha\_14\_43, Table S1), in order to avoid non-uniquely mapping  
945 reads. This filtering allows to estimate TE frequencies for ~96% (92.9% to 97.8%) of the  
946 TEs in each population. For 85% of the TEs, we were able to estimate their frequencies in  
947 more than 44 out of 48 *DrosEU* samples.

948 We tested for correlations between TE insertion frequencies and recombination rates  
949 using Spearman's rank correlations as implemented in *R*. For SNPs, we used

950 recombination rates from Comeron *et al.* (2012) and from Fiston-Lavier *et al.* (2010) in  
951 non-overlapping 100 kb windows and assigned to each TE insertion the recombination  
952 rate of the corresponding window.

953 To test for spatio-temporal variation of TE insertions, we excluded TEs with an interquartile  
954 range (IQR) < 10. We tested the population frequencies of the remaining 141 insertions for  
955 correlations with latitude, longitude, altitude, and season using generalized linear models  
956 (ANCOVA) following the method used for SNPs but with a binomial error structure in  $R$ .  
957 We further tested if significant correlations with either of the predictor variables deviated  
958 from expectations under neutral evolution. To this end, we repeated the ANCOVA  
959 analyses on 8,727 presumably neutrally evolving 4-fold degenerate sites that we described  
960 previously in the demographic analyses. Based on  $F$ -ratios obtained from the ANCOVA  
961 models for each neutral SNP and predictor, we built empirical density functions and  
962 calculated empirical  $p$ -values for each TE by integrating over the area of the curve that is  
963 delineated by the  $F$ -value specific for the given TE and the maximum  $F$ -ratio in the neutral  
964 dataset.

965 We also tested for residual spatio-temporal autocorrelations in TE insertion frequencies,  
966 with Moran's  $I$  test (Moran 1950; Kühn & Dormann 2012). We used Bonferroni corrections  
967 to account for multiple testing ( $\alpha' = 0.05/141 = 0.00035$ ) and only considered Bonferroni-  
968 corrected  $p$ -values < 0.001 to be significant. To test TE family enrichment among the  
969 significant TEs we performed a  $\chi^2$  test and applied Yate's correction to account for the low  
970 number of some of the cells.

971

## 972 **Inversion polymorphisms**

973 Since Pool-Seq data precludes a direct assessment of the presence and frequencies of  
974 chromosomal inversions, we indirectly estimated inversion frequencies using a panel of

975 approximately 400 inversion-specific marker SNPs (Kapun *et al.* 2014) for six  
976 cosmopolitan inversions (*In(2L)t*, *In(2R)NS*, *In(3L)P*, *In(3R)C*, *In(3R)Mo*, *In(3R)Payne*). We  
977 averaged allele frequencies of these markers in each sample separately. To test for clinal  
978 variation in the frequencies of inversions, we tested for correlations with latitude, longitude,  
979 altitude and season using generalized linear models with a binomial error structure in *R* to  
980 account for the biallelic nature of karyotype frequencies. In addition, we Bonferroni-  
981 corrected the  $\alpha$  threshold ( $\alpha' = 0.05/7 = 0.007$ ) to account for multiple testing, accounted for  
982 residual spatio-temporal autocorrelations and tested if *F*-ratios of the ANCOVAs deviated  
983 from neutral expectations as explained above.

984

## 985 **Microbiome**

986 Raw sequences were trimmed, and quality filtered as described for the genomic data  
987 analysis. The remaining high-quality sequences were mapped against the *D.*  
988 *melanogaster* genome (v.6.04) including mitochondria using *bbmap* (v. 35; Bushnell 2016)  
989 with standard settings. The unmapped sequences were submitted to the online  
990 classification tool, *MGRAST* (Meyer *et al.* 2008) for annotation. Taxonomy information was  
991 downloaded and analysed in *R* (v. 3.2.3; R Development Core Team 2009) using the *matR*  
992 (v. 0.9; Braithwaite & Keegan) and *RJSONIO* (v. 1.3; Lang) packages. Metazoan  
993 sequence features were removed. For microbial load comparisons, the number of protein  
994 features identified by *MGRAST* for each taxon and sample was divided by the number of  
995 sequences that mapped to *D. melanogaster* chromosomes *X*, *Y*, *2L*, *2R*, *3L*, *3R* and *4*.

996

997 We also surveyed the datasets for the presence of novel DNA viruses by performing *de*  
998 *novo* assembly of the non-fly reads using *SPAdes* 3.9.0 (Bankevich *et al.* 2012) and using  
999 conceptual translations to query virus proteins from *Genbank* using *DIAMOND* 'blastp'

1000 (Buchfink *et al.* 2015). In three cases (*Kallithea* virus, *Vesanto* virus, *Viltain* virus), reads  
1001 from a single sample pool were sufficient to assemble a (near) complete genome. In two  
1002 other cases, fragmentary assemblies allowed us to identify additional publicly available  
1003 datasets that contained sufficient reads to complete the genomes (*Linwill Road* virus,  
1004 *Esparto* virus; completed using SRA datasets SRR2396966 and SRR3939042,  
1005 respectively). Novel viruses were provisionally named based on the localities where they  
1006 were first detected, and the corresponding novel genome sequences were submitted to  
1007 Genbank (KX130344, KY608910, KY457233, KX648533-KX648536). To assess the  
1008 relative amount of viral DNA, unmapped (non-fly) reads from each sample pool were  
1009 mapped to repeat-masked *Drosophila* DNA virus genomes using *bowtie2*, and coverage  
1010 normalized relative to virus genome length and the number of mapped *Drosophila* reads.

1011

## 1012 **Acknowledgments**

1013 We are grateful to all members of the *DrosEU* and Dros-RTEC consortia and to Dmitri  
1014 Petrov (Stanford University) for support and discussion. *DrosEU* is funded by a Special  
1015 Topic Networks (STN) grant from the European Society for Evolutionary Biology (ESEB).  
1016 Computational analyses were partially executed at the Vital-IT bioinformatics facility of the  
1017 University of Lausanne (Switzerland), at the computing facilities of the CC LBBE/PRABI in  
1018 Lyon (France) and at the bwUniCluster of the state of Baden-Württemberg (bwHPC).

1019

## 1020 **Additional information**

### 1021 **Funding**

| <b>Funder</b> | <b>Grant reference<br/>number</b> | <b>Author</b> |
|---------------|-----------------------------------|---------------|
|---------------|-----------------------------------|---------------|

|                                                                                             |                                  |                                   |
|---------------------------------------------------------------------------------------------|----------------------------------|-----------------------------------|
| University of Freiburg Research Innovation<br>Fund 2014. Deutsche<br>Forschungsgemeinschaft | STA1154/4-1Project<br>408908608  | Fabian Staubach                   |
| Academy of Finland                                                                          | #268241                          | Maaria Kankare                    |
| Academy of Finland                                                                          | #272927                          | Maaria Kankare                    |
| Russian Foundation of Basic Research                                                        | #15-54-46009 CT_a                | Elena G.<br>Pasyukova             |
| Danish Natural Science Research Council                                                     | 4002-00113                       | Volker<br>Loeschcke               |
| Ministerio de Economia y Competitividad                                                     | CTM2017-88080<br>(AEI/FEDER, UE) | Marta Pascual                     |
| CNRS                                                                                        | UMR 9191                         | Catherine<br>Montchamp-<br>Moreau |
| Vetenskapsrådet                                                                             | 2011-05679                       | Jessica Abbott                    |
| Vetenskapsrådet                                                                             | 2015-04680                       | Jessica Abbott                    |
| Emmy Noether Programme of the Deutsche<br>Forschungsgemeinschaft, DFG                       | PO 1648/3-1                      | Nico Posnien                      |
| National Institute of Health (NIH)                                                          | R35GM119686                      | Alan O. Bergland                  |
| Ministerio de Economia y Competitividad                                                     | CGL2013-42432-P                  | Maria Pilar<br>Garcia Guerreiro   |
| Scientific and Technological Research<br>Council of Turkey (TUBITAK)                        | #214Z238                         | Banu Sebnem<br>Onder              |
| ANR Exhyb                                                                                   | 14-CE19-0016                     | Cristina Vieira                   |

|                                                                                                  |                              |                         |
|--------------------------------------------------------------------------------------------------|------------------------------|-------------------------|
| Network of Excellence LifeSpan                                                                   | FP6 036894                   | Bas J. Zwaan            |
| IDEAL                                                                                            | FP7/2007-<br>2011/259679     | Bas J. Zwaan            |
| Israel Science Foundation                                                                        | 1737/17                      | Eran Tauber             |
| National Institute of Health (NIH)                                                               | R01GM100366                  | Paul S. Schmidt         |
| Deutsche Forschungsgemeinschaft                                                                  | PA 903/8-1                   | John Parsch             |
| Austrian Science Fund (FWF)                                                                      | P27048                       | Andrea J.<br>Betancourt |
| Biotechnology and Biological Sciences<br>Research Council (BBSRC)                                | BB/P00685X/1                 | Andrea J.<br>Betancourt |
| Swiss National Science Foundation (SNSF)                                                         | PP00P3_133641                | Thomas Flatt            |
| Swiss National Science Foundation (SNSF)                                                         | PP00P3_165836                | Thomas Flatt            |
| European Comission                                                                               | H2020-ERC-<br>2014CoG-647900 | Josefa González         |
| Secretaria d'Universitats i Recerca. Dept<br>Economia i Coneixement. Generalitat de<br>Catalunya | GRC 2017 SGR 880             | Josefa González         |
| Ministerio de Economia y Competitividad                                                          | FEDER BFU2014-<br>57779-P    | Josefa González         |

1022

1023 **Author contributions**

1024 Martin Kapun, Visualization, Writing-original draft preparation, Formal analysis,

1025 Conceptualization, Writing-review & editing, Supervision, Methodology, Investigation, Data

1026 curation, Project administration, Validation, Resources, Software; Maite G. Barrón,



1027 Visualization, Writing-original draft preparation, Formal analysis, Conceptualization,  
1028 Writing-review & editing, Methodology, Investigation, Data curation, Project administration,  
1029 Validation, Resources, Software; Fabian Staubach, Visualization, Writing-original draft  
1030 preparation, Formal analysis, Conceptualization, Writing-review & editing, Supervision,  
1031 Funding acquisition, Methodology, Investigation, Data curation, Validation, Resources,  
1032 Software; Jorge Vieira, Visualization, Writing-original draft preparation, Formal analysis,  
1033 Conceptualization, Writing-review & editing, Methodology, Investigation, Validation,  
1034 Resources; Darren J. Obbard, Writing-original draft preparation, Formal analysis,  
1035 Conceptualization, Writing-review & editing, Methodology, Investigation, Validation,  
1036 Resources; Clément Goubert, Visualization, Writing-original draft preparation, Formal  
1037 analysis, Conceptualization, Writing-review & editing, Investigation, Resources; Omar  
1038 Rota-Stabelli, Visualization, Writing-original draft preparation, Formal analysis,  
1039 Conceptualization, Writing-review & editing, Methodology, Investigation, Resources;  
1040 Maaria Kankare, Writing-original draft preparation, Conceptualization, Writing-review &  
1041 editing, Methodology, Investigation, Resources; María Bogaerts-Márques, Alejandro  
1042 Sánchez-Gracia, Formal analysis, Writing-review & editing, Investigation, Validation,  
1043 Resources; Annabelle Haudry, Writing-original draft preparation, Formal analysis,  
1044 Conceptualization, Writing-review & editing, Investigation, Validation, Resources; R. Axel  
1045 W. Wiberg, Writing-original draft preparation, Formal analysis, Conceptualization, Writing-  
1046 review & editing, Methodology, Investigation, Resources, Software; Lena Waidele, Svitlana  
1047 Serga, Patricia Gibert, Damiano Porcelli, Sonja Grath, Eliza Argyridou, Lain Guio, Mads  
1048 Fristrup Schou, Conceptualization, Writing-review & editing, Investigation, Resources;  
1049 Iryna Kozeretska, Conceptualization, Writing-review & editing, Methodology, Investigation,  
1050 Resources; Elena G. Pasyukova, Marta Pascual, Alan O. Bergland, Conceptualization,  
1051 Writing-review & editing, Funding acquisition, Methodology, Investigation, Resources;

1052 Volker Loeschcke, Catherine Montchamp-Moreau, Jessica Abbott, Nico Posnien, Maria  
1053 Pilar Garcia Guerreiro, Banu Sebnem Onder, Conceptualization, Writing-review & editing,  
1054 Funding acquisition, Investigation, Resources; Cristina P. Vieira, Visualization, Formal  
1055 analysis, Conceptualization, Writing-review & editing, Investigation, Resources; Élio  
1056 Sucena, Conceptualization, Writing-review & editing, Methodology, Investigation, Project  
1057 administration, Resources; Cristina Vieira, Michael G. Ritchie, Thomas Flatt, Josefa  
1058 González, Writing-original draft preparation, Conceptualization, Writing-review & editing,  
1059 Supervision, Funding acquisition, Methodology, Investigation, Project administration,  
1060 Validation, Resources; Bart Deplancke, Conceptualization, Writing-review & editing,  
1061 Funding acquisition, Investigation; Bas J. Zwaan, Visualization, Writing-original draft  
1062 preparation, Conceptualization, Writing-review & editing, Supervision, Funding acquisition,  
1063 Methodology, Investigation, Project administration; Eran Tauber, Writing-original draft  
1064 preparation, Conceptualization, Writing-review & editing, Funding acquisition,  
1065 Methodology, Investigation, Resources; Dorcas J. Orengo, Eva Puerma,  
1066 Conceptualization, Writing-review & editing, Investigation, Validation, Resources;  
1067 Montserrat Agudé, Writing-original draft preparation, Conceptualization, Writing-review &  
1068 editing, Methodology, Investigation, Validation, Resources; Paul S. Schmidt, John Parsch,  
1069 Writing-original draft preparation, Conceptualization, Writing-review & editing, Funding  
1070 acquisition, Methodology, Investigation, Validation, Resources; Andrea J. Betancourt,  
1071 Writing-original draft preparation, Formal analysis, Conceptualization, Writing-review &  
1072 editing, Supervision, Funding acquisition, Methodology, Investigation, Project  
1073 administration, Validation, Resources.

1074

1075 **Author ORCIDs**

| <b>Names</b>               | <b>ORCID</b>        |
|----------------------------|---------------------|
| Martin Kapun               | 0000-0002-3810-0504 |
| Maite G. Barrón            | 0000-0001-6146-6259 |
| Fabian Staubach            | 0000-0002-8097-2349 |
| Jorge Vieira               | 0000-0001-7032-5220 |
| Darren J. Obbard           | 0000-0001-5392-8142 |
| Clément Goubert            | 0000-0001-8034-5559 |
| Omar Rota-Stabelli         | 0000-0002-0030-7788 |
| Maaria Kankare             | 0000-0003-1541-9050 |
| María Bogaerts-Márquez     | 0000-0001-9107-984X |
| Annabelle Haudry           | 0000-0001-6088-0909 |
| R. Axel W. Wiberg          | 0000-0002-8074-8670 |
| Lena Waidele               | 0000-0002-6323-6438 |
| Iryna Kozeretska           | 0000-0002-6485-1408 |
| Elena G. Pasyukova         | 0000-0002-6491-8561 |
| Volker Loeschcke           | 0000-0003-1450-0754 |
| Marta Pascual              | 0000-0002-6189-0612 |
| Cristina P. Vieira         | 0000-0002-7139-2107 |
| Svitlana Serga             | 0000-0003-1875-3185 |
| Catherine Montchamp-Moreau | 0000-0002-5044-9709 |
| Jessica Abbott             | 0000-0002-8743-2089 |
| Patricia Gibert            | 0000-0002-9461-6820 |
| Damiano Porcelli           | 0000-0002-9019-5758 |
| Nico Posnien               | 0000-0003-0700-5595 |

|                              |                     |
|------------------------------|---------------------|
| Alejandro Sánchez-Gracia     | 0000-0003-4543-4577 |
| Sonja Grath                  | 0000-0003-3621-736X |
| Élio Sucena                  | 0000-0001-8810-870X |
| Alan O. Bergland             | 0000-0001-7145-7575 |
| Maria Pilar Garcia Guerreiro | 000-0001-9951-1879X |
| Banu Sebnem Onder            | 0000-0002-3003-248X |
| Eliza Argyridou              | 0000-0002-6890-4642 |
| Lain Guio                    | 0000-0002-5481-5200 |
| Mads Fristrup Schou          | 0000-0001-5521-5269 |
| Bart Deplancke               | 0000-0001-9935-843X |
| Cristina Vieira              | 0000-0003-3414-3993 |
| Michael G. Ritchie           | 0000-0001-7913-8675 |
| Bas J. Zwaan                 | 0000-0002-8221-4998 |
| Eran Tauber                  | 0000-0003-4018-6535 |
| Dorcas J. Orengo             | 0000-0001-7911-3224 |
| Eva Puerma                   | 0000-0001-7261-187X |
| Montserrat Aguadé            | 0000-0002-3884-7800 |
| Paul S. Schmidt              | 0000-0002-8076-6705 |
| John Parsch                  | 0000-0001-9068-5549 |
| Andrea J. Betancourt         | 0000-0001-9351-1413 |
| Thomas Flatt                 | 0000-0002-5990-1503 |
| Josefa González              | 0000-0001-9824-027X |

1076

1077 **References**

- 1078 Adrian AB, Comeron JM (2013) The *Drosophila* early ovarian transcriptome provides  
1079 insight to the molecular causes of recombination rate variation across genomes. *BMC*  
1080 *Genomics*, **14**, 1-12.
- 1081 Adrion JR, Hahn MW, Cooper BS (2015) Revisiting classic clines in *Drosophila*  
1082 *melanogaster* in the age of genomics. *Trends in Genetics*, **31**, 434–444.
- 1083 Alonso-Blanco C, Andrade J, Becker C *et al.* (2016) 1,135 Genomes Reveal the Global  
1084 Pattern of Polymorphism in *Arabidopsis thaliana*. *Cell*, **166**, 481–491.
- 1085 Anderson AR, Hoffmann AA, McKechnie SW, Umina PA, Weeks AR (2005) The latitudinal  
1086 cline in the *In(3R)Payne* inversion polymorphism has shifted in the last 20 years in  
1087 Australian *Drosophila melanogaster* populations. *Molecular Ecology*, **14**, 851–858.
- 1088 Andolfatto P (2001) Contrasting Patterns of X-Linked and Autosomal Nucleotide Variation  
1089 in *Drosophila melanogaster* and *Drosophila simulans*. *Molecular Biology and Evolution*,  
1090 **18**, 279–290.
- 1091 Arguello JR, Laurent S, Clark AG. 2019. Demographic History of the Human Commensal  
1092 *Drosophila melanogaster*. *Genome Biology and Evolution* **11**:844–854.
- 1093 Aulard S, David JR, Lemeunier F (2002) Chromosomal inversion polymorphism in  
1094 Afrotropical populations of *Drosophila melanogaster*. *Genetic Research*, **79**, 49–63.
- 1095 Auton A, Abecasis GR, Altshuler DM (2015) A global reference for human genetic  
1096 variation. *Nature*, **526**, 68–74.
- 1097 Bankevich A, Nurk S, Antipov D *et al.* (2012) *SPAdes, a New Genome Assembly*  
1098 *Algorithm and Its Applications to Single-cell Sequencing (7th Annual SFAF Meeting,*  
1099 *2012)*. Mary Ann Liebert Inc.
- 1100 Barata A, Santos SC, Malfeito-Ferreira M, Loureiro V (2012) New insights into the  
1101 ecological interaction between grape berry microorganisms and *Drosophila* flies during  
1102 the development of sour rot. *Microbial Ecology*, **64**, 416–430.

- 1103 Bartolomé C, Maside X, Charlesworth B (2002) On the Abundance and Distribution of  
1104 Transposable Elements in the Genome of *Drosophila melanogaster*. *Molecular Biology*  
1105 *and Evolution*, **19**, 926–937.
- 1106 Bastide H, Betancourt A, Nolte V *et al.* (2013) A genome-wide, fine-scale map of natural  
1107 pigmentation variation in *Drosophila melanogaster*. *PLoS Genetics*, **9**, e1003534.
- 1108 Baudry E, Viginier B, Veuille M (2004) Non-African populations of *Drosophila*  
1109 *melanogaster* have a unique origin. *Molecular Biology and Evolution*, **21**, 1482–1491.
- 1110 Becher PG, Flick G, Rozpędowska E *et al.* (2012) Yeast, not fruit volatiles mediate  
1111 *Drosophila melanogaster* attraction, oviposition and development. *Functional Ecology*,  
1112 **26**, 822–828.
- 1113 Begun DJ, Aquadro CF (1992) Levels of naturally occurring DNA polymorphism correlate  
1114 with recombination rates in *D. melanogaster*. *Nature*, **356**, 519–520.
- 1115 Begun DJ, Aquadro CF (1993) African and North American populations of *Drosophila*  
1116 *melanogaster* are very different at the DNA level. *Nature*, **365**, 548–550.
- 1117 Begun DJ, Holloway AK, Stevens K *et al.* (2007) Population Genomics: Whole-Genome  
1118 Analysis of Polymorphism and Divergence in *Drosophila simulans*. *PLoS Biology*, **5**,  
1119 e310.
- 1120 Behrman EL, Howick VM, Kapun M *et al.* (2018) Rapid seasonal evolution in innate  
1121 immunity of wild *Drosophila melanogaster*. *Proceedings of the Royal Society of*  
1122 *London B*, **285**, 20172599.
- 1123 Beisswanger S, Stephan W, De Lorenzo D (2006) Evidence for a Selective Sweep in the  
1124 *wapl* Region of *Drosophila melanogaster*. *Genetics*, **172**, 265–274.
- 1125 Bergland AO, Behrman EL, O'Brien KR, Schmidt PS, Petrov DA (2014) Genomic Evidence  
1126 of Rapid and Stable Adaptive Oscillations over Seasonal Time Scales in *Drosophila*.  
1127 *PLoS Genetics*, **10**, e1004775.

- 1128 Bergland AO, Tobler R, González J, Schmidt P, Petrov D (2016) Secondary contact and  
1129 local adaptation contribute to genome-wide patterns of clinal variation in *Drosophila*  
1130 melanogaster. *Molecular Ecology*, **25**, 1157–1174.
- 1131 Betancourt AJ, Kim Y, Orr HA (2004) A pseudohitchhiking model of X vs. autosomal  
1132 diversity. *Genetics*, **168**, 2261–2269.
- 1133 Betancourt AJ, Welch JJ, Charlesworth B (2009) Reduced effectiveness of selection  
1134 caused by a lack of recombination. *Current Biology*, **19**, 655–660.
- 1135 Bilder D, Irvine KD (2017) Taking Stock of the *Drosophila* Research Ecosystem. *Genetics*  
1136 **206**, 1227–1236
- 1137 Bivand R, Piras G (2015) Comparing Implementations of Estimation Methods for Spatial  
1138 Econometrics. *Journal of Statistical Software*, **63**, 1–36.
- 1139 Black WC IV, Black WC IV, Baer CF, Antolin MF, DuTeau NM (2001) Population  
1140 genomics: genome-wide sampling of insect populations. *Annual Review of*  
1141 *Entomology*, **46**, 441–469
- 1142 Blumenstiel JP, Chen X, He M, Bergman CM (2014) An Age-of-Allele Test of Neutrality for  
1143 Transposable Element Insertions. *Genetics*, **196**, 523–538.
- 1144 Boitard S, Schlötterer C, Nolte V, Pandey RV, Futschik A (2012) Detecting Selective  
1145 Sweeps from Pooled Next-Generation Sequencing Samples. *Molecular Biology and*  
1146 *Evolution*, **29**, 2177–2186.
- 1147 Boitard S, Kofler R, Françoise P, Robelin D, Schlötterer C, Futschik A (2013) Pool-hmm: a  
1148 Python program for estimating the allele frequency spectrum and detecting selective  
1149 sweeps from next generation sequencing of pooled samples. *Mol Ecol Resour*, **13**,  
1150 337–340.
- 1151 Bolger AM, Lohse M, Usadel B (2014) Trimmomatic: a flexible trimmer for Illumina  
1152 sequence data. *Bioinformatics*, **30**, 2114–2120.

- 1153 Boussy IA, Itoh M, Rand D, Woodruff RC (1998) Origin and decay of the P element-  
1154 associated latitudinal cline in Australian *Drosophila melanogaster*. *Genetica*, **104**, 45–  
1155 57.
- 1156 Božičević V, Hutter S, Stephan W, Wollstein A (2016) Population genetic evidence for cold  
1157 adaptation in European *Drosophila melanogaster* populations. *Molecular Ecology*, **25**,  
1158 1175–1191.
- 1159 Bradburd GS, Coop GM, Ralph PL (2018) Inferring Continuous and Discrete Population  
1160 Genetic Structure Across Space. *Genetics* **210**, 33–52.
- 1161 Braithwaite DP, Keegan KP *matR: Metagenomics Analysis Tools for R*. [https://CRAN.R-](https://CRAN.R-project.org/package=matR)  
1162 [project.org/package=matR](https://CRAN.R-project.org/package=matR).
- 1163 Buchfink B, Xie C, Huson DH (2015) Fast and sensitive protein alignment using  
1164 DIAMOND. *Nature Methods*, **12**, 59–60.
- 1165 Buser CC, Newcomb RD, Gaskett AC, Goddard MR (2014) Niche construction initiates the  
1166 evolution of mutualistic interactions. *Ecology Letters*, **17**, 1257–1264.
- 1167 Bushnell B (2016) *BBMap short read aligner*. URL <http://sourceforge.net/projects/bbmap>.
- 1168 Caracristi G, Schlötterer C (2003) Genetic Differentiation Between American and  
1169 European *Drosophila melanogaster* Populations Could Be Attributed to Admixture of  
1170 African Alleles. *Molecular Biology and Evolution*, **20**, 792–799.
- 1171 Casillas S, Barbadilla A (2017) Molecular Population Genetics. *Genetics*, **205**, 1003–1035.
- 1172 Catania F, Kauer MO, Daborn PJ *et al.* (2004) World-wide survey of an Accord insertion  
1173 and its association with DDT resistance in *Drosophila melanogaster*. *Molecular*  
1174 *Ecology*, **13**, 2491–2504.
- 1175 Cavalli-Sforza LL (1966) Population Structure and Human Evolution. *Proceedings of the*  
1176 *Royal Society of London B*, **164**, 362–379.



- 1177 Chandler JA, James PM (2013) Discovery of trypanosomatid parasites in globally  
1178 distributed *Drosophila* species. *PLoS ONE*, **8**, e61937.
- 1179 Chandler JA, Eisen JA, Kopp A (2012) Yeast communities of diverse *Drosophila* species:  
1180 comparison of two symbiont groups in the same hosts. *Applied and Environmental*  
1181 *Microbiology*, **78**, 7327–7336.
- 1182 Chandler JA, Lang JM, Bhatnagar S, Eisen JA, Kopp A (2011) Bacterial communities of  
1183 diverse *Drosophila* species: ecological context of a host-microbe model system. *PLoS*  
1184 *Genetics*, **7**, e1002272.
- 1185 Charlesworth B (2001) The effect of life-history and mode of inheritance on neutral genetic  
1186 variability. *Genetical Research* **77**, 153–166.
- 1187 Charlesworth B, Sniegowski P, Stephan W (1994) The evolutionary dynamics of repetitive  
1188 DNA in eukaryotes. *Nature*, **371**, 215–220.
- 1189 Cheng C, White BJ, Kamdem C *et al.* (2012) Ecological genomics of *Anopheles gambiae*  
1190 along a latitudinal cline: a population-resequencing approach. *Genetics*, **190**, 1417–  
1191 1432.
- 1192 Cingolani P, Platts A, Wang LL *et al.* (2012) A program for annotating and predicting the  
1193 effects of single nucleotide polymorphisms, SnpEff: SNPs in the genome of *Drosophila*  
1194 *melanogaster* strain *w*<sup>1118</sup>; *iso-2*; *iso-3*. *Fly (Austin)*, **6**, 80–92.
- 1195 Clement M, Posada D, Crandall KA (2000) TCS: a computer program to estimate gene  
1196 genealogies. *Molecular Ecology*, **9**, 1657–1659.
- 1197 Clemente F, Vogl C (2012) Unconstrained evolution in short introns? – An analysis of  
1198 genome-wide polymorphism and divergence data from *Drosophila*. *Journal of*  
1199 *Evolutionary Biology*, **25**, 1975–1990.
- 1200 Comeron JM, Ratnappan R, Bailin S (2012) The many landscapes of recombination in  
1201 *Drosophila melanogaster*. *PLoS Genetics*, **8**, e1002905.

- 1202 Cooper BS, Burrus CR, Ji C, Hahn MW, Montooth KL (2015) Similar Efficacies of  
1203 Selection Shape Mitochondrial and Nuclear Genes in Both *Drosophila melanogaster*  
1204 and *Homo sapiens*. *G3*, **5**, 2165–2176.
- 1205 Corbett-Detig RB, Hartl DL (2012) Population Genomics of Inversion Polymorphisms in  
1206 *Drosophila melanogaster*. *PLoS Genetics*, **8**, e1003056.
- 1207 Cridland JM, Macdonald SJ, Long AD, Thornton KR (2013) Abundance and distribution of  
1208 transposable elements in two *Drosophila* QTL mapping resources. *Molecular Biology*  
1209 *and Evolution*, **30**, 2311–2327.
- 1210 Daborn PJ, Yen JL, Bogwitz MR *et al.* (2002) A single p450 allele associated with  
1211 insecticide resistance in *Drosophila*. *Science*, **297**, 2253–2256.
- 1212 David JR, Capy P (1988) Genetic variation of *Drosophila melanogaster* natural  
1213 populations. *Trends in Genetics*, **4**, 106–111.
- 1214 de Jong G, Bochdanovits Z (2003) Latitudinal clines in *Drosophila melanogaster*: body  
1215 size, allozyme frequencies, inversion frequencies, and the insulin-signalling pathway.  
1216 *Journal of Genetics*, **82**, 207–223.
- 1217 Dieringer D, Nolte V, Schlötterer C (2005) Population structure in African *Drosophila*  
1218 *melanogaster* revealed by microsatellite analysis. *Molecular Ecology*, **14**, 563–573.
- 1219 Dobzhansky T (1970) *Genetics of the Evolutionary Process*. Columbia University Press.
- 1220 Dray S, Dufour A-B (2007) The ade4 Package: Implementing the Duality Diagram for  
1221 Ecologists. *Journal of Statistical Software*, **22**. 1–20
- 1222 Duchon P, Zivkovic D, Hutter S, Stephan W, Laurent S (2013) Demographic inference  
1223 reveals African and European admixture in the North American *Drosophila*  
1224 *melanogaster* population. *Genetics*, **193**, 291–301.

- 1225 Durmaz E, Benson C, Kapun M, Schmidt P, Flatt T (2018) An Inversion Supergene in  
1226 *Drosophila* Underpins Latitudinal Clines in Survival Traits. *Journal of Evolutionary*  
1227 *Biology*, in press.
- 1228 Ellegren H (2014) Genome sequencing and population genomics in non-model organisms.  
1229 *Trends in Ecology & Evolution*, **29**, 51–63.
- 1230 Elya C, Lok TC, Spencer QE, McCausland H, Martinez CC, Eisen MB (2018) Robust  
1231 manipulation of the behavior of *Drosophila melanogaster* by a fungal pathogen in the  
1232 laboratory, *eLife*, **7**, e34414
- 1233 Fabian DK, Kapun M, Nolte V *et al.* (2012) Genome-wide patterns of latitudinal  
1234 differentiation among populations of *Drosophila melanogaster* from North America.  
1235 *Molecular Ecology*, **21**, 4748–4769.
- 1236 Fabian DK, Lack JB, Mathur V *et al.* (2015) Spatially varying selection shapes life history  
1237 clines among populations of *Drosophila melanogaster* from sub-Saharan Africa.  
1238 *Journal of Evolutionary Biology*, **28**, 826–840.
- 1239 Fiston-Lavier A-S, Barrón MG, Petrov DA, González J (2015) T-lex2: genotyping,  
1240 frequency estimation and re-annotation of transposable elements using single or  
1241 pooled next-generation sequencing data. *Nucleic Acids Research*, **43**, e22–e22.
- 1242 Fiston-Lavier A-S, Singh ND, Lipatov M, Petrov DA (2010) *Drosophila melanogaster*  
1243 recombination rate calculator. *Gene*, **463**, 18–20.
- 1244 Fraley C, Raftery AE (2012) *mclust Version 4 for R: Normal Mixture Modeling for Model-*  
1245 *Based Clustering, Classification, and Density Estimation*. [https://cran.r-](https://cran.r-project.org/web/packages/mclust)  
1246 [project.org/web/packages/mclust](https://cran.r-project.org/web/packages/mclust)
- 1247 Francalacci P, Sanna D (2008) History and geography of human Y-chromosome in  
1248 Europe: a SNP perspective. *Journal of Anthropological Sciences*, **86**, 59–89.

- 1249 Frichot E, Schoville SD, Bouchard G, François O (2013) Testing for associations between  
1250 loci and environmental gradients using latent factor mixed models. *Molecular Biology*  
1251 *and Evolution*, **30**, 1687–1699.
- 1252 Futschik A (2010) The next generation of molecular markers from massively parallel  
1253 sequencing of pooled DNA samples. *Genetics*, **186**, 207–218.
- 1254 González J, Karasov TL, Messer PW, Petrov DA (2010) Genome-Wide Patterns of  
1255 Adaptation to Temperate Environments Associated with Transposable Elements in  
1256 *Drosophila*. *PLoS Genetics*, **6**, e1000905.
- 1257 González J, Lenkov K, Lipatov M, Macpherson JM, Petrov DA (2008) High Rate of Recent  
1258 Transposable Element–Induced Adaptation in *Drosophila melanogaster*. *PLoS Biology*,  
1259 **6**, e251.
- 1260 Goubert C, Modolo L, Vieira C *et al.* (2015) De Novo Assembly and Annotation of the  
1261 Asian Tiger Mosquito (*Aedes albopictus*) Repeatome with dnaPipeTE from Raw  
1262 Genomic Reads and Comparative Analysis with the Yellow Fever Mosquito (*Aedes*  
1263 *aegypti*). *Genome Biology and Evolution*, **7**, 1192–1205.
- 1264 Grabherr MG, Haas BJ, Yassour M *et al.* (2011) Full-length transcriptome assembly from  
1265 RNA-Seq data without a reference genome. *Nature Biotechnology*, **29**, 644–652.
- 1266 Gramates LS, Marygold SJ, Santos GD *et al.* (2017) FlyBase at 25: looking to the future.  
1267 *Nucleic Acids Research*, **45**, D663–D671.
- 1268 Green RM, Smart WM (1985) *Textbook on Spherical Astronomy*. Cambridge University.
- 1269 Grenier JK, Arguello JR, Moreira MC *et al.* (2015) Global Diversity Lines-A Five-Continent  
1270 Reference Panel of Sequenced *Drosophila melanogaster* Strains. *G3*, **5**, 593–603.
- 1271 Guirao-Rico S, González J (2019) Evolutionary insights from large scale resequencing  
1272 datasets in *Drosophila melanogaster*. *Current Opinion in Insect Science*, Insect  
1273 genomics • Development and regulation **31**, 70–76.

- 1274 Haddrill PR, Charlesworth B, Halligan DL, Andolfatto P (2005) Patterns of intron sequence  
1275 evolution in *Drosophila* are dependent upon length and GC content. *Genome Biology*,  
1276 **6**, R67.
- 1277 Hales KG, Korey CA, Larracuente AM, Roberts DM (2015) Genetics on the Fly: A Primer  
1278 on the *Drosophila* Model System. *Genetics*, **201**, 815–842.
- 1279 Hamilton PT, Votýpka J, Dostálová A *et al.* (2015) Infection Dynamics and Immune  
1280 Response in a Newly Described *Drosophila*-Trypanosomatid Association. *mBio*, **6**,  
1281 e01356–15.
- 1282 Handu M, Kaduskar B, Ravindranathan R *et al.* (2015) SUMO-Enriched Proteome for  
1283 *Drosophila* Innate Immune Response. *G3*, **5**, 2137–2154.
- 1284 Harpur BA, Kent CF, Molodtsova D *et al.* (2014) Population genomics of the honey bee  
1285 reveals strong signatures of positive selection on worker traits. *Proceedings of the*  
1286 *National Academy of Sciences of the United States of America*, **111**, 2614–2619.
- 1287 Haselkorn TS, Markow TA, Moran NA (2009) Multiple introductions of the *Spiroplasma*  
1288 bacterial endosymbiont into *Drosophila*. *Molecular Ecology*, **18**, 1294–1305.
- 1289 Hohenlohe PA, Bassham S, Etter PD *et al.* (2010) Population Genomics of Parallel  
1290 Adaptation in Threespine Stickleback using Sequenced RAD Tags. *PLoS Genetics*, **6**,  
1291 e1000862.
- 1292 Hu TT, Eisen MB, Thornton KR, Andolfatto P (2013) A second-generation assembly of the  
1293 *Drosophila simulans* genome provides new insights into patterns of lineage-specific  
1294 divergence. *Genome Research*, **23**, 89–98.
- 1295 Huang DW, Sherman BT, Lempicki RA (2009) Systematic and integrative analysis of large  
1296 gene lists using DAVID bioinformatics resources. *Nature Protocols*, **4**, 44–57.

- 1297 Huang W, Massouras A, Inoue Y *et al.* (2014) Natural variation in genome architecture  
1298 among 205 *Drosophila melanogaster* Genetic Reference Panel lines. *Genome*  
1299 *Research*, **24**, 1193–1208.
- 1300 Hudson RR, Kreitman M, Aguadé M (1987) A test of neutral molecular evolution based on  
1301 nucleotide data. *Genetics*, **116**, 153–159.
- 1302 Hutter S, Li H, Beisswanger S, De Lorenzo D, Stephan W (2007) Distinctly Different Sex  
1303 Ratios in African and European Populations of *Drosophila melanogaster* Inferred From  
1304 Chromosomewide Single Nucleotide Polymorphism Data. *Genetics*, **177**, 469–480.
- 1305 Jorde LB, Watkins WS, Bamshad MJ (2001) Population genomics: a bridge from  
1306 evolutionary history to genetic medicine. *Human Molecular Genetics*, **10**, 2199–2207.
- 1307 Kao JY, Zubair A, Salomon MP, Nuzhdin SV, Campo D (2015) Population genomic  
1308 analysis uncovers African and European admixture in *Drosophila melanogaster*  
1309 populations from the south-eastern United States and Caribbean Islands. *Molecular*  
1310 *Ecology*, **24**, 1499–1509.
- 1311 Kapopoulou A, Kapun M, Pavlidis P, *et al.* (2018a) Early split between African and  
1312 European populations of *Drosophila melanogaster*. Preprint at *bioRxiv*, doi:  
1313 <https://doi.org/10.1101/340422>
- 1314 Kapopoulou A, Pfeifer S, Jensen J, Laurent S (2018b). The demographic history of African  
1315 *Drosophila melanogaster*. Preprint at *bioRxiv*, doi:10.1101/340406
- 1316 Kapitonov VV, Jurka J (2003) Molecular Paleontology of Transposable Elements in the  
1317 *Drosophila melanogaster* Genome. *Proceedings of the National Academy of Sciences*  
1318 *of the United States of America*, **100**, 6569–6574.
- 1319 Kapun M, Flatt T (2019) The adaptive significance of chromosomal inversion  
1320 polymorphisms in *Drosophila melanogaster*. *Molecular Ecology*, **28**, 1263-1282

- 1321 Kapun M, Fabian DK, Goudet J, Flatt T (2016a) Genomic Evidence for Adaptive Inversion  
1322 Clines in *Drosophila melanogaster*. *Molecular Biology and Evolution*, **33**, 1317–1336.
- 1323 Kapun M, Schmidt C, Durmaz E, Schmidt PS, Flatt T (2016b) Parallel effects of the  
1324 inversion *In(3R)Payne* on body size across the North American and Australian clines in  
1325 *Drosophila melanogaster*. *Journal of Evolutionary Biology*, **29**, 1059–1072.
- 1326 Kapun M, van Schalkwyk H, McAllister B, Flatt T, Schlötterer C (2014) Inference of  
1327 chromosomal inversion dynamics from Pool-Seq data in natural and laboratory  
1328 populations of *Drosophila melanogaster*. *Molecular Ecology*, **23**, 1813–1827.
- 1329 Kassis JA, Kennison JA, Tamkun JW (2017) Polycomb and Trithorax Group Genes in  
1330 *Drosophila*. *Genetics*, **206**, 1699–1725.
- 1331 Kauer M, Zangerl B, Dieringer D, Schlötterer C (2002) Chromosomal patterns of  
1332 microsatellite variability contrast sharply in African and non-African populations of  
1333 *Drosophila melanogaster*. *Genetics*, **160**, 247–256.
- 1334 Keller A (2007) *Drosophila melanogaster's* history as a human commensal. *Current*  
1335 *Biology*, **17**, R77–R81.
- 1336 Kennington JW, Partridge L, Hoffmann AA (2006) Patterns of Diversity and Linkage  
1337 Disequilibrium Within the Cosmopolitan Inversion *In(3R)Payne* in *Drosophila*  
1338 *melanogaster* Are Indicative of Coadaptation. *Genetics*, **172**, 1655 – 1663.
- 1339 Kimura M (1984) *The Neutral Theory of Molecular Evolution*. Cambridge University Press.
- 1340 Knibb WR, Oakeshott JG, Gibson JB (1981) Chromosome Inversion Polymorphisms in  
1341 *Drosophila melanogaster*. I. Latitudinal Clines and Associations between Inversions in  
1342 Australasian Populations. *Genetics*, **98**, 833–847.
- 1343 Kofler R, Betancourt AJ, Schlötterer C (2012) Sequencing of pooled DNA samples (Pool-  
1344 Seq) uncovers complex dynamics of transposable element insertions in *Drosophila*  
1345 *melanogaster*. *PLoS Genetics*, **8**, e1002487.



- 1346 Kofler R, Orozco-terWengel P, De Maio N *et al.* (2011) PoPoolation: A Toolbox for  
1347 Population Genetic Analysis of Next Generation Sequencing Data from Pooled  
1348 Individuals. *PLoS ONE*, **6**, e15925.
- 1349 Kolaczkowski B, Hupalo DN, Kern AD (2011a) Recurrent adaptation in RNA interference  
1350 genes across the *Drosophila* phylogeny. *Molecular Biology and Evolution*, **28**, 1033–  
1351 1042.
- 1352 Kolaczkowski B, Kern AD, Holloway AK, Begun DJ (2011b) Genomic Differentiation  
1353 Between Temperate and Tropical Australian Populations of *Drosophila melanogaster*.  
1354 *Genetics*, **187**, 245–260.
- 1355 Korneliussen TS, Moltke I, Albrechtsen A, Nielsen R (2013) Calculation of Tajima's *D* and  
1356 other neutrality test statistics from low depth next-generation sequencing data. *BMC*  
1357 *Bioinformatics*, **14**, 289.
- 1358 Kreitman M (1983) Nucleotide polymorphism at the alcohol dehydrogenase locus of  
1359 *Drosophila melanogaster*. *Nature*, **304**, 412–417.
- 1360 Kriesner P, Conner WR, Weeks AR, Turelli M, Hoffmann AA (2016) Persistence of a  
1361 *Wolbachia* infection frequency cline in *Drosophila melanogaster* and the possible role  
1362 of reproductive dormancy. *Evolution*, **70**, 979–997.
- 1363 Kühn I, Dormann CF (2012) Less than eight (and a half) misconceptions of spatial  
1364 analysis. *Journal of Biogeography*, **39**, 995–998.
- 1365 Lachaise D, Cariou M-L, David JR *et al.* (1988) Historical Biogeography of the *Drosophila*  
1366 *melanogaster* Species Subgroup. In Hecht MK, Wallace B, Prance GT (Eds.)  
1367 *Evolutionary Biology* (pp. 159–225) Boston: Springer.
- 1368 Lack JB, Cardeno CM, Crepeau MW *et al.* (2015) The *Drosophila* genome nexus: a  
1369 population genomic resource of 623 *Drosophila melanogaster* genomes, including 197  
1370 from a single ancestral range population. *Genetics*, **199**, 1229–1241.



- 1371 Lack JB, Lange JD, Tang AD, Corbett-Detig RB, Pool JE (2016) A Thousand Fly  
1372 Genomes: An Expanded *Drosophila* Genome Nexus. *Molecular Biology and Evolution*,  
1373 **33**, 3308–3313.
- 1374 Lang DT (2014) *RJSONIO: Serialize R objects to JSON, JavaScript Object Notation*.  
1375 <https://CRAN.R-project.org/package=RJSONIO>.
- 1376 Langley CH, Stevens K, Cardeno C *et al.* (2012) Genomic variation in natural populations  
1377 of *Drosophila melanogaster*. *Genetics*, **192**, 533–598.
- 1378 Langmead B, Salzberg SL (2012) Fast gapped-read alignment with Bowtie 2. *Nature*  
1379 *Methods*, **9**, 357–359.
- 1380 Larracuente AM, Roberts DM (2015) Genetics on the Fly: A Primer on the *Drosophila*  
1381 Model System. *Genetics* **201**, 815–842.
- 1382 Lawrie DS, Messer PW, Hershberg R, Petrov DA (2013) Strong Purifying Selection at  
1383 Synonymous Sites in *D. melanogaster*. *PLoS Genetics*, **9**, e1003527.
- 1384 Lerat E, Goubert C, Guirao-Rico S, Merenciano M, Dufour A-B, Vieira C, González J  
1385 (2019) Population-specific dynamics and selection patterns of transposable element  
1386 insertions in European natural populations. *Molecular Ecology*, **28**, 1506–1522.
- 1387 Lemeunier F, Aulard S (1992). Inversion polymorphism in *Drosophila melanogaster*. In:  
1388 Krimbas CB, & Powell JR (Eds.), *Drosophila Inversion Polymorphism* (pp. 339–405),  
1389 New York: CRC Press.
- 1390 Lewontin RC (1974) *The Genetic Basis of Evolutionary Change*. Columbia University  
1391 Press.
- 1392 Li H (2013) Aligning sequence reads, clone sequences and assembly contigs with BWA-  
1393 MEM. Preprint at *arXiv.org*, 1303.3997
- 1394 Li H, Durbin R (2009) Fast and accurate short read alignment with Burrows-Wheeler  
1395 transform. *Bioinformatics*, **25**, 1754–1760.

- 1396 Li H, Ruan J, Durbin R (2008) Mapping short DNA sequencing reads and calling variants  
1397 using mapping quality scores. *Genome Research*, **18**, 1851–1858.
- 1398 Lian T, Li D, Tan X, Che T, Xu Z, Fan X, Wu N, Zhang L, Gaur U, Sun B, Yang M (2018)  
1399 Genetic diversity and natural selection in wild fruit flies revealed by whole-genome  
1400 resequencing. *Genomics*, **110**, 304–309.
- 1401 Luikart G, England PR, Tallmon D, Jordan S, Tableret P (2003) The power and promise of  
1402 population genomics: from genotyping to genome typing. *Nature Reviews Genetics*, **4**,  
1403 981–994.
- 1404 Lyne R, Smith R, Rutherford K *et al.* (2007) FlyMine: an integrated database for  
1405 *Drosophila* and *Anopheles* genomics. *Genome Biology*, **8**, R129.
- 1406 Machado HE, Bergland AO, O'Brien KR *et al.* (2016) Comparative population genomics of  
1407 latitudinal variation in *Drosophila simulans* and *Drosophila melanogaster*. *Molecular*  
1408 *Ecology*, **25**, 723–740.
- 1409 Machado H, Bergland AO, Taylor R *et al.* (2018) Broad geographic sampling reveals  
1410 predictable and pervasive seasonal adaptation in *Drosophila*. Preprint at *bioRxiv*, doi:  
1411 <https://doi.org/10.1101/337543>.
- 1412 Mackay TFC, Richards S, Stone EA *et al.* (2012) The *Drosophila melanogaster* Genetic  
1413 Reference Panel. *Nature*, **482**, 173–178.
- 1414 Martin M (2011) Cutadapt removes adapter sequences from high-throughput sequencing  
1415 reads. *EMBnet.journal*, **17**, 10–12.
- 1416 Martino ME, Ma D, Leulier F (2017) Microbial influence on *Drosophila* biology. *Current*  
1417 *Opinion in Microbiology*, **38**, 165–170.
- 1418 Mateo L, Rech GE, González J (2018) Genome-wide patterns of local adaptation in  
1419 *Drosophila melanogaster*: adding intra European variability to the map. Preprint at  
1420 *bioRxiv*, doi: <https://doi.org/10.1101/269332>

- 1421 Matthias P, Yoshida M, Khochbin S (2008) HDAC6 a new cellular stress surveillance  
1422 factor. *Cell Cycle*, **7**, 7–10.
- 1423 McDonald JH, Kreitman M (1991) Adaptive protein evolution at the *Adh* locus in  
1424 *Drosophila*. *Nature*, **351**, 652–654.
- 1425 McKenna A, Hanna M, Banks E *et al.* (2010) The Genome Analysis Toolkit: A MapReduce  
1426 framework for analysing next-generation DNA sequencing data. *Genome Research*,  
1427 **20**, 1297–1303.
- 1428 Menozzi P, Piazza A, Cavalli-Sforza L (1978) Synthetic maps of human gene frequencies  
1429 in Europeans. *Science*, **201**, 786–792.
- 1430 Messer PW, Petrov DA (2013) Population genomics of rapid adaptation by soft selective  
1431 sweeps. *Trends in Ecology & Evolution*, **28**, 659–669.
- 1432 Mettler LE, Voelker RA, Mukai T (1977) Inversion Clines in Populations of *Drosophila*  
1433 *melanogaster*. *Genetics*, **87**, 169–176.
- 1434 Meyer F, Paarmann D, D'Souza M *et al.* (2008) The metagenomics RAST server - a public  
1435 resource for the automatic phylogenetic and functional analysis of metagenomes. *BMC*  
1436 *Bioinformatics*, **9**, 386.
- 1437 Micallef L, Rodgers P (2014) eulerAPE: drawing area-proportional 3-Venn diagrams using  
1438 ellipses. *PLoS ONE*, **9**, e101717.
- 1439 Michalakis Y, Veuille M (1996) Length variation of CAG/CAA trinucleotide repeats in  
1440 natural populations of *Drosophila melanogaster* and its relation to the recombination  
1441 rate. *Genetics*, **143**, 1713–1725.
- 1442 Moran PAP (1950) Notes on Continuous Stochastic Phenomena. *Biometrika*, **37**, 17.
- 1443 Nei M (1987) *Molecular Evolutionary Genetics*. Columbia University Press.
- 1444 Nielsen R, Akey JM, Jakobsson M *et al.* (2017) Tracing the peopling of the world through  
1445 genomics. *Nature*, **541**, 302-310.

- 1446 Nolte V, Pandey RV, Kofler R, Schlötterer C (2013) Genome-wide patterns of natural  
1447 variation reveal strong selective sweeps and ongoing genomic conflict in *Drosophila*  
1448 *mauritiana*. *Genome Research*, **23**, 99–110.
- 1449 Novembre J, Stephens M (2008) Interpreting principal component analyses of spatial  
1450 population genetic variation. *Nature Genetics*, **40**, 646–649.
- 1451 Novembre J, Johnson T, Bryc K, *et al.* (2008) Genes mirror geography within Europe.  
1452 *Nature*, **456**, 98-101.
- 1453 Nunes MDS, Neumeier H, Schlötterer C (2008) Contrasting patterns of natural variation in  
1454 global *Drosophila melanogaster* populations. *Molecular Ecology*, **17**, 4470–4479.
- 1455 Okonechnikov K, Conesa A, García-Alcalde F (2016) Qualimap 2: advanced multi-sample  
1456 quality control for high-throughput sequencing data. *Bioinformatics*, **32**, 292–294.
- 1457 Palmer WH, Medd NC, Beard PM, Obbard DJ (2018) Isolation of a natural DNA virus of  
1458 *Drosophila melanogaster*, and characterisation of host resistance and immune  
1459 responses. *PLOS Pathogens*, **14**, e1007050
- 1460 Parsch J, Novozhilov S, Saminadin-Peter SS, Wong KM, Andolfatto P (2010) On the utility  
1461 of short intron sequences as a reference for the detection of positive and negative  
1462 selection in *Drosophila*. *Molecular Biology and Evolution*, **27**, 1226–1234.
- 1463 Peel MC, Finlayson BL, McMahon TA (2007) Updated world map of the Köppen-Geiger  
1464 climate classification. *Hydrology and Earth System Sciences*, **11**, 1633–1644.
- 1465 Petrov DA, Fiston-Lavier AS, Lipatov M, Lenkov K, González J (2011) Population  
1466 Genomics of Transposable Elements in *Drosophila melanogaster*. *Molecular Biology*  
1467 *and Evolution*, **28**, 1633–1644.
- 1468 Pool JE (2015) The Mosaic Ancestry of the *Drosophila* Genetic Reference Panel and the  
1469 *D. melanogaster* Reference Genome Reveals a Network of Epistatic Fitness  
1470 Interactions. *Molecular Biology and Evolution*, **32**, 3236–3251.

- 1471 Pool JE, Nielsen R (2007) Population size changes reshape genomic patterns of diversity.  
1472 *Evolution*, **61**, 3001–3006.
- 1473 Pool JE, Braun DT, Lack JB (2016) Parallel Evolution of Cold Tolerance Within *Drosophila*  
1474 *melanogaster*. *Molecular Biology and Evolution*, **34**, 349–360.
- 1475 Pool JE, Corbett-Detig RB, Sugino RP *et al.* (2012) Population Genomics of Sub-Saharan  
1476 *Drosophila melanogaster*: African Diversity and Non-African Admixture. *PLoS*  
1477 *Genetics*, **8**, e1003080.
- 1478 Powell JR (1997) *Progress and Prospects in Evolutionary Biology: The Drosophila Model*.  
1479 Oxford University Press.
- 1480 R Development Core Team (2009) R: A Language and Environment for Statistical  
1481 Computing. *R-project.org*.
- 1482 Rako L, Anderson AR, Sgrò CM, Stocker AJ, Hoffmann AA (2006) The association  
1483 between inversion *In(3R)Payne* and clinally varying traits in *Drosophila melanogaster*.  
1484 *Genetica*, **128**, 373–384.
- 1485 Rane RV, Rako L, Kapun M, LEE SF (2015) Genomic evidence for role of inversion *3RP*  
1486 of *Drosophila melanogaster* in facilitating climate change adaptation. *Molecular*  
1487 *Ecology*, **24**, 2423–2432.
- 1488 Rech GE, Bogaerts-Márquez M, Barrón MG, Merenciano M, Villanueva-Cañas JL, Horváth  
1489 V, Fiston-Lavier A-S, Luyten I, Venkataram S, Quesneville H, Petrov DA, González J  
1490 (2019) Stress response, behavior, and development are shaped by transposable  
1491 element-induced mutations in *Drosophila*. *PLOS Genetics*, **15**, e1007900.
- 1492 Reinhardt JA, Kolaczkowski B, Jones CD, Begun DJ, Kern AD (2014) Parallel Geographic  
1493 Variation in *Drosophila melanogaster*. *Genetics*, **197**, 361–373.
- 1494 Richardson MF, Weinert LA, Welch JJ *et al.* (2012) Population Genomics of the *Wolbachia*  
1495 Endosymbiont in *Drosophila melanogaster*. *PLoS Genetics*, **8**, e1003129.

- 1496 Rogers RL, Hartl DL (2012) Chimeric genes as a source of rapid evolution in *Drosophila*  
1497 *melanogaster*. *Molecular Biology and Evolution*, **29**, 517–529.
- 1498 Rozas J, Ferrer-Mata A, Sánchez-DelBarrio JC *et al.* (2017) DnaSP 6: DNA Sequence  
1499 Polymorphism Analysis of Large Datasets. *Molecular Biology and Evolution*, **34**, 3299–  
1500 3302.
- 1501 Salmela L, Schröder J (2011) Correcting errors in short reads by multiple alignments.  
1502 *Bioinformatics*, **27**, 1455–1461.
- 1503 Schlenke TA, Begun DJ (2003) Natural selection drives *Drosophila* immune system  
1504 evolution. *Genetics*, **164**, 1471–1480.
- 1505 Schlötterer C, Neumeier H, Sousa C, Nolte V (2006) Highly structured Asian *Drosophila*  
1506 *melanogaster* populations: a new tool for hitchhiking mapping? *Genetics*, **172**, 287–  
1507 292.
- 1508 Schlötterer C, Tobler R, Kofler R, Nolte V (2014) Sequencing pools of individuals - mining  
1509 genome-wide polymorphism data without big funding. *Nature Reviews Genetics*, **15**,  
1510 749–763.
- 1511 Schmidt JM, Good RT, Appleton B *et al.* (2010) Copy number variation and transposable  
1512 elements feature in recent, ongoing adaptation at the *Cyp6g1* locus. *PLoS Genetics*, **6**,  
1513 e1000998.
- 1514 Schmidt PS, Paaby AB (2008) Reproductive Diapause and Life-History Clines in North  
1515 American Populations of *Drosophila melanogaster*. *Evolution*, **62**, 1204–1215.
- 1516 Schmidt PS, Zhu CT, Das J *et al.* (2008) An amino acid polymorphism in the *couch potato*  
1517 gene forms the basis for climatic adaptation in *Drosophila melanogaster*. *Proceedings*  
1518 *of the National Academy of Sciences of the United States of America*, **105**, 16207–  
1519 16211.

- 1520 Sella G, Petrov DA, Przeworski M, Andolfatto P (2009) Pervasive Natural Selection in the  
1521 *Drosophila* Genome? *PLoS Genetics*, **5**, e1000495.
- 1522 Singh ND, Arndt PF, Clark AG, Aquadro CF (2009) Strong evidence for lineage and  
1523 sequence specificity of substitution rates and patterns in *Drosophila*. *Molecular Biology*  
1524 *and Evolution*, **26**, 1591–1605.
- 1525 Slatkin M. 1985. Gene Flow in Natural Populations. *Annual Review of Ecology and*  
1526 *Systematics* **16**:393–430.
- 1527 Staubach F, Baines JF, Künzel S, Bik EM, Petrov DA (2013) Host species and  
1528 environmental effects on bacterial communities associated with *Drosophila* in the  
1529 laboratory and in the natural environment. *PLoS ONE*, **8**, e70749.
- 1530 Stephan W (2010) Genetic hitchhiking versus background selection: the controversy and  
1531 its implications. *Philosophical Transactions of the Royal Society of London B*, **365**,  
1532 1245–1253.
- 1533 Tajima F (1989) Statistical method for testing the neutral mutation hypothesis by DNA  
1534 polymorphism. *Genetics*, **123**, 585–595.
- 1535 Tajima F (1983) Evolutionary relationship of DNA sequences in finite populations.  
1536 *Genetics* **105**, 437–460.
- 1537 Thurmond J, Goodman JL, Strelets VB, Attrill H, Gramates LS, Marygold SJ, Matthews  
1538 BB, Millburn G, Antonazzo G, Trovisco V, Kaufman TC, Calvi BR, FlyBase Consortium  
1539 (2019) FlyBase 2.0: the next generation. *Nucleic Acids Res*, **47**, D759–D765.
- 1540 Trinder M, Daisley BA, Dube JS, Reid G (2017) *Drosophila melanogaster* as a High-  
1541 Throughput Model for Host-Microbiota Interactions. *Frontiers in Microbiology*, **8**, 751.
- 1542 Turner TL, Levine MT, Eckert ML, Begun DJ (2008) Genomic analysis of adaptive  
1543 differentiation in *Drosophila melanogaster*. *Genetics*, **179**, 455–473.



- 1544 Umina PA, Weeks AR, Kearney MR, McKechnie SW, Hoffmann AA (2005) A rapid shift in  
1545 a classic clinal pattern in *Drosophila* reflecting climate change. *Science*, **308**, 691–693.
- 1546 Unckless RL (2011) A DNA virus of *Drosophila*. *PLoS ONE*, **6**, e26564.
- 1547 Walters AM, Matthews MK, Hughes R, Malcolm Jaanna, Rudman S, Newell PD, Douglas  
1548 AE, Schmidt PS, Chaston JM (2018) The microbiota influences the *Drosophila*  
1549 *melanogaster* life history strategy. bioRxiv. 471540
- 1550 Wang Y, Kapun M, Waidele L, Kuenzel S, Bergland AO, Staubach F (2019) Continent-  
1551 wide structure of bacterial microbiomes of European *Drosophila melanogaster*  
1552 suggests host-control. bioRxiv. 527531
- 1553 Wang Y, Staubach F (2018); Individual variation of natural *D.melanogaster*-associated  
1554 bacterial communities, *FEMS Microbiology Letters*, **365**, fny017
- 1555 Watterson GA (1975) On the number of segregating sites in genetical models without  
1556 recombination. *Theoretical Population Biology*, **7**, 256–276.
- 1557 Webster CL, Longdon B, Lewis SH, Obbard DJ (2016) Twenty-Five New Viruses  
1558 Associated with the Drosophilidae (Diptera). *Evolutionary Bioinformatics Online*, **12**,  
1559 13–25.
- 1560 Webster CL, Waldron FM, Robertson S *et al.* (2015) The Discovery, Distribution, and  
1561 Evolution of Viruses Associated with *Drosophila melanogaster*. *PLoS Biology*, **13**,  
1562 e1002210.
- 1563 Weir BS, Cockerham CC (1984) Estimating *F*-Statistics for the Analysis of Population  
1564 Structure. *Evolution*, **38**, 1358–1370.
- 1565 Werren JH, Baldo L, Clark ME (2008) Wolbachia: master manipulators of invertebrate  
1566 biology. *Nature Reviews Microbiology*, **6**, 741–751.
- 1567 Wickham H (2016) *ggplot2: Elegant Graphics for Data Analysis*. Springer.



- 1568 Wilfert L, Longdon B, Ferreira AGA, Bayer F, Jiggins FM (2011) Trypanosomatids are  
1569 common and diverse parasites of *Drosophila*. *Parasitology*, **138**, 858–865.
- 1570 Wolf JBW, Bayer T, Haubold B *et al.* (2010) Nucleotide divergence vs. gene expression  
1571 differentiation: comparative transcriptome sequencing in natural isolates from the  
1572 carrion crow and its hybrid zone with the hooded crow. *Molecular Ecology*, **19**, 162–  
1573 175.
- 1574 Wolff JN, Camus MF, Clancy DJ, Dowling DK (2016) Complete mitochondrial genome  
1575 sequences of thirteen globally sourced strains of fruit fly (*Drosophila melanogaster*)  
1576 form a powerful model for mitochondrial research. *Mitochondrial DNA Part A*, **27**,  
1577 4672–4674.
- 1578 Xiao F-X, Yotova V, Zietkiewicz E *et al.* (2004) Human X-chromosomal lineages in Europe  
1579 reveal Middle Eastern and Asiatic contacts. *European Journal of Human Genetics*, **12**,  
1580 301–311.
- 1581 Yukilevich R, True JR (2008a) Incipient sexual isolation among cosmopolitan *Drosophila*  
1582 *melanogaster* populations. *Evolution*, **62**, 2112–2121.
- 1583 Yukilevich R, True JR (2008b) African morphology, behavior and pheromones underlie  
1584 incipient sexual isolation between us and Caribbean *Drosophila melanogaster*.  
1585 *Evolution*, **62**, 2807–2828.
- 1586 Yukilevich R, Turner TL, Aoki F, Nuzhdin SV, True JR (2010) Patterns and processes of  
1587 genome-wide divergence between North American and African *Drosophila*  
1588 *melanogaster*. *Genetics*, **186**, 219–239.
- 1589 Zanini F, Brodin J, Thebo L *et al.* (2015) Population genomics of inpatient HIV-1  
1590 evolution. *eLife*, **4**, e11282.
- 1591

1592 **Tables**

1593 **Table 1. Sample information for all populations in the *DrosEU* dataset.** Origin, collection date, season and sample size (number of  
 1594 chromosomes: *n*) of the 48 samples in the *DrosEU* 2014 data set. Additional information can be found in Table S1.

| ID           | Country        | Location          | Coll. Date | Number |  | Lat (°) | Lon (°) | Alt (m) | Season | n  | Coll. name                                |
|--------------|----------------|-------------------|------------|--------|--|---------|---------|---------|--------|----|-------------------------------------------|
|              |                |                   |            | ID     |  |         |         |         |        |    |                                           |
| AT_Mau_14_01 | Austria        | Mauternbach       | 2014-07-20 | 1      |  | 48.38   | 15.56   | 572     | S      | 80 | Andrea J. Betancourt                      |
| AT_Mau_14_02 | Austria        | Mauternbach       | 2014-10-19 | 2      |  | 48.38   | 15.56   | 572     | F      | 80 | Andrea J. Betancourt                      |
| TR_Yes_14_03 | Turkey         | Yesiloz           | 2014-08-31 | 3      |  | 40.23   | 32.26   | 680     | S      | 80 | Banu Sebnem Onder                         |
| TR_Yes_14_04 | Turkey         | Yesiloz           | 2014-10-23 | 4      |  | 40.23   | 32.26   | 680     | F      | 80 | Banu Sebnem Onder<br>Catherine Montchamp- |
| FR_Vil_14_05 | France         | Viltain           | 2014-08-18 | 5      |  | 48.75   | 2.16    | 153     | S      | 80 | Moreau<br>Catherine Montchamp-            |
| FR_Vil_14_07 | France         | Viltain           | 2014-10-27 | 7      |  | 48.75   | 2.16    | 153     | F      | 80 | Moreau                                    |
| FR_Got_14_08 | France         | Gotheron          | 2014-07-08 | 8      |  | 44.98   | 4.93    | 181     | S      | 80 | Cristina Vieira                           |
| UK_She_14_09 | United Kingdom | Sheffield         | 2014-08-25 | 9      |  | 53.39   | -1.52   | 100     | S      | 80 | Damiano Porcelli                          |
| UK_Sou_14_10 | United Kingdom | South Queensferry | 2014-07-14 | 10     |  | 55.97   | -3.35   | 19      | S      | 80 | Darren Obbard                             |
| CY_Nic_14_11 | Cyprus         | Nicosia           | 2014-08-10 | 11     |  | 35.07   | 33.32   | 263     | S      | 80 | Eliza Argyridou                           |
| UK_Mar_14_12 | United Kingdom | Market Harborough | 2014-10-20 | 12     |  | 52.48   | -0.92   | 80      | F      | 80 | Eran Tauber                               |
| UK_Lut_14_13 | United Kingdom | Lutterworth       | 2014-10-20 | 13     |  | 52.43   | -1.10   | 126     | F      | 80 | Eran Tauber                               |

|              |          |                 |            |    |       |       |     |   |    |                      |
|--------------|----------|-----------------|------------|----|-------|-------|-----|---|----|----------------------|
| DE_Bro_14_14 | Germany  | Broggingen      | 2014-06-26 | 14 | 48.22 | 7.82  | 173 | S | 80 | Fabian Staubach      |
| DE_Bro_14_15 | Germany  | Broggingen      | 2014-10-15 | 15 | 48.22 | 7.82  | 173 | F | 80 | Fabian Staubach      |
| UA_Yal_14_16 | Ukraine  | Yalta           | 2014-06-20 | 16 | 44.50 | 34.17 | 72  | S | 80 | Iryna Kozeretska     |
| UA_Yal_14_18 | Ukraine  | Yalta           | 2014-08-27 | 18 | 44.50 | 34.17 | 72  | S | 80 | Iryna Kozeretska     |
| UA_Ode_14_19 | Ukraine  | Odesa           | 2014-07-03 | 19 | 46.44 | 30.77 | 54  | S | 80 | Iryna Kozeretska     |
| UA_Ode_14_20 | Ukraine  | Odesa           | 2014-07-22 | 20 | 46.44 | 30.77 | 54  | S | 80 | Iryna Kozeretska     |
| UA_Ode_14_21 | Ukraine  | Odesa           | 2014-08-29 | 21 | 46.44 | 30.77 | 54  | S | 80 | Iryna Kozeretska     |
| UA_Ode_14_22 | Ukraine  | Odesa           | 2014-10-10 | 22 | 46.44 | 30.77 | 54  | F | 80 | Iryna Kozeretska     |
| UA_Kyi_14_23 | Ukraine  | Kyiv            | 2014-08-09 | 23 | 50.34 | 30.49 | 179 | S | 80 | Iryna Kozeretska     |
| UA_Kyi_14_24 | Ukraine  | Kyiv            | 2014-09-08 | 24 | 50.34 | 30.49 | 179 | F | 80 | Iryna Kozeretska     |
| UA_Var_14_25 | Ukraine  | Varva           | 2014-08-18 | 25 | 50.48 | 32.71 | 125 | S | 80 | Oleksandra Protsenko |
| UA_Pyr_14_26 | Ukraine  | Pyriatyn        | 2014-08-20 | 26 | 50.25 | 32.52 | 114 | S | 80 | Oleksandra Protsenko |
| UA_Dro_14_27 | Ukraine  | Drogobych       | 2014-08-24 | 27 | 49.33 | 23.50 | 275 | S | 80 | Iryna Kozeretska     |
| UA_Cho_14_28 | Ukraine  | Chornobyl       | 2014-09-13 | 28 | 51.37 | 30.14 | 121 | F | 80 | Iryna Kozeretska     |
| UA_Cho_14_29 | Ukraine  | Chornobyl Yaniv | 2014-09-13 | 29 | 51.39 | 30.07 | 121 | F | 80 | Iryna Kozeretska     |
| SE_Lun_14_30 | Sweden   | Lund            | 2014-07-31 | 30 | 55.69 | 13.20 | 51  | S | 80 | Jessica Abbott       |
| DE_Mun_14_31 | Germany  | Munich          | 2014-06-19 | 31 | 48.18 | 11.61 | 520 | S | 80 | John Parsch          |
| DE_Mun_14_32 | Germany  | Munich          | 2014-09-03 | 32 | 48.18 | 11.61 | 520 | F | 80 | John Parsch          |
| PT_Rec_14_33 | Portugal | Recarei         | 2014-09-26 | 33 | 41.15 | -8.41 | 175 | F | 80 | Jorge Vieira         |

|              |             |                    |            |    |       |       |     |   |    |                     |
|--------------|-------------|--------------------|------------|----|-------|-------|-----|---|----|---------------------|
| ES_Gim_14_34 | Spain       | Gimenells (Lleida) | 2014-10-20 | 34 | 41.62 | 0.62  | 173 | F | 80 | Lain Guio           |
| ES_Gim_14_35 | Spain       | Gimenells (Lleida) | 2014-08-13 | 35 | 41.62 | 0.62  | 173 | S | 80 | Lain Guio           |
| FI_Aka_14_36 | Finland     | Akaa               | 2014-07-25 | 36 | 61.10 | 23.52 | 88  | S | 80 | Maaria Kankare      |
| FI_Aka_14_37 | Finland     | Akaa               | 2014-08-27 | 37 | 61.10 | 23.52 | 88  | S | 80 | Maaria Kankare      |
| FI_Ves_14_38 | Finland     | Vesanto            | 2014-07-26 | 38 | 62.55 | 26.24 | 121 | S | 66 | Maaria Kankare      |
| DK_Kar_14_39 | Denmark     | Karensminde        | 2014-09-01 | 39 | 55.95 | 10.21 | 15  | F | 80 | Mads Fristrup Schou |
| DK_Kar_14_41 | Denmark     | Karensminde        | 2014-11-25 | 41 | 55.95 | 10.21 | 15  | F | 80 | Mads Fristrup Schou |
| CH_Cha_14_42 | Switzerland | Chalet à Gobet     | 2014-07-24 | 42 | 46.57 | 6.70  | 872 | S | 80 | Martin Kapun        |
| CH_Cha_14_43 | Switzerland | Chalet à Gobet     | 2014-10-05 | 43 | 46.57 | 6.70  | 872 | F | 80 | Martin Kapun        |
| AT_See_14_44 | Austria     | Seeboden           | 2014-08-17 | 44 | 46.81 | 13.51 | 591 | S | 80 | Martin Kapun        |
| UA_Kha_14_45 | Ukraine     | Kharkiv            | 2014-07-26 | 45 | 49.82 | 36.05 | 141 | S | 80 | Svitlana Serga      |
| UA_Kha_14_46 | Ukraine     | Kharkiv            | 2014-09-14 | 46 | 49.82 | 36.05 | 141 | F | 80 | Svitlana Serga      |
|              |             | Chornobyl          |            |    |       |       |     |   |    |                     |
| UA_Cho_14_47 | Ukraine     | Applegarden        | 2014-09-13 | 47 | 51.27 | 30.22 | 121 | F | 80 | Svitlana Serga      |
| UA_Cho_14_48 | Ukraine     | Chornobyl Polisske | 2014-09-13 | 48 | 51.28 | 29.39 | 121 | F | 70 | Svitlana Serga      |
| UA_Kyi_14_49 | Ukraine     | Kyiv               | 2014-10-11 | 49 | 50.34 | 30.49 | 179 | F | 80 | Svitlana Serga      |
| UA_Uma_14_50 | Ukraine     | Uman               | 2014-10-01 | 50 | 48.75 | 30.21 | 214 | F | 80 | Svitlana Serga      |
| RU_Val_14_51 | Russia      | Valday             | 2014-08-17 | 51 | 57.98 | 33.24 | 217 | S | 80 | Elena Pasyukova     |

1596 **Table 2. Clinality of genetic variation and population structure.** Effects of geographic variables and/or seasonality on genome-wide  
 1597 average levels of diversity ( $\pi$ ,  $\theta$  and Tajima's  $D$ ; top rows) and on the first three axes of a PCA based on allele frequencies at neutrally  
 1598 evolving sites (bottom rows). The values represent  $F$ -ratios from general linear models. Bold type indicates  $F$ -ratios that are significant  
 1599 after Bonferroni correction (adjusted  $\alpha=0.0055$ ). Asterisks in parentheses indicate significance when accounting for spatial  
 1600 autocorrelation by spatial error models. These models were only calculated when Moran's  $I$  test, as shown in the last column, was  
 1601 significant. \* $p < 0.05$ ; \*\* $p < 0.01$ ; \*\*\* $p < 0.001$ .

| <b>Factor</b>    | <b>Latitude</b> | <b>Longitude</b>      | <b>Altitude</b> | <b>Season</b> | <b>Moran's I</b> |
|------------------|-----------------|-----------------------|-----------------|---------------|------------------|
| $\pi_{(X)}$      | 4.11*           | 1.62                  | <b>15.23***</b> | 1.65          | 0.86             |
| $\pi_{(Aut)}$    | 0.91            | 2.54                  | <b>27.18***</b> | 0.16          | -0.86            |
| $\theta_{(X)}$   | 2.65            | 1.31                  | <b>15.54***</b> | 2.22          | 0.24             |
| $\theta_{(Aut)}$ | 0.48            | 1.44                  | <b>13.66***</b> | 0.37          | -1.13            |
| $D_{(X)}$        | 0.02            | 0.38                  | 5.93*           | 3.26          | -2.08            |
| $D_{(Aut)}$      | 0.09            | 0.76                  | 5.33*           | 0.71          | -1.45            |
| PC1              | 0.06            | <b>120.72***(***)</b> | 5.35*(*)        | 2.53          | 4.15***          |
| PC2              | 3.5             | <b>10.22**</b>        | <b>15.21***</b> | 1.97          | -1.96            |
| PC3              | 0.14            | 0.11                  | 0.01            | 1.29          | 0.22             |

1602

1603 **Table 3. Clinality and/or seasonality of chromosomal inversions.** The values represent *F*-ratios from generalized linear models with  
 1604 a binomial error structure to account for frequency data. Bold type indicates deviance values that were significant after Bonferroni  
 1605 correction (adjusted  $\alpha'=0.0071$ ). Stars in parentheses indicate significance when accounting for spatial autocorrelation by spatial error  
 1606 models. These models were only calculated when Moran's *I* test, as shown in the last column, was significant. \* $p < 0.05$ ; \*\* $p < 0.01$ ; \*\*\* $p$   
 1607  $< 0.001$   
 1608

| <i>Factor</i>      | <i>Latitude</i>     | <i>Longitude</i> | <i>Altitude</i> | <i>Season</i> | <i>Moran's I</i> |
|--------------------|---------------------|------------------|-----------------|---------------|------------------|
| <i>In(2L)t</i>     | 2.2                 | <b>10.09**</b>   | <b>43.94***</b> | 0.89          | -0.92            |
| <i>In(2R)NS</i>    | 0.25                | <b>14.43***</b>  | 2.88            | 2.43          | 1.25             |
| <i>In(3L)P</i>     | <b>21.78***</b>     | 2.82             | 0.62            | 3.6           | -1.61            |
| <i>In(3R)C</i>     | <b>18.5***(***)</b> | 0.75             | 1.42            | 0.04          | 2.79**           |
| <i>In(3R)Mo</i>    | 0.3                 | 0.09             | 0.35            | 0.03          | -0.9             |
| <i>In(3R)Payne</i> | <b>43.47***</b>     | 0.66             | 1.69            | 1.55          | -0.89            |

1609

1610 **Supplementary Files**

1611 Supplementary File 1. Supplementary Tables.

1612 This file contains the 13 supplementary tables mention in the text.

1613 Supplementary File 2. Additional methods.

1614 This file contains the additional methods mention in the text.
