1 **Genomic analysis of European *Drosophila melanogaster* populations reveals**  
2 **longitudinal structure, continent-wide selection, and previously unknown DNA viruses**

3  
4 Martin Kapun<sup>1,2,3,4,†,\*</sup>, Maite G. Barrón<sup>1,5,\*</sup>, Fabian Staubach<sup>1,6,§</sup>, Darren J. Obbard<sup>1,7</sup>, R. Axel W.  
5 Wiberg<sup>1,8,9</sup>, Jorge Vieira<sup>1,10,11</sup>, Clément Goubert<sup>1,12,13</sup>, Omar Rota-Stabelli<sup>1,14</sup>, Maaria Kankare<sup>1,15,§</sup>,  
6 María Bogaerts-Márquez<sup>1,5</sup>, Annabelle Haudry<sup>1,12</sup>, Lena Waidele<sup>1,6</sup>, Iryna Kozeretska<sup>1,16,17</sup>, Elena G.  
7 Pasyukova<sup>1,18</sup>, Volker Loeschcke<sup>1,19</sup>, Marta Pascual<sup>1,20</sup>, Cristina P. Vieira<sup>1,10,11</sup>, Svitlana Serga<sup>1,16</sup>,  
8 Catherine Montchamp-Moreau<sup>1,21</sup>, Jessica Abbott<sup>1,22</sup>, Patricia Gibert<sup>1,12</sup>, Damiano Porcelli<sup>1,23</sup>, Nico  
9 Posnien<sup>1,24</sup>, Alejandro Sánchez-Gracia<sup>1,20</sup>, Sonja Grath<sup>1,25</sup>, Élio Sucena<sup>1,26,27</sup>, Alan O. Bergland<sup>1,28,§</sup>,  
10 Maria Pilar Garcia Guerreiro<sup>1,29</sup>, Banu Sebnem Onder<sup>1,30</sup>, Eliza Argyridou<sup>1,25</sup>, Lain Guio<sup>1,5</sup>, Mads  
11 Fristrup Schou<sup>1,19,22</sup>, Bart Deplancke<sup>1,31</sup>, Cristina Vieira<sup>1,12</sup>, Michael G. Ritchie<sup>1,8</sup>, Bas J. Zwaan<sup>1,32</sup>,  
12 Eran Tauber<sup>1,33</sup>, Dorcas J. Orengo<sup>1,20</sup>, Eva Puerma<sup>1,20</sup>, Montserrat Aguadé<sup>1,20</sup>, Paul S. Schmidt<sup>1,34,§</sup>,  
13 John Parsch<sup>1,25</sup>, Andrea J. Betancourt<sup>1,35</sup>, Thomas Flatt<sup>1,2,3,†,\*.§</sup>, Josefa González<sup>1,5,†,\*.§</sup>

14  
15 <sup>1</sup> The European *Drosophila* Population Genomics Consortium (*DrosEU*). <sup>2</sup> Department of Ecology  
16 and Evolution, University of Lausanne, CH-1015 Lausanne, Switzerland. <sup>3</sup> Department of Biology,  
17 University of Fribourg, CH-1700 Fribourg, Switzerland. <sup>4</sup> Current affiliations: Department of  
18 Evolutionary Biology and Environmental Sciences, University of Zürich, CH-8057 Zürich,  
19 Switzerland; Division of Cell and Developmental Biology, Medical University of Vienna, AT-1090  
20 Vienna, Austria. <sup>5</sup> Institute of Evolutionary Biology, CSIC- Universitat Pompeu Fabra, Barcelona,  
21 Spain. <sup>6</sup> Department of Evolutionary Biology and Ecology, University of Freiburg, 79104 Freiburg,  
22 German. <sup>7</sup> Institute of Evolutionary Biology, University of Edinburgh, Edinburgh, United Kingdom. <sup>8</sup>  
23 Centre for Biological Diversity, School of Biology, University of St. Andrews, St Andrews, United  
24 Kingdom. <sup>9</sup> Department of Environmental Sciences, Zoological Institute, University of Basel, Basel,  
25 CH-4051, Switzerland. <sup>10</sup> Instituto de Biologia Molecular e Celular (IBMC) University of Porto, Porto,  
26 Portugal. <sup>11</sup> Instituto de Investigação e Inovação em Saúde (I3S), University of Porto, Porto, Portugal.  
27 <sup>12</sup> Laboratoire de Biométrie et Biologie Evolutive, UMR CNRS 5558, University Lyon 1, Lyon,  
28 France. <sup>13</sup> Department of Molecular Biology and Genetics, 107 Biotechnology Building, Cornell

29 University, Ithaca, New York 14853, USA.<sup>14</sup> Research and Innovation Centre, Fondazione Edmund  
30 Mach, San Michele all' Adige, Italy.<sup>15</sup> Department of Biological and Environmental Science,  
31 University of Jyväskylä, Jyväskylä, Finland.<sup>16</sup> General and Medical Genetics Department, Taras  
32 Shevchenko National University of Kyiv, Kyiv, Ukraine.<sup>17</sup> State Institution National Antarctic Center  
33 of Ministry of Education and Science of Ukraine, 16 Taras Shevchenko Blvd., 01601, Kyiv, Ukraine.  
34 <sup>18</sup> Laboratory of Genome Variation, Institute of Molecular Genetics of RAS, Moscow, Russia.<sup>19</sup>  
35 Department of Bioscience - Genetics, Ecology and Evolution, Aarhus University, Aarhus C,  
36 Denmark.<sup>20</sup> Departament de Genètica, Microbiologia i Estadística, Facultat de Biologia and Institut  
37 de Recerca de la Biodiversitat (IRBio), Universitat de Barcelona, Barcelona, Spain.<sup>21</sup> Laboratoire  
38 Evolution, Génomes, Comportement et Ecologie (EGCE) UMR 9191 CNRS - UMR247 IRD -  
39 Université Paris Sud - Université Paris Saclay. 91198 Gif sur Yvette Cedex, France.<sup>22</sup> Department of  
40 Biology, Section for Evolutionary Ecology, Lund, Sweden.<sup>23</sup> Department of Animal and Plant  
41 Sciences, Sheffield, United Kingdom.<sup>24</sup> Universität Göttingen, Johann-Friedrich-Blumenbach-Institut  
42 für Zoologie und Anthropologie, Göttingen, Germany.<sup>25</sup> Division of Evolutionary Biology, Faculty of  
43 Biology, Ludwig-Maximilians-Universität München, Planegg, Germany.<sup>26</sup> Instituto Gulbenkian de  
44 Ciência, Oeiras, Portugal.<sup>27</sup> Departamento de Biologia Animal, Faculdade de Ciências da  
45 Universidade de Lisboa, Lisboa, Portugal.<sup>28</sup> Department of Biology, University of Virginia,  
46 Charlottesville, VA, USA.<sup>29</sup> Departament de Genètica i Microbiologia, Universitat Autònoma de  
47 Barcelona, Barcelona, Spain.<sup>30</sup> Department of Biology, Faculty of Science, Hacettepe University,  
48 Ankara, Turkey.<sup>31</sup> Laboratory of Systems Biology and Genetics, EPFL-SV-IBI-UPDEPLA, CH-1015  
49 Lausanne, Switzerland.<sup>32</sup> Laboratory of Genetics, Department of Plant Sciences, Wageningen  
50 University, Wageningen, Netherlands.<sup>33</sup> Department of Evolutionary and Environmental Biology and  
51 Institute of Evolution, University of Haifa, Haifa, Israel.<sup>34</sup> Department of Biology, University of  
52 Pennsylvania, Philadelphia, USA.<sup>35</sup> Institute of Integrative Biology, University of Liverpool,  
53 Liverpool, United Kingdom.

54 † Co-correspondence: martin.kapun@uzh.ch, thomas.flatt@unifr.ch, josefa.gonzalez@ibe.upf-csic.es

55 \* These authors contributed equally to this work

56 § Members of the *Drosophila* Real Time Evolution (Dros-RTEC) Consortium

## 57 **Abstract**

58 Genetic variation is the fuel of evolution, with standing genetic variation especially important for  
59 short-term evolution and local adaptation. To date, studies of spatio-temporal patterns of genetic  
60 variation in natural populations have been challenging, as comprehensive sampling is logistically  
61 difficult, and sequencing of entire populations costly. Here, we address these issues using a  
62 collaborative approach, sequencing 48 pooled population samples from 32 locations, and perform the  
63 first continent-wide genomic analysis of genetic variation in European *Drosophila melanogaster*. Our  
64 analyses uncover longitudinal population structure, provide evidence for continent-wide selective  
65 sweeps, identify candidate genes for local climate adaptation, and document clines in chromosomal  
66 inversion and transposable element frequencies. We also characterise variation among populations in  
67 the composition of the fly microbiome, and identify five new DNA viruses in our samples.

68

## 69 **Introduction**

70 Understanding processes that influence genetic variation in natural populations is fundamental to  
71 understanding the process of evolution (Dobzhansky 1970; Lewontin 1974; Kreitman 1983; Kimura  
72 1984; Hudson *et al.* 1987; McDonald & Kreitman 1991; Adrian & Comeron 2013). Until recently,  
73 technological constraints have limited studies of natural genetic variation to small regions of the  
74 genome and small numbers of individuals. With the development of population genomics, we can  
75 now analyse patterns of genetic variation for large numbers of individuals genome-wide, with samples  
76 structured across space and time. As a result, we have new insight into the evolutionary dynamics of  
77 genetic variation in natural populations (e.g., Hohenlohe *et al.* 2010; Cheng *et al.* 2012; Begun *et al.*  
78 2007; Pool *et al.* 2012; Harpur *et al.* 2014; Zanini *et al.* 2015). But, despite this technological  
79 progress, extensive large-scale sampling and genome sequencing of populations remains prohibitively  
80 expensive and too labor-intensive for most individual research groups.

81 Here, we present the first comprehensive, continent-wide genomic analysis of genetic variation of  
82 European *Drosophila melanogaster*, based on 48 pool-sequencing samples from 32 populations  
83 collected in 2014 (fig. 1) by the European *Drosophila* Population Genomics Consortium (*DrosEU*;

84 <https://droseu.net>). *D. melanogaster* offers several advantages for genomic studies of evolution in  
85 space and time. It boasts a relatively small genome, a broad geographic range, a multivoltine life  
86 history which allows sampling across generations on short timescales, simple standard techniques for  
87 collecting wild samples, and a well-developed context for population genomic analysis (e.g., Powell  
88 1997; Keller 2007; Hales *et al.* 2015). Importantly, this species is studied by an extensive  
89 international research community, with a long history of developing shared resources (Larracuente &  
90 Roberts 2015; Bilder & Irvine 2017; Haudry *et al.* 2020).

91 Our study complements and extends previous studies of genetic variation in *D. melanogaster*, both  
92 from its native range in sub-Saharan Africa and from its world-wide expansion as a human  
93 commensal. The expansion into Europe is thought to have occurred approximately 4,100 - 19,000  
94 years ago and into North America and Australia in the last few centuries (e.g., Lachaise *et al.* 1988;  
95 David & Capy 1988; Li & Stephan 2006; Keller 2007; Sprengelmeyer *et al.* 2018; Kapopoulou *et al.*  
96 2018a; Arguello *et al.* 2019). The colonization of novel habitats and climate zones on multiple  
97 continents makes *D. melanogaster* especially useful for studying parallel local adaptation, with  
98 previous studies finding pervasive latitudinal clines in allele frequencies (e.g., Schmidt & Paaby 2008;  
99 Turner *et al.* 2008; Kolaczowski *et al.* 2011; Fabian *et al.* 2012; Bergland *et al.* 2014; Machado *et al.*  
100 2016; Kapun *et al.* 2016a), structural variants such as chromosomal inversions (reviewed in Kapun &  
101 Flatt 2019), transposable elements (TEs) (Boussy *et al.* 1998; González *et al.* 2008; 2010), and  
102 complex phenotypes (de Jong & Bochdanovits 2003; Schmidt & Paaby 2008; Schmidt *et al.* 2008;  
103 Kapun *et al.* 2016b; Behrman *et al.* 2018), especially along the North American and Australian east  
104 coasts. In addition to parallel local adaptation, these latitudinal clines are, however, also affected by  
105 admixture with flies from Africa and Europe (Caracristi & Schlötterer 2003; Yukilevich & True  
106 2008a; b; Duchon *et al.* 2013; Kao *et al.* 2015; Bergland *et al.* 2016).

107 In contrast, the population genomics of *D. melanogaster* on the European continent remains  
108 largely unstudied (Božičević *et al.* 2016; Pool *et al.* 2016; Mateo *et al.* 2018). Because Eurasia was  
109 the first continent colonized by *D. melanogaster* as they migrated out of Africa, we sought to  
110 understand how this species has adapted to new habitats and climate zones in Europe, where it has

111 been established the longest (Lachaise *et al.* 1988; David & Capy 1988). We analyse our data at three  
112 levels: (1) variation at single-nucleotide polymorphisms (SNPs) in nuclear and mitochondrial  
113 (mtDNA) genomes ( $\sim 5.5 \times 10^6$  SNPs in total); (2) structural variation, including TE insertions and  
114 chromosomal inversion polymorphisms; and (3) variation in the microbiota associated with flies,  
115 including bacteria, fungi, protists, and viruses.

116

## 117 **Results and Discussion**

118 As part of the *DrosEU* consortium, we collected 48 population samples of *D. melanogaster* from 32  
119 geographical locations across Europe in 2014 (table 1; fig. 1). We performed pooled sequencing  
120 (Pool-Seq) of all 48 samples, with an average autosomal coverage  $\geq 50x$  (supplementary table S1,  
121 Supplementary Material online). Of the 32 locations, 10 were sampled at least once in summer and  
122 once in fall (fig. 1), allowing a preliminary analysis of seasonal change in allele frequencies on a  
123 genome-wide scale.

124 A description of the basic patterns of genetic variation of these European *D. melanogaster*  
125 population samples, based on SNPs, is provided in the supplement (see supplementary results,  
126 supplementary table S1, Supplementary Material online). For each sample, we estimated genome-  
127 wide levels of  $\pi$ , Watterson's  $\theta$  and Tajima's  $D$  (corrected for pooling; Futschik & Schlötterer 2010;  
128 Kofler *et al.* 2011). In brief, patterns of genetic variability and Tajima's  $D$  were largely consistent  
129 with what has been previously observed on other continents (e.g., Fabian *et al.* 2012; Langley *et al.*  
130 2012; Lack *et al.* 2015, 2016), and genetic diversity across the genome varies mainly with  
131 recombination rate (Langley *et al.* 2012). We also found little spatio-temporal variation among  
132 European populations in overall levels of sequence variability (table 2).

133 Below we focus on the identification of selective sweeps, previously unknown longitudinal  
134 population structure across the European continent, patterns of local adaptation and clines, and  
135 microbiota.

136

### 137 **Several genomic regions show signatures of continent-wide selective sweeps**

138 To identify genomic regions that have likely undergone selective sweeps in European populations of  
139 *D. melanogaster*, we used *Pool-hmm* (Boitard *et al.* 2013; see supplementary table S2A,  
140 Supplementary Material online), which identifies candidate sweep regions via distortions in the allele  
141 frequency spectrum. We ran *Pool-hmm* independently for each sample and identified several genomic  
142 regions that coincide with previously identified, well-supported sweeps in the proximity of *Hen1*  
143 (Kolaczowski *et al.* 2011), *Cyp6g1* (Daborn *et al.* 2002), *wapl* (Beisswanger *et al.* 2006), and around  
144 the chimeric gene *CR18217* (Rogers & Hartl 2012), among others (supplementary table S2B,  
145 Supplementary Material online). These regions also showed local reductions in Tajima's *D*, consistent  
146 with selection (fig. 2; fig. S1 and fig. S2; Supplementary Material online). The putative sweep regions  
147 that we identified in the European populations included 145 of the 232 genes previously identified  
148 using *Pool-hmm* in an Austrian population (Boitard *et al.* 2012; supplementary table S2C,  
149 Supplementary Material online). We also identified other regions which have not previously been  
150 described as targets of selective sweeps (supplementary table S2A, Supplementary Material online).  
151 Of the regions analysed, 64 showed signatures of selection across all European populations  
152 (supplementary table S2D, Supplementary Material online). Of these, 52 were located in the 10% of  
153 regions with the lowest values of Tajima's *D* (SuperExactTest;  $p < 0.001$ ). These may represent  
154 continent-wide sweeps that predate the colonization of Europe (e.g., Beisswanger *et al.* 2006) or  
155 which have recently swept across the majority of European populations (supplementary table S2D).

156 We then asked if there was any indication of selective sweeps particular to a certain habitat. To  
157 this end, we classified the populations according to the Köppen-Geiger climate classification (Peel *et*  
158 *al.* 2007) and identified several putative sweeps exclusive to arid, temperate and cold regions  
159 (supplementary table S2A, Supplementary Material online). To shed light on potential phenotypes  
160 affected by the potential sweeps we performed a gene ontology (GO) analysis. For temperate  
161 climates, this analysis showed enrichment for functions such as 'response to stimulus', 'transport',  
162 and 'nervous system development'. For cold climates, it showed enrichment for 'vitamin and co-  
163 factor metabolic processes' (supplementary table S2E, Supplementary Material online). There was no

164 enrichment of any GO category for sweeps associated with arid regions.

165 Thus, we identified several new candidate selective sweeps in European populations of *D.*

166 *melanogaster*, many of which occur in the majority of European populations and which merit future

167 study, using sequencing of individual flies and functional genetic experiments.

168

### 169 **European populations are structured along an east-west gradient**

170 We next investigated whether patterns of genetic differentiation might be due to demographic sub-

171 structuring. Overall, pairwise differentiation as measured by  $F_{ST}$  was relatively low, particularly for

172 the autosomes (autosomal  $F_{ST}$  0.013–0.059; *X*-chromosome  $F_{ST}$ : 0.043–0.076; Mann-Whitney U test;

173  $p < 0.001$ ; supplementary table S1, Supplementary Material online). The *X* chromosome is expected

174 to have higher  $F_{ST}$  than the autosomes, given its relatively smaller effective population size (Mann-

175 Whitney U test;  $p < 0.001$ ; Hutter *et al.* 2007). One population, from Sheffield (UK), was unusually

176 differentiated from the others (average pairwise  $F_{ST} = 0.027$ ; SE= 0.00043 vs.  $F_{ST} = 0.04$ ; SE=

177 0.00055 for comparisons without this population and with this population only; supplementary table

178 S1, Supplementary Material online). Including this sample in the analysis could potentially lead to

179 exaggerated patterns of geographic differentiation, as it is both highly differentiated and the furthest

180 west. We therefore excluded it from the following analyses of geographic differentiation, as this

181 approach is conservative. (For details see the Supplementary Material online; including or excluding

182 this population did not qualitatively change our results and their interpretation.)

183 Despite low overall levels of among-population differentiation, we found that European

184 populations exhibit clear evidence of geographic sub-structuring. For this analysis, we focused on

185 SNPs located within short introns, with a length  $\leq 60$ bp and which most likely reflect neutral

186 population structure (Haddrill *et al.* 2005; Singh *et al.* 2009; Parsch *et al.* 2010; Clemente & Vogl

187 2012; Lawrie *et al.* 2013). We further filtered out polymorphisms in regions of high recombination ( $r$

188  $> 3$ cM/Mb; Comeron *et al.* 2011) and restricted our analysis to SNPs at least 1 Mb away from the

189 breakpoints of common inversions, resulting in 4,034 SNPs used for demographic analysis.

190 We found two signatures of geographic differentiation using these putatively neutral SNPs. First,  
191 we identified a weak but significant correlation between pairwise  $F_{ST}$  and geographic distance,  
192 consistent with isolation by distance (IBD; Mantel test;  $p < 0.001$ ;  $R^2=0.12$ , max.  $F_{ST} \sim 0.045$ ; fig.  
193 3A). Second, a principal components analysis (PCA) on allele frequencies showed that the three most  
194 important PC axes explain >25% of the total variance (PC1: 16.71%, PC2: 5.83%, PC3: 4.6%,  
195 eigenvalues = 159.8, 55.7, and 44, respectively; fig 3B). The first axis, PC1, was strongly correlated  
196 with longitude ( $F_{1,42} = 118.08$ ,  $p < 0.001$ ; table 2). Again, this pattern is consistent with IBD, as the  
197 European continent extends further in longitude than latitude. We repeated the above PCA using  
198 SNPs in four-fold degenerate sites, as these are also assumed to be relatively unaffected by selection  
199 (Akashi 1995; Halligan & Keightley 2006; supplementary fig. S3, Supplementary Material online),  
200 and found highly consistent results.

201 Because there was a significant spatial autocorrelation between samples (as indicated by Moran's  
202 test on residuals from linear regressions with PC1;  $p < 0.001$ ; table 2), we repeated the analysis with  
203 an explicit spatial error model; the association between PC1 and longitude remained significant. To a  
204 lesser extent PC2 was likewise correlated with longitude ( $F_{1,42} = 7.15$ ,  $p < 0.05$ ), but also with altitude  
205 ( $F_{1,42} = 11.77$ ,  $p < 0.01$ ) and latitude ( $F_{1,42} = 4.69$ ,  $p < 0.05$ ; table 2). Similar to PC2, PC3 was strongly  
206 correlated with altitude ( $F_{1,42} = 19.91$ ,  $p < 0.001$ ; table 2). We also examined these data for signatures  
207 of genetic differentiation between samples collected at different times of the year. For the dataset as a  
208 whole, no major PC axes were correlated with season, indicating that there were no strong differences  
209 in allele frequencies shared between all our summer and fall samples ( $p > 0.05$  for all analyses; table  
210 2). For the 10 locations sampled in both summer and fall, we performed separate PC analyses for  
211 summer and fall. Summer and fall values of PC1 (adjusted  $R^2$ : 0.98;  $p < 0.001$ ), PC2 ( $R^2$ : 0.74;  $p <$   
212 0.001) and PC3 ( $R^2$ : 0.81;  $p < 0.001$ ) were strongly correlated across seasons. This indicates a high  
213 degree of seasonal stability in local genetic variation.

214 Next, we attempted to determine if populations could be statistically classified into clusters of  
215 similar populations. Using hierarchical model fitting based on the first four PC axes from the PCA  
216 mentioned above, we found two distinct clusters (fig. 3B) separated along PC1, supporting the notion



217 of strong longitudinal differentiation among European populations. Similarly, model-based spatial  
218 clustering also showed that populations were separated mainly by longitude (fig. 3C; using ConStruct,  
219 with K=3 spatial layers chosen based on model selection procedure via cross-validation). We also  
220 inferred levels of admixture among populations from this analysis, based on the relationship between  
221  $F_{ST}$  and migration rate (Wright *et al.* 1951) and using recent estimates of  $N_e$  in European populations  
222 ( $N_e \sim 3.1 \times 10^6$ ; Duchen *et al.* 2011; for pairwise migration rates see supplementary table S3,  
223 Supplementary Material online). Within the Western European cluster and between the clusters,  $4N_e m$   
224 was similar ( $4N_e m$ -WE = 43.76,  $4N_e m$ -between = 45.97); in Eastern Europe, estimates of  $4N_e m$   
225 indicate significantly higher levels of admixture, despite the larger geographic range covered by these  
226 samples ( $4N_e m = 74.17$ ; Mann Whitney U-Test;  $p < 0.001$ ). This result suggests that the longitudinal  
227 differentiation in Europe might be partly driven by high levels of genetic exchange in Eastern Europe,  
228 perhaps due to migration and recolonization after harsh winters in that region. However, these  
229 estimates of gene flow must be interpreted with caution, as unknown demographic events can  
230 confound estimates of migration rates from  $F_{ST}$  (Whitlock & MacCauley 1999).

231 In addition to restricted gene flow between geographic areas, local adaptation may explain  
232 population sub-structure, even at neutral sites, if nearby and closely related populations are  
233 responding to similar selective pressures. We investigated whether any of 19 climatic variables,  
234 obtained from the WorldClim database (Hijmans *et al.* 2005), were associated with the genetic  
235 structure in our samples. These climatic variables represent interpolated averages across 30 years of  
236 observation at the geographic coordinates corresponding to our sampling locations. Since many of  
237 these variables are highly intercorrelated, we analysed their joint effects on genetic variation, by using  
238 PCA to summarize the information they capture. The first three climatic PC axes capture more than  
239 77% of the variance in the 19 climatic variables (supplementary table S4, Supplementary Material  
240 online). PC1 explained 36% of the variance and was strongly correlated ( $r > 0.75$  or  $r < -0.75$ ) with  
241 climatic variables differentiating ‘hot and dry’ from ‘cold and wet’ climates (e.g., maximum  
242 temperature of the warmest month,  $r = 0.84$ ; mean temperature of warmest quarter,  $r = 0.86$ ; annual  
243 mean temperature,  $r = 0.85$ ; precipitation during the warmest quarter,  $r = -0.87$ ). Conversely, PC2

244 (27.3% of variance explained) distinguished climates with low and high differences between seasons  
245 (e.g., isothermality,  $r = 0.83$ ; temperature seasonality,  $r = 0.88$ ; temperature annual range,  $r = -0.78$ ;  
246 precipitation in coldest quarter,  $r = 0.79$ ). Both PC1 and PC2 were strongly correlated with latitude  
247 (linear regression with PC1:  $R^2 = 0.48$ ,  $p < 0.001$ ; PC2:  $R^2 = 0.58$ ,  $p < 0.001$ ) and PC2 was also  
248 weakly correlated with latitude ( $R^2 = 0.11$ ; linear regression,  $p < 0.05$ ) and altitude ( $R^2 = 0.12$ ; linear  
249 regression,  $p < 0.01$ ).

250 We next asked whether any of these climate PCs explained any of the genetic structure uncovered  
251 above. Pairwise linear regressions of the first three PC axes based on allele frequencies of intronic  
252 SNPs against the first three climatic PCs revealed that only one significant correlation after  
253 Bonferroni correction: between climatic PC2 ('seasonality') vs. genetic PC1 (longitude; adjusted  $\alpha =$   
254  $0.017$ ;  $R^2 = 0.49$ ,  $P < 0.001$ ). This suggests that longitudinal differentiation along the European  
255 continent might be partly driven by the transition from oceanic to continental climate, possibly  
256 leading to local adaptation to gradual changes in temperature seasonality and the severity of winter  
257 conditions.

258 Interestingly, the central European division into an eastern and a western clade of *D. melanogaster*  
259 closely resembles known hybrid zones of organisms which form closely related pairs of sister taxa.  
260 These biogeographic patterns have been associated with long-term reductions of gene flow between  
261 eastern and western population during the last glacial maximum, followed by postglacial  
262 recolonization of the continent from southern refugia (Hewitt 1999). However, in contrast to many of  
263 these taxa, which often exhibit pronounced pre- and postzygotic isolation (Szymura & Barton 1986;  
264 Haas & Brodin 2005; Macholán *et al.* 2008, Knief *et al.* 2019), we found low genome-wide  
265 differentiation among eastern and western populations (average max.  $F_{ST} \sim 0.045$ ), perhaps indicating  
266 that the longitudinal division of European *D. melanogaster* is not the result of postglacial secondary  
267 contact.

268

## 269 **Climatic predictors identify genomic signatures of local climate adaptation**

270 To further explore climatic patterns, and to identify signatures of local adaptation caused by climatic

271 differences among populations independent of neutral demographic effects, we tested for associations  
272 of SNP alleles with climatic PC1 and PC2 using BayeScEnv (de Villemereuil & Gaggiotti 2015). The  
273 total number of SNPs tested and the number of “top SNPs” ( $q$ -value  $< 0.05$ ) are given in  
274 supplementary table S5A (Supplementary Material online). A large proportion of the top SNPs were  
275 intergenic (PC1: 33.5%; PC2: 32.2%) or intronic variants (PC1: 50.1%; PC2: 50.5%). Manhattan  
276 plots of  $q$ -values for all SNPs are shown in fig. 4. These figures show some distinct “peaks” of highly  
277 differentiated SNPs along with some broader regions of moderately differentiated SNPs (fig. 4). For  
278 example, the circadian rhythm gene *timeout* and the ecdysone signalling genes *Eip74EF* and *Eip75B*  
279 all lie near peaks associated with climatic PC1 (‘hot/dry’ vs. ‘cold/wet’; fig. 4, top panels). We note  
280 that the corresponding genes have been identified in previous studies of clinal (latitudinal)  
281 differentiation in North American *D. melanogaster* (Fabian *et al.* 2012; Machado *et al.* 2016). In fact,  
282 we found a significant overlap between genes associated with PC1 and PC2 from our study and  
283 candidate gene sets from these previous studies of latitudinal clines (SuperExactTest;  $p < 0.001$ ;  
284 Fabian *et al.* 2012; Machado *et al.* 2016). Moreover, the BayeScEnv analysis and *Pool-hmm* analysis  
285 together identify four regions with both climatic associations and evidence for continent-wide  
286 selective sweeps (supplementary table S5B-C, Supplementary Material online). Finally, four other  
287 BayeScEnv candidate genes were previously identified as targets of selection in African and North  
288 American populations based on significant McDonald-Kreitman tests (Langley *et al.* 2012; see  
289 supplementary table S5B-C, Supplementary Material online).

290 We next asked whether any insights into the targets of local selection could be gleaned from  
291 examining the functions of genes near the BayeScEnv peaks. We examined annotated features within  
292 2kb of significantly associated SNPs (PC1: 3,545 SNPs near 2,078 annotated features; PC2: 5,572  
293 SNPs near 2,717 annotated features; supplementary table S5B and C, Supplementary Material online).  
294 First, we performed a GO term analysis with GOwinda (Kofler & Schlötterer 2012) to ask whether  
295 SNPs associated with climatic PCs are enriched for any gene functions. For PC1, we found no GO  
296 term enrichment. For PC2, we found enrichment for “cuticle development”, and “UDP-  
297 glucosyltransferase activity”. Next, we performed functional annotation clustering with DAVID

298 (v6.8; Huang *et al.* 2009), and identified 37 and 47 clusters with an enrichment score > 1.3 for PC1  
299 and PC2, respectively (supplementary table S5D-E, Supplementary Material online). PC1 was  
300 enriched for categories such as “sex differentiation” and “response to nicotine”, whereas PC2 was  
301 enriched for functional categories such as “response to nicotine”, “integral component of membrane”,  
302 and “sensory perception of chemical stimulus” (supplementary table S5D-E, Supplementary Material  
303 online).

304 We also asked whether the SNPs identified by BayeScEnv show consistent signatures of local  
305 adaptation. Many associated genes (1,205) were also shared between PC1 and PC2. Some genes have  
306 indeed been previously implicated in climatic and clinal adaptation, such as the circadian rhythm  
307 genes *timeless*, *timeout*, and *clock*, the sexual differentiation gene *fruitless*, and the *couch potato*  
308 locus which underlies the latitudinal cline in reproductive dormancy in North America (e.g., Tauber *et*  
309 *al.* 2007; Schmidt *et al.* 2008; Fabian *et al.* 2012). Notably, these also include the major insulin  
310 signaling genes *insulin-like receptor (InR)* and *forkhead box subgroup O (foxo)*, which have strong  
311 genomic and experimental evidence implicating these loci in clinal, climatic adaptation along the  
312 North America east coast (Paaby *et al.* 2010; Fabian *et al.* 2012; Paaby *et al.* 2014; Durmaz *et al.*  
313 2019). Thus, European populations share multiple potential candidate targets of selection with North  
314 American populations (cf. Fabian *et al.* 2012; Machado *et al.* 2016; also see Božičević *et al.* 2016).  
315 We next turned to examining polymorphisms other than SNPs, i.e. mitochondrial haplotypes as well  
316 as inversion and TE polymorphisms.

317

### 318 **Mitochondrial haplotypes also exhibit longitudinal population structure**

319 Mitochondrial haplotypes also showed evidence of longitudinal demographic structure in European  
320 population. We identified two main alternative mitochondrial haplotypes in Europe, G1 and G2, each  
321 with several sub-haplotypes (G1.1 and G1.2 and G2.1, G2.2 and G2.3). The two sub-types, G1.2 and  
322 G2.1, are separated by 41 mutations (fig. 5A). The frequencies of the alternative G1 and G2 haplotype  
323 varied among populations between 35.1% and 95.6% and between 4.4% and 64.9%, respectively (fig.  
324 5B). Qualitatively, three types of European populations could be distinguished based on these

325 haplotypes: (1) central European populations, with a high frequency (> 60%) of G1 haplotypes, (2)  
326 Eastern European populations in summer, with a low frequency (< 40%) of G1 haplotypes, and (3)  
327 Iberian and Eastern European populations in fall, with a frequency of G1 haplotypes between 40-60%  
328 (supplementary fig. S4, Supplementary Material online). Analyses of mitochondrial haplotypes from a  
329 North American population (Cooper *et al.* 2015) as well as from worldwide samples (Wolff *et al.*  
330 2016) also revealed high levels of haplotype diversity.

331 While there was no correlation between the frequency of G1 haplotypes and latitude, G1  
332 haplotypes and longitude were weakly but significantly correlated ( $r^2 = 0.10$ ;  $p < 0.05$ ). We thus  
333 divided the dataset into an eastern and a western sub-set along the 20° meridian, corresponding to the  
334 division of two major climatic zones, temperate (oceanic) versus cold (continental) (Peel *et al.* 2007).  
335 This split revealed a clear correlation ( $r^2=0.5$ ;  $p<0.001$ ) between longitude and the frequency of G1  
336 haplotypes, explaining as much as 50% of the variation in the western group (supplementary fig. S4B,  
337 Supplementary Material online). Similarly, in eastern populations, longitude and the frequency of G1  
338 haplotypes were correlated ( $r^2 = 0.2$ ;  $p<0.001$ ), explaining approximately 20% of the variance  
339 (supplementary fig. S4B, Supplementary Material online). Thus, these mitochondrial haplotypes  
340 appear to follow a similar east-west population structure as observed for the nuclear SNPs described  
341 above .

342

### 343 **The frequency of polymorphic TEs varies with longitude and altitude**

344 To examine the population genomics of structural variants, we first focused on transposable elements  
345 (TEs). Similar to previous findings, the repetitive content of the 48 samples ranged from 16% to 21%  
346 of the nuclear genome size (Quesneville *et al.* 2005; fig. 6). The vast majority of detected repeats  
347 were TEs, mostly long terminal repeat elements (LTRs; range 7.55 % - 10.15 %) and long  
348 interspersed nuclear elements (LINEs range 4.18 % - 5.52 %), along with a few DNA elements (range  
349 1.16 % - 1.65 %) (supplementary table S6, Supplementary Material online). LTRs have been  
350 previously described as being the most abundant TEs in the *D. melanogaster* genome (Kaminker *et al.*  
351 2002; Bergman *et al.* 2006). Correspondingly, variation in the proportion of LTRs best explained

352 variation in total TE content (LINE+LTR+DNA) (Pearson's  $r = 0.87$ ,  $p < 0.01$ , vs. DNA  $r = 0.58$ ,  $p =$   
353  $0.0117$ , and LINE  $r = 0.36$ ,  $p < 0.01$  and supplementary fig. S5A, Supplementary Material online).

354 For each of the 1,630 TE insertion sites annotated in the *D. melanogaster* reference genome v.6.04,  
355 we estimated the frequency at which a copy of the TE was present at that site using *T-lex2* (Fiston-  
356 Lavier *et al.* 2015; see supplementary table S7, Supplementary Material online). On average, 56%  
357 were fixed in all samples. The remaining polymorphic TEs mostly segregated at low frequency in all  
358 samples (supplementary fig. S5B), potentially due to purifying selection (González *et al.* 2008; Petrov  
359 *et al.* 2011; Kofler *et al.* 2012; Cridland *et al.* 2013; Blumenstiel *et al.* 2014). However, 246 were  
360 present at intermediate frequencies ( $>10\%$  and  $<95\%$ ) and located in regions of non-zero  
361 recombination (Fiston-Lavier *et al.* 2010; Comeron *et al.* 2012; see supplementary table S7,  
362 Supplementary Material online). Although some of these insertions might be segregating neutrally at  
363 transposition-selection balance (Charlesworth *et al.* 1994; see supplementary fig. S5B, Supplementary  
364 Material online), they are likely enriched for candidate adaptive mutations (Rech *et al.* 2019).

365 In each of the 48 samples, TE frequency and recombination rate were negatively correlated  
366 genome-wide (Spearman rank sum test;  $p < 0.01$ ), as has also been previously reported for *D.*  
367 *melanogaster* (Bartolomé *et al.* 2002; Petrov *et al.* 2011; Kofler *et al.* 2012). This remains true when  
368 fixed TE insertions were excluded (population frequency  $\geq 95\%$ ) from the analysis, although it was  
369 not statistically significant for some chromosomes and populations (supplementary table S8,  
370 Supplementary Material online). In both cases, the correlation was stronger when broad-scale (Fiston-  
371 Lavier *et al.* 2010) rather than fine-scale (Comeron *et al.* 2012) recombination rate estimates were  
372 used, indicating that the former may best capture long-term population recombination patterns (see  
373 supplementary materials and methods and supplementary table S8, Supplementary Material online).

374 We next tested whether variation in TE frequencies among samples was associated with spatially  
375 or temporally varying factors. We focused on 111 TE insertions that segregated at intermediate  
376 frequencies, were located in non-zero recombination regions, and that showed an interquartile range  
377 (IQR)  $> 10$  (see supplementary materials and methods, Supplementary Material online). Of these  
378 insertions, 57 were significantly associated with a at least one variable of interest after multiple testing

379 correction (supplementary table S9A, Supplementary Material online): 13 were significantly  
380 associated with longitude, 13 with altitude, five with latitude, three with season, and 23 insertions  
381 with more than one of these variables (supplementary table S9A, Supplementary Material online).  
382 These 57 TEs were mainly located inside genes (42 out of 57; Fisher's Exact Test,  $p > 0.05$ ;  
383 supplementary table S9A, Supplementary Material online).

384 The 57 TEs significantly associated with these environmental variables were enriched for two TE  
385 families: the LTR 297 family with 11 copies, and the DNA *pogo* family with five copies ( $\chi^2$ -values  
386 after Yate's correction  $< 0.05$ ; supplementary table S9B, Supplementary Material online).  
387 Interestingly, 17 of the 57 TEs coincided with previously identified adaptive candidate TEs,  
388 suggesting that our dataset might be enriched for adaptive insertions (SuperExactTest,  $p < 0.001$ ),  
389 several of which exhibit spatial frequency clines that deviate from neutral expectation  
390 (SuperExactTest,  $p < 0.001$ , supplementary table S9A, Supplementary Material online; cf.; Rech *et al.*  
391 2019). Moreover, 18 of the 57 TEs also show significant correlations with either geographical or  
392 temporal variables in North American populations (SuperExactTest,  $p < 0.001$ , supplementary table  
393 S9A, Supplementary Material online; cf.; Lerat *et al.* 2019).

394

### 395 **Inversions exhibit latitudinal and longitudinal clines in Europe**

396 Polymorphic chromosomal inversions, another class of structural variants besides TEs, are well-  
397 known to exhibit pronounced spatial (clinal) patterns in North American, Australian and other  
398 populations, possibly due to spatially varying selection (reviewed in Kapun & Flatt 2019; also see  
399 Mettler *et al.* 1977; Knibb *et al.* 1981; Leumeunier & Aulard 1992; Hoffmann & Weeks 2007; Fabian  
400 *et al.* 2012; Kapun *et al.* 2014; Rane *et al.* 2015; Adrion *et al.* 2015; Kapun *et al.* 2016a). However, in  
401 contrast to North America and Australia, inversion clines in Europe remain poorly characterized  
402 (Lemeunier & Aulard 1992; Kapun & Flatt 2019). We therefore sought to examine the presence and  
403 frequency of six cosmopolitan inversions (*In(2L)t*, *In(2R)NS*, *In(3L)P*, *In(3R)C*, *In(3R)Mo*,  
404 *In(3R)Payne*) in our European samples, using a panel of inversion-specific marker SNPs (Kapun *et al.*  
405 2014). All 48 samples were polymorphic for one or more inversions (Figure 6). However, only

406 *In(2L)t* segregated at substantial frequencies in most populations (average frequency = 20.2%); all  
407 other inversions were either absent or rare (average frequencies: *In(2R)NS* = 6.2%, *In(3L)P* = 4%,  
408 *In(3R)C* = 3.1%, *In(3R)Mo* = 2.2%, *In(3R)Payne* = 5.7%) (cf. Kapun *et al.* 2016; Kapun & Flatt  
409 2019).

410 Despite their overall low frequencies, several inversions showed pronounced clinality. For all of  
411 the analyses below, we tested for confounding effects of spatial autocorrelation, by asking if there was  
412 significant residual spatio-temporal autocorrelation among samples; all of these test were negative,  
413 except for *In(3R)C* (Moran's  $I \approx 0$ ,  $p > 0.05$  for all tests; table 3). We observed significant latitudinal  
414 clines for *In(3L)P*, *In(3R)C* and *In(3R)Payne* (generalized linear regression, Inversion frequency  $\sim$   
415 Continent \* Latitude;  $p < 0.001$  for all; see table 3). Clines for *In(3L)P* and *In(3R)Payne* were  
416 qualitatively similar for both continents (with frequencies decreasing with latitude,  $p < 0.05$  for both),  
417 although all inversions differed in their frequency at the same latitude between North America and  
418 Europe ( $p < 0.001$  for Continent; supplementary table S10, Supplementary Material online).

419 Latitudinal inversion clines previously observed along the North American and Australian east  
420 coasts (supplementary fig. S6 and supplementary table S10, Supplementary Material online; Kapun *et al.*  
421 *et al.* 2016a) have been attributed to spatially varying selection, especially in the case of *In(3R)Payne*  
422 (Durmaz *et al.* 2018; Anderson *et al.* 2005; Umina *et al.* 2005; Kennington *et al.* 2006; Rako *et al.*  
423 2006; Kapun *et al.* 2016a,b; Kapun & Flatt 2019). Similar to patterns in North America (Kapun *et al.*  
424 2016a), we observed that clinality of the three inversion polymorphisms was markedly stronger than  
425 for putatively neutral SNPs in short introns (see supplementary table S11, Supplementary Material  
426 online), suggesting that these polymorphisms may be non-neutral. Together, these finding suggest that  
427 latitudinal inversion clines in Europe are shaped by spatially varying selection.

428 We also detected longitudinal clines for *In(2L)t* and *In(2R)NS*, with both polymorphisms  
429 decreasing in frequency from east to west (Inversion frequency  $\sim$  Latitude + Longitude + Altitude +  
430 Season;  $p < 0.01$ ; table 3; also cf. Kapun & Flatt 2019). Longitudinal clines for these two inversions  
431 have also been found in North America (Kapun & Flatt 2019). One of these inversions, *In(2L)t*, also  
432 changed in frequency with altitude (table 3). The longitudinal and altitudinal inversion clines did,



433 however, not deviate from neutral expectation (supplementary table S11, Supplementary Material  
434 online).

435

436 **European *Drosophila* microbiomes contain Entomophthora, trypanosomatids and previously**  
437 **unknown DNA viruses**

438 The microbiota can affect life history traits, immunity, hormonal physiology, and metabolic  
439 homeostasis of their fly hosts (e.g., Trinder *et al.* 2017; Martino *et al.* 2017) and might thus reveal  
440 interesting patterns of local adaptation. We therefore examined the bacterial, fungal, protist, and viral  
441 microbiota sequence content of our samples. To do this, we characterised the taxonomic origin of the  
442 non-*Drosophila* reads in our dataset using MGRAST, which identifies and counts short protein motifs  
443 ('features') within reads (Meyer *et al.* 2008). We examined 262 million reads in total. Of these, most  
444 were assigned to *Wolbachia* (mean 53.7%; fig. 7; supplementary table S1), a well-known  
445 endosymbiont of *Drosophila* (Werren *et al.* 2008). The abundance of *Wolbachia* protein features  
446 relative to other microbial protein features (relative abundance) varied strongly between samples,  
447 ranging from 8.8% in a sample from Ukraine to almost 100% in samples from Spain, Portugal,  
448 Turkey and Russia (supplementary table S12, Supplementary Material online). Similarly, *Wolbachia*  
449 loads varied 100-fold between samples, as estimated from the ratio of *Wolbachia* protein features to  
450 *Drosophila* protein features (supplementary table S12, Supplementary Material online). In contrast to  
451 a previous study (Kriesner *et al.* 2016), there was no evidence for clinality of *Wolbachia* loads ( $p =$   
452 0.13, longitude;  $p = 0.41$ , latitude; Kendall's rank correlation). However, these authors measured  
453 infection frequencies while we measured *Wolbachia* loads in pooled samples. Because the frequency  
454 of infection does not necessarily correlate with microbial loads measured in pooled samples, we might  
455 not have been able to detect such a signal in our data.

456 Acetic acid bacteria of the genera *Gluconobacter*, *Gluconacetobacter*, and *Acetobacter* were the  
457 second largest group, with an average relative abundance of 34.4% among microbial protein features.  
458 Furthermore, we found evidence for the presence of several genera of Enterobacteria (*Serratia*,  
459 *Yersinia*, *Klebsiella*, *Pantoea*, *Escherichia*, *Enterobacter*, *Salmonella*, and *Pectobacterium*). *Serratia*

460 occurs only at low frequencies or is absent from most of our samples, but reaches a very high relative  
461 abundance among microbial protein features in the Nicosia (Cyprus) summer collection (54.5%). This  
462 high relative abundance was accompanied by an 80x increase in *Serratia* bacterial load.

463 We also detected several eukaryotic microorganisms, although they were less abundant than the  
464 bacteria. We found trypanosomatids, previously reported to be associated with *Drosophila* in other  
465 studies (Wilfert *et al.* 2011; Chandler & James 2013; Hamilton *et al.* 2015), in 16 of our samples, on  
466 average representing 15% of all microbial protein features identified in these samples.

467 Fungal protein features make up <3% of all but three samples (from Finland, Austria and Turkey;  
468 supplementary table S12, Supplementary Material online). This is somewhat surprising because  
469 yeasts are commonly found on rotting fruit, the main food substrate of *D. melanogaster*, and co-occur  
470 with flies (Barata *et al.* 2012; Chandler *et al.* 2012). This result suggests that, although yeasts can  
471 attract flies and play a role in food choice (Becher *et al.* 2012; Buser *et al.* 2014), they might not be  
472 highly prevalent in or on *D. melanogaster* bodies. One reason might be that they are actively digested  
473 and thus not part of the microbiome. We also found the fungal pathogen *Entomophthora muscae* in 14  
474 samples, making up 0.18% of the reads (Elya *et al.* 2018).

475 Our data also allowed us to identify DNA viruses. Only one DNA virus has been previously  
476 described for *D. melanogaster* (*Kallithea* virus; Webster *et al.* 2015; Palmer *et al.* 2018) and only two  
477 additional ones from other Drosophilid species (*Drosophila innubila* Nudivirus [Unckless 2011],  
478 Invertebrate Iridovirus 31 in *D. obscura* and *D. immigrans* [Webster *et al.* 2016]). In our data set,  
479 approximately two million reads came from *Kallithea* nudivirus (Webster *et al.* 2015), allowing us to  
480 assemble the first complete *Kallithea* genome (>300-fold coverage in the Ukrainian sample  
481 UA\_Kha\_14\_46; Genbank accession KX130344).

482 We also found reads from five additional DNA viruses that were previously unknown  
483 (supplementary table S13, Supplementary Material online). First, around 1,000 reads come from a  
484 novel nudivirus closely related to both *Kallithea* virus and to *Drosophila innubila* nudivirus (Unckless  
485 2011) in sample DK\_Kar\_14\_41 from Karensminde, Denmark supplementary table S13,  
486 Supplementary Material online). As the reads from this virus were insufficient to assemble the

487 genome, we identified a publicly available dataset (SRR3939042: 27 male *D. melanogaster* from  
488 Esparto, California; Machado *et al.* 2016) with sufficient reads to complete the genome (provisionally  
489 named “*Esparto Virus*”; KY608910). Second, we also identified two novel Densoviruses  
490 (*Parvoviridae*). The first is a relative of *Culex pipiens* densovirus, provisionally named “*Viltain*  
491 virus”, found at 94-fold coverage in sample FR\_Vil\_14\_07 (Viltain; KX648535). The second is  
492 “*Linvill Road virus*”, a relative of *Dendrolimus punctatus* densovirus, represented by only 300 reads  
493 here, but with high coverage in dataset SRR2396966 from a North American sample of *D. simulans*,  
494 permitting assembly (KX648536; Machado *et al.* 2016). Third, we detected a novel member of the  
495 *Bidnaviridae* family, “*Vesanto virus*”, a bidensovirus related to *Bombyx mori* densovirus 3 with  
496 approximately 900-fold coverage in sample FI\_Ves\_14\_38 (Vesanto; KX648533 and KX648534).  
497 Finally, in one sample (UA\_Yal\_14\_16), we detected a substantial number of reads from an  
498 Entomopox-like virus, which we were unable to fully assemble (supplementary table S13,  
499 Supplementary Material online).

500 Using a detection threshold of >0.1% of the *Drosophila* genome copy number, the most commonly  
501 detected viruses were *Kallithea virus* (30/48 of the pools) and *Vesanto virus* (25/48), followed by  
502 *Linvill Road virus* (7/48) and *Viltain virus* (5/48), with *Esparto virus* and the entomopox-like virus  
503 being the rarest (2/48 and 1/48, respectively). Because *Wolbachia* can protect *Drosophila* from  
504 viruses (Teixeira *et al.*, 2008), we hypothesized that *Wolbachia* loads might correlate negatively with  
505 viral loads, but found no evidence of such a correlation ( $p = 0.83$  *Kallithea virus*;  $p = 0.76$  *Esparto*  
506 *virus*;  $p = 0.52$  *Viltain virus*;  $p = 0.96$  *Vesanto 1 virus*;  $p = 0.93$  *Vesanto 2 virus*;  $p = 0.5$  *Linvill Road*  
507 *virus*; Kendall's rank correlation). Perhaps this is because the *Kallithea virus*, the most prevalent  
508 virus in our data set, is not expected to be affected by *Wolbachia* (Palmer *et al.*, 2018). Similarly, Shi  
509 *et al.* (2018) found no link between *Wolbachia* and the prevalence or abundance of RNA viruses in  
510 data from individual flies.

511 The variation in bacterial microbiomes across space and time reported here is analysed in more  
512 detail in Wang *et al.* (2020); this study suggests that some of this variation is structured  
513 geographically (cf. Walters *et al.* 2020). Thus, microbiome composition may contribute to phenotypic

514 differences and local adaptation among populations, (Haselkorn *et al.* 2009; Richardson *et al.* 2012;  
515 Staubach *et al.* 2013; Kriesner *et al.* 2016; Wang and Staubach 2018).

516

## 517 **Conclusions**

518 Here, we have comprehensively sampled and sequenced European populations of *D. melanogaster* for  
519 the first time (fig. 1). We find that European *D. melanogaster* populations are longitudinally  
520 differentiated for putatively neutral SNPs, mitochondrial haplotypes as well as for inversion and TE  
521 insertion polymorphisms. Potentially adaptive polymorphisms also show this pattern, possibly driven  
522 by the transition from oceanic to continental climate along the longitudinal axis of Europe. We note  
523 that this longitudinal differentiation qualitatively resembles the one observed for human populations  
524 in Europe (e.g., Cavalli-Sforza 1966; Xiao *et al.* 2004; Francalacci & Sanna 2008; Novembre *et al.*  
525 2008). Given that *D. melanogaster* is a human commensal (Keller 2007, Arguello *et al.* 2019), it is  
526 thus tempting to speculate that the demographic history of European populations might have been  
527 influenced by past human migration. Outside Europe, east-west structure has been previously found in  
528 sub-Saharan Africa populations of *D. melanogaster*, with the split between eastern and western  
529 African populations having occurred ~70 kya (Michalakis & Veuille 1996; Aulard *et al.* 2002;  
530 Kapopoulou *et al.* 2018b), a period that coincides with a wave of human migration from eastern into  
531 western Africa (Nielsen *et al.* 2017). However, in contrast to the pronounced pattern observed in  
532 Europe, African east-west structure is relatively weak, explaining only ~2.7% of variation, and is  
533 primarily due to an inversion whose frequency varies longitudinally. In contrast, our demographic  
534 analyses are based on SNPs located in >1 Mb distance from the breakpoints of the most common  
535 inversions, making it unlikely that the longitudinal pattern we observe is driven by inversions.

536 Our extensive sampling was feasible only due to synergistic collaboration among many research  
537 groups. Our efforts in Europe are paralleled in North America by the *Dros-RTEC* consortium  
538 (Machado *et al.* 2019), with whom we are collaborating to compare population genomic data across  
539 continents. Together, we have sampled both continents annually since 2014; we aim to continue to  
540 sample and sequence European and North American *Drosophila* populations with increasing spatio-

541 temporal resolution in future years. With these efforts, we hope to provide a rich community resource  
542 for biologists interested in molecular population genetics and adaptation genomics.

543

#### 544 **Materials and methods**

545 A detailed description of the materials and methods is provided in the supplementary materials and  
546 methods (see Supplementary Material online); here we give a brief overview of the dataset and the  
547 basic methods used. The 2014 *DrosEU* dataset represents the most comprehensive spatio-temporal  
548 sampling of European *D. melanogaster* populations to date (fig. 1; supplementary table S1,  
549 Supplementary Material online). It comprises 48 samples of *D. melanogaster* collected from 32  
550 geographical locations across Europe at different time points in 2014 through a joint effort of 18  
551 research groups. Collections were mostly performed with baited traps using a standardized protocol  
552 (see supplementary materials and methods, Supplementary Material online). From each collection, we  
553 pooled 33–40 wild-caught males. We used males as they are more easily distinguishable  
554 morphologically from similar species than females. Despite our precautions, we identified a low level  
555 of *D. simulans* contamination in our sequences; we computationally filtered these sequences from the  
556 data prior to further analysis (see Supplementary Material online). To sequence these samples, we  
557 extracted DNA and barcoded each sample, and sequenced the ~40 flies per sample as a pool (Pool-  
558 Seq; Schlötterer *et al.* 2014), as paired-end fragments on a *Illumina NextSeq 500* sequencer at the  
559 Genomics Core Facility of Pompeu Fabra University. Samples were multiplexed in 5 batches of 10  
560 samples, except for one batch of 8 samples (supplementary table S1, Supplementary Material online).  
561 Each multiplexed batch was sequenced on 4 lanes at ~50x raw coverage per sample. The read length  
562 was 151 bp, with a median insert size of 348 bp (range 209–454 bp). Our genomic dataset is available  
563 under NCBI Bioproject accession PRJNA388788. Sequences were processed and mapped to the *D.*  
564 *melanogaster* reference genome (v.6.12) and reference sequences from common commensals and  
565 pathogens. Our bioinformatic pipeline is available at [https://github.com/capoony/DrosEU\\_pipeline](https://github.com/capoony/DrosEU_pipeline).  
566 To call SNPs, we developed custom software (*PoolSNP*; see supplementary material and methods;  
567 <https://github.com/capoony/PoolSNP>), using stringent heuristic parameters. In addition, we obtained

568 genome sequences from African flies from the *Drosophila* Genome Nexus (DGN;  
569 <http://www.johnpool.net/genomes.html>; see supplementary table S14 for SRA accession numbers).  
570 We used data from 14 individuals from Rwanda and 40 from Siavonga (Zambia). We mapped these  
571 data to the *D. melanogaster* reference genome using the same pipeline as for our own data above, and  
572 built consensus sequences for each haploid sample by only considering alleles with  $> 0.9$  allele  
573 frequencies. We converted consensus sequences to *VCF* and used *VCFtools* (Danecek et al. 2011) for  
574 downstream analyses. Additional steps in the mapping and variant calling pipeline and further  
575 downstream analyses of the data are detailed in in the supplementary materials and methods  
576 (Supplementary Materials online).

577

### 578 **Supplementary Materials**

579 Supplementary materials and methods, supplementary results and supplementary figs. S1–S13 and  
580 supplementary tables S1–S18 are available at Molecular Biology and Evolution online  
581 (<http://www.mbe.oxfordjournals.org/>).

582

### 583 **Acknowledgments**

584 We thank two anonymous reviewers and the editors for their helpful comments on a previous version  
585 of our manuscript. We are grateful to the members of the *DrosEU* and Dros-RTEC consortia and to  
586 Dmitri Petrov (Stanford University) for support and discussion. *DrosEU* is funded by a Special Topic  
587 Networks (STN) grant from the European Society for Evolutionary Biology (ESEB). Computational  
588 analyses were partially executed at the Vital-IT bioinformatics facility of the University of Lausanne  
589 (Switzerland), the computing facilities of the CC LBBE/PRABI in Lyon (France), the bwUniCluster  
590 of the state of Baden-Württemberg (bwHPC), and the University of St Andrews Bioinformatics Unit  
591 which is funded by a Wellcome Trust ISSF award (grant 105621/Z/14/Z). We are grateful to Oscar  
592 Gaggiotti for advice on BayeScEnv analyses.

### 593 **Funding**

| <b>Funder</b>                                                                                  | <b>Grant reference number</b>    | <b>Author</b>                   |
|------------------------------------------------------------------------------------------------|----------------------------------|---------------------------------|
| University of Freiburg Research Innovation Fund 2014.<br>Deutsche Forschungsgemeinschaft (DFG) | STA1154/4-1Project<br>408908608  | Fabian Staubach                 |
| Academy of Finland                                                                             | #268241                          | Maaria Kankare                  |
| Academy of Finland                                                                             | #272927                          | Maaria Kankare                  |
| Russian Foundation of Basic Research                                                           | #15-54-46009 CT_a                | Elena G. Pasyukova              |
| Danish Natural Science Research Council                                                        | 4002-00113                       | Volker Loeschcke                |
| Ministerio de Economía y Competitividad                                                        | CTM2017-88080<br>(AEI/FEDER, UE) | Marta Pascual                   |
| CNRS                                                                                           | UMR 9191                         | Catherine<br>Montchamp-Moreau   |
| Vetenskapsrådet                                                                                | 2011-05679                       | Jessica Abbott                  |
| Vetenskapsrådet                                                                                | 2015-04680                       | Jessica Abbott                  |
| Emmy Noether Programme of the Deutsche<br>Forschungsgemeinschaft,(DFG)                         | PO 1648/3-1                      | Nico Posnien                    |
| National Institute of Health (NIH)                                                             | R35GM119686                      | Alan O. Bergland                |
| Ministerio de Economía y Competitividad                                                        | CGL2013-42432-P                  | Maria Pilar Garcia<br>Guerreiro |
| Scientific and Technological Research Council of<br>Turkey (TUBITAK)                           | #214Z238                         | Banu Sebnem Onder               |
| ANR Exhyb                                                                                      | 14-CE19-0016                     | Cristina Vieira                 |
| Network of Excellence LifeSpan                                                                 | FP6 036894                       | Bas J. Zwaan                    |
| IDEAL                                                                                          | FP7/2007-2011/259679             | Bas J. Zwaan                    |
| Israel Science Foundation                                                                      | 1737/17                          | Eran Tauber                     |
| National Institute of Health (NIH)                                                             | R01GM100366                      | Paul S. Schmidt                 |
| Deutsche Forschungsgemeinschaft (DFG)                                                          | PA 903/8-1                       | John Parsch                     |
| Austrian Science Fund (FWF)                                                                    | P32275                           | Martin Kapun                    |
| Austrian Science Fund (FWF)                                                                    | P27048                           | Andrea J. Betancourt            |
| Biotechnology and Biological Sciences Research<br>Council (BBSRC)                              | BB/P00685X/1                     | Andrea J. Betancourt            |
| Swiss National Science Foundation (SNSF)                                                       | PP00P3_133641                    | Thomas Flatt                    |
| Swiss National Science Foundation (SNSF)                                                       | PP00P3_165836                    | Thomas Flatt                    |
| Swiss National Science Foundation (SNSF)                                                       | 31003A_182262                    | Thomas Flatt                    |
| European Commission                                                                            | H2020-ERC-2014CoG-<br>647900     | Josefa González                 |

---

Secretaria d'Universitats i Recerca. Dept Economia i Coneixement. Generalitat de Catalunya

GRC 2017 SGR 880

Josefa González

---

Ministerio de Economía y Competitividad

FEDER BFU2014-57779-P

Josefa González

---

594

595

596 **References**

597 Adrian AB, Comeron JM (2013) The *Drosophila* early ovarian transcriptome provides insight to the  
598 molecular causes of recombination rate variation across genomes. *BMC Genomics*, **14**, 1-12.

599 Adrion JR, Hahn MW, Cooper BS (2015) Revisiting classic clines in *Drosophila melanogaster* in the  
600 age of genomics. *Trends in Genetics*, **31**, 434–444.

601 Akashi H (1995) Inferring weak selection from patterns of polymorphism and divergence at "silent"  
602 sites in *Drosophila* DNA. *Genetics*, **139**, 1067-1076.

603 Anderson AR, Hoffmann AA, McKechnie SW, Umina PA, Weeks AR (2005) The latitudinal cline in  
604 the *In(3R)Payne* inversion polymorphism has shifted in the last 20 years in Australian  
605 *Drosophila melanogaster* populations. *Molecular Ecology*, **14**, 851–858.

606 Arguello JR, Laurent S, Clark AG. (2019) Demographic History of the Human Commensal  
607 *Drosophila melanogaster*. *Genome Biology and Evolution* **11**:844–854.

608 Aulard S, David JR, Lemeunier F (2002) Chromosomal inversion polymorphism in Afrotropical  
609 populations of *Drosophila melanogaster*. *Genetic Research*, **79**, 49–63.

610 Barata A, Santos SC, Malfeito-Ferreira M, Loureiro V (2012) New insights into the ecological  
611 interaction between grape berry microorganisms and *Drosophila* flies during the development of  
612 sour rot. *Microbial Ecology*, **64**, 416–430.

613 Bartolomé C, Maside X, Charlesworth B (2002) On the Abundance and Distribution of Transposable  
614 Elements in the Genome of *Drosophila melanogaster*. *Molecular Biology and Evolution*, **19**,  
615 926–937.

616 Becher PG, Flick G, Rozpędowska E *et al.* (2012) Yeast, not fruit volatiles mediate *Drosophila*  
617 *melanogaster* attraction, oviposition and development. *Functional Ecology*, **26**, 822–828.

618 Begun DJ, Holloway AK, Stevens K *et al.* (2007) Population Genomics: Whole-Genome Analysis of  
619 Polymorphism and Divergence in *Drosophila simulans*. *PLoS Biology*, **5**, e310.



- 620 Behrman EL, Howick VM, Kapun M *et al.* (2018) Rapid seasonal evolution in innate immunity of  
621 wild *Drosophila melanogaster*. *Proceedings of the Royal Society of London B*, **285**, 20172599.
- 622 Beisswanger S, Stephan W, De Lorenzo D (2006) Evidence for a Selective Sweep in the *wapl* Region  
623 of *Drosophila melanogaster*. *Genetics*, **172**, 265–274.
- 624 Bergland AO, Behrman EL, O'Brien KR, Schmidt PS, Petrov DA (2014) Genomic Evidence of Rapid  
625 and Stable Adaptive Oscillations over Seasonal Time Scales in *Drosophila*. *PLoS Genetics*, **10**,  
626 e1004775.
- 627 Bergland AO, Tobler R, González J, Schmidt P, Petrov D (2016) Secondary contact and local  
628 adaptation contribute to genome-wide patterns of clinal variation in *Drosophila melanogaster*.  
629 *Molecular Ecology*, **25**, 1157–1174.
- 630 Bergman, C. M., Quesneville, H., Anxolabehere, D. & Ashburner, M. (2006) Recurrent insertion and  
631 duplication generate networks of transposable element sequences in the *Drosophila melanogaster*  
632 genome. *Genome Biology*, **7**, R112.
- 633 Blumenstiel JP, Chen X, He M, Bergman CM (2014) An Age-of-Allele Test of Neutrality for  
634 Transposable Element Insertions. *Genetics*, **196**, 523–538.
- 635 Boitard S, Schlötterer C, Nolte V, Pandey RV, Futschik A (2012) Detecting Selective Sweeps from  
636 Pooled Next-Generation Sequencing Samples. *Molecular Biology and Evolution*, **29**, 2177–2186.
- 637 Boitard S, Kofler R, Françoise P, Robelin D, Schlötterer C, Futschik A (2013) Pool-hmm: a Python  
638 program for estimating the allele frequency spectrum and detecting selective sweeps from next  
639 generation sequencing of pooled samples. *Mol Ecol Resour*, **13**, 337–340.
- 640 Boussy IA, Itoh M, Rand D, Woodruff RC (1998) Origin and decay of the P element-associated  
641 latitudinal cline in Australian *Drosophila melanogaster*. *Genetica*, **104**, 45–57.
- 642 Božičević V, Hutter S, Stephan W, Wollstein A (2016) Population genetic evidence for cold  
643 adaptation in European *Drosophila melanogaster* populations. *Molecular Ecology*, **25**, 1175–  
644 1191.
- 645 Buser CC, Newcomb RD, Gaskett AC, Goddard MR (2014) Niche construction initiates the evolution  
646 of mutualistic interactions. *Ecology Letters*, **17**, 1257–1264.

- 647 Caracristi G, Schlötterer C (2003) Genetic Differentiation Between American and European  
648 *Drosophila melanogaster* Populations Could Be Attributed to Admixture of African Alleles.  
649 *Molecular Biology and Evolution*, **20**, 792–799.
- 650 Cavalli-Sforza LL (1966) Population Structure and Human Evolution. *Proceedings of the Royal*  
651 *Society of London B*, **164**, 362–379.
- 652 Chandler JA, James PM (2013) Discovery of trypanosomatid parasites in globally distributed  
653 *Drosophila* species. *PLoS ONE*, **8**, e61937.
- 654 Chandler JA, Eisen JA, Kopp A (2012) Yeast communities of diverse *Drosophila* species:  
655 comparison of two symbiont groups in the same hosts. *Applied and Environmental Microbiology*,  
656 **78**, 7327–7336.
- 657 Charlesworth B, Sniegowski P, Stephan W (1994) The evolutionary dynamics of repetitive DNA in  
658 eukaryotes. *Nature*, **371**, 215–220.
- 659 Cheng C, White BJ, Kamdem C *et al.* (2012) Ecological genomics of *Anopheles gambiae* along a  
660 latitudinal cline: a population-resequencing approach. *Genetics*, **190**, 1417–1432.
- 661 Clemente F, Vogl C (2012) Unconstrained evolution in short introns? – An analysis of genome-wide  
662 polymorphism and divergence data from *Drosophila*. *Journal of Evolutionary Biology*, **25**, 1975–  
663 1990.
- 664 Cooper BS, Burrus CR, Ji C, Hahn MW, Montooth KL (2015) Similar Efficacies of Selection Shape  
665 Mitochondrial and Nuclear Genes in Both *Drosophila melanogaster* and *Homo sapiens*. *G3*, **5**,  
666 2165–2176.
- 667 Cridland JM, Macdonald SJ, Long AD, Thornton KR (2013) Abundance and distribution of  
668 transposable elements in two *Drosophila* QTL mapping resources. *Molecular Biology and*  
669 *Evolution*, **30**, 2311–2327.
- 670 Daborn PJ, Yen JL, Bogwitz MR *et al.* (2002) A single p450 allele associated with insecticide  
671 resistance in *Drosophila*. *Science*, **297**, 2253–2256.
- 672 David JR, Capy P (1988) Genetic variation of *Drosophila melanogaster* natural populations. *Trends*  
673 *in Genetics*, **4**, 106–111.

- 674 de Jong G, Bochdanovits Z (2003) Latitudinal clines in *Drosophila melanogaster*: body size,  
675 allozyme frequencies, inversion frequencies, and the insulin-signalling pathway. *Journal of*  
676 *Genetics*, **82**, 207–223.
- 677 Dobzhansky T (1970) *Genetics of the Evolutionary Process*. Columbia University Press.
- 678 Duchen P, Zivkovic D, Hutter S, Stephan W, Laurent S (2013) Demographic inference reveals  
679 African and European admixture in the North American *Drosophila melanogaster* population.  
680 *Genetics*, **193**, 291–301.
- 681 Durmaz E, Benson C, Kapun M, Schmidt P, Flatt T (2018) An Inversion Supergene in *Drosophila*  
682 Underpins Latitudinal Clines in Survival Traits. *Journal of Evolutionary Biology*, **31**, 1354-1364..
- 683 Durmaz E, Rajpurohit S, Betancourt N, Fabian DK, Kapun M, Schmidt P, Flatt T (2019) A clinal  
684 polymorphism in the insulin signaling transcription factor *foxo* contributes to life-history  
685 adaptation in *Drosophila*. *Evolution*, **73**, 1774-1792.
- 686 Elya C, Lok TC, Spencer QE, McCausland H, Martinez CC, Eisen MB (2018) Robust manipulation  
687 of the behavior of *Drosophila melanogaster* by a fungal pathogen in the laboratory, *eLife*, **7**,  
688 e34414
- 689 Fabian DK, Kapun M, Nolte V *et al.* (2012) Genome-wide patterns of latitudinal differentiation  
690 among populations of *Drosophila melanogaster* from North America. *Molecular Ecology*, **21**,  
691 4748–4769.
- 692 Fiston-Lavier A-S, Barrón MG, Petrov DA, González J (2015) T-lex2: genotyping, frequency  
693 estimation and re-annotation of transposable elements using single or pooled next-generation  
694 sequencing data. *Nucleic Acids Research*, **43**, e22–e22.
- 695 Fiston-Lavier A-S, Singh ND, Lipatov M, Petrov DA (2010) *Drosophila melanogaster* recombination  
696 rate calculator. *Gene*, **463**, 18–20.
- 697 Francalacci P, Sanna D (2008) History and geography of human Y-chromosome in Europe: a SNP  
698 perspective. *Journal of Anthropological Sciences*, **86**, 59–89.
- 699 Futschik A & Schlötterer C (2010) The next generation of molecular markers from massively parallel  
700 sequencing of pooled DNA samples. *Genetics*, **186**, 207–218.

- 701 González J, Karasov TL, Messer PW, Petrov DA (2010) Genome-Wide Patterns of Adaptation to  
702 Temperate Environments Associated with Transposable Elements in *Drosophila*. *PLoS Genetics*,  
703 **6**, e1000905.
- 704 González J, Lenkov K, Lipatov M, Macpherson JM, Petrov DA (2008) High Rate of Recent  
705 Transposable Element–Induced Adaptation in *Drosophila melanogaster*. *PLoS Biology*, **6**, e251.
- 706 Haas F, Brodin A. (2005). The Crow *Corvus corone* hybrid zone in southern Denmark and northern  
707 Germany. *Ibis* **147**:649–656.
- 708 Haddrill PR, Charlesworth B, Halligan DL, Andolfatto P (2005) Patterns of intron sequence  
709 evolution in *Drosophila* are dependent upon length and GC content. *Genome Biology*, **6**, R67.
- 710 Hales KG, Korey CA, Larracuenta AM, Roberts DM (2015) Genetics on the Fly: A Primer on the  
711 *Drosophila* Model System. *Genetics*, **201**, 815–842.
- 712 Halligan DL, Keightley PD 2006 Ubiquitous selective constraints in the *Drosophila* genome revealed  
713 by a genome-wide interspecies comparison. *Genome Research*, **16**, 875-884.
- 714 Harpur BA, Kent CF, Molodtsova D *et al.* (2014) Population genomics of the honey bee reveals  
715 strong signatures of positive selection on worker traits. *Proceedings of the National Academy of*  
716 *Sciences of the United States of America*, **111**, 2614–2619.
- 717 Haselkorn TS, Markow TA, Moran NA (2009) Multiple introductions of the *Spiroplasma* bacterial  
718 endosymbiont into *Drosophila*. *Molecular Ecology*, **18**, 1294–1305.
- 719 Haudry A, Laurent S, Kapun M. 2020. Population Genomics on the Fly: Recent Advances in  
720 *Drosophila*. In: Dutheil JY, editor. *Statistical Population Genomics*. Vol. 2090. New York, NY:  
721 Springer US. p. 357–396.
- 722 Hewitt GM. (1999). Post-glacial re-colonization of European biota. *Biological Journal of the Linnean*  
723 *Society* **68**:87–112.
- 724 Hijmans RJ, Cameron SE, Parra JL, Jones PG, Jarvis A. 2005. Very high resolution interpolated  
725 climate surfaces for global land areas. *Int. J. Climatol.* **25**:1965–1978.
- 726 Hohenlohe PA, Bassham S, Etter PD *et al.* (2010) Population Genomics of Parallel Adaptation in  
727 Threespine Stickleback using Sequenced RAD Tags. *PLoS Genetics*, **6**, e1000862.

- 728 Hoffmann AA, Weeks AR (2007) Climatic selection on genes and traits after a 100 year-old invasion:  
729 a critical look at the temperate-tropical clines in *Drosophila melanogaster* from eastern Australia.  
730 *Genetica*, **129**, 133–147.
- 731 Huang DW, Sherman BT, Lempicki RA (2009) Systematic and integrative analysis of large gene lists  
732 using DAVID bioinformatics resources. *Nature Protocols*, **4**, 44–57.
- 733 Hudson RR, Kreitman M, Aguadé M (1987) A test of neutral molecular evolution based on nucleotide  
734 data. *Genetics*, **116**, 153–159.
- 735 Hutter S, Li H, Beisswanger S, De Lorenzo D, Stephan W (2007) Distinctly Different Sex Ratios in  
736 African and European Populations of *Drosophila melanogaster* Inferred From Chromosomewide  
737 Single Nucleotide Polymorphism Data. *Genetics*, **177**, 469–480.
- 738 Kaminker, J.S., Bergman, C.M., Kronmiller, B. *et al.* (2002) The transposable elements of  
739 the *Drosophila melanogaster* euchromatin: a genomics perspective. *Genome Biol.*,  
740 **3**, research0084.
- 741 Kao JY, Zubair A, Salomon MP, Nuzhdin SV, Campo D (2015) Population genomic analysis  
742 uncovers African and European admixture in *Drosophila melanogaster* populations from the  
743 south-eastern United States and Caribbean Islands. *Molecular Ecology*, **24**, 1499–1509.
- 744 Kapopoulou A, Kapun M, Pavlidis P, *et al.* (2018a) Early split between African and European  
745 populations of *Drosophila melanogaster*. Preprint at *bioRxiv*, doi: <https://doi.org/10.1101/340422>
- 746 Kapopoulou A, Pfeifer S, Jensen J, Laurent S (2018b). The demographic history of African  
747 *Drosophila melanogaster*. Preprint at *bioRxiv*, doi:10.1101/340406
- 748 Kapun M, Flatt T (2019) The adaptive significance of chromosomal inversion polymorphisms in  
749 *Drosophila melanogaster*. *Molecular Ecology*, **28**, 1263-1282
- 750 Kapun M, Fabian DK, Goudet J, Flatt T (2016a) Genomic Evidence for Adaptive Inversion Clines in  
751 *Drosophila melanogaster*. *Molecular Biology and Evolution*, **33**, 1317–1336.
- 752 Kapun M, Schmidt C, Durmaz E, Schmidt PS, Flatt T (2016b) Parallel effects of the inversion  
753 *In(3R)Payne* on body size across the North American and Australian clines in *Drosophila*  
754 *melanogaster*. *Journal of Evolutionary Biology*, **29**, 1059–1072.

- 755 Kapun M, van Schalkwyk H, McAllister B, Flatt T, Schlötterer C (2014) Inference of chromosomal  
756 inversion dynamics from Pool-Seq data in natural and laboratory populations of *Drosophila*  
757 *melanogaster*. *Molecular Ecology*, **23**, 1813–1827.
- 758 Keller A (2007) *Drosophila melanogaster*'s history as a human commensal. *Current Biology*, **17**,  
759 R77–R81.
- 760 Kennington JW, Partridge L, Hoffmann AA (2006) Patterns of Diversity and Linkage Disequilibrium  
761 Within the Cosmopolitan Inversion *In(3R)Payne* in *Drosophila melanogaster* Are Indicative of  
762 Coadaptation. *Genetics*, **172**, 1655 – 1663.
- 763 Kimura M (1984) *The Neutral Theory of Molecular Evolution*. Cambridge University Press.
- 764 Knibb WR, Oakeshott JG, Gibson JB (1981) Chromosome Inversion Polymorphisms in *Drosophila*  
765 *melanogaster*. I. Latitudinal Clines and Associations between Inversions in Australasian  
766 Populations. *Genetics*, **98**, 833–847.
- 767 Knief U, Bossu CM, Saino N, Hansson B, Poelstra J, Vijay N, Weissensteiner M, Wolf JBW. (2019).  
768 Epistatic mutations under divergent selection govern phenotypic variation in the crow hybrid  
769 zone. *Nat Ecol Evol*, **3**, 570–576.
- 770 Kofler R, Schlötterer C (2012) GOwinda: Unbiased analysis of gene set enrichment for genome-wide  
771 association studies. *Bioinformatics*, **28**, 2084–2085.
- 772 Kofler R, Betancourt AJ, Schlötterer C (2012) Sequencing of pooled DNA samples (Pool-Seq)  
773 uncovers complex dynamics of transposable element insertions in *Drosophila melanogaster*.  
774 *PLoS Genetics*, **8**, e1002487.
- 775 Kofler R, Orozco-terWengel P, De Maio N *et al.* (2011) PoPoolation: A Toolbox for Population  
776 Genetic Analysis of Next Generation Sequencing Data from Pooled Individuals. *PLoS ONE*, **6**,  
777 e15925.
- 778 Kolaczowski B, Kern AD, Holloway AK, Begun DJ (2011) Genomic Differentiation Between  
779 Temperate and Tropical Australian Populations of *Drosophila melanogaster*. *Genetics*, **187**, 245–  
780 260.
- 781 Kreitman M (1983) Nucleotide polymorphism at the alcohol dehydrogenase locus of *Drosophila*  
782 *melanogaster*. *Nature*, **304**, 412–417.

- 783 Kriesner P, Conner WR, Weeks AR, Turelli M, Hoffmann AA (2016) Persistence of a *Wolbachia*  
784 infection frequency cline in *Drosophila melanogaster* and the possible role of reproductive  
785 dormancy. *Evolution*, **70**, 979–997.
- 786 Lachaise D, Cariou M-L, David JR *et al.* (1988) Historical Biogeography of the *Drosophila*  
787 *melanogaster* Species Subgroup. In Hecht MK, Wallace B, Prance GT (Eds.) *Evolutionary*  
788 *Biology* (pp. 159–225) Boston: Springer.
- 789 Lack JB, Cardeno CM, Crepeau MW *et al.* (2015) The *Drosophila* genome nexus: a population  
790 genomic resource of 623 *Drosophila melanogaster* genomes, including 197 from a single  
791 ancestral range population. *Genetics*, **199**, 1229–1241.
- 792 Lack JB, Lange JD, Tang AD, Corbett-Detig RB, Pool JE (2016) A Thousand Fly Genomes: An  
793 Expanded *Drosophila* Genome Nexus. *Molecular Biology and Evolution*, **33**, 3308–3313.
- 794 Langley CH, Stevens K, Cardeno C *et al.* (2012) Genomic variation in natural populations of  
795 *Drosophila melanogaster*. *Genetics*, **192**, 533–598.
- 796 Larracuente AM, Roberts DM (2015) Genetics on the Fly: A Primer on the *Drosophila* Model  
797 System. *Genetics* **201**, 815–842.
- 798 Lawrie DS, Messer PW, Hershberg R, Petrov DA (2013) Strong Purifying Selection at Synonymous  
799 Sites in *D. melanogaster*. *PLoS Genetics*, **9**, e1003527.
- 800 Lerat E, Goubert C, Guirao-Rico S, Merenciano M, Dufour A-B, Vieira C, González J (2019)  
801 Population-specific dynamics and selection patterns of transposable element insertions in  
802 European natural populations. *Molecular Ecology*, **28**, 1506–1522.
- 803 Lemeunier F, Aulard S (1992). Inversion polymorphism in *Drosophila melanogaster*. In: Krimbas  
804 CB, & Powell JR (Eds.), *Drosophila Inversion Polymorphism* (pp. 339–405), New York: CRC  
805 Press.
- 806 Lewontin RC (1974) *The Genetic Basis of Evolutionary Change*. Columbia University Press.
- 807 Li H, Ruan J, Durbin R (2008) Mapping short DNA sequencing reads and calling variants using  
808 mapping quality scores. *Genome Research*, **18**, 1851–1858.
- 809 Li H, Stephan W (2006) Inferring the Demographic History and Rate of Adaptive Substitution in  
810 *Drosophila*. *PLoS Genetics* **2**, 10.

- 811 Machado HE, Bergland AO, O'Brien KR *et al.* (2016) Comparative population genomics of  
812 latitudinal variation in *Drosophila simulans* and *Drosophila melanogaster*. *Molecular Ecology*,  
813 **25**, 723–740.
- 814 Machado H, Bergland AO, Taylor R *et al.* (2019) Broad geographic sampling reveals predictable,  
815 pervasive, and strong seasonal adaptation in *Drosophila*. Preprint at *bioRxiv*, doi:  
816 <https://doi.org/10.1101/337543>.
- 817 Macholán M, Baird SJ, Munclinger P, Dufková P, Bímová B, Piálek J. (2008). Genetic conflict  
818 outweighs heterogametic incompatibility in the mouse hybrid zone? *BMC Evolutionary Biology*  
819 **8**:271.
- 820 Martino ME, Ma D, Leulier F (2017) Microbial influence on *Drosophila* biology. *Current Opinion in*  
821 *Microbiology*, **38**, 165–170.
- 822 Mateo L, Rech GE, González J (2018) Genome-wide patterns of local adaptation in *Drosophila*  
823 *melanogaster*: adding intra European variability to the map. Preprint at *bioRxiv*, doi:  
824 <https://doi.org/10.1101/269332>
- 825 McDonald JH, Kreitman M (1991) Adaptive protein evolution at the *Adh* locus in *Drosophila*.  
826 *Nature*, **351**, 652–654.
- 827 Mettler LE, Voelker RA, Mukai T (1977) Inversion Clines in Populations of *Drosophila*  
828 *melanogaster*. *Genetics*, **87**, 169–176.
- 829 Meyer F, Paarmann D, D'Souza M *et al.* (2008) The metagenomics RAST server - a public resource  
830 for the automatic phylogenetic and functional analysis of metagenomes. *BMC Bioinformatics*, **9**,  
831 386.
- 832 Michalakis Y, Veuille M (1996) Length variation of CAG/CAA trinucleotide repeats in natural  
833 populations of *Drosophila melanogaster* and its relation to the recombination rate. *Genetics*, **143**,  
834 1713–1725.
- 835 Nielsen R, Akey JM, Jakobsson M *et al.* (2017) Tracing the peopling of the world through genomics.  
836 *Nature*, **541**, 302-310.
- 837 Novembre J, Johnson T, Bryc K, *et al.* (2008) Genes mirror geography within Europe. *Nature*, **456**,  
838 98-101.



- 839 Paaby AB, Bergland AO, Behrman EL, Schmidt PS (2014) A highly pleiotropic amino acid  
840 polymorphism in the *Drosophila* insulin receptor contributes to life-history adaptation. *Evolution*,  
841 **68**, 3395-3409.
- 842 Paaby AB, Blacket MJ, Hoffmann AA, Schmidt PS (2010) Identification of a candidate adaptive  
843 polymorphism for *Drosophila* life history by parallel independent clines on two continents.  
844 *Molecular Ecology*, **19**, 760-774.
- 845 Palmer WH, Medd NC, Beard PM, Obbard DJ (2018) Isolation of a natural DNA virus of *Drosophila*  
846 melanogaster, and characterisation of host resistance and immune responses. *PLOS Pathogens*,  
847 **14**, e1007050
- 848 Parsch J, Novozhilov S, Saminadin-Peter SS, Wong KM, Andolfatto P (2010) On the utility of short  
849 intron sequences as a reference for the detection of positive and negative selection in *Drosophila*.  
850 *Molecular Biology and Evolution*, **27**, 1226–1234.
- 851 Peel MC, Finlayson BL, McMahon TA (2007) Updated world map of the Köppen-Geiger climate  
852 classification. *Hydrology and Earth System Sciences*, **11**, 1633–1644.
- 853 Petrov DA, Fiston-Lavier AS, Lipatov M, Lenkov K, González J (2011) Population Genomics of  
854 Transposable Elements in *Drosophila melanogaster*. *Molecular Biology and Evolution*, **28**,  
855 1633–1644.
- 856 Pool JE, Braun DT, Lack JB (2016) Parallel Evolution of Cold Tolerance Within *Drosophila*  
857 *melanogaster*. *Molecular Biology and Evolution*, **34**, 349–360.
- 858 Pool JE, Corbett-Detig RB, Sugino RP *et al.* (2012) Population Genomics of Sub-Saharan *Drosophila*  
859 *melanogaster*: African Diversity and Non-African Admixture. *PLoS Genetics*, **8**, e1003080.
- 860 Powell JR (1997) *Progress and Prospects in Evolutionary Biology: The Drosophila Model*. Oxford  
861 University Press.
- 862 Quesneville H, Bergman CM, Andrieu O, Autard D, Nouaud D, et al. (2005) Combined evidence  
863 annotation of transposable elements in genome sequences. *PLoS Comp Biol* **1**(2): e22.
- 864 Rako L, Anderson AR, Sgrò CM, Stocker AJ, Hoffmann AA (2006) The association between  
865 inversion *In(3R)Payne* and clinally varying traits in *Drosophila melanogaster*. *Genetica*, **128**,  
866 373–384.

- 867 Rane RV, Rako L, Kapun M, LEE SF (2015) Genomic evidence for role of inversion *3RP* of  
868 *Drosophila melanogaster* in facilitating climate change adaptation. *Molecular Ecology*, **24**,  
869 2423–2432.
- 870 Rech GE, Bogaerts-Márquez M, Barrón MG, Merenciano M, Villanueva-Cañas JL, Horváth V,  
871 Fiston-Lavier A-S, Luyten I, Venkataram S, Quesneville H, Petrov DA, González J (2019) Stress  
872 response, behavior, and development are shaped by transposable element-induced mutations in  
873 *Drosophila*. *PLOS Genetics*, **15**, e1007900.
- 874 Richardson MF, Weinert LA, Welch JJ *et al.* (2012) Population Genomics of the *Wolbachia*  
875 Endosymbiont in *Drosophila melanogaster*. *PLoS Genetics*, **8**, e1003129.
- 876 Rogers RL, Hartl DL (2012) Chimeric genes as a source of rapid evolution in *Drosophila*  
877 *melanogaster*. *Molecular Biology and Evolution*, **29**, 517–529.
- 878 Schlötterer C, Tobler R, Kofler R, Nolte V (2014) Sequencing pools of individuals - mining genome-  
879 wide polymorphism data without big funding. *Nature Reviews Genetics*, **15**, 749–763.
- 880 Schmidt PS, Paaby AB (2008) Reproductive Diapause and Life-History Clines in North American  
881 Populations of *Drosophila melanogaster*. *Evolution*, **62**, 1204–1215.
- 882 Schmidt PS, Zhu CT, Das J *et al.* (2008) An amino acid polymorphism in the *couch potato* gene  
883 forms the basis for climatic adaptation in *Drosophila melanogaster*. *Proceedings of the National*  
884 *Academy of Sciences of the United States of America*, **105**, 16207–16211.
- 885 Singh ND, Arndt PF, Clark AG, Aquadro CF (2009) Strong evidence for lineage and sequence  
886 specificity of substitution rates and patterns in *Drosophila*. *Molecular Biology and Evolution*, **26**,  
887 1591–1605.
- 888 Sprengelmeyer QD, Mansourian S, Lange JD, Matute DR, Cooper BS, Jirle EV, Stensmyr MC, Pool  
889 JE. (2020). Recurrent Collection of *Drosophila melanogaster* from Wild African Environments  
890 and Genomic Insights into Species History. *Mol Biol Evol* **37**:627–638.
- 891 Staubach F, Baines JF, Künzel S, Bik EM, Petrov DA (2013) Host species and environmental effects  
892 on bacterial communities associated with *Drosophila* in the laboratory and in the natural  
893 environment. *PLoS ONE*, **8**, e70749.

- 894 Szymura JM, Barton NH. (1986). Genetic analysis of a hybrid zone between the fire-bellied toads,  
895 *Bombina bombina* and *B. variegata*, near Cracow in Southern Poland. *Evolution* **40**:1141–1159.
- 896 Tauber E, Zordan M, Sandrelli F, Pegoraro M, Osterwalder N, Breda C, Daga A, Selmin A, Monger  
897 K, Benna C, Rosata E, Kyriacou CP, Costa R (2007) Natural selection favors a newly derived  
898 *timeless* allele in *Drosophila melanogaster*. *Science*, **316**,1895-1899.
- 899 Trinder M, Daisley BA, Dube JS, Reid G (2017) *Drosophila melanogaster* as a High-Throughput  
900 Model for Host-Microbiota Interactions. *Frontiers in Microbiology*, **8**, 751.
- 901 Turner TL, Levine MT, Eckert ML, Begun DJ (2008) Genomic analysis of adaptive differentiation in  
902 *Drosophila melanogaster*. *Genetics*, **179**, 455–473.
- 903 Umina PA, Weeks AR, Kearney MR, McKechnie SW, Hoffmann AA (2005) A rapid shift in a classic  
904 clinal pattern in *Drosophila* reflecting climate change. *Science*, **308**, 691–693.
- 905 Unckless RL (2011) A DNA virus of *Drosophila*. *PLoS ONE*, **6**, e26564.
- 906 de Villemereuil P, Gaggiotti OE (2015) A new FST-based method to uncover local adaptation using  
907 environmental variables. *Methods in Ecology and Evolution*. **6**: 1248 – 1258.
- 908 Walters AM, Matthews MK, Hughes R, Malcolm Jaanna, Rudman S, Newell PD, Douglas AE,  
909 Schmidt PS, Chaston JM (2018) The microbiota influences the *Drosophila melanogaster* life  
910 history strategy. bioRxiv. 471540
- 911 Wang Y, Kapun M, Waidele L, Kuenzel S, Bergland AO, Staubach F. (2020). Common structuring  
912 principles of the *Drosophila melanogaster* microbiome on a continental scale and between host  
913 and substrate. *Environmental Microbiology Reports* **12**:220–228.
- 914 Wang Y, Staubach F (2018); Individual variation of natural *D.melanogaster*-associated bacterial  
915 communities, *FEMS Microbiology Letters*, **365**, fny017
- 916 Webster CL, Longdon B, Lewis SH, Obbard DJ (2016) Twenty-Five New Viruses Associated with  
917 the Drosophilidae (Diptera). *Evolutionary Bioinformatics Online*, **12**, 13–25.
- 918 Webster CL, Waldron FM, Robertson S *et al.* (2015) The Discovery, Distribution, and Evolution of  
919 Viruses Associated with *Drosophila melanogaster*. *PLoS Biology*, **13**, e1002210.
- 920 Werren JH, Baldo L, Clark ME (2008) Wolbachia: master manipulators of invertebrate biology.  
921 *Nature Reviews Microbiology*, **6**, 741–751.

- 922 Whitlock MC, McCauley DE (1999) Indirect measures of gene flow and migration:  $F_{ST} \approx 1/(4Nm+1)$ .  
923 *Heredity*, **82**, 117–125.
- 924 Wilfert L, Longdon B, Ferreira AGA, Bayer F, Jiggins FM (2011) Trypanosomatids are common and  
925 diverse parasites of *Drosophila*. *Parasitology*, **138**, 858–865.
- 926 Wolff JN, Camus MF, Clancy DJ, Dowling DK (2016) Complete mitochondrial genome sequences of  
927 thirteen globally sourced strains of fruit fly (*Drosophila melanogaster*) form a powerful model  
928 for mitochondrial research. *Mitochondrial DNA Part A*, **27**, 4672–4674.
- 929 Wright S (1951) The genetical structure of populations. *Ann Eugen* **15**, 323–354.
- 930 Xiao F-X, Yotova V, Zietkiewicz E *et al.* (2004) Human X-chromosomal lineages in Europe reveal  
931 Middle Eastern and Asiatic contacts. *European Journal of Human Genetics*, **12**, 301–311.
- 932 Yukilevich R, True JR (2008a) Incipient sexual isolation among cosmopolitan *Drosophila*  
933 *melanogaster* populations. *Evolution*, **62**, 2112–2121.
- 934 Yukilevich R, True JR (2008b) African morphology, behavior and pheromones underlie incipient  
935 sexual isolation between us and Caribbean *Drosophila melanogaster*. *Evolution*, **62**, 2807–2828.
- 936 Zanini F, Brodin J, Thebo L *et al.* (2015) Population genomics of intrapatient HIV-1 evolution. *eLife*,  
937 **4**, e11282.

938 **Tables**

939 **Table 1. Sample information for all populations in the *DrosEU* dataset.** Origin, collection date, season and sample size (number of chromosomes: *n*) of  
 940 the 48 samples in the *DrosEU* 2014 data set. Additional information can be found in supplementary table S1 (Supplementary Material online).

| <b>ID</b>    | <b>Country</b>    | <b>Location</b>   | <b>Coll. Date</b> | <b>Numbe<br/>r ID</b> | <b>Lat<br/>(°)</b> | <b>Lon (°)</b> | <b>Alt<br/>(m)</b> | <b>Season</b> | <b>n</b> | <b>Coll. name</b>              |
|--------------|-------------------|-------------------|-------------------|-----------------------|--------------------|----------------|--------------------|---------------|----------|--------------------------------|
| AT_Mau_14_01 | Austria           | Mauternbach       | 2014-07-20        | 1                     | 48.38              | 15.56          | 572                | S             | 80       | Andrea J. Betancourt           |
| AT_Mau_14_02 | Austria           | Mauternbach       | 2014-10-19        | 2                     | 48.38              | 15.56          | 572                | F             | 80       | Andrea J. Betancourt           |
| TR_Yes_14_03 | Turkey            | Yesiloz           | 2014-08-31        | 3                     | 40.23              | 32.26          | 680                | S             | 80       | Banu Sebnem Onder              |
| TR_Yes_14_04 | Turkey            | Yesiloz           | 2014-10-23        | 4                     | 40.23              | 32.26          | 680                | F             | 80       | Banu Sebnem Onder              |
| FR_Vil_14_05 | France            | Viltain           | 2014-08-18        | 5                     | 48.75              | 2.16           | 153                | S             | 80       | Catherine Montchamp-<br>Moreau |
| FR_Vil_14_07 | France            | Viltain           | 2014-10-27        | 7                     | 48.75              | 2.16           | 153                | F             | 80       | Catherine Montchamp-<br>Moreau |
| FR_Got_14_08 | France            | Gotheron          | 2014-07-08        | 8                     | 44.98              | 4.93           | 181                | S             | 80       | Cristina Vieira                |
| UK_She_14_09 | United<br>Kingdom | Sheffield         | 2014-08-25        | 9                     | 53.39              | -1.52          | 100                | S             | 80       | Damiano Porcelli               |
| UK_Sou_14_10 | United            | South Queensferry | 2014-07-14        | 10                    | 55.97              | -3.35          | 19                 | S             | 80       | Darren Obbard                  |

|              |         |                   |            |    |       |       |     |   |    |                      |
|--------------|---------|-------------------|------------|----|-------|-------|-----|---|----|----------------------|
|              | Kingdom |                   |            |    |       |       |     |   |    |                      |
| CY_Nic_14_11 | Cyprus  | Nicosia           | 2014-08-10 | 11 | 35.07 | 33.32 | 263 | S | 80 | Eliza Argyridou      |
|              | United  |                   |            |    |       |       |     |   |    |                      |
| UK_Mar_14_12 | Kingdom | Market Harborough | 2014-10-20 | 12 | 52.48 | -0.92 | 80  | F | 80 | Eran Tauber          |
|              | United  |                   |            |    |       |       |     |   |    |                      |
| UK_Lut_14_13 | Kingdom | Lutterworth       | 2014-10-20 | 13 | 52.43 | -1.10 | 126 | F | 80 | Eran Tauber          |
| DE_Bro_14_14 | Germany | Broggingen        | 2014-06-26 | 14 | 48.22 | 7.82  | 173 | S | 80 | Fabian Staubach      |
| DE_Bro_14_15 | Germany | Broggingen        | 2014-10-15 | 15 | 48.22 | 7.82  | 173 | F | 80 | Fabian Staubach      |
| UA_Yal_14_16 | Ukraine | Yalta             | 2014-06-20 | 16 | 44.50 | 34.17 | 72  | S | 80 | Iryna Kozeretska     |
| UA_Yal_14_18 | Ukraine | Yalta             | 2014-08-27 | 18 | 44.50 | 34.17 | 72  | S | 80 | Iryna Kozeretska     |
| UA_Ode_14_19 | Ukraine | Odesa             | 2014-07-03 | 19 | 46.44 | 30.77 | 54  | S | 80 | Iryna Kozeretska     |
| UA_Ode_14_20 | Ukraine | Odesa             | 2014-07-22 | 20 | 46.44 | 30.77 | 54  | S | 80 | Iryna Kozeretska     |
| UA_Ode_14_21 | Ukraine | Odesa             | 2014-08-29 | 21 | 46.44 | 30.77 | 54  | S | 80 | Iryna Kozeretska     |
| UA_Ode_14_22 | Ukraine | Odesa             | 2014-10-10 | 22 | 46.44 | 30.77 | 54  | F | 80 | Iryna Kozeretska     |
| UA_Kyi_14_23 | Ukraine | Kyiv              | 2014-08-09 | 23 | 50.34 | 30.49 | 179 | S | 80 | Iryna Kozeretska     |
| UA_Kyi_14_24 | Ukraine | Kyiv              | 2014-09-08 | 24 | 50.34 | 30.49 | 179 | F | 80 | Iryna Kozeretska     |
| UA_Var_14_25 | Ukraine | Varva             | 2014-08-18 | 25 | 50.48 | 32.71 | 125 | S | 80 | Oleksandra Protsenko |

|              |             |                    |            |    |       |       |     |   |    |                      |
|--------------|-------------|--------------------|------------|----|-------|-------|-----|---|----|----------------------|
| UA_Pyr_14_26 | Ukraine     | Pyriatyn           | 2014-08-20 | 26 | 50.25 | 32.52 | 114 | S | 80 | Oleksandra Protsenko |
| UA_Dro_14_27 | Ukraine     | Drogobych          | 2014-08-24 | 27 | 49.33 | 23.50 | 275 | S | 80 | Iryna Kozeretska     |
| UA_Cho_14_28 | Ukraine     | Chornobyl          | 2014-09-13 | 28 | 51.37 | 30.14 | 121 | F | 80 | Iryna Kozeretska     |
| UA_Cho_14_29 | Ukraine     | Chornobyl Yaniv    | 2014-09-13 | 29 | 51.39 | 30.07 | 121 | F | 80 | Iryna Kozeretska     |
| SE_Lun_14_30 | Sweden      | Lund               | 2014-07-31 | 30 | 55.69 | 13.20 | 51  | S | 80 | Jessica Abbott       |
| DE_Mun_14_31 | Germany     | Munich             | 2014-06-19 | 31 | 48.18 | 11.61 | 520 | S | 80 | John Parsch          |
| DE_Mun_14_32 | Germany     | Munich             | 2014-09-03 | 32 | 48.18 | 11.61 | 520 | F | 80 | John Parsch          |
| PT_Rec_14_33 | Portugal    | Recarei            | 2014-09-26 | 33 | 41.15 | -8.41 | 175 | F | 80 | Jorge Vieira         |
| ES_Gim_14_34 | Spain       | Gimenells (Lleida) | 2014-10-20 | 34 | 41.62 | 0.62  | 173 | F | 80 | Lain Guio            |
| ES_Gim_14_35 | Spain       | Gimenells (Lleida) | 2014-08-13 | 35 | 41.62 | 0.62  | 173 | S | 80 | Lain Guio            |
| FI_Aka_14_36 | Finland     | Akaa               | 2014-07-25 | 36 | 61.10 | 23.52 | 88  | S | 80 | Maaria Kankare       |
| FI_Aka_14_37 | Finland     | Akaa               | 2014-08-27 | 37 | 61.10 | 23.52 | 88  | S | 80 | Maaria Kankare       |
| FI_Ves_14_38 | Finland     | Vesanto            | 2014-07-26 | 38 | 62.55 | 26.24 | 121 | S | 66 | Maaria Kankare       |
| DK_Kar_14_39 | Denmark     | Karensminde        | 2014-09-01 | 39 | 55.95 | 10.21 | 15  | F | 80 | Mads Fristrup Schou  |
| DK_Kar_14_41 | Denmark     | Karensminde        | 2014-11-25 | 41 | 55.95 | 10.21 | 15  | F | 80 | Mads Fristrup Schou  |
| CH_Cha_14_42 | Switzerland | Chalet à Gobet     | 2014-07-24 | 42 | 46.57 | 6.70  | 872 | S | 80 | Martin Kapun         |
| CH_Cha_14_43 | Switzerland | Chalet à Gobet     | 2014-10-05 | 43 | 46.57 | 6.70  | 872 | F | 80 | Martin Kapun         |

|              |         |                    |            |    |       |       |     |   |    |                 |
|--------------|---------|--------------------|------------|----|-------|-------|-----|---|----|-----------------|
| AT_See_14_44 | Austria | Seeboden           | 2014-08-17 | 44 | 46.81 | 13.51 | 591 | S | 80 | Martin Kapun    |
| UA_Kha_14_45 | Ukraine | Kharkiv            | 2014-07-26 | 45 | 49.82 | 36.05 | 141 | S | 80 | Svitlana Serga  |
| UA_Kha_14_46 | Ukraine | Kharkiv            | 2014-09-14 | 46 | 49.82 | 36.05 | 141 | F | 80 | Svitlana Serga  |
|              |         | Chornobyl          |            |    |       |       |     |   |    |                 |
| UA_Cho_14_47 | Ukraine | Applegarden        | 2014-09-13 | 47 | 51.27 | 30.22 | 121 | F | 80 | Svitlana Serga  |
| UA_Cho_14_48 | Ukraine | Chornobyl Polisske | 2014-09-13 | 48 | 51.28 | 29.39 | 121 | F | 70 | Svitlana Serga  |
| UA_Kyi_14_49 | Ukraine | Kyiv               | 2014-10-11 | 49 | 50.34 | 30.49 | 179 | F | 80 | Svitlana Serga  |
| UA_Uma_14_50 | Ukraine | Uman               | 2014-10-01 | 50 | 48.75 | 30.21 | 214 | F | 80 | Svitlana Serga  |
| RU_Val_14_51 | Russia  | Valday             | 2014-08-17 | 51 | 57.98 | 33.24 | 217 | S | 80 | Elena Pasyukova |



942 **Table 2. Clinality of genetic variation and population structure.** Effects of geographic variables and/or seasonality on genome-wide average levels of  
 943 diversity ( $\pi$ ,  $\theta$  and Tajima's  $D$ ; top rows) and on the first three axes of a PCA based on allele frequencies at neutrally evolving sites (bottom rows). The values  
 944 represent  $F$ -ratios from general linear models. Bold type indicates  $F$ -ratios that are significant after Bonferroni correction (adjusted  $\alpha=0.0055$ ). Asterisks in  
 945 parentheses indicate significance when accounting for spatial autocorrelation by spatial error models. These models were only calculated when Moran's  $I$  test,  
 946 as shown in the last column, was significant. \* $p < 0.05$ ; \*\* $p < 0.01$ ; \*\*\* $p < 0.001$ .

947

| <i>Factor</i>    | <i>Latitude</i> | <i>Longitude</i>      | <i>Altitude</i> | <i>Season</i> | <i>Moran's I</i> |
|------------------|-----------------|-----------------------|-----------------|---------------|------------------|
| $\pi_{(X)}$      | 4.11*           | 1.62                  | <b>15.23***</b> | 1.65          | 0.86             |
| $\pi_{(Aut)}$    | 0.91            | 2.54                  | <b>27.18***</b> | 0.16          | -0.86            |
| $\theta_{(X)}$   | 2.65            | 1.31                  | <b>15.54***</b> | 2.22          | 0.24             |
| $\theta_{(Aut)}$ | 0.48            | 1.44                  | <b>13.66***</b> | 0.37          | -1.13            |
| $D_{(X)}$        | 0.02            | 0.38                  | 5.93*           | 3.26          | -2.08            |
| $D_{(Aut)}$      | 0.09            | 0.76                  | 5.33*           | 0.71          | -1.45            |
| PC1              | 0.63            | <b>118.08***(***)</b> | 3.64            | 0.75          | <b>4.2***</b>    |
| PC2              | <b>4.69*</b>    | <b>7.15*</b>          | <b>11.77**</b>  | 1.68          | -0.32            |
| PC3              | 0.39            | 0.23                  | <b>19.91***</b> | 0.28          | 1.38             |

948

949 **Table 3. Clinality and/or seasonality of chromosomal inversions.** The values represent *F*-ratios from generalized linear models with a binomial error  
 950 structure to account for frequency data. Bold type indicates deviance values that were significant after Bonferroni correction (adjusted  $\alpha$ '=0.0071). Stars in  
 951 parentheses indicate significance when accounting for spatial autocorrelation by spatial error models. These models were only calculated when Moran's *I* test,  
 952 as shown in the last column, was significant. \**p* < 0.05; \*\**p* < 0.01; \*\*\**p* < 0.001

953

| <i>Factor</i>      | <i>Latitude</i>      | <i>Longitude</i> | <i>Altitude</i> | <i>Season</i> | <i>Moran's I</i> |
|--------------------|----------------------|------------------|-----------------|---------------|------------------|
| <i>In(2L)t</i>     | 2.2                  | <b>10.09**</b>   | <b>43.94***</b> | 0.89          | -0.92            |
| <i>In(2R)NS</i>    | 0.25                 | <b>14.43***</b>  | 2.88            | 2.43          | 1.25             |
| <i>In(3L)P</i>     | <b>21.78***</b>      | 2.82             | 0.62            | 3.6           | -1.61            |
| <i>In(3R)C</i>     | <b>18.5*** (***)</b> | 0.75             | 1.42            | 0.04          | 2.79**           |
| <i>In(3R)Mo</i>    | 0.3                  | 0.09             | 0.35            | 0.03          | -0.9             |
| <i>In(3R)Payne</i> | <b>43.47***</b>      | 0.66             | 1.69            | 1.55          | -0.89            |

954 **FIGURE LEGENDS**

955

956 **Fig. 1. The geographic distribution of population samples.** Locations of all samples in the 2014  
957 *DrosEU* data set. The color of the circles indicates the sampling season for each location: ten of the  
958 32 locations were sampled at least twice, once in summer and once in fall (see table 1 and  
959 supplementary table S1, Supplementary Material online). Note that some of the 12 Ukrainian  
960 locations overlap in the map.

961 **Fig. 2. Signals of selective sweeps in European populations.** The central panel shows the  
962 distribution of Tajima's  $D$  in 50 kb sliding windows with 40 kb overlap, with red and green dashed  
963 lines indicating Tajima's  $D = 0$  and  $-1$ , respectively. The top panel shows a detail of a genomic region  
964 on chromosomal arm  $2R$  in the vicinity of *Cyp6g1* and *Hen1* (highlighted in red), genes reportedly  
965 involved in pesticide resistance. This strong sweep signal is characterized by an excess of low-  
966 frequency SNP variants and overall negative Tajima's  $D$  in all samples. Colored solid lines depict  
967 Tajima's  $D$  for each sample (see supplementary fig. S2 for color codes, Supplementary Material  
968 online); the black dashed line shows Tajima's  $D$  averaged across all samples. The bottom panel shows  
969 a region on  $3L$  previously identified as a potential target of selection, which shows a similar strong  
970 sweep signature. Notably, both regions show strongly reduced genetic variation (supplementary fig.  
971 S1, Supplementary Material online).

972 **Fig. 3. Genetic differentiation among European populations.** (A) Average  $F_{ST}$  among populations  
973 at putatively neutral sites. The centre plot shows the distribution of  $F_{ST}$  values for all 1,128 pairwise  
974 population comparisons, with the  $F_{ST}$  values for each comparison obtained from the mean across all  
975 4,034 SNPs used in the analysis. Plots on the left and the right show population pairs in the lower  
976 (blue) and upper (red) 5% tails of the  $F_{ST}$  distribution. (B) PCA analysis of allele frequencies at the  
977 same SNPs reveals population sub-structuring in Europe. Hierarchical model fitting using the first  
978 four PCs showed that the populations fell into two clusters (indicated by red and blue), with cluster  
979 assignment of each population subsequently estimated by  $k$ -means clustering. (C) Admixture  
980 proportions for each population inferred by model-based clustering with *ConStruct* are highlighted as

981 pie charts (left plot) or Structure plots (centre). The optimal number of 3 spatial layers (K) was  
982 inferred by cross-validation (right plot).

983 **Fig. 4. Manhattan plot of SNPs with  $q$ -values < 0.05 in association tests with PC1 or PC2 of the**  
984 **bioclimatic variables.** Vertical lines denote the breakpoints of common inversions. The gene names  
985 highlight some candidate genes found in our study and which have previously been identified as  
986 varying clinally by Fabian *et al.* (2012) and Machado *et al.* (2016) along the North American east  
987 coast. Note that for ease of plotting,  $q$ -values of 0 were set to 10% of the smallest observed  $q$ -value.

988

989 **Fig. 5. Mitochondrial haplotypes.** (A) TCS network showing the relationship of 5 common  
990 mitochondrial haplotypes; (B) estimated frequency of each mitochondrial haplotype in 48 European  
991 samples.

992 **Fig. 6. Geographic patterns in structural variants.** The upper panel shows stacked bar plots with  
993 the relative abundances of TEs in all 48 population samples. The proportion of each repeat class was  
994 estimated from sampled reads with dnaPipeTE (2 samples per run, 0.1X coverage per sample). The  
995 lower panel shows stacked bar plots depicting absolute frequencies of six cosmopolitan inversions in  
996 all 48 population samples.

997 **Fig. 7: Microbiome.** Relative abundance of *Drosophila*-associated microbes as assessed by  
998 MGRAST classified shotgun sequences. Microbes had to reach at least 3% relative abundance in one  
999 of the samples to be represented

1000

1001

1002 **Figure 1**

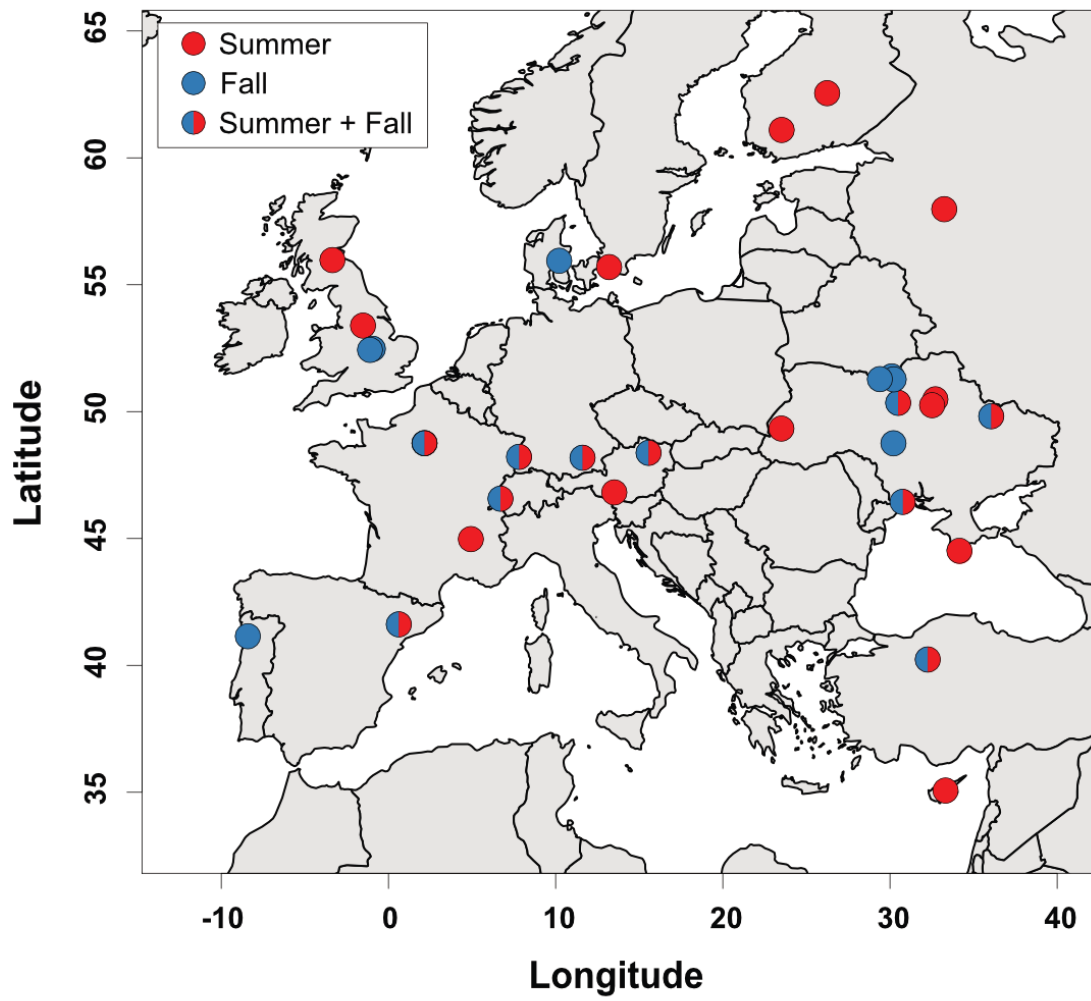

1003

1004

1005 **Figure 2**

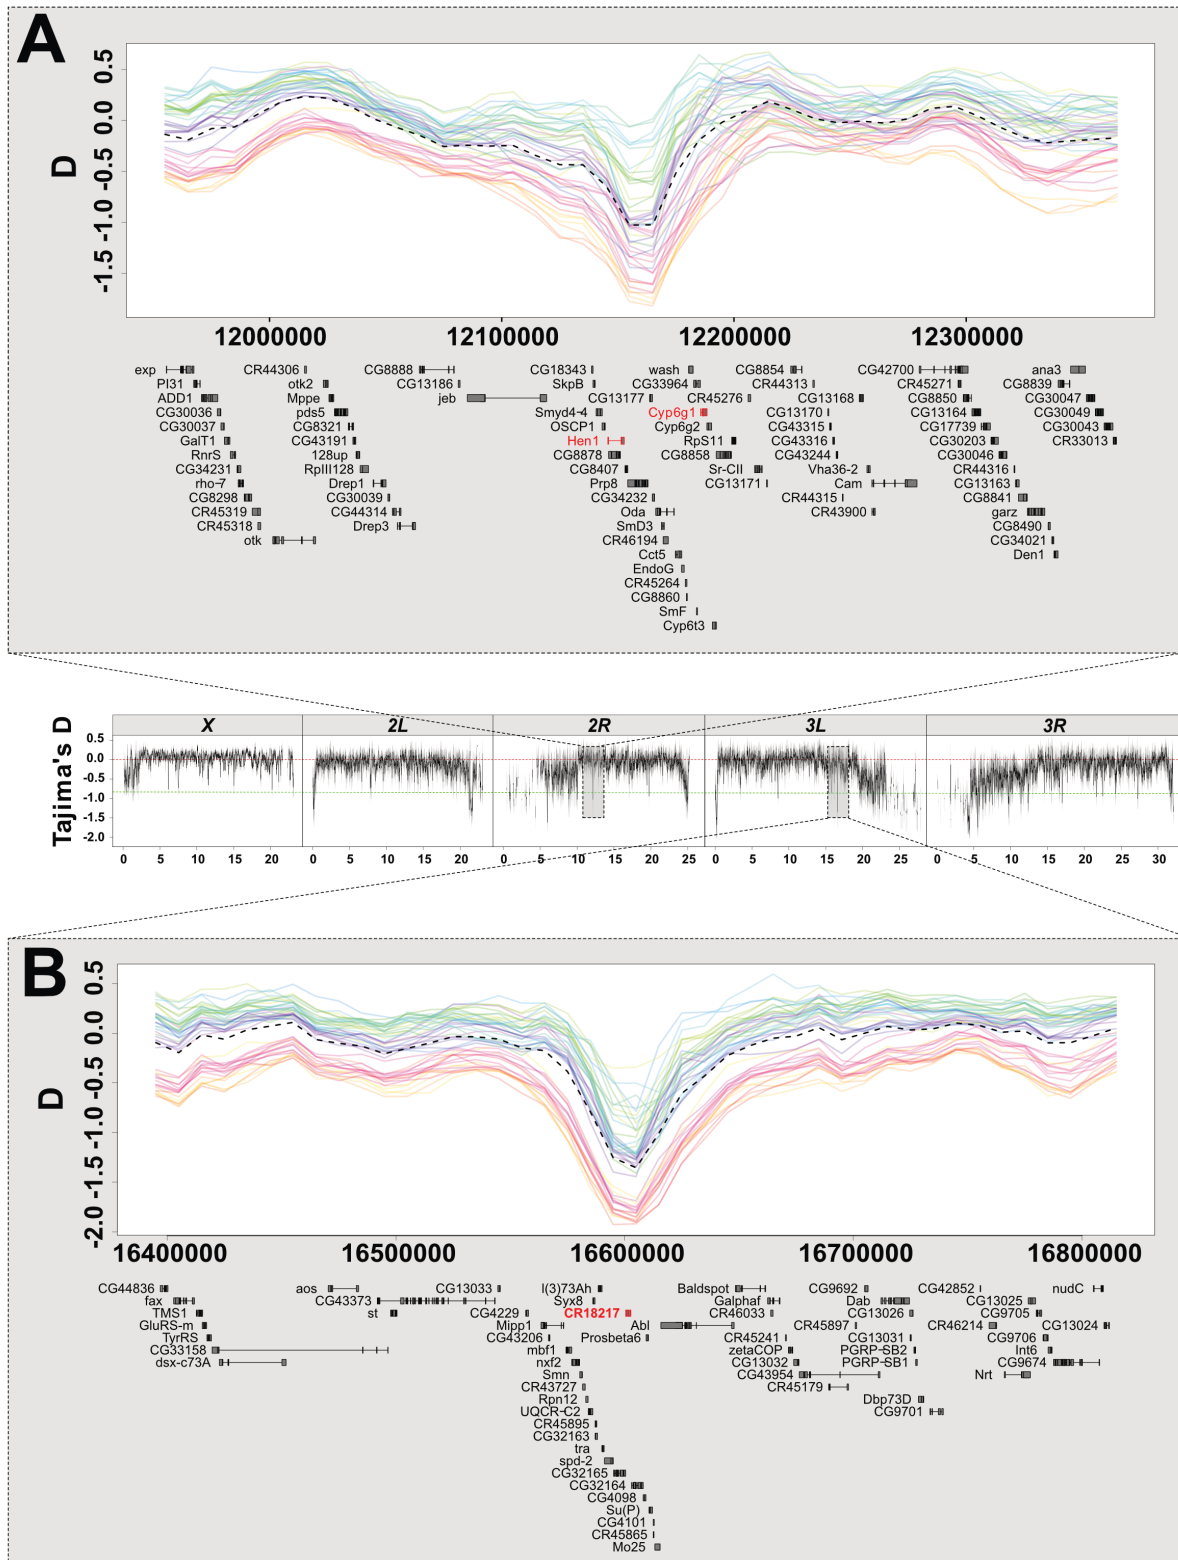

1006

1007

1008 **Figure 3**

**A**

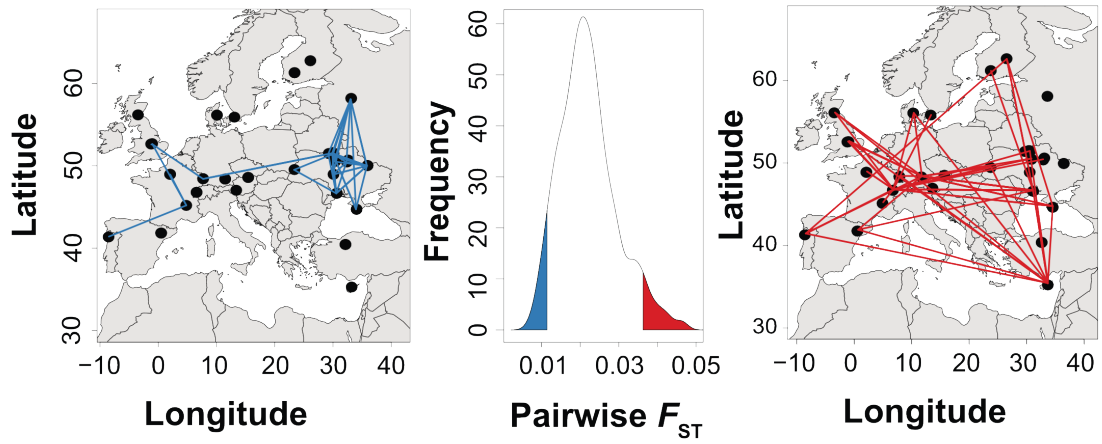

**B**

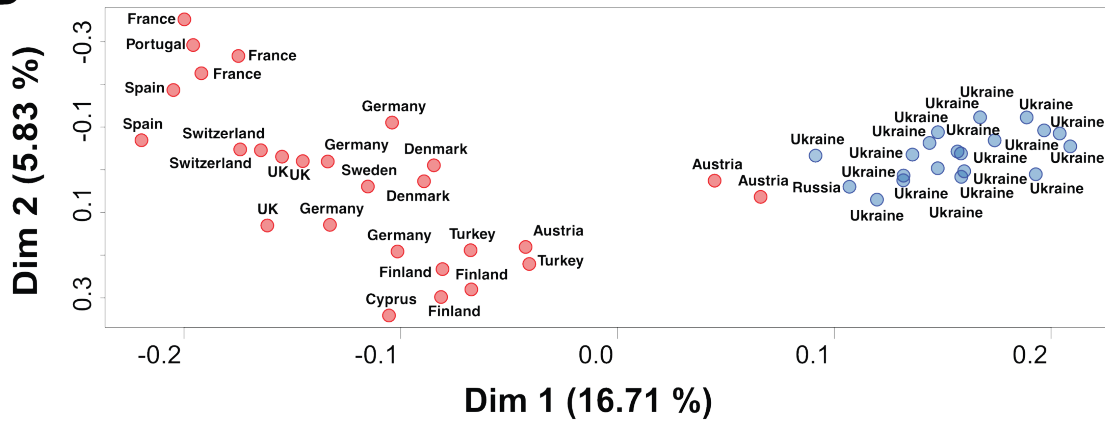

**C**

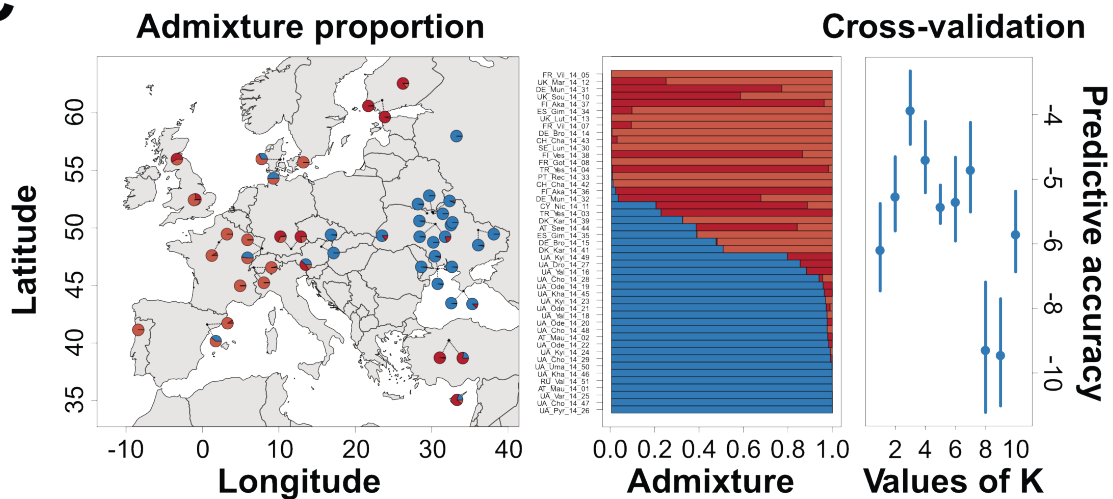

1009

1010

1011 **Figure 4**

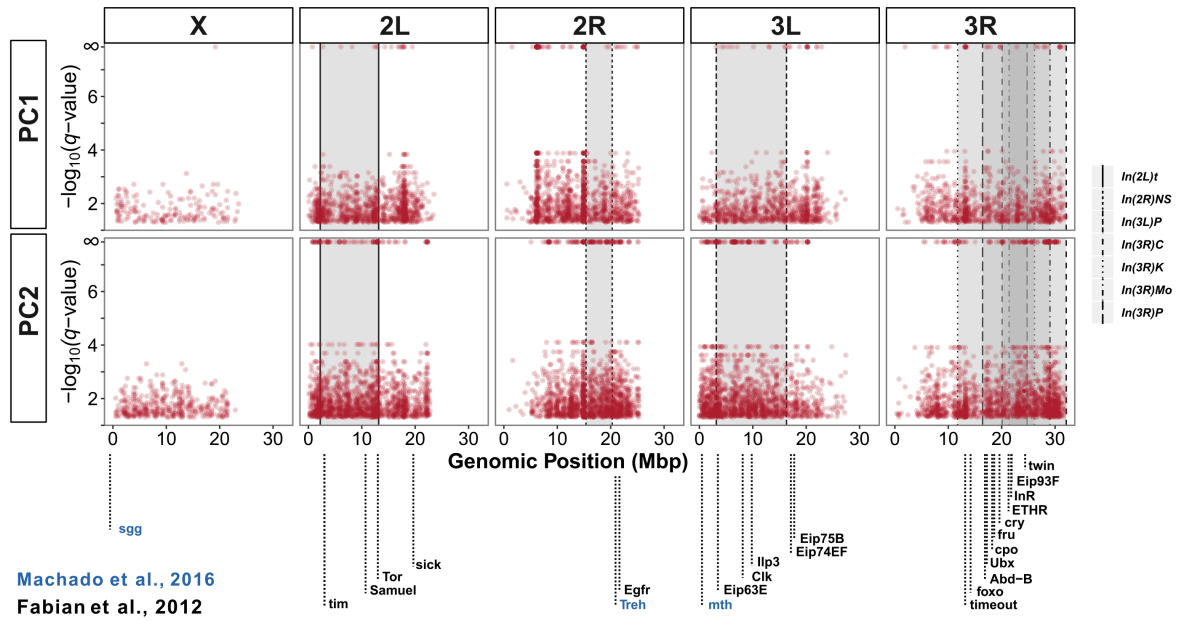

1012



1013 **Figure 5**

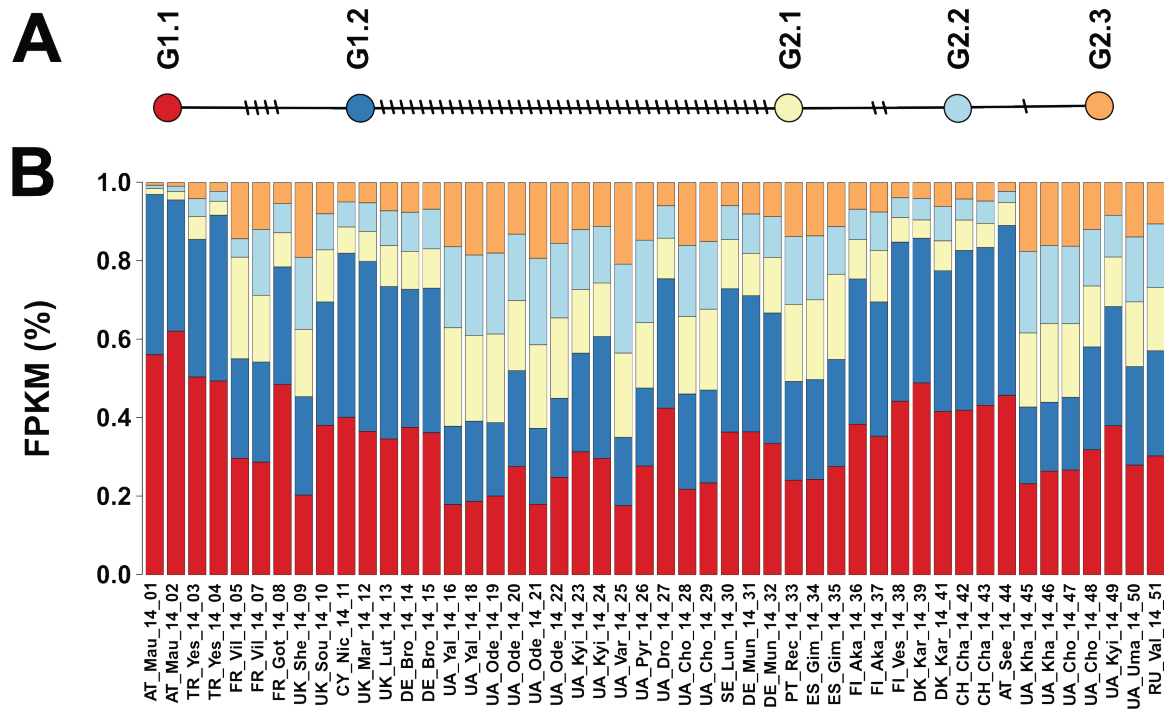

1014

1015

1016 **Figure 6**

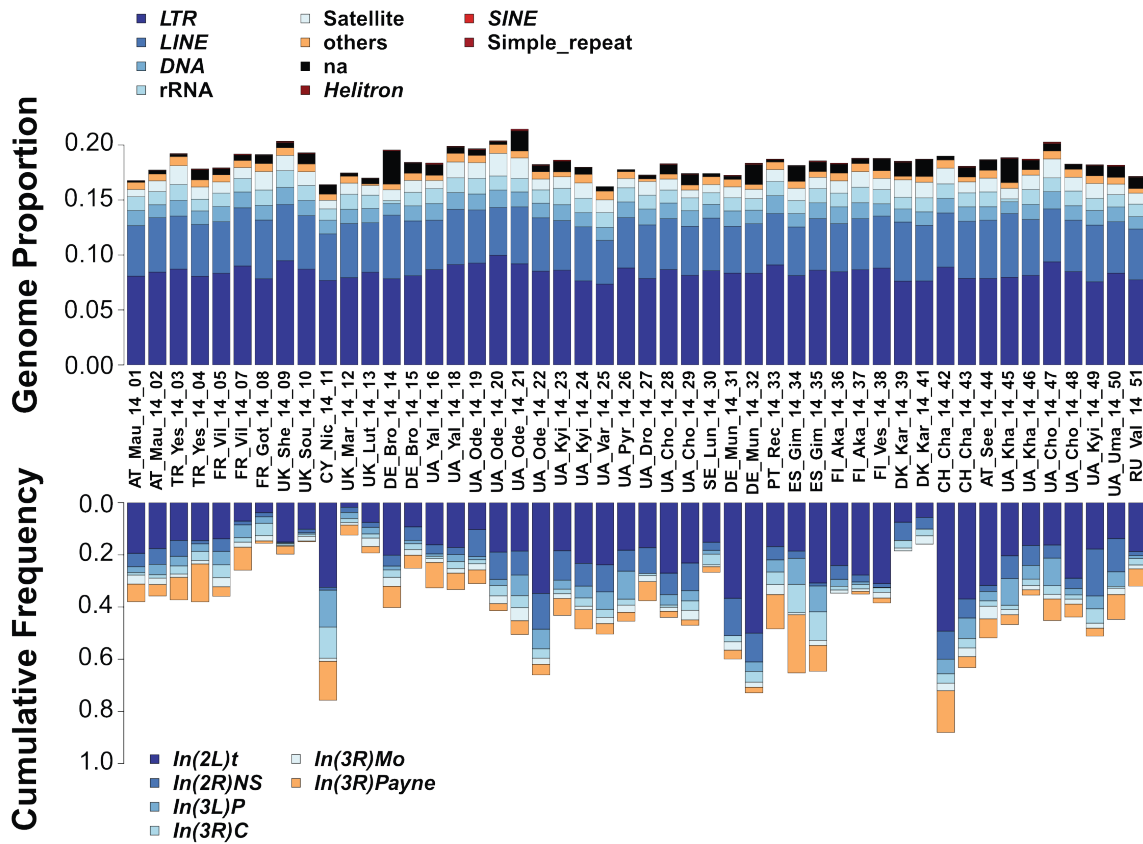

1017

1018

1019 **Figure 7**

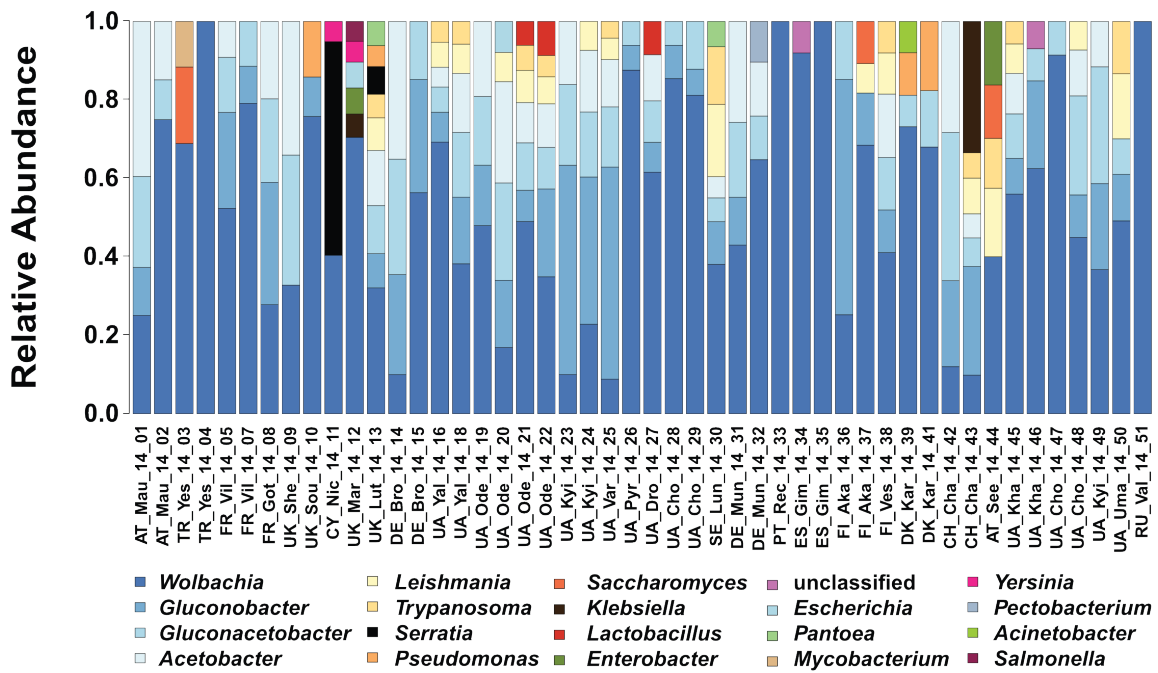

1020
